# Supplementary material for: Patient-derived xenografts and single-cell sequencing identifies three subtypes of tumor-reactive lymphocytes in uveal melanoma metastases
Source: bioRxiv preprint, doi:10.1101/2023.05.16.540908, version 2 (2024-05-21)
Supplement: Supplementary Table 4 [file 540908_file05.xlsx]

## Sheet: Liver_MART1_Liver_Bulk
	baseMean	log2FoldChange	lfcSE	stat	pvalue	padj
MIR1302-2HG	0
FAM138A	0
OR4F5	0
AL627309.1	0
AL627309.3	0
AL627309.2	0
AL627309.5	0
AL627309.4	0
AP006222.2	0
AL732372.1	0
OR4F29	0
AC114498.1	0
OR4F16	0
AL669831.2	0
LINC01409	2.57322	-0.727984	1.49749	0.340695	0.559428
FAM87B	0.0447987	1.58625	4.03887	-0.20282	1
LINC01128	5.79356	0.546166	0.935964	0.346882	0.555884	0.954447
LINC00115	1.27797	0.113942	1.95637	0.000774197	0.977802
FAM41C	0.658064	0.505276	2.79599	0.014398	0.90449
AL645608.6	0
AL645608.2	0
AL645608.4	0
LINC02593	0
SAMD11	0.107891	0.715992	4.02414	-0.175123	1
NOC2L	29.2933	0.224706	0.473799	0.22656	0.634086	0.954447
KLHL17	3.81146	-1.52166	1.21871	1.64089	0.200204	0.954447
PLEKHN1	2.72169	0.488702	1.3306	0.145244	0.703123
PERM1	0.361927	-0.334438	3.46191	0.0315113	0.859105
AL645608.7	0.406726	0.000167852	3.32375	-0.0219225	1
HES4	66.1679	0.897737	0.477884	3.53533	0.0600742	0.954447
ISG15	654.891	-0.0250684	0.254345	0.0106642	0.917751	0.95462
AL645608.1	0.53124	-0.87442	3.21889	0.184819	0.667264
AGRN	1.96283	-1.64187	1.67377	0.922572	0.336801
AL645608.5	0
AL645608.8	0.0447987	1.58625	4.03887	-0.20282	1
RNF223	0
C1orf159	3.40465	-0.0779814	1.21313	0.0236963	0.87766	0.954447
AL390719.3	0
LINC01342	0
AL390719.2	0
TTLL10-AS1	0
TTLL10	0
TNFRSF18	20.6948	1.69531	0.707171	5.74161	0.0165676	0.954447
TNFRSF4	10.4099	0.0342168	0.78863	0.0109725	0.916575	0.95462
SDF4	82.6675	-0.185019	0.325184	0.322708	0.569985	0.954447
B3GALT6	9.76454	0.0364922	0.754138	0.0645539	0.799438	0.954447
C1QTNF12	0.508073	-1.70543	3.60555	0.41086	0.521533
AL162741.1	0
UBE2J2	27.59	0.300913	0.470494	0.423031	0.515429	0.954447
LINC01786	0
SCNN1D	0.197488	1.27084	4.01709	0.0111778	0.915801
ACAP3	6.90886	-0.539409	0.876706	0.423988	0.514954	0.954447
PUSL1	4.50626	0.0816664	1.14113	0.0529572	0.817995	0.954447
INTS11	33.0896	-0.107544	0.440401	0.0650309	0.798714	0.954447
AL139287.1	0
CPTP	7.56514	-0.506693	0.874079	0.343209	0.557983	0.954447
TAS1R3	0.0447987	1.58625	4.03887	-0.20282	1
DVL1	2.40063	0.477141	1.50522	0.107262	0.743283
MXRA8	0
AURKAIP1	115.766	-0.345511	0.305424	1.28814	0.256392	0.954447
CCNL2	22.6737	0.110399	0.557069	0.0892385	0.765147	0.954447
MRPL20-AS1	6.05056	-0.166377	0.921575	0.0354987	0.850554	0.954447
MRPL20	81.8663	0.224802	0.324115	0.520604	0.470584	0.954447
AL391244.2	0.0895974	1.90496	4.03453	0.0747428	0.784552
ANKRD65	0
AL391244.1	0
TMEM88B	0
LINC01770	0
VWA1	0.126184	-0.291738	4.01945	-0.0889138	1
ATAD3C	0.0447987	1.58625	4.03887	-0.20282	1
ATAD3B	8.86783	0.0894066	0.784112	0.013054	0.909036	0.954447
ATAD3A	7.51216	-0.0142216	0.860433	0.0282941	0.866419	0.954447
TMEM240	0
SSU72	81.1949	-0.362418	0.4743	0.585806	0.444045	0.954447
AL645728.1	1.61735	1.60438	2.13372	0.595854	0.440164
FNDC10	4.24009	-0.458119	1.25881	0.198277	0.656115	0.954447
AL691432.4	0.254037	-0.0855153	4.02461	-0.00513642	1
AL691432.2	1.44198	0.804223	1.88796	0.184369	0.667645
MIB2	21.3083	-0.551136	0.519799	1.1187	0.290198	0.954447
MMP23B	0
CDK11B	18.2539	-0.154251	0.560339	0.0874537	0.76744	0.954447
FO704657.1	0.254037	-0.0855153	4.02461	-0.00513642	1
SLC35E2B	5.43753	-1.41546	1.14085	1.74203
CDK11A	22.8692	0.263786	0.514858	0.294157	0.587569	0.954447
SLC35E2A	2.71995	-0.907592	1.49865	0.396597	0.528852
NADK	11.5979	-0.190528	0.738055	0.116182	0.733213	0.954447
GNB1	104.819	-0.260185	0.294319	0.813196	0.367177	0.954447
AL109917.1	0.0630919	0.208959	4.03316	-0.311462	1
CALML6	0
TMEM52	0.197488	1.27084	4.01709	0.0111778	0.915801
CFAP74	0
AL391845.2	0
GABRD	0
AL391845.1	0.0447987	1.58625	4.03887	-0.20282	1
PRKCZ	6.31923	0.382883	0.901069	0.185431	0.666747	0.954447
AL590822.2	0.360898	2.47806	4.02866	0.524002	0.469139
PRKCZ-AS1	0
FAAP20	56.4938	-0.0721649	0.363976	0.0592182	0.807736	0.954447
AL590822.1	0
SKI	62.4583	0.117963	0.423001	0.133886	0.714436	0.954447
AL590822.3	0.305378	0.958972	4.00144	0.000766613	0.977911
MORN1	1.16577	-0.640069	2.18387	0.176353	0.674526
AL589739.1	0.0630919	0.208959	4.03316	-0.311462	1
AL513477.2	0
RER1	68.2816	-0.0607645	0.343429	0.0383475	0.844747	0.954447
PEX10	5.93785	-0.839331	1.01823	0.638285	0.424333	0.954447
PLCH2	6.05918	1.13974	0.975867	1.37286	0.24132	0.954447
AL139246.1	0.0447987	1.58625	4.03887	-0.20282	1
AL139246.4	0
PANK4	4.55525	-0.376944	1.09627	0.16298	0.686428	0.954447
HES5	0
AL139246.5	7.65303	-0.238998	0.847835	0.0794603	0.77803	0.954447
TNFRSF14-AS1	4.86106	-0.429295	1.10705	0.278769	0.597509	0.954447
TNFRSF14	58.5609	0.319951	0.348497	0.844776	0.358034	0.954447
AL139246.3	0.451524	0.253567	3.19968	-0.0400164	1
PRXL2B	5.16214	1.01344	0.983333	1.06522	0.302028	0.954447
MMEL1	0.614934	1.264	3.18511	0.0133023	0.908179
AL831784.1	0
TTC34	0
AC242022.2	0
AC242022.1	0
AL592464.2	0
AL592464.3	0
AL592464.1	0
AL589702.1	0
ACTRT2	0
PRDM16-DT	0
PRDM16	0
AL008733.1	0
AL590438.1	0
AL354743.2	0
AL354743.1	0
ARHGEF16	0
AL512413.1	0
MEGF6	0.658064	0.505276	2.79599	0.014398	0.90449
AL513320.1	0.0447987	1.58625	4.03887	-0.20282	1
TPRG1L	9.99913	0.383775	0.737353	0.311601	0.576699	0.954447
WRAP73	14.3934	-0.0588755	0.631528	0.0087724	0.925378	0.956296
TP73	3.69927	0.0618657	1.40958	0.0413158	0.83893	0.954447
AL136528.1	0
AL136528.2	0
CCDC27	0
SMIM1	0.986822	0.972857	2.34615	0.224047	0.635973
LRRC47	13.533	-0.751534	0.658876	1.29328	0.255444	0.954447
AL365330.1	0
CEP104	16.126	0.223301	0.652319	0.177751	0.673313	0.954447
DFFB	1.70953	-0.0118427	1.69096	0.00939459	0.922785
C1orf174	12.5442	0.125813	0.67473	0.0348705	0.851867	0.954447
LINC01134	0.107891	0.715992	4.02414	-0.175123	1
LINC01346	0
LINC01345	0
LINC02780	0.0630919	0.208959	4.03316	-0.311462	1
AL805961.1	0
LINC01777	0
AL355602.1	0
Z98747.1	0
LINC01646	0
AJAP1	0
Z98886.1	0
BX005132.1	0
LINC02781	0
LINC02782	0
AL139823.1	0
Z98259.3	0
Z98259.2	0
Z98259.1	0
AL365255.1	0.0630919	0.208959	4.03316	-0.311462	1
NPHP4	4.64394	-0.0227456	1.16539	0.0211641	0.884333	0.954447
KCNAB2	55.9024	0.0228749	0.417312	0.0696313	0.791874	0.954447
CHD5	0
RPL22	409.87	0.212193	0.22061	0.928321	0.3353	0.954447
AL031847.1	0
RNF207	1.64768	1.45152	1.78161	0.694646	0.404589
ICMT	12.7597	-0.866872	0.670397	1.64172	0.200089	0.954447
LINC00337	0.215781	0.534001	4.00603	-0.0753652	1
HES3	0
GPR153	5.13228	-0.294558	1.05109	0.0969422	0.75553	0.954447
ACOT7	41.354	-0.468142	0.45372	1.0479	0.305991	0.954447
AL031848.2	0.659733	1.52083	2.87732	0.0740376	0.785546
HES2	0
ESPN	0.469818	-0.462335	3.12455	0.0540941	0.816087
AL031848.1	0
TNFRSF25	6.06547	-0.52842	0.933858	0.31534	0.574422	0.954447
PLEKHG5	0.624894	2.66405	3.10944	1.2168	0.26999
NOL9	9.69802	-0.578021	0.799603	0.660894	0.416244	0.954447
TAS1R1	0
ZBTB48	7.90313	0.406205	0.826355	0.280071	0.596655	0.954447
KLHL21	5.61	-0.132599	1.0091	0.0617828	0.8037	0.954447
PHF13	3.86158	-0.485588	1.29491	0.165864	0.683814	0.954447
THAP3	3.91853	-0.721203	1.1321	0.417001	0.518437	0.954447
DNAJC11	5.81071	-0.37322	1.0431	0.264351	0.607146	0.954447
LINC01672	0
AL591163.1	0
CAMTA1-DT	0.693678	-0.935761	2.64236	0.263312	0.607854
CAMTA1	29.6749	-0.441129	0.463029	0.890778	0.345267	0.954447
AL512330.1	0
CAMTA1-IT1	0
Z97987.1	0
AL365194.1	0
AL359881.3	0
AL359881.2	0
AL359881.1	0
VAMP3	13.7802	-1.74817	0.739364	5.16599	0.0230333	0.954447
Z98884.2	0
PER3	1.23907	-0.687995	2.0438	0.200416	0.654385
Z98884.1	0.0447987	1.58625	4.03887	-0.20282	1
UTS2	0.370006	-1.40593	3.6514	0.326422	0.567774
TNFRSF9	128.136	1.15675	0.282114	16.6344	4.53204e-05	0.0100354
PARK7	320.412	0.247677	0.241429	1.05744	0.303801	0.954447
AL034417.4	0.223993	2.48783	4.02858	0.462849	0.496295
AL034417.3	0.0447987	1.58625	4.03887	-0.20282	1
ERRFI1	2.87199	1.19931	1.32546	0.853305	0.355619
AL034417.2	0
LINC01714	0
AL358876.2	0
SLC45A1	0.229802	-0.117893	3.993	-0.0627769	1
RERE	16.5714	-0.116344	0.579814	0.0433909	0.834991	0.954447
RERE-AS1	0.0447987	1.58625	4.03887	-0.20282	1
AL357552.2	0
ENO1	302.375	-0.0160257	0.276575	0.0153694	0.901336	0.954447
ENO1-AS1	0.215781	0.534001	4.00603	-0.0753652	1
CA6	0.107891	0.715992	4.02414	-0.175123	1
SLC2A7	0
SLC2A5	0
GPR157	0.0447987	1.58625	4.03887	-0.20282	1
MIR34AHG	1.71928	-0.160288	1.69051	0.0136951	0.906839
LNCTAM34A	0.740146	-0.582634	2.4665	0.115829	0.733603
H6PD	3.93969	0.486935	1.15012	0.189528	0.66331	0.954447
SPSB1	2.56474	-1.84001	1.57663	1.52423	0.216981
BX323043.1	0
LINC02606	0
AL928921.1	0
SLC25A33	21.2405	0.533885	0.520948	1.07533	0.299745	0.954447
TMEM201	3.193	2.42486	1.3699	3.1643	0.0752648	0.954447
PIK3CD	42.5469	-0.220249	0.432337	0.362728	0.546995	0.954447
PIK3CD-AS1	0.152689	1.0347	4.01979	-0.0725279	1
PIK3CD-AS2	3.19903	-0.786143	1.63688	0.251726	0.615863	0.954447
CLSTN1	27.6587	-0.348679	0.477115	0.606649	0.436052	0.954447
CTNNBIP1	13.7098	-0.682841	0.649887	1.16103	0.281252	0.954447
AL357140.1	0
AL357140.4	0
LZIC	19.0293	-0.538223	0.569895	0.873139	0.350088	0.954447
AL357140.2	0
NMNAT1	1.75167	-0.781099	1.78377	0.157743	0.691243
AL603962.1	0
RBP7	0.0447987	1.58625	4.03887	-0.20282	1
UBE4B	21.6886	-0.310106	0.5595	0.311419	0.576811	0.954447
KIF1B	15.7613	-0.519918	0.635036	0.683479	0.408391	0.954447
AL139424.3	0
AL139424.2	0
PGD	52.3716	0.142482	0.416832	0.202956	0.652346	0.954447
AL139424.1	0.126184	-0.291738	4.01945	-0.0889138	1
CENPS	8.83131	-0.480542	0.794497	0.362556	0.54709	0.954447
CORT	0.0630919	0.208959	4.03316	-0.311462	1
DFFA	16.9587	-0.46102	0.588152	0.620573	0.430834	0.954447
AL354956.1	0
PEX14	19.3286	-0.325099	0.569236	0.370006	0.543001	0.954447
AL139423.2	0.0630919	0.208959	4.03316	-0.311462	1
CASZ1	12.6516	-0.793933	0.687363	1.38038	0.240036	0.954447
AL139423.1	0.134396	2.1411	4.03184	0.242436	0.622452
C1orf127	0.0630919	0.208959	4.03316	-0.311462	1
TARDBP	22.0951	-0.456743	0.551315	0.681471	0.409081	0.954447
MASP2	0
AL109811.2	0.107891	0.715992	4.02414	-0.175123	1
SRM	49.0292	0.400767	0.430362	0.931337	0.334516	0.954447
EXOSC10	23.2024	-0.491799	0.550839	0.797096	0.371963	0.954447
AL109811.1	0.134396	2.1411	4.03184	0.242436	0.622452
EXOSC10-AS1	0.317128	-0.854077	3.94825	0.146574	0.701831
MTOR	14.6218	0.316442	0.626092	0.26455	0.607011	0.954447
MTOR-AS1	0
ANGPTL7	0
UBIAD1	7.6074	-0.492838	0.833446	0.359057	0.54903	0.954447
AL031291.1	0
DISP3	0
AL590989.1	0.360898	2.47806	4.02866	0.524002	0.469139
LINC01647	0
AL031731.1	0
FBXO2	14.5757	1.87692	0.692506	7.3936	0.00654563	0.549776
FBXO44	12.5754	0.415044	0.668595	0.417324	0.518275	0.954447
FBXO6	21.7444	-0.0784141	0.590785	0.0418722	0.837864	0.954447
MAD2L2	43.3046	-0.276455	0.458541	0.403988	0.525037	0.954447
DRAXIN	1.506	1.14188	1.90333	0.458593	0.498282
AGTRAP	53.2688	0.198502	0.389315	0.323411	0.569565	0.954447
C1orf167	0.0447987	1.58625	4.03887	-0.20282	1
AL953897.1	0
MTHFR	4.78499	-0.509451	1.04011	0.259388	0.610541	0.954447
CLCN6	2.74878	0.103688	1.38258	0.0514454	0.820567
NPPA	0
NPPB	0
AL021155.5	2.85687	-0.653752	1.36472	0.325087	0.568566
KIAA2013	35.0146	0.274021	0.430764	0.426323	0.513799	0.954447
PLOD1	9.84021	-0.996262	0.755685	1.74652	0.186315	0.954447
AL096840.2	0.0447987	1.58625	4.03887	-0.20282	1
MFN2	7.89452	0.694954	0.820074	0.7282	0.393467	0.954447
MIIP	27.609	0.279524	0.544287	0.301813	0.582748	0.954447
TNFRSF8	5.31145	-0.385655	1.33141	0.0947306	0.758247	0.954447
AL357835.1	0
TNFRSF1B	289.502	0.273296	0.260541	1.1079	0.292539	0.954447
VPS13D	19.8981	0.402613	0.556744	0.582185	0.445457	0.954447
LINC02766	0
DHRS3	0.388433	0.988377	3.70535	-0.0918571	1
AC254633.1	0
AADACL4	0
AADACL3	0
C1orf158	0
PRAMEF12	0
PRAMEF1	0
LINC01784	0
PRAMEF11	0
HNRNPCL1	0.0447987	1.58625	4.03887	-0.20282	1
PRAMEF2	0
PRAMEF4	0
PRAMEF10	0
PRAMEF7	0
PRAMEF6	0
PRAMEF27	0
HNRNPCL3	0
PRAMEF25	0
HNRNPCL2	0
AC245056.1	0
PRAMEF26	0
HNRNPCL4	0
PRAMEF9	0
PRAMEF13	0
PRAMEF18	0
PRAMEF5	0
PRAMEF8	0
PRAMEF33	0
PRAMEF15	0
AC243961.1	0
PRAMEF14	0
PRAMEF19	0
PRAMEF17	0
PRAMEF20	0
LRRC38	0
AL354712.1	0
PDPN	0
AL359771.1	0
PRDM2	40.3124	0.295813	0.451955	0.495473	0.481496	0.954447
KAZN	1.92397	-1.87368	1.79429	0.994586	0.318624
AL357873.1	0
KAZN-AS1	0
AL031293.1	0
TMEM51-AS1	0
TMEM51	0.121911	-0.0855153	4.02461	-0.173598	1
C1orf195	0
FHAD1	0.126184	-0.291738	4.01945	-0.0889138	1
AL031283.2	0.126184	-0.291738	4.01945	-0.0889138	1
AL031283.3	0
AL031283.1	0.107891	0.715992	4.02414	-0.175123	1
EFHD2	215.724	-0.209164	0.295811	0.502516	0.478397	0.954447
CTRC	0.0895974	1.90496	4.03453	0.0747428	0.784552
CELA2A	0
CELA2B	0
CASP9	6.70438	-0.494652	0.961498	0.410533	0.521699	0.954447
DNAJC16	4.93077	0.489652	1.04619	0.257626	0.611756	0.954447
AL121992.3	0
AGMAT	4.15901	2.40236	1.25074	3.77435	0.0520441	0.954447
AL121992.1	0.121911	-0.0855153	4.02461	-0.173598	1
DDI2	11.2005	0.27866	0.701996	0.191422	0.661736	0.954447
RSC1A1	0
AL121992.2	0
PLEKHM2	16.3056	-0.339815	0.617862	0.384664	0.535117	0.954447
AL450998.3	0.580096	2.43343	3.48134	0.923283	0.336614
SLC25A34	0.0447987	1.58625	4.03887	-0.20282	1
SLC25A34-AS1	0.254037	-0.0855153	4.02461	-0.00513642	1
TMEM82	0
FBLIM1	0.587456	-0.874386	2.89618	0.178569	0.672606
UQCRHL	20.5031	0.598876	0.577167	1.19824	0.273673	0.954447
AL450998.2	3.21555	-1.20401	1.37925	0.913306
SPEN	33.8566	-0.308323	0.441292	0.542297	0.461482	0.954447
ZBTB17	11.4217	-0.353816	0.706461	0.288046	0.591475	0.954447
SRARP	0
AL355994.3	0
HSPB7	0.508073	-1.70543	3.60555	0.41086	0.521533
CLCNKA	0
CLCNKB	0
FAM131C	0
EPHA2	0
AL451042.2	0
AL451042.1	0
ARHGEF19-AS1	0
ARHGEF19	3.32744	-0.0261331	1.20743	0.00613353	0.937576	0.958732
AL109627.1	0.823918	0.391006	2.86056	0.0925628	0.760944
CPLANE2	0.560951	-1.96149	2.88496	0.759498	0.383486
FBXO42	14.7041	0.448364	0.604654	0.55519	0.456205	0.954447
SZRD1	40.7981	-0.110208	0.407255	0.078861	0.778847	0.954447
SPATA21	0.288621	-0.393689	3.98016	-0.0100219	1
NECAP2	41.1507	0.216606	0.412438	0.320877	0.571081	0.954447
LINC01772	0.254037	-0.0855153	4.02461	-0.00513642	1
AL137802.2	0
AL137802.1	0
LINC01783	0
NBPF1	1.23053	-0.632446	2.01449	0.171846	0.678477
AL137798.1	0
AL137798.2	0
AL021920.1	0
AL021920.3	0
CROCC	8.33271	-0.25305	0.833857	0.138893	0.709384	0.954447
BX284668.1	0
BX284668.2	0
BX284668.5	0
BX284668.6	0.431562	0.244892	3.49005	-0.0127766	1
MFAP2	3.25903	1.16575	3.27401	0.121412	0.727508	0.954447
AL049569.2	0
AL049569.1	0
ATP13A2	7.0768	-0.983848	0.925061	1.18749	0.275836	0.954447
SDHB	45.2204	-0.0357208	0.385809	0.0183434	0.892266	0.954447
PADI2	0
LINC02783	0
AL590644.1	0
PADI1	0
PADI3	0
PADI4	0
PADI6	0
RCC2-AS1	0
RCC2	23.4369	-0.214136	0.513143	0.178792	0.672414	0.954447
ARHGEF10L	0
LINC02810	0
ACTL8	0
AL357509.1	0
LINC01654	0
IGSF21	0
IGSF21-AS1	0
AL591896.1	0
KLHDC7A	0
PAX7	0
TAS1R2	0
ALDH4A1	3.16687	0.579393	1.52742	0.228168	0.632886	0.954447
IFFO2	14.3656	-0.0590809	0.720531	0.110623	0.739436	0.954447
AL137127.1	0.317128	-0.854077	3.94825	0.146574	0.701831
UBR4	40.0887	-0.0636384	0.479328	0.056679	0.811824	0.954447
EMC1-AS1	3.15265	0.217278	1.25856	0.0494927	0.823948	0.954447
EMC1	6.65785	0.414919	0.893101	0.223306	0.636532	0.954447
MRTO4	17.1803	0.577893	0.818317	0.53191	0.465805	0.954447
AKR7A3	0.0630919	0.208959	4.03316	-0.311462	1
AKR7A2	24.3079	-0.114155	0.508824	0.0543489	0.815662	0.954447
SLC66A1	1.72338	-3.04294	1.88489	2.8144	0.0934217
CAPZB	267.651	-0.0353102	0.241036	0.0220656	0.881913	0.954447
MICOS10	124.089	0.152957	0.316148	0.284325	0.59388	0.954447
AL031727.2	1.11669	-0.743118	2.21915	0.207123	0.649031
NBL1	48.7968	0.576256	0.466807	1.52637	0.216658	0.954447
HTR6	0
TMCO4	8.51584	0.336277	0.773717	0.195307	0.658536	0.954447
RNF186	0
AL391883.1	0
OTUD3	5.8665	-0.394436	1.0075	0.15251	0.696148	0.954447
PLA2G2E	0
PLA2G2A	0
PLA2G5	0
PLA2G2D	0.185003	-0.624923	4.00209	-0.00289437	1
PLA2G2F	0
Z98257.1	0
PLA2G2C	0.121911	-0.0855153	4.02461	-0.173598	1
UBXN10-AS1	0.98088	0.443061	2.27914	0.0897341	0.764515
UBXN10	0.301106	1.16519	4.00663	0.0126983	0.910279
LINC01757	0
Z98257.2	0
VWA5B1	0
AL020998.1	0
LINC01141	0
AL139254.1	0
AL139254.2	0
AL139254.3	0
CAMK2N1	0.665304	0.663365	2.75241	0.0768354	0.781633
MUL1	10.9126	-0.0536296	0.707905	0.00641288	0.936173	0.958276
FAM43B	0
CDA	0.986822	0.972857	2.34615	0.224047	0.635973
PINK1	6.67943	-0.212427	0.912734	0.0620246	0.803324	0.954447
PINK1-AS	0.818965	1.51393	2.53961	0.387246	0.533751
DDOST	78.0552	0.279794	0.312945	0.808342	0.368611	0.954447
KIF17	0.806908	-1.77582	2.82759	0.599976	0.438587
SH2D5	0
AL663074.1	0
HP1BP3	128.181	-0.262272	0.274049	0.930729	0.334674	0.954447
EIF4G3	64.3932	0.0835632	0.335639	0.0621588	0.803116	0.954447
AL031005.2	0.0630919	0.208959	4.03316	-0.311462	1
ECE1	27.8493	0.239651	0.490575	0.300283	0.583705	0.954447
AL031005.1	0
AL031728.1	0.0630919	0.208959	4.03316	-0.311462	1
AL592309.2	0
NBPF3	0.234074	-0.18891	3.98948	-0.0344282	1
ALPL	0
LINC02596	0
RAP1GAP	1.68267	0.00489098	2.02971	0.0386637	0.844116
USP48	51.9675	0.326837	0.385977	0.718328	0.396693	0.954447
LDLRAD2	0
HSPG2	1.5287	0.172835	2.19564	0.0208289	0.885246
CELA3B	0
CELA3A	0
LINC01635	0
LINC00339	5.16902	-0.755402	1.00459	0.599234	0.438871	0.954447
CDC42	194.496	-0.273669	0.259435	1.10348	0.293504	0.954447
CDC42-AS1	0.659093	-1.1386	2.73754	0.318522	0.572497
CDC42-IT1	0
WNT4	0.361927	-0.334438	3.46191	0.0315113	0.859105
AL445253.1	0
ZBTB40	7.6499	0.106977	0.817983	0.0339217	0.853873	0.954447
ZBTB40-IT1	0
EPHA8	0
C1QA	0.0630919	0.208959	4.03316	-0.311462	1
C1QC	0.126184	-0.291738	4.01945	-0.0889138	1
C1QB	0.0630919	0.208959	4.03316	-0.311462	1
EPHB2	0
AL512444.1	0
LACTBL1	0
TEX46	0
KDM1A	10.7914	-0.240694	0.710158	0.118015	0.731197	0.954447
AL031428.1	1.59958	2.19549	1.89337	1.38226	0.239717
LUZP1	17.0547	0.327469	0.651315	0.290099	0.590157	0.954447
HTR1D	0
LINC01355	0.343634	0.743642	3.88392	-0.0972175	1
AL109936.6	0.170982	0.215295	4.0104	-0.103097	1
HNRNPR	84.3784	-0.299344	0.307828	0.937281	0.332978	0.954447
ZNF436	0.966141	-0.533152	2.39367	0.0888015	0.765706
ZNF436-AS1	0.197488	1.27084	4.01709	0.0111778	0.915801
AL109936.2	0
TCEA3	4.13284	0.171081	1.54773	0.0562878	0.812462	0.954447
ASAP3	0
E2F2	4.95719	-1.84998	1.16747	2.31479	0.128149	0.954447
AL021154.1	0
ID3	34.1857	2.31942	0.670808	10.9088	0.000957108	0.137134
AL450043.1	0.0447987	1.58625	4.03887	-0.20282	1
MDS2	0.580096	2.43343	3.48134	0.923283	0.336614
RPL11	1450.41	0.225893	0.21284	1.12512	0.288818	0.954447
ELOA-AS1	3.01537	-0.974256	1.34842	0.63796	0.42445
ELOA	22.626	0.0468556	0.522839	0.0142658	0.904927	0.954447
PITHD1	34.9352	-0.135651	0.44187	0.0961994	0.756439	0.954447
LYPLA2	40.6354	-0.101091	0.415233	0.0740791	0.785488	0.954447
GALE	6.97212	-0.402955	1.01069	0.192581	0.660777	0.954447
HMGCL	7.97256	0.576179	0.880065	0.520052	0.470819	0.954447
FUCA1	1.92078	0.425714	1.68001	0.0716157	0.788999
CNR2	0.0447987	1.58625	4.03887	-0.20282	1
AL590609.3	0
PNRC2	56.6443	-0.254809	0.388939	0.440556	0.506854	0.954447
SRSF10	104.677	-0.237829	0.296086	0.68318	0.408494	0.954447
AL591178.1	0
MYOM3	0
AL591178.2	0
IL22RA1	0.252367	-1.00038	3.98517	0.148159	0.700301
IFNLR1	4.70616	-2.00698	1.13496	3.26382	0.0708241	0.954447
LINC02800	0
AL138902.1	0
GRHL3	0
STPG1	2.77856	-1.43413	1.42448	1.09877	0.294536
NIPAL3	24.6381	0.349878	0.490269	0.511682	0.474412	0.954447
RCAN3AS	3.86367	-0.292869	1.19297	0.126533	0.722055	0.954447
RCAN3	28.2778	0.117027	0.524788	0.0763312	0.782332	0.954447
NCMAP-DT	0.498594	1.08314	3.0695	0.134896	0.713409
NCMAP	0
SRRM1	162.858	0.126259	0.27681	0.216404	0.641794	0.954447
AL445648.1	0
CLIC4	8.13817	-1.16426	1.17722	0.903404	0.341871	0.954447
RUNX3	308.182	0.172267	0.306644	0.326653	0.567637	0.954447
AL445471.1	2.89075	2.41698	1.44599	2.88338	0.0894982
AL445471.2	0
LINC02793	0
AL050344.1	0.0447987	1.58625	4.03887	-0.20282	1
AL031432.1	0
SYF2	74.1979	0.258765	0.335654	0.599648	0.438712	0.954447
AL031432.4	0.532909	-0.739595	2.96917	0.135923	0.712368
AL031432.5	0
RSRP1	108.883	-0.29141	0.330798	0.803815	0.369955	0.954447
AL031432.3	0.170982	0.215295	4.0104	-0.103097	1
RHD	0.451524	0.253567	3.19968	-0.0400164	1
TMEM50A	162.558	0.0729532	0.258064	0.0818646	0.774786	0.954447
RHCE	0.197488	1.27084	4.01709	0.0111778	0.915801
MACO1	30.6189	0.114202	0.476133	0.0932302	0.76011	0.954447
LDLRAP1	4.35591	0.49278	1.07959	0.213384	0.644128	0.954447
AL606491.1	0
MAN1C1	0.988975	0.350369	2.3207	0.0781065	0.77988
AL031280.1	0
SELENON	3.09374	0.222439	1.46393	0.0964886	0.756085	0.954447
AL020996.1	0.189276	-0.695941	3.99858	0.0452257	0.83159
MTFR1L	6.40471	-0.33388	0.91121	0.137356	0.710923	0.954447
AL020996.3	0
AUNIP	0.311187	-1.20946	3.92836	0.217914	0.640634
AL033528.2	0.189276	-0.695941	3.99858	0.0452257	0.83159
PAQR7	0
STMN1	185.283	-0.963428	0.332633	8.1174	0.00438425	0.418781
PAFAH2	2.88252	-0.400417	1.3621	0.109545	0.740662
EXTL1	0.834132	1.23258	2.90136	0.151391	0.697209
SLC30A2	0
AL391650.2	0
TRIM63	6.00525	0.974837	2.55527	0.141189	0.707101	0.954447
PDIK1L	4.43149	0.629029	1.06587	0.361316	0.547776	0.954447
FAM110D	0
C1orf232	0
AL391650.1	0.0447987	1.58625	4.03887	-0.20282	1
ZNF593	29.114	0.196835	0.537496	0.163299	0.686137	0.954447
CNKSR1	0.0447987	1.58625	4.03887	-0.20282	1
CATSPER4	0
CEP85	5.29503	0.0302148	0.966305	0.0021093	0.963368	0.972046
SH3BGRL3	1938.04	0.324469	0.2609	1.54213	0.214301	0.954447
UBXN11	10.391	1.02255	0.711057	2.07956	0.149284	0.954447
CD52	1125.71	0.253176	0.226049	1.25244	0.263087	0.954447
CRYBG2	1.88542	0.771021	1.72178	0.198281	0.656112
ZNF683	96.2442	0.707518	0.444688	2.51872	0.112502	0.954447
LIN28A	0
DHDDS	13.6767	0.119978	0.623761	0.0381026	0.845237	0.954447
AL513365.2	0.107891	0.715992	4.02414	-0.175123	1
HMGN2	303.383	-0.527998	0.265699	3.891	0.0485454	0.954447
RPS6KA1	28.4661	-0.0365938	0.52224	0.0285521	0.865817	0.954447
AL512408.1	0.580096	2.43343	3.48134	0.923283	0.336614
ARID1A	27.4264	-0.246841	0.49221	0.281628	0.595636	0.954447
PIGV	3.65445	0.105558	1.20373	0.0228219	0.879921	0.954447
ZDHHC18	18.7107	0.554013	0.551669	1.03052	0.310037	0.954447
SFN	0.0630919	0.208959	4.03316	-0.311462	1
GPN2	11.4303	-0.604823	0.690791	0.793933	0.372914	0.954447
AL034380.1	0
GPATCH3	7.60492	0.357769	0.881061	0.167578	0.682274	0.954447
NUDC	70.3123	-0.109588	0.333089	0.107798	0.742665	0.954447
NR0B2	0
KDF1	0
TRNP1	0.43904	-1.56584	3.18353	0.455739	0.499622
TENT5B	0
SLC9A1	9.92851	0.728308	0.757443	0.968174	0.325136	0.954447
AL590640.1	0
WDTC1	7.90068	-0.61451	0.818	0.623502	0.429749	0.954447
TMEM222	17.323	0.0231464	0.584002	0.0409989	0.83954	0.954447
SYTL1	34.4354	0.877068	0.485362	3.35527	0.06699	0.954447
MAP3K6	4.13201	3.15293	1.3351	5.43076	0.0197851	0.954447
FCN3	0
CD164L2	0.0447987	1.58625	4.03887	-0.20282	1
GPR3	0
WASF2	78.0826	-0.22522	0.316859	0.502778	0.478282	0.954447
FO393419.2	0.126184	-0.291738	4.01945	-0.0889138	1
BX293535.1	0.0895974	1.90496	4.03453	0.0747428	0.784552
AHDC1	3.44287	0.475655	1.23861	0.170528	0.679643	0.954447
FGR	3.70809	-1.40518	1.24024	1.21634	0.270079	0.954447
LINC02574	0.121911	-0.0855153	4.02461	-0.173598	1
IFI6	413.708	0.658627	0.341799	3.66854	0.0554487	0.954447
AL445490.1	0.0630919	0.208959	4.03316	-0.311462	1
AL020997.5	0.152689	1.0347	4.01979	-0.0725279	1
FAM76A	9.29843	-0.098823	0.774918	0.0216963	0.882898	0.954447
STX12	22.4979	-0.144397	0.518957	0.0775719	0.780615	0.954447
AL020997.2	0
AL020997.3	0
AL020997.4	0.0630919	0.208959	4.03316	-0.311462	1
PPP1R8	9.07599	0.606248	0.776482	0.665767	0.414531	0.954447
THEMIS2	1.23326	0.0512285	2.1824	0.0435775	0.834642
RPA2	28.0705	0.329026	0.48378	0.544246	0.460679	0.954447
SMPDL3B	0
AL512288.1	0
XKR8	4.78532	0.514867	1.02115	0.276349	0.599104	0.954447
EYA3	18.3647	0.124169	0.553213	0.0653245	0.79827	0.954447
PTAFR	0.0447987	1.58625	4.03887	-0.20282	1
DNAJC8	90.2585	0.0347761	0.302333	0.0133259	0.908098	0.954447
ATP5IF1	205.758	0.148366	0.246211	0.369222	0.543429	0.954447
AL353622.1	1.11198	2.14179	2.2992	1.01875	0.312815
AL353622.2	0.0630919	0.208959	4.03316	-0.311462	1
SESN2	19.6206	0.116443	0.586632	0.12346	0.725312	0.954447
MED18	3.34121	-0.808544	1.27583	0.452335	0.501228	0.954447
PHACTR4	18.5977	0.248158	0.543014	0.211042	0.645952	0.954447
RCC1	10.5465	-0.481636	0.778501	0.476196	0.490151	0.954447
SNHG3	12.7487	-0.434034	0.697592	0.386514	0.534137	0.954447
TRNAU1AP	26.8912	-0.219472	0.466893	0.229094	0.632197	0.954447
SNHG12	60.7699	-0.0368323	0.372995	0.0560674	0.812823	0.954447
TAF12	22.4769	-0.363266	0.508774	0.504287	0.477622	0.954447
RAB42	0
LINC01715	0.229802	-0.117893	3.993	-0.0627769	1
AL360012.1	0.126184	-0.291738	4.01945	-0.0889138	1
GMEB1	11.8377	0.181888	0.699921	0.126785	0.721789	0.954447
YTHDF2	41.1915	0.0899312	0.392253	0.0555504	0.813672	0.954447
OPRD1	0
AL009181.1	0
EPB41	33.7856	-0.140213	0.43325	0.129864	0.718573	0.954447
TMEM200B	0.624894	2.66405	3.10944	1.2168	0.26999
AL357500.1	0.0630919	0.208959	4.03316	-0.311462	1
SRSF4	66.7743	-0.0458665	0.335759	0.0187258	0.891155	0.954447
MECR	7.49143	0.756992	0.966125	0.700018	0.402778	0.954447
AL590729.1	0
PTPRU	0.624894	2.66405	3.10944	1.2168	0.26999
LINC01756	0
AC092265.1	0
AL645944.2	0
LINC01648	0
AL137076.1	0
AL161638.2	0
AL161638.1	0
MATN1	0.0630919	0.208959	4.03316	-0.311462	1
MATN1-AS1	0.189276	-0.695941	3.99858	0.0452257	0.83159
AL137857.1	0.0895974	1.90496	4.03453	0.0747428	0.784552
LAPTM5	378.981	0.277421	0.237793	1.36134	0.243305	0.954447
AL137027.1	0
LINC01778	0
AL445235.1	0
SDC3	0.360898	2.47806	4.02866	0.524002	0.469139
PUM1	34.4025	0.0954187	0.471122	0.104952	0.745966	0.954447
NKAIN1	0.298835	0.421515	4.01557	-0.0806786	1
SNRNP40	34.6643	0.0302776	0.437717	0.0278455	0.867472	0.954447
ZCCHC17	37.3382	-0.148683	0.449833	0.124142	0.724585	0.954447
AL451070.1	0.0895974	1.90496	4.03453	0.0747428	0.784552
FABP3	8.95904	0.466723	1.17283	0.179393	0.671895	0.954447
SERINC2	1.4053	-1.18559	2.26619	0.179876	0.67148
LINC01226	0
AC114488.1	0
TINAGL1	0
HCRTR1	0
PEF1	33.2612	-0.436137	0.440841	0.964478	0.326061	0.954447
AC114488.2	0.16671	0.421515	4.01557	-0.13967	1
AC114488.3	0.0630919	0.208959	4.03316	-0.311462	1
COL16A1	0.624894	2.66405	3.10944	1.2168	0.26999
ADGRB2	0.134396	2.1411	4.03184	0.242436	0.622452
AL354919.2	0
SPOCD1	0
AL354919.1	0
AL136115.2	0.603184	2.26341	2.87187	0.71331	0.398347
PTP4A2	136.018	-0.427358	0.295147	2.06464	0.150751	0.954447
AL136115.1	0.0447987	1.58625	4.03887	-0.20282	1
AL136115.3	0
KHDRBS1	109.015	-0.0383099	0.285564	0.0179717	0.893356	0.954447
AL445248.1	0.189276	-0.695941	3.99858	0.0452257	0.83159
TMEM39B	9.58651	-0.00400268	0.745871	0.0150788	0.902269	0.954447
KPNA6	17.7478	0.144481	0.586016	0.0612913	0.804466	0.954447
AL049795.2	0
TXLNA	18.7282	-0.264744	0.548951	0.232353	0.629785	0.954447
CCDC28B	21.9127	-1.28893	0.603593	4.36379	0.0367106	0.954447
AL049795.1	0
IQCC	0.170982	0.215295	4.0104	-0.103097	1
DCDC2B	0.0895974	1.90496	4.03453	0.0747428	0.784552
TMEM234	5.09464	0.75639	0.989324	0.592128	0.441597	0.954447
EIF3I	95.4501	0.350589	0.345749	1.07209	0.300475	0.954447
FAM167B	13.96	0.626909	1.71669	0.131722	0.716654	0.954447
LCK	228.109	-0.0557077	0.272009	0.0441872	0.833506	0.954447
HDAC1	61.4651	-0.341443	0.358589	0.895272	0.344053	0.954447
MARCKSL1	20.2504	0.478608	0.815393	0.3803	0.537443	0.954447
AL109945.1	0
TSSK3	0
FAM229A	0.941906	-0.31273	2.24564	0.0694728	0.792106
BSDC1	18.4072	0.494059	0.559651	0.78732	0.374912	0.954447
ZBTB8B	0
ZBTB8A	0.0630919	0.208959	4.03316	-0.311462	1
ZBTB8OS	33.8681	-0.0834995	0.431036	0.0392676	0.84292	0.954447
RBBP4	56.5558	0.110371	0.360489	0.132168	0.716195	0.954447
SYNC	10.5395	0.268156	0.709718	0.170851	0.679356	0.954447
AC114489.1	0
KIAA1522	0.360898	2.47806	4.02866	0.524002	0.469139
YARS	59.9873	0.0953892	0.34819	0.0860648	0.769241	0.954447
S100PBP	28.1286	-0.137743	0.462861	0.0884763	0.766123	0.954447
FNDC5	0
HPCA	0
TMEM54	1.87123	-1.28336	1.68854	0.591726	0.441752
AL031602.2	1.43835	0.335561	1.98593	0.0633547	0.80127
RNF19B	17.5565	0.0335856	0.604315	0.0654345	0.798104	0.954447
AL020995.1	1.31443	1.59913	2.10259	0.51796	0.471713
AK2	53.7021	0.321314	0.380394	0.72279	0.39523	0.954447
AZIN2	2.57346	1.98336	1.55203	1.81028	0.178475
TRIM62	4.77525	0.0576716	1.04728	0.017501	0.894754	0.954447
AL662907.3	0
ZNF362	5.39678	-0.155068	0.996625	0.073971	0.78564	0.954447
AL513327.3	0
A3GALT2	0
AL513327.1	0.559415	6.59489e-05	2.93324	-0.00745192	1
PHC2	11.6698	-0.132167	0.673503	0.0384545	0.844533	0.954447
AL513327.2	0
ZSCAN20	0.0895974	1.90496	4.03453	0.0747428	0.784552
CSMD2	0
HMGB4	0
CSMD2-AS1	0
C1orf94	0
AC099565.1	0
SMIM12	38.9185	-0.24684	0.419087	0.354502	0.551576	0.954447
GJB5	0
GJB4	0
AL121988.1	0
GJB3	0
GJA4	0
AL122010.1	0
DLGAP3	0.26058	0.770144	4.00332	-0.0381966	1
TMEM35B	40.425	0.113365	0.434699	0.139012	0.709265	0.954447
ZMYM6	11.8172	-0.215178	0.675116	0.103177	0.74805	0.954447
ZMYM1	3.92521	0.4685	1.17122	0.174022	0.676562	0.954447
AL590434.1	0
SFPQ	208.692	0.277168	0.251377	1.21939	0.26948	0.954447
ZMYM4	14.918	-0.767061	0.637014	1.51382	0.218557	0.954447
ZMYM4-AS1	0.0630919	0.208959	4.03316	-0.311462	1
KIAA0319L	42.2675	-0.0897812	0.440477	0.0944208	0.75863	0.954447
NCDN	18.3786	0.705931	0.573176	1.57033	0.21016	0.954447
AC004865.2	14.3403	0.205055	0.613708	0.11537	0.734111	0.954447
TFAP2E	2.2716	1.39649	1.53138	0.849368	0.356731
PSMB2	107.515	-0.300737	0.320959	0.873738	0.349922	0.954447
C1orf216	6.21488	-0.455661	0.937442	0.282386	0.595142	0.954447
CLSPN	34.2771	-0.463034	0.535762	0.752757	0.385605	0.954447
AL354864.1	0
AGO4	10.3069	-1.00907	0.763767	1.78716	0.181273	0.954447
AGO1	4.58778	-0.246599	1.05522	0.0834603	0.772662	0.954447
AL139286.3	0
AL139286.2	0
AGO3	25.1065	0.127073	0.508993	0.0974739	0.754882	0.954447
AL138787.2	1.073	0.747744	2.16118	0.107828	0.74263
TEKT2	0
ADPRHL2	25.4532	-0.0259719	0.483229	0.0274801	0.868337	0.954447
COL8A2	0.0447987	1.58625	4.03887	-0.20282	1
TRAPPC3	34.2742	0.0442529	0.433554	0.011717	0.913801	0.954558
MAP7D1	44.3838	-0.381287	0.393868	0.940728	0.332091	0.954447
THRAP3	93.3705	0.116053	0.301059	0.171843	0.678479	0.954447
SH3D21	3.08368	-0.479329	1.30371	0.14508	0.703282
EVA1B	34.414	0.524706	0.504463	1.19547	0.27423	0.954447
AL591845.1	0.580096	2.43343	3.48134	0.923283	0.336614
STK40	21.2693	-0.247812	0.548733	0.290538	0.589876	0.954447
LSM10	40.3549	0.0231356	0.410892	0.0373382	0.846778	0.954447
OSCP1	0.254037	-0.0855153	4.02461	-0.00513642	1
MRPS15	63.7172	0.212097	0.406387	0.347905	0.555302	0.954447
CSF3R	0
AL596257.1	0
AC117945.2	0
AC117945.1	0
GRIK3	0
AL031430.1	0
AL353604.1	0
LINC01137	4.63252	0.245001	1.0282	0.0589029	0.808238	0.954447
ZC3H12A	65.3582	1.18604	0.382589	9.63444	0.00190962	0.226896
MEAF6	55.5384	-0.218911	0.366344	0.357286	0.550017	0.954447
SNIP1	21.856	0.189939	0.516345	0.143215	0.705106	0.954447
DNALI1	0
GNL2	23.7502	0.0235222	0.534648	0.01319	0.908566	0.954447
AL513220.1	0
RSPO1	0
C1orf109	3.9234	0.385545	1.18087	0.109169	0.741092	0.954447
CDCA8	12.8276	-1.05122	0.700793	2.12439	0.144971	0.954447
EPHA10	0
MANEAL	1.49041	-0.220514	1.90498	0.0519558	0.819694
AL929472.3	0
YRDC	11.9647	-0.132044	0.686232	0.0548109	0.814894	0.954447
C1orf122	41.1357	-0.202498	0.397485	0.259785	0.610268	0.954447
MTF1	10.5899	0.512839	0.700307	0.541869	0.461659	0.954447
AL929472.2	0
INPP5B	4.46912	0.176717	1.09805	0.101146	0.750458	0.954447
SF3A3	31.5474	-0.0810297	0.440415	0.044943	0.832109	0.954447
FHL3	1.89237	3.09196	1.81833	3.0287	0.0818036
UTP11	15.8678	-0.285491	0.595178	0.227242	0.633576	0.954447
POU3F1	3.28172	-2.20861	1.41664	2.67624	0.101856	0.954447
MIR3659HG	0.126184	-0.291738	4.01945	-0.0889138	1
LINC02786	0
AL390839.1	0
AL390839.2	0
LINC01343	0
LINC01685	0
AL354702.2	0
RRAGC	13.1863	0.0451855	0.673749	0.00921438	0.923527	0.9556
AL139260.1	3.38004	0.257905	1.29791	0.0785178	0.779316	0.954447
MYCBP	21.7008	-0.321315	0.524652	0.373063	0.541339	0.954447
GJA9	0.0630919	0.208959	4.03316	-0.311462	1
RHBDL2	0.211509	0.740219	4.01121	-0.0872678	1
AKIRIN1	66.5133	0.424533	0.362908	1.36982	0.241843	0.954447
NDUFS5	195.795	0.317442	0.246736	1.66262	0.197251	0.954447
MACF1	107.46	0.067619	0.297691	0.0677906	0.794581	0.954447
AL356055.1	0
AL442071.2	0.121911	-0.0855153	4.02461	-0.173598	1
AL442071.1	0.215781	0.534001	4.00603	-0.0753652	1
BMP8A	7.63771	0.340025	0.937563	0.197674	0.656605	0.954447
PABPC4	53.2088	0.583854	0.397836	2.18541	0.139324	0.954447
PABPC4-AS1	0.682061	1.40816	2.92922	0.296344	0.586184
HEYL	0
AL035404.2	0
NT5C1A	0
HPCAL4	0.107891	0.715992	4.02414	-0.175123	1
PPIE	21.1627	0.4643	0.527734	0.818598	0.36559	0.954447
BMP8B	0.451524	0.253567	3.19968	-0.0400164	1
OXCT2	12.4326	1.03351	0.670744	2.37636	0.123185	0.954447
BMP8B-AS1	0
AL033527.3	0.0630919	0.208959	4.03316	-0.311462	1
AL033527.4	0.0447987	1.58625	4.03887	-0.20282	1
LINC02811	0
TRIT1	2.78531	-0.255981	1.4177	0.0375695	0.84631
MYCL	0
AL033527.2	0
MFSD2A	0.211509	0.740219	4.01121	-0.0872678	1
CAP1	181.969	-0.118195	0.260068	0.208446	0.647988	0.954447
PPT1	27.8078	-0.0523914	0.49905	0.0866217	0.768517	0.954447
RLF	42.5755	0.189861	0.468244	0.229908	0.631592	0.954447
TMCO2	0.0895974	1.90496	4.03453	0.0747428	0.784552
AL050341.2	1.34114	-0.353783	2.02014	0.0125584	0.910773
ZMPSTE24	21.7234	0.674363	0.541833	1.60239	0.205565	0.954447
COL9A2	3.92842	3.03651	1.36055	5.16564	0.023038	0.954447
SMAP2	78.64	0.142307	0.315239	0.207708	0.64857	0.954447
AL031985.4	0.0447987	1.58625	4.03887	-0.20282	1
ZFP69B	1.14908	1.61977	2.12556	0.611588	0.434191
AL031985.3	0.107891	0.715992	4.02414	-0.175123	1
ZFP69	1.13439	-1.60765	2.08706	0.774942	0.378692
AL603839.3	0.95917	0.651351	2.2249	0.0802242	0.776994
EXO5	2.31198	-0.293437	1.49353	0.0383392	0.844764
AL603839.1	0
AL603839.2	0
ZNF684	2.94141	0.796959	1.27597	0.393488	0.530472
AL356379.2	0
RIMS3	0.197488	1.27084	4.01709	0.0111778	0.915801
AL031289.2	0
AL031289.1	0.189276	-0.695941	3.99858	0.0452257	0.83159
NFYC-AS1	0.937633	-0.272804	2.24649	0.0555455	0.81368
NFYC	29.8376	-0.0131012	0.48024	0.00553895	0.940673	0.960488
KCNQ4	0.766594	3.4684	2.88686	1.72847	0.188607
CITED4	1.03628	0.165566	2.13926	0.00775838	0.929812
AC119677.1	0
AL391730.2	0
CTPS1	19.624	0.110775	0.615071	0.0693521	0.792282	0.954447
SLFNL1-AS1	1.75497	1.19228	1.85383	0.392471	0.531003
SLFNL1	0
SCMH1	8.25052	-0.274748	0.835481	0.125688	0.722945	0.954447
AC093151.8	0
AC093151.3	0
FOXO6	0
AC093151.2	0
EDN2	0
HIVEP3	21.5234	-0.387245	0.535308	0.617443	0.431999	0.954447
AL445933.2	0
AC119676.1	0
AL158216.1	0
GUCA2B	0
GUCA2A	0
FOXJ3	22.4291	-0.204519	0.559698	0.194554	0.659153	0.954447
AC096540.1	0
RIMKLA	0
ZMYND12	0.615964	-1.35743	2.8497	0.38992	0.532342
PPCS	32.1045	0.515168	0.492371	1.11962	0.29	0.954447
CCDC30	1.26519	2.33641	2.06935	1.34453	0.246236
PPIH	22.9064	-0.674022	0.563902	1.60257	0.20554	0.954447
AC098484.4	0.215781	0.534001	4.00603	-0.0753652	1
AC098484.2	0
YBX1	245.892	-0.174988	0.270565	0.421496	0.516192	0.954447
CLDN19	0
P3H1	7.85486	0.465148	0.820391	0.332478	0.564203	0.954447
C1orf50	16.2682	-0.370984	0.588389	0.414217	0.519837	0.954447
AC098484.1	0
TMEM269	0.0447987	1.58625	4.03887	-0.20282	1
SVBP	18.6948	-0.0256006	0.596239	0.0158139	0.899927	0.954447
ERMAP	0.643071	0.124054	2.75434	0.030901	0.860461
AL512353.1	0.857221	1.2958	2.40226	0.179902	0.671457
ZNF691	1.36362	-0.381009	1.97675	0.0484214	0.825833
SLC2A1	20.405	0.257604	0.526403	0.249071	0.61773	0.954447
SLC2A1-AS1	0.687986	1.75378	2.82003	0.670084	0.413022
AC099795.1	0
FAM183A	0
EBNA1BP2	24.8655	0.0554417	0.520458	0.0389572	0.843534	0.954447
CFAP57	0
TMEM125	0
C1orf210	0
TIE1	0
MPL	0
AL139289.3	0
AL139289.2	0.451524	0.253567	3.19968	-0.0400164	1
CDC20	21.7894	-0.493649	0.730557	0.441817	0.506247	0.954447
ELOVL1	50.2532	0.101209	0.389006	0.0884138	0.766203	0.954447
MED8	24.3432	-0.165932	0.514804	0.132627	0.715723	0.954447
AL139289.1	0
SZT2	7.48952	0.0564211	0.833258	0.0404173	0.840667	0.954447
SZT2-AS1	0.0630919	0.208959	4.03316	-0.311462	1
HYI	3.67508	0.552045	1.3871	0.268363	0.604432	0.954447
HYI-AS1	0
PTPRF	1.82533	-2.72827	1.77346	2.58858	0.107637
KDM4A	11.2144	0.160165	0.707383	0.0514287	0.820596	0.954447
KDM4A-AS1	1.25645	1.04321	2.3296	0.243617	0.621606
ST3GAL3	6.71609	0.169102	0.88486	0.0906317	0.763376	0.954447
AL451062.1	0.0630919	0.208959	4.03316	-0.311462	1
ARTN	0
AL357079.1	1.82886	1.24174	1.74943	0.545521	0.460154
IPO13	6.29092	-0.639802	0.983363	0.418838	0.517517	0.954447
AL357079.2	0.107891	0.715992	4.02414	-0.175123	1
DPH2	4.5905	-0.110271	1.0527	0.0111273	0.91599	0.95462
ATP6V0B	124.377	-0.215274	0.290417	0.55504	0.456266	0.954447
B4GALT2	3.63131	-1.24929	1.31898	0.843294	0.358456	0.954447
CCDC24	1.16841	-0.0484635	1.96367	0.00327488	0.954365
SLC6A9	0.0447987	1.58625	4.03887	-0.20282	1
AL139220.2	0.185003	-0.624923	4.00209	-0.00289437	1
KLF17	0
KLF18	0
DMAP1	22.4374	0.35109	0.555852	0.524447	0.468951	0.954447
ERI3	16.3216	0.69039	0.589315	1.38723	0.238873	0.954447
ERI3-IT1	0
RNF220	26.8404	-0.0328584	0.478144	0.0222843	0.881333	0.954447
TMEM53	4.05332	-0.424423	1.19688	0.139264	0.709014	0.954447
ARMH1	1.44374	0.95305	1.89842	0.313945	0.575269
KIF2C	6.11581	-2.00662	1.04969	3.44409	0.0634783	0.954447
AL592166.1	1.19816	1.6093	2.21208	0.564319	0.452525
RPS8	1610.31	0.0943675	0.234191	0.163033	0.686379	0.954447
BEST4	0.553473	-0.187596	2.90756	0.0440232	0.83381
PLK3	33.8998	0.383832	0.448447	0.78252	0.376371	0.954447
TCTEX1D4	0
BTBD19	0.856983	1.90364	2.53505	0.71411	0.398083
PTCH2	0.360258	-0.745539	3.73997	0.109154	0.741109
EIF2B3	15.0761	0.633128	0.659277	0.985434	0.320861	0.954447
HECTD3	7.18079	-0.722913	0.885004	0.651655	0.419522	0.954447
UROD	16.2004	-0.178915	0.624782	0.0822373	0.774288	0.954447
ZSWIM5	0.643188	1.51402	3.11927	0.493842	0.482218
LINC01144	0
HPDL	0.126184	-0.291738	4.01945	-0.0889138	1
MUTYH	6.94036	-0.25005	0.859323	0.0973835	0.754992	0.954447
TOE1	5.34279	0.128952	0.990033	0.0197738	0.888171	0.954447
TESK2	1.58069	-0.776484	1.86792	0.124485	0.724221
CCDC163	1.12037	-1.29771	2.08638	0.522941	0.46959
MMACHC	0.897224	0.443974	2.62087	0.1039	0.747199
PRDX1	205.619	-0.0548322	0.6955	0.0066251	0.935128	0.958276
AKR1A1	44.854	-0.084094	0.41453	0.0678574	0.794482	0.954447
NASP	90.3208	-0.303954	0.310155	0.951212	0.329411	0.954447
CCDC17	0.985792	3.6355	2.52294	2.46712	0.116251
GPBP1L1	30.2754	-0.438509	0.487359	0.884963	0.346846	0.954447
TMEM69	5.07018	-0.102955	1.03442	0.050236	0.822653	0.954447
IPP	6.76171	-0.610908	0.915696	0.445183	0.504631	0.954447
AL604028.1	0.126184	-0.291738	4.01945	-0.0889138	1
MAST2	7.09877	0.26716	0.902365	0.0955317	0.757259	0.954447
PIK3R3	14.8215	0.378846	0.6268	0.382026	0.536521	0.954447
AL358075.1	0
AL358075.2	0.107891	0.715992	4.02414	-0.175123	1
TSPAN1	0
P3R3URF	0
POMGNT1	8.37432	0.395583	0.798436	0.275012	0.599989	0.954447
LURAP1	0
RAD54L	2.02246	-0.478504	1.5985	0.0906981	0.763292
LRRC41	18.5999	0.632103	0.56411	1.27225	0.259345	0.954447
UQCRH	186.621	-0.0457665	0.258094	0.0435078	0.834772	0.954447
NSUN4	6.2892	-0.273883	1.01528	0.192483	0.660858	0.954447
FAAH	0.0895974	1.90496	4.03453	0.0747428	0.784552
LINC01398	0
DMBX1	0
TMEM275	0.0630919	0.208959	4.03316	-0.311462	1
MKNK1-AS1	0
KNCN	0
MKNK1	11.8967	0.455863	0.758241	0.366476	0.544931	0.954447
MOB3C	3.69583	0.0621613	1.20285	0.00333773	0.953929	0.966629
ATPAF1	18.8917	-0.464905	0.545945	0.744528	0.388214	0.954447
TEX38	0
EFCAB14-AS1	0.0895974	1.90496	4.03453	0.0747428	0.784552
EFCAB14	34.8325	0.413081	0.438009	0.893482	0.344536	0.954447
CYP4B1	0
CYP4A11	0
CYP4X1	0
CYP4Z1	0
CYP4A22-AS1	0
CYP4A22	0
LINC00853	0.614934	1.264	3.18511	0.0133023	0.908179
PDZK1IP1	0
TAL1	0
AL135960.1	0
STIL	5.28161	-1.42495	1.06323	1.9174	0.166143	0.954447
CMPK1	45.129	0.103637	0.378277	0.0753589	0.783688	0.954447
LINC01389	0.0630919	0.208959	4.03316	-0.311462	1
FOXE3	0
FOXD2-AS1	0.936081	0.214325	2.34614	0.0599003	0.806654
FOXD2	0.573436	-0.418131	2.71742	0.0564246	0.812239
LINC01738	0
TRABD2B	0
AL691459.1	0
AC096541.1	0
LINC02794	0
AL356289.1	0
AL109659.1	0
SLC5A9	0
AL109659.2	0
SPATA6	0.508073	-1.70543	3.60555	0.41086	0.521533
AGBL4	0
AL391844.1	0
BEND5	0
AL645507.1	0
AC099788.1	0
AL590432.1	0
AGBL4-IT1	0
ELAVL4	0
AL592182.2	0
AL592182.1	0
LINC02808	0
AL592182.3	0
DMRTA2	0
AL049637.2	0
FAF1	60.1254	-0.205636	0.342831	0.377007	0.53921	0.954447
AL049637.1	0.0447987	1.58625	4.03887	-0.20282	1
CDKN2C	4.82611	-0.468678	1.04389	0.200224	0.65454	0.954447
C1orf185	0
LINC01562	0.38022	-1.32391	3.6488	0.283337	0.594522
RNF11	22.1828	0.31252	0.521525	0.384556	0.535175	0.954447
AL162430.2	0
TTC39A	0.126184	-0.291738	4.01945	-0.0889138	1
TTC39A-AS1	0
EPS15	46.4659	-1.00645	0.433925	5.50283	0.0189857	0.954447
AC104170.2	0
AC104170.1	2.1516	-2.18425	1.66832	1.96137	0.161366
OSBPL9	18.4008	0.269639	0.582065	0.233822	0.628704	0.954447
NRDC	70.322	-0.101176	0.326733	0.111283	0.738689	0.954447
AL050343.2	0
AL050343.3	0
RAB3B	0
TXNDC12	32.3889	0.141087	0.442428	0.111857	0.73804	0.954447
KTI12	1.38586	0.0726372	1.86262	3.6077e-05	0.995208
AL445685.1	0.234074	-0.18891	3.98948	-0.0344282	1
TXNDC12-AS1	0
BTF3L4	18.9075	0.0564687	0.572159	0.0101917	0.919587	0.954901
ZFYVE9	0
CC2D1B	7.78123	-0.568052	0.872437	0.520661	0.47056	0.954447
AL513218.1	0
AL513218.2	0.0447987	1.58625	4.03887	-0.20282	1
ORC1	3.62964	-1.71558	1.31648	1.56053	0.211588	0.954447
PRPF38A	32.5803	0.0149001	0.444126	0.00285234	0.957407	0.968803
TUT4	43.1142	-0.172637	0.389857	0.213944	0.643694	0.954447
AL591167.1	0
GPX7	5.50904	-0.551788	1.037	0.373464	0.541122	0.954447
SHISAL2A	8.26842	0.34891	0.796562	0.19665	0.657439	0.954447
COA7	3.63329	0.187371	1.20785	0.0243945	0.875885	0.954447
ZYG11B	0.916936	-2.12567	2.22366	1.2374	0.265972
ZYG11A	0
AC099677.4	0
ECHDC2	11.6059	0.486728	0.697611	0.497839	0.480451	0.954447
SCP2	53.3096	0.227255	0.364891	0.428469	0.512741	0.954447
PODN	0
AL445183.1	0
SLC1A7	0
AL445183.2	0
CPT2	5.06971	-0.619486	1.03341	0.354196	0.551747	0.954447
AL606760.2	0
CZIB	25.1858	-0.630506	0.502652	1.5473	0.213535	0.954447
AL606760.3	0.189276	-0.695941	3.99858	0.0452257	0.83159
MAGOH	73.2069	0.1253	0.359999	0.129897	0.718539	0.954447
AL606760.1	0
LRP8	9.49429	0.223573	0.835046	0.141797	0.706501	0.954447
AL355483.3	0
AL355483.1	0
AL355483.2	0
LINC01771	0.706279	0.979494	3.01501	0.253526	0.614603
AC119428.2	0
AC119428.1	0
LINC02812	0
DMRTB1	0
GLIS1	0
NDC1	6.23123	-0.326949	0.91204	0.12777	0.720755	0.954447
YIPF1	10.5948	-0.15456	0.778236	0.0401219	0.841242	0.954447
DIO1	0
HSPB11	60.9113	-0.456537	0.347934	1.74241	0.186834	0.954447
LRRC42	5.5472	0.0329871	1.02555	0.00821977	0.92776	0.956441
LDLRAD1	0
TMEM59	143.109	0.0164024	0.287931	0.00334505	0.953879	0.966629
TCEANC2	5.17614	0.356217	1.09735	0.166168	0.68354	0.954447
CDCP2	0
AL357673.2	0
CYB5RL	1.03475	1.12259	2.32726	0.257462	0.611869
MRPL37	25.3345	-0.687132	0.493521	1.89118	0.169069	0.954447
SSBP3	23.0973	-0.313618	0.526193	0.373974	0.540846	0.954447
SSBP3-AS1	0
AL161644.1	0
AL035415.1	0
AC099796.2	0
LINC02784	0
ACOT11	0.305378	0.958972	4.00144	0.000766613	0.977911
FAM151A	0
AL590093.1	0
MROH7	0
TTC4	8.07195	-0.217926	0.822354	0.0790964	0.778526	0.954447
PARS2	0.617205	1.89958	2.85749	0.417256	0.518309
TTC22	1.53927	1.26998	1.8164	0.515743	0.472663
AC096536.1	0
LEXM	0.477897	-1.1493	3.0396	0.310515	0.577364
DHCR24	8.39291	-0.883752	0.826606	1.11207	0.291631	0.954447
AC096536.3	0.170982	0.215295	4.0104	-0.103097	1
AC096536.2	0.0630919	0.208959	4.03316	-0.311462	1
DHCR24-DT	0
AL590440.2	0
TMEM61	0
AL590440.1	0
BSND	0
PCSK9	0
USP24	24.6606	-0.173708	0.507579	0.131236	0.717154	0.954447
MIR4422HG	0.16671	0.421515	4.01557	-0.13967	1
AL603840.1	0
LINC01755	0
LINC01753	0
AL353681.1	0
AC119674.1	0
LINC01767	0
PLPP3	0.59767	-0.826188	3.14809	0.133196	0.715141
PRKAA2	0
FYB2	0
AL360295.1	0
C8A	0
C8B	0
AL161740.1	0
DAB1	0.790752	-1.87024	2.36422	0.910033	0.340106
AL390243.1	0
DAB1-AS1	0
AL445193.2	0
OMA1	4.61217	-0.872849	1.11983	0.619068	0.431394	0.954447
AL035411.3	0.0630919	0.208959	4.03316	-0.311462	1
TACSTD2	0
MYSM1	15.6318	0.00158041	0.629022	0.0213888	0.883725	0.954447
AL136985.3	0.126184	-0.291738	4.01945	-0.0889138	1
JUN	446.646	-0.537572	0.294195	3.32961	0.0680429	0.954447
LINC01135	2.54017	-1.24848	1.52017	0.792848	0.37324
AL136985.2	0
AL136985.1	0
LINC02777	0.496323	0.460125	3.09323	-0.0376876	1
LINC01358	3.0363	0.195893	1.3089	0.0676168	0.794839
AL592431.2	0
AL592431.1	0
AC093425.1	0.234074	-0.18891	3.98948	-0.0344282	1
AC093424.1	0
FGGY	17.471	0.465026	0.574074	0.724978	0.394516	0.954447
AL035416.1	0
HOOK1	0
CYP2J2	0.516887	0.616424	3.00041	0.0398567	0.841761
C1orf87	0
LINC02778	0
LINC01748	0
AC099792.1	0
NFIA	0.152689	1.0347	4.01979	-0.0725279	1
NFIA-AS2	0
NFIA-AS1	0
AC099791.3	0
AC099791.4	0
TM2D1	19.7084	-0.105067	0.538028	0.0384546	0.844533	0.954447
AC099791.2	0.0447987	1.58625	4.03887	-0.20282	1
PATJ	1.40318	-0.62142	1.93972	0.148757	0.699726
L1TD1	0
KANK4	0.0447987	1.58625	4.03887	-0.20282	1
USP1	40.2779	-0.857091	0.415111	4.16378	0.0412972	0.954447
DOCK7	4.08141	1.60503	1.40659	1.28725	0.256555	0.954447
ANGPTL3	0
AC103923.1	0
ATG4C	2.43603	-0.699472	1.46548	0.233245	0.629128
AC099794.1	0
LINC01739	0
AL162400.3	0
AL162400.1	0
AL162400.2	0
AC096543.1	0
LINC00466	0
AC096543.2	0
FOXD3-AS1	0
FOXD3	0.121911	-0.0855153	4.02461	-0.173598	1
ALG6	9.37248	0.475541	0.803821	0.399977	0.527101	0.954447
ITGB3BP	13.1965	0.413236	0.650435	0.477245	0.489673	0.954447
BX004807.1	0.0447987	1.58625	4.03887	-0.20282	1
EFCAB7	2.5449	1.21867	1.37782	0.791214	0.373733
DLEU2L	0.254037	-0.0855153	4.02461	-0.00513642	1
PGM1	24.0258	-0.432982	0.516491	0.74194	0.38904	0.954447
ROR1	0.0447987	1.58625	4.03887	-0.20282	1
ROR1-AS1	0
AL445205.1	0
UBE2U	0
CACHD1	0
RAVER2	0.152689	1.0347	4.01979	-0.0725279	1
JAK1	164.926	0.128006	0.274949	0.236461	0.626774	0.954447
LINC01359	0
AL357078.2	0
AK4	6.54911	0.721767	1.004	0.692336	0.405371	0.954447
DNAJC6	2.81123	-0.505808	1.4428	0.2203
AL139294.1	0.229802	-0.117893	3.993	-0.0627769	1
LEPROT	15.9337	-0.112787	0.699821	0.11495	0.734577	0.954447
LEPR	1.46866	0.418318	1.98508	0.0598981	0.806657
AC119800.1	0.121911	-0.0855153	4.02461	-0.173598	1
AL513493.1	0
PDE4B	142.85	0.168789	0.310565	0.322887	0.569878	0.954447
AL590783.1	0.0630919	0.208959	4.03316	-0.311462	1
SGIP1	0
AL139147.1	0
TCTEX1D1	0
INSL5	0
WDR78	1.01572	-0.217025	2.08767	0.018543	0.891685
AL592161.1	0
MIER1	86.8073	-0.388388	0.310976	1.54635	0.213675	0.954447
SLC35D1	14.0341	0.510351	0.635761	0.677404	0.410482	0.954447
C1orf141	0.0447987	1.58625	4.03887	-0.20282	1
AL133320.2	0.0447987	1.58625	4.03887	-0.20282	1
IL23R	0.0447987	1.58625	4.03887	-0.20282	1
IL12RB2	45.8623	-0.158044	0.530553	0.123959	0.72478	0.954447
SERBP1	199.394	0.021126	0.259014	0.0154722	0.901009	0.954447
LINC01702	0
GADD45A	26.7054	1.24746	0.480724	6.76437	0.00929957	0.666218
GNG12	6.65495	-0.0594883	1.1868	0.0845504	0.771223	0.954447
GNG12-AS1	1.51119	-0.102447	1.98234	0.0300258	0.862432
DIRAS3	0
WLS	0.614934	1.264	3.18511	0.0133023	0.908179
RPE65	0
DEPDC1	3.46934	-0.313695	1.45061	0.0862728	0.76897	0.954447
AL138789.1	0
DEPDC1-AS1	0
AL035412.1	0
AL033530.1	0
AL691520.1	0
LINC01707	0
LINC02791	0
LINC01758	0
AL359894.1	0
LRRC7	0.152689	1.0347	4.01979	-0.0725279	1
AL117353.1	0
AL158840.1	0
LRRC40	7.40802	-0.331411	0.90065	0.224884	0.635343	0.954447
SRSF11	138.574	0.095815	0.28725	0.115845	0.733585	0.954447
AL353771.1	0
ANKRD13C	26.6589	0.0992937	0.522353	0.0821833	0.77436	0.954447
HHLA3	3.16826	2.09999	1.36716	2.38955	0.122149	0.954447
AL158839.1	0
CTH	4.67971	-0.566362	1.05723	0.320959	0.571032	0.954447
AL354872.2	0
LINC01788	0
AL513285.1	0
PTGER3	0.215781	0.534001	4.00603	-0.0753652	1
AL031429.1	0
AL031429.2	0
ZRANB2-AS1	0.0630919	0.208959	4.03316	-0.311462	1
ZRANB2	53.6121	0.185136	0.35565	0.285945	0.592831	0.954447
ZRANB2-AS2	1.01145	-0.156854	2.11742	0.0120681	0.912524
NEGR1	0
AL354949.1	0
NEGR1-IT1	0
AL513166.1	0
AL583808.1	0.121911	-0.0855153	4.02461	-0.173598	1
LINC02796	0
LINC02797	0
LINC01360	0
LINC02238	0
AL591463.1	0
LRRIQ3	0.567494	-0.565743	2.85774	0.116512	0.732849
FPGT	3.42028	0.539374	1.20689	0.206455	0.64956	0.954447
TNNI3K	0
AC093158.1	0
AC105271.1	0
LRRC53	0
ERICH3	1.45817	-1.43742	2.03311	0.344672	0.557145
ERICH3-AS1	0
AC135803.1	0
CRYZ	7.85827	-1.10469	0.883101	1.57328	0.209731	0.954447
TYW3	23.2714	-0.70288	0.513624	1.84309	0.174589	0.954447
AC133865.1	0
AC099786.3	0
AC099786.1	0
LHX8	0
AC099786.2	0
SLC44A5	0.170982	0.215295	4.0104	-0.103097	1
ACADM	24.951	-0.0854965	0.49238	0.0338314	0.854066	0.954447
RABGGTB	20.514	0.264629	0.554785	0.243385	0.621772	0.954447
MSH4	0.170982	0.215295	4.0104	-0.103097	1
ASB17	0
AC092813.1	0
AC092813.2	0
ST6GALNAC3	0.374279	-1.44624	3.63952	0.350539	0.553808
AC104458.1	0
LINC02567	0
ST6GALNAC5	0.0447987	1.58625	4.03887	-0.20282	1
AL035409.1	0
PIGK	9.28605	-0.524004	0.763944	0.463139	0.496161	0.954447
AC093433.2	0
AK5	0.580096	2.43343	3.48134	0.923283	0.336614
AC095030.1	0
AC093575.1	0
AC118549.1	17.0085	0.0445126	0.62028	0.0579133	0.809825	0.954447
USP33	27.058	-0.196088	0.480136	0.205608	0.650232	0.954447
MIGA1	9.43718	-0.132918	0.826583	0.11806	0.731148	0.954447
NEXN-AS1	0
NEXN	0.2746	0.200982	3.83349	-0.0649573	1
FUBP1	43.8441	-0.119563	0.388992	0.0967879	0.755719	0.954447
DNAJB4	8.88043	0.499939	0.921409	0.421299	0.51629	0.954447
GIPC2	0.394976	1.25762	3.63401	0.106521	0.74414
AC103591.3	1.09994	-1.38642	2.25503	0.551739	0.457608
AC103591.4	0
AC096531.2	0
PTGFR	0
IFI44L	72.5448	0.0713945	0.41215	0.0569057	0.811455	0.954447
IFI44	48.2593	0.276963	0.426282	0.483117	0.487014	0.954447
ADGRL4	0.0447987	1.58625	4.03887	-0.20282	1
AL353651.2	0
AL353651.1	0
LINC02792	0
AC099671.1	0
AC098657.2	0
AL606519.1	0
AL136234.1	0
LINC01781	0
AC093154.1	0
ADGRL2	0
AL138799.2	0
AL138799.4	0
AC117944.1	0
AL157944.1	0
LINC01362	0.0447987	1.58625	4.03887	-0.20282	1
LINC01361	0
AC116099.1	0
LINC01712	0
LINC01725	0
AL035706.1	0
TTLL7	0.837258	1.09689	2.51827	0.189316	0.663487
TTLL7-IT1	0
AC104454.2	0
AL359504.2	0.0447987	1.58625	4.03887	-0.20282	1
PRKACB	22.2656	0.886389	0.506509	3.08826	0.0788591	0.954447
SAMD13	0
DNASE2B	0
AL844170.1	0
RPF1	12.9118	0.179487	0.643141	0.0837153	0.772324	0.954447
GNG5	209.725	-0.254641	0.307716	0.684754	0.407954	0.954447
SPATA1	1.14093	-0.907781	2.0676	0.295484	0.586727
CTBS	15.2334	-0.637701	0.621584	1.11047	0.29198	0.954447
AL359762.1	0.170982	0.215295	4.0104	-0.103097	1
AL359762.2	0
LINC01555	0
SSX2IP	3.18103	-0.427929	1.30799	0.117187	0.732106	0.954447
AC104169.1	0
LPAR3	0.603184	2.26341	2.87187	0.71331	0.398347
MCOLN2	40.9458	-0.305162	0.410184	0.568624	0.450806	0.954447
WDR63	1.3244	-0.414916	1.95737	0.114856	0.734682
MCOLN3	0.0895974	1.90496	4.03453	0.0747428	0.784552
SYDE2	0.134396	2.1411	4.03184	0.242436	0.622452
C1orf52	23.2677	-0.245539	0.577671	0.309576	0.577941	0.954447
BCL10	13.437	-0.0910843	0.640047	0.0358324	0.849862	0.954447
AL078459.1	0.319399	0.441523	3.61681	-0.0457174	1
DDAH1	0.254037	-0.0855153	4.02461	-0.00513642	1
AL360219.1	0
AC092807.3	0
AC092807.2	0
CCN1	6.73932	0.329552	1.16216	0.134805	0.713501	0.954447
AC092807.1	0
ZNHIT6	9.46622	-0.492028	0.752206	0.422465	0.515709	0.954447
COL24A1	0
LINC02795	0.0447987	1.58625	4.03887	-0.20282	1
ODF2L	39.9411	0.0607068	0.404816	0.0228485	0.879852	0.954447
CLCA2	0
CLCA1	0
CLCA4	0
CLCA4-AS1	0.0447987	1.58625	4.03887	-0.20282	1
AL049597.2	0.766518	-1.43788	2.55257	0.5284	0.46728
SH3GLB1	69.3666	-0.00563658	0.341118	0.00805154	0.928502	0.956784
AL355981.1	0
SELENOF	80.8971	-0.0898013	0.324133	0.0869984	0.768028	0.954447
HS2ST1	11.6358	0.322479	0.680743	0.225975	0.634524	0.954447
AL121989.1	0
LINC01140	0
LINC02801	0
LMO4	32.7843	-0.132452	0.48524	0.0846373	0.771109	0.954447
LINC01364	0.360898	2.47806	4.02866	0.524002	0.469139
PKN2-AS1	0.394976	1.25762	3.63401	0.106521	0.74414
AL445438.1	0
PKN2	33.9625	-0.371866	0.444475	0.724281	0.394743	0.954447
GTF2B	57.3167	0.145361	0.358585	0.18937	0.663441	0.954447
KYAT3	8.47673	-0.236604	0.799545	0.127471	0.721069	0.954447
RBMXL1	4.83034	0.0850754	1.02574	0.0141988	0.90515	0.954447
GBP3	10.2791	-0.938833	0.738991	1.64584	0.199526	0.954447
GBP1	23.2916	0.25562	0.569109	0.334082	0.563265	0.954447
GBP2	50.0988	-0.116396	0.375153	0.100641	0.751062	0.954447
AC104459.1	0
GBP7	0.0447987	1.58625	4.03887	-0.20282	1
GBP4	25.1975	0.0504764	0.499488	0.0239221	0.877083	0.954447
AC099063.4	2.68515	-1.50108	1.40929	1.20071	0.273181
GBP5	63.229	0.516633	0.34667	2.26379	0.132429	0.954447
AC099063.1	0.107891	0.715992	4.02414	-0.175123	1
GBP6	0
AL596214.1	0.126184	-0.291738	4.01945	-0.0889138	1
LRRC8B	4.36936	-0.614919	1.09751	0.315239	0.574483	0.954447
LRRC8C-DT	2.79047	0.853321	1.39167	0.403665	0.525202
AC093423.2	0.850307	0.0528846	2.47879	0.0392101	0.843033
LRRC8C	21.041	-0.82009	0.54301	2.35759	0.124675	0.954447
AC099568.1	0
AC099568.2	0
LRRC8D	7.46032	-0.362922	0.845784	0.184723	0.667346	0.954447
AL391497.1	0
ZNF326	21.947	-0.213014	0.537106	0.192442	0.660892	0.954447
AL161797.1	0
AC098656.1	0
AL627316.1	0
LINC02787	0
BARHL2	0
AC092805.1	0
LINC02609	0.497859	-1.74932	3.29915	0.506999	0.476441
LINC02788	0
LINC01763	0
AC091614.1	0
ZNF644	76.2967	-0.140306	0.363913	0.173061	0.677405	0.954447
HFM1	0.107891	0.715992	4.02414	-0.175123	1
CDC7	5.80122	-0.250914	1.03297	0.062912	0.801951	0.954447
TGFBR3	55.4649	0.228751	0.431396	0.358808	0.549169	0.954447
BRDT	0.179195	2.32993	4.02997	0.365136	0.545668
EPHX4	0
SETSIP	0.0447987	1.58625	4.03887	-0.20282	1
BTBD8	0.0895974	1.90496	4.03453	0.0747428	0.784552
AC104836.1	0
C1orf146	0
GLMN	21.9977	0.395139	0.5348	0.55515	0.456221	0.954447
RPAP2	25.9897	0.229616	0.482192	0.228492	0.632644	0.954447
GFI1	18.2012	0.216463	0.564614	0.153071	0.695617	0.954447
EVI5	1.91013	0.160278	1.68597	0.0216282	0.883081
RPL5	508.657	0.296451	0.240364	1.5207	0.217514	0.954447
DIPK1A	16.9419	0.00607543	0.598709	0.000457849	0.982929	0.984849
AC093577.1	0.126184	-0.291738	4.01945	-0.0889138	1
MTF2	24.0712	0.0930843	0.504842	0.0365958	0.84829	0.954447
TMED5	37.2933	-0.386594	0.468862	0.797747	0.371768	0.954447
CCDC18	15.3555	-0.987049	0.624058	2.62465	0.105216	0.954447
CCDC18-AS1	32.8293	0.247531	0.445279	0.311314	0.576875	0.954447
DR1	50.2334	-0.370669	0.380344	1.01109	0.314642	0.954447
FNBP1L	0.298835	0.421515	4.01557	-0.0806786	1
BCAR3	7.49255	-2.11697	1.17604	3.48339	0.0619877	0.954447
AL109613.1	0.0447987	1.58625	4.03887	-0.20282	1
AL049796.1	0.179195	2.32993	4.02997	0.365136	0.545668
DNTTIP2	59.3488	0.324554	0.361735	0.839136	0.359644	0.954447
GCLM	22.6471	-0.227368	0.574158	0.250784	0.616524	0.954447
ABCA4	0
AC093579.1	0
ARHGAP29	0
ARHGAP29-AS1	0
AC097059.1	0
AC118469.2	0.107891	0.715992	4.02414	-0.175123	1
ABCD3	6.03858	-0.544108	0.976183	0.314827	0.574733	0.954447
F3	0
AC093117.1	0
SLC44A3	0.121911	-0.0855153	4.02461	-0.173598	1
CNN3	1.89704	2.07065	2.01574	1.00798	0.315388
AC105942.1	0
ALG14	3.62576	-0.431969	1.22747	0.157906	0.691092	0.954447
AC095033.1	0
TLCD4	0
AC092802.3	0
AC092802.1	0
RWDD3	11.5087	0.0306448	0.69877	0.0182954	0.892406	0.954447
AC092802.2	0.121911	-0.0855153	4.02461	-0.173598	1
AC092802.4	0
LINC01760	0
LINC01650	0
AL445218.1	0
LINC01761	0
LINC02607	0
AL683887.1	0
LINC02790	0
LINC01787	0
PTBP2	13.3952	0.0672931	0.648153	0.0204666	0.886242	0.954447
DPYD	38.9587	0.959561	0.423062	5.21299	0.0224187	0.954447
DPYD-AS1	1.13586	1.20286	2.23723	0.394969	0.529699
DPYD-IT1	0
DPYD-AS2	0
MIR137HG	0
BX005019.1	0
AC104453.1	0
LINC01776	0
SNX7	1.82501	-0.119894	2.01388	0.0579069	0.809835
PLPPR5	0
AL445433.2	0
PLPPR4	0
LINC01708	0
PALMD	0
FRRS1	0.595535	-1.46902	2.84461	0.480966	0.487985
AGL	11.9862	-0.00167384	0.694633	0.039092	0.843267	0.954447
AC118553.1	0.0630919	0.208959	4.03316	-0.311462	1
SLC35A3	10.6037	-0.278701	0.766869	0.236751	0.626562	0.954447
MFSD14A	36.3369	-0.166565	0.431187	0.18303	0.668782	0.954447
AC093019.2	1.12918	-0.168371	2.2015	0.0693326	0.792311
SASS6	9.43171	-0.393877	0.775158	0.259047	0.610775	0.954447
TRMT13	9.91646	-0.109295	0.729178	0.0327792	0.856328	0.954447
LRRC39	0.343634	0.743642	3.88392	-0.0972175	1
DBT	3.59641	-0.0374939	1.23866	0.0105531	0.918179	0.954831
AL445928.2	0.0630919	0.208959	4.03316	-0.311462	1
RTCA-AS1	1.02974	-0.607955	2.09666	0.101426	0.750126
RTCA	31.4029	-0.0637218	0.458218	0.0416515	0.838286	0.954447
AC104457.2	0
CDC14A	33.8966	-0.193392	0.47232	0.239537	0.62454	0.954447
AL589990.1	0.107891	0.715992	4.02414	-0.175123	1
GPR88	0.0447987	1.58625	4.03887	-0.20282	1
LINC01349	0
AC099670.3	0
VCAM1	76.7093	0.341261	0.374814	0.844943	0.357987	0.954447
EXTL2	10.5622	0.515178	0.770338	0.495664	0.481411	0.954447
AC104506.1	0.252367	-1.00038	3.98517	0.148159	0.700301
SLC30A7	16.3363	0.0297138	0.622468	0.00259139	0.959401	0.969752
DPH5	6.48726	0.0140752	0.95628	0.0946031	0.758405	0.954447
AC093157.2	0.0447987	1.58625	4.03887	-0.20282	1
AC093157.1	1.1635	-1.19545	2.05498	0.48977	0.48403
AL109741.1	0.189276	-0.695941	3.99858	0.0452257	0.83159
S1PR1	5.10788	-1.35592	1.09115	1.51399	0.218531	0.954447
LINC01307	0
LINC01709	0
OLFM3	0
AC114485.1	0
AC099567.1	0.0630919	0.208959	4.03316	-0.311462	1
COL11A1	0
AC095032.2	0
AC095032.1	0.513587	1.99322	3.05622	0.471876	0.492125
RNPC3	14.5476	0.286478	0.660233	0.193209	0.660259	0.954447
AMY2B	0.134396	2.1411	4.03184	0.242436	0.622452
AMY2A	0
AMY1A	0
AMY1B	0
AMY1C	0
AL591888.1	0
LINC01676	0
LINC01677	0.121911	-0.0855153	4.02461	-0.173598	1
AL355306.2	0
LINC01661	0
PRMT6	2.56992	-0.48094	1.39582	0.173867	0.676697
NTNG1	0
VAV3	11.663	2.63859	0.870474	9.05177	0.00262441	0.28144
VAV3-AS1	0.766594	3.4684	2.88686	1.72847	0.188607
LINC02785	0
SLC25A24	31.6097	-0.482232	0.446728	1.1793	0.277499	0.954447
AL359258.2	1.55265	-0.232596	1.86268	0.0102617	0.919312
NBPF4	0
AL359258.1	0
AL390038.1	0
NBPF6	0
FAM102B	63.3488	-0.171653	0.37791	0.289599	0.590478	0.954447
HENMT1	14.6105	-0.287166	0.619299	0.218894	0.639884	0.954447
AL160171.1	0.360258	-0.745539	3.73997	0.109154	0.741109
PRPF38B	87.8799	-0.079785	0.31147	0.0757699	0.783114	0.954447
FNDC7	0.170982	0.215295	4.0104	-0.103097	1
AL591719.2	0
STXBP3	19.6665	-0.919545	0.572724	2.60092	0.106802	0.954447
AKNAD1	0.394976	1.25762	3.63401	0.106521	0.74414
SPATA42	0
GPSM2	4.84877	-1.4519	1.09851	1.88697	0.169544	0.954447
CLCC1	4.5865	-1.04177	1.20352	0.693189	0.405082	0.954447
WDR47	17.6869	0.076436	0.593253	0.0707507	0.790247	0.954447
TAF13	12.3299	0.761889	0.680424	1.26055	0.261547	0.954447
AL356488.3	0.152689	1.0347	4.01979	-0.0725279	1
TMEM167B	16.965	0.158833	0.570606	0.07818	0.779779	0.954447
AL356488.2	0.323672	0.364948	3.91205	-0.0399752	1
C1orf194	0.0895974	1.90496	4.03453	0.0747428	0.784552
KIAA1324	1.71419	1.67187	1.72847	0.955265	0.328383
SARS	37.7161	0.0471353	0.418687	0.0366763	0.848126	0.954447
CELSR2	0.16671	0.421515	4.01557	-0.13967	1
PSRC1	2.8934	-2.59348	1.54965	2.16927	0.140793
MYBPHL	0
SORT1	5.62585	-0.336276	1.32678	0.0959346	0.756764	0.954447
PSMA5	114.749	-0.145237	0.308214	0.244034	0.621308	0.954447
SYPL2	0
ATXN7L2	2.33037	-0.288419	1.50846	0.0789601	0.778712
CYB561D1	4.20032	-0.116229	1.0779	0.0175775	0.894525	0.954447
AMIGO1	0
GPR61	0
AL355310.3	0
GNAI3	51.9563	-0.200624	0.36504	0.315146	0.574539	0.954447
AL355310.1	0
GNAT2	0
AMPD2	5.03441	0.539794	0.997995	0.293495	0.587989	0.954447
AL355310.2	0
GSTM4	5.57361	0.389415	1.11232	0.189816	0.663069	0.954447
GSTM2	1.27245	-1.74424	2.26737	0.753456	0.385384
GSTM1	0
AC000032.1	0
GSTM5	0
AL158847.1	0
GSTM3	2.61747	0.314517	1.44104	0.112328	0.737509
EPS8L3	0
LINC01768	0.574171	1.71376	3.15095	0.371335	0.542278
AL450468.1	0
AL450468.2	0.0630919	0.208959	4.03316	-0.311462	1
CSF1	205.404	1.1596	0.266162	18.6322	1.58517e-05	0.00441265
AHCYL1	23.077	0.0526733	0.507829	0.013838	0.906357	0.954447
STRIP1	11.1465	0.270741	0.69924	0.192786	0.660608	0.954447
AL160006.1	0.0630919	0.208959	4.03316	-0.311462	1
ALX3	0
LINC01397	0
UBL4B	0
SLC6A17	1.51401	-3.41185	2.25239	2.54096	0.110927
AL355990.1	0
AL355990.2	0
LINC02586	0
KCNC4	0.962587	0.92749	2.29263	0.247302	0.618981
RBM15-AS1	1.70106	-0.0504981	1.77763	0.00153667	0.968731
RBM15	17.9344	-0.483953	0.581279	0.682735	0.408647	0.954447
LAMTOR5-AS1	3.79495	-0.688853	1.16556	0.373378	0.541169	0.954447
SLC16A4	2.36344	0.649556	1.48423	0.249951	0.617109
AL355488.1	0.215781	0.534001	4.00603	-0.0753652	1
LAMTOR5	100.077	0.0693841	0.304628	0.0742794	0.785205	0.954447
PROK1	0
AL358215.1	0
AL358215.2	0
CYMP-AS1	0
KCNA10	0
KCNA2	0.252367	-1.00038	3.98517	0.148159	0.700301
AL365361.1	2.59727	0.830023	1.35788	0.386263	0.53427
KCNA3	14.0107	-0.34403	0.700254	0.338869	0.560483	0.954447
CD53	212.048	0.120002	0.266354	0.203214	0.652139	0.954447
AL360270.2	0.107891	0.715992	4.02414	-0.175123	1
AL360270.1	0.46628	2.10375	3.41418	0.496236	0.481159
LRIF1	16.4848	-0.113712	0.611258	0.034646	0.852339	0.954447
AL360270.3	0.197488	1.27084	4.01709	0.0111778	0.915801
DRAM2	13.648	0.770117	0.655466	1.44271	0.229701	0.954447
CEPT1	6.04826	0.136999	0.924815	0.0342363	0.853205	0.954447
AL355816.1	0
AL355816.2	0.450495	2.88958	3.45111	0.880088	0.348178
DENND2D	24.7729	0.424115	0.525346	0.735286	0.391175	0.954447
CHI3L2	0.0895974	1.90496	4.03453	0.0747428	0.784552
CHIA	0
AL356387.1	0
PIFO	0
OVGP1	0
AL390195.2	0
AL390195.1	0
WDR77	11.7728	0.020735	0.809801	0.00752565	0.93087	0.957236
ATP5PB	113.686	0.161275	0.323275	0.301114	0.583185	0.954447
C1orf162	1.89298	3.57868	2.08267	3.18391	0.0743667
TMIGD3	0.0630919	0.208959	4.03316	-0.311462	1
ADORA3	0
RAP1A	127.66	-0.153766	0.324096	0.226032	0.634482	0.954447
LINC01160	0.215781	0.534001	4.00603	-0.0753652	1
INKA2	2.96625	-1.00482	1.46947	0.587633	0.443336
INKA2-AS1	0
AL049557.1	0.107891	0.715992	4.02414	-0.175123	1
DDX20	5.09224	-0.158316	1.10011	0.0208591	0.885163	0.954447
KCND3	0.375948	-1.25687	3.70236	0.255078	0.613522
KCND3-IT1	0
KCND3-AS1	0
LINC01750	0
AL445426.1	0
CTTNBP2NL	3.46965	0.645992	1.29742	0.403343	0.525368	0.954447
WNT2B	0.599941	0.267818	2.90384	-0.0177905	1
AL354760.1	0.0447987	1.58625	4.03887	-0.20282	1
ST7L	8.5139	-0.174948	0.818943	0.0472424	0.827933	0.954447
CAPZA1	101.539	-0.217634	0.323544	0.449876	0.502394	0.954447
MOV10	8.68925	-0.0272003	0.776338	0.00146284	0.969491	0.975261
AL603832.1	0.423989	1.57357	3.59338	0.228682	0.632503
RHOC	177.761	0.717007	0.298166	5.74757	0.0165115	0.954447
PPM1J	0
AL603832.2	0.0630919	0.208959	4.03316	-0.311462	1
TAFA3	0
LINC01356	0
LINC01357	0
SLC16A1	14.8152	0.0172768	0.642515	0.00219358	0.962644	0.971619
SLC16A1-AS1	8.74417	0.0919017	0.845043	0.0143236	0.904736	0.954447
AL390242.1	0.152689	1.0347	4.01979	-0.0725279	1
LRIG2-DT	1.12037	-1.29771	2.08638	0.522941	0.46959
LRIG2	5.99862	0.429767	0.924339	0.22241	0.63721	0.954447
MAGI3	1.01935	-1.5441	2.35399	0.633931	0.425917
PHTF1	26.9079	-0.0609968	0.482219	0.0177107	0.894129	0.954447
RSBN1	22.5659	0.321848	0.60663	0.362326	0.547217	0.954447
AL137856.1	17.4713	-0.396931	0.705109	0.375919	0.539796	0.954447
PTPN22	196.332	0.209735	0.352966	0.375344	0.540106	0.954447
AP4B1-AS1	1.35504	-0.925601	2.07532	0.316116	0.573951
BCL2L15	0.0630919	0.208959	4.03316	-0.311462	1
AP4B1	12.9049	-0.0113629	0.653765	0.00464522	0.945662	0.963481
DCLRE1B	2.99834	-1.09813	1.45289	0.500111	0.479451
HIPK1-AS1	0.126184	-0.291738	4.01945	-0.0889138	1
HIPK1	28.6476	-0.0788096	0.5131	0.0984802	0.753661	0.954447
OLFML3	0.107891	0.715992	4.02414	-0.175123	1
AL591742.2	0
SYT6	0
AL121999.1	0
TRIM33	34.3424	0.250291	0.447204	0.350645	0.553748	0.954447
BCAS2	51.898	0.337815	0.408932	0.732196	0.392172	0.954447
DENND2C	0.170982	0.215295	4.0104	-0.103097	1
AMPD1	0
NRAS	24.0206	-0.188165	0.489724	0.146593	0.701813	0.954447
CSDE1	86.293	0.26694	0.300427	0.797072	0.37197	0.954447
SIKE1	23.673	-0.105136	0.491969	0.0458961	0.830365	0.954447
SYCP1	0
TSHB	0
TSPAN2	5.7103	-0.585691	0.9927	0.340188	0.559721	0.954447
LINC01765	0.740012	-2.45899	2.7535	1.17151	0.279092
AL049825.1	0
NGF-AS1	0
NGF	0
AL512638.3	0
VANGL1	11.5621	-0.598951	0.685974	0.750924	0.386184	0.954447
CASQ2	0
NHLH2	0
LINC01649	0
SLC22A15	0.107891	0.715992	4.02414	-0.175123	1
AL365318.1	0
MAB21L3	0
LINC01779	0
AL355538.1	0
ATP1A1	33.6944	-0.729301	0.538463	1.74339	0.18671	0.954447
ATP1A1-AS1	3.10303	-2.90298	1.46878	3.36718	0.0665074	0.954447
LINC01762	0.358389	2.85031	4.02588	0.676396	0.41083
AL136376.1	0
AL390066.1	1.07984	-1.54668	2.12712	0.713392	0.39832
AL390066.2	0
CD58	66.6264	-0.321017	0.353185	0.839386	0.359572	0.954447
IGSF3	0.878931	1.50386	2.65236	0.269108	0.603931
C1orf137	0
CD2	427.85	0.187174	0.21722	0.743854	0.388429	0.954447
AL157904.1	0
PTGFRN	0.571165	-1.90593	3.14018	0.617839	0.431851
CD101	0.624894	2.66405	3.10944	1.2168	0.26999
AL445231.1	0.170982	0.215295	4.0104	-0.103097	1
TTF2	13.0439	-0.612178	0.647675	0.932392	0.334242	0.954447
TRIM45	0.0447987	1.58625	4.03887	-0.20282	1
VTCN1	0
LINC01525	0.0630919	0.208959	4.03316	-0.311462	1
AL358072.1	0
MAN1A2	42.3386	-0.033827	0.389649	0.0113497	0.915158	0.95462
AL157902.1	0
TENT5C	150.057	-0.199412	0.344055	0.377736	0.538818	0.954447
GDAP2	14.0882	0.471958	0.637938	0.581965	0.445543	0.954447
WDR3	7.32398	-0.266813	0.910542	0.132485	0.715869	0.954447
SPAG17	0
AL391557.1	0
TBX15	0
AL139420.1	0
AL139420.2	0
WARS2	17.6143	-0.547873	0.603945	0.84533	0.357877	0.954447
WARS2-IT1	0.170982	0.215295	4.0104	-0.103097	1
WARS2-AS1	10.6671	0.602823	0.697345	0.753912	0.38524	0.954447
AL359915.1	0.0447987	1.58625	4.03887	-0.20282	1
LINC01780	0
HAO2	0
HAO2-IT1	0
HSD3B2	0
HSD3B1	0
LINC00622	0
ZNF697	0.360898	2.47806	4.02866	0.524002	0.469139
PHGDH	5.01028	-0.559261	1.07608	0.263704	0.607587	0.954447
HMGCS2	0.254037	-0.0855153	4.02461	-0.00513642	1
REG4	0.0447987	1.58625	4.03887	-0.20282	1
ADAM30	0
NOTCH2	12.6442	-0.403081	0.674163	0.375198	0.540184	0.954447
AC245008.1	0
SEC22B	20.3954	0.273485	0.57813	0.256364	0.612629	0.954447
AC253572.1	0
NBPF26	3.76234	0.400088	1.24055	0.12634	0.722258	0.954447
AC253572.2	8.39809	-0.431346	0.871329	0.359374	0.548854	0.954447
PPIAL4A	0
LINC00623	17.2376	-0.286462	0.593904	0.304013	0.581377	0.954447
FCGR1B	0
AC244453.3	0
AC244453.2	0
AC244453.1	0
FAM72B	2.07393	-1.06102	1.59771	0.514705	0.473109
SRGAP2C	10.8155	0.0463661	0.735736	0.0181453	0.892845	0.954447
SRGAP2-AS1	0.134396	2.1411	4.03184	0.242436	0.622452
LINC02798	5.11167	0.723398	1.07937	0.467362	0.494203	0.954447
AL592494.1	0
AL592494.2	0.0447987	1.58625	4.03887	-0.20282	1
LINC01691	0.643188	1.51402	3.11927	0.493842	0.482218
LINC02799	0
AC239800.2	0.126184	-0.291738	4.01945	-0.0889138	1
LINC02591	1.48363	0.0275672	1.99878	0.0780276	0.779988
HIST2H3PS2	0.0630919	0.208959	4.03316	-0.311462	1
AC246680.1	0
FAM72C	0.0447987	1.58625	4.03887	-0.20282	1
IGKV1OR1-1	0
LINC02802	5.27577	-0.727083	1.1691	0.370255	0.542865	0.954447
PPIAL4E	0
AC246785.3	0.495294	3.03134	3.31932	1.03723	0.308466
NBPF15	10.6098	-0.244638	0.762373	0.211216	0.645816	0.954447
PPIAL4F	0
LINC01632	0
FP700111.1	0
SRGAP2B	6.16147	-0.0119316	0.918708	0.0294338	0.863781	0.954447
FAM72D	0
PPIAL4D	0
AC245014.3	8.26676	-0.671391	0.899206	0.624413	0.429412	0.954447
AC245014.1	0.0447987	1.58625	4.03887	-0.20282	1
NBPF20	2.12394	1.18354	1.60028	0.535869	0.46415
AC239860.4	0
GPR89A	5.91738	-0.621091	0.959428	0.46119	0.497068	0.954447
PDZK1	0.513587	1.99322	3.05622	0.471876	0.492125
CD160	1.2869	2.89292	2.13052	1.86033	0.172586
RNF115	68.3415	0.00670156	0.388397	0.0321738	0.857647	0.954447
POLR3C	17.3223	0.000684591	0.577312	0.0256043	0.872871	0.954447
NUDT17	1.18482	1.53429	2.40837	0.48253	0.487278
PIAS3	4.69069	0.596947	1.07064	0.327817	0.566947	0.954447
ANKRD35	1.80134	1.97648	1.89318	1.12907	0.287975
ITGA10	0.0895974	1.90496	4.03453	0.0747428	0.784552
AC243547.1	0
PEX11B	12.0548	0.531833	0.730077	0.606208	0.436219	0.954447
RBM8A	144.177	0.0510382	0.271907	0.035424	0.85071	0.954447
LIX1L-AS1	3.27982	-2.06628	1.36034	2.40499	0.120949	0.954447
LIX1L	17.6723	-0.0730716	0.572655	0.0457928	0.830553	0.954447
ANKRD34A	0.306914	-1.1698	3.96781	0.190683	0.662349
AC243547.2	0
POLR3GL	53.9638	0.0850443	0.392734	0.06025	0.806101	0.954447
TXNIP	72.3029	-0.383081	0.367052	1.08428	0.297743	0.954447
HJV	0
AC239799.2	1.60481	-1.13484	1.82722	0.514255	0.473302
LINC01719	0.256307	0.976361	4.00851	-0.0355983	1
NBPF10	3.76028	0.248682	1.19073	0.0859855	0.769344	0.954447
NOTCH2NLA	0.42729	0.304507	3.21696	-0.0120098	1
AC239799.1	0
PPIAL4H	0
AC245407.2	0.557746	-0.226353	3.16001	0.0397526	0.841965
NBPF12	3.5788	0.285656	1.19165	0.07825	0.779683	0.954447
AC244394.2	0
PRKAB2	5.89821	0.273313	0.914584	0.0905517	0.763477	0.954447
AC242426.2	3.88853	-0.0214135	1.13674	0.00746803	0.931134	0.957236
FMO5	0.746689	0.0851204	2.58772	0.0371771	0.847105
CHD1L	3.07376	-0.022802	1.30657	0.0347495	0.852122
LINC00624	0.242287	1.45967	4.01522	0.0824983	0.77394
BCL9	2.29034	1.39595	1.57236	0.852357	0.355887
ACP6	8.64146	2.27377	0.862399	6.90562	0.0085925	0.644439
AC241644.1	0
GJA5	0
AC241644.3	0
AC241644.2	0
GJA8	0
GPR89B	5.41371	-0.212146	0.991936	0.0786701	0.779108	0.954447
AC239803.1	0
LINC02804	0
NBPF11	3.69981	0.990631	1.19082	0.704426	0.401301	0.954447
LINC02805	0
AC239809.3	0
LINC01731	0
LINC01138	11.5544	0.0779402	0.687493	0.0331725	0.855478	0.954447
LINC02806	0
AC245100.1	0
AC245100.6	0
PPIAL4G	0
NBPF14	7.09557	-0.230764	0.852418	0.109691	0.740496	0.954447
NOTCH2NLB	0
NUDT4B	0
PDE4DIP	13.41	-0.145302	0.680918	0.0958047	0.756923	0.954447
AC239802.1	0
AC239802.2	0
AC239804.1	0
NBPF9	1.28199	0.711951	2.00318	0.138674	0.709602
AC245297.3	11.7077	0.406388	0.719245	0.426679	0.513623	0.954447
AC245297.2	0.0447987	1.58625	4.03887	-0.20282	1
NOTCH2NLC	1.82286	-0.669472	1.84582	0.224383	0.63572
NBPF19	3.1722	0.90261	1.2763	0.520854	0.470478	0.954447
PPIAL4C	0
AC242842.1	0.468788	1.79699	3.18234	0.357302	0.550008
FCGR1A	0
HIST2H2BF	2.69435	0.589091	1.33171	0.196626	0.657458
AC243772.2	0
HIST2H3D	0.311187	-1.20946	3.92836	0.217914	0.640634
HIST2H4A	0.360898	2.47806	4.02866	0.524002	0.469139
HIST2H3C	0
HIST2H2AA3	0
HIST2H2AA4	0.420746	-0.721809	3.28553	0.113371	0.736339
HIST2H3A	0
HIST2H4B	0
AC239868.1	0.828191	0.248795	2.63563	0.081889	0.774754
HIST2H2BE	1.5329	-2.42448	1.86054	1.93085	0.164665
HIST2H2AC	17.1706	-0.640369	0.616651	1.05689	0.303926	0.954447
HIST2H2AB	1.03047	1.19634	2.17553	0.333646	0.56352
BOLA1	3.23637	-0.401545	1.27524	0.113497	0.736197	0.954447
SV2A	0.993365	1.5123	2.39754	0.480513	0.48819
SF3B4	57.7298	0.491789	0.401088	1.57996	0.208766	0.954447
MTMR11	0.107891	0.715992	4.02414	-0.175123	1
OTUD7B	11.6121	-0.480238	0.766636	0.408885	0.522536	0.954447
AC244033.2	0.317128	-0.854077	3.94825	0.146574	0.701831
VPS45	14.238	0.367055	0.701137	0.339855	0.559913	0.954447
PLEKHO1	41.4857	0.434091	0.397682	1.20549	0.272226	0.954447
AC242988.2	0
ANP32E	78.2622	-0.946773	0.350778	7.04671	0.00794109	0.61896
AC242988.1	0
CA14	5.98453	-0.828921	1.21816	0.454145	0.500373	0.954447
APH1A	54.1533	0.00797691	0.369121	0.00227878	0.961926	0.971096
C1orf54	1.59826	-1.66738	1.81842	1.01018	0.31486
CIART	0
MRPS21	102.792	0.291749	0.331211	0.835019	0.360825	0.954447
PRPF3	14.973	0.343261	0.606031	0.32261	0.570043	0.954447
RPRD2	23.8459	-0.0516532	0.496404	0.0109785	0.916552	0.95462
TARS2	6.85082	0.160772	0.887607	0.0720065	0.788437	0.954447
ECM1	2.83394	-0.0790971	1.62356	0.0808126	0.776199
FALEC	0.580096	2.43343	3.48134	0.923283	0.336614
AL356356.1	0.350177	1.11824	3.80863	0.0503809	0.822402
ADAMTSL4	0.36847	0.552829	3.71468	-0.018259	1
ADAMTSL4-AS1	10.5384	0.576487	0.932423	0.4848	0.486256	0.954447
MCL1	248.539	0.0406165	0.261747	0.0411082	0.839329	0.954447
ENSA	112.499	-0.179788	0.314186	0.330028	0.565642	0.954447
GOLPH3L	4.88263	0.715365	1.00655	0.509626	0.475301	0.954447
HORMAD1	0
CTSS	51.389	0.664956	0.37475	3.16041	0.0754441	0.954447
CTSK	0.268792	2.62382	4.02749	0.544442	0.460598
ARNT	14.1716	-0.608478	0.631155	0.951157	0.329425	0.954447
CTXND2	0
SETDB1	7.2357	-0.319678	0.886649	0.168067	0.681836	0.954447
CERS2	33.2065	-0.291688	0.431112	0.461853	0.496759	0.954447
AL590133.2	0
AL590133.1	0.121911	-0.0855153	4.02461	-0.173598	1
ANXA9	0.0895974	1.90496	4.03453	0.0747428	0.784552
MINDY1	2.37141	1.64387	1.45754	1.27256	0.259286
PRUNE1	2.48991	1.08886	1.42178	0.635543	0.425329
BNIPL	0.0895974	1.90496	4.03453	0.0747428	0.784552
C1orf56	0.341965	-0.178658	3.82601	-0.00626689	1
CDC42SE1	82.7996	0.110604	0.33191	0.130207	0.718217	0.954447
MLLT11	3.807	2.51383	1.34893	3.59999	0.05778	0.954447
GABPB2	7.41783	0.0593176	0.82806	0.0107042	0.917597	0.95462
AL592424.1	0
SEMA6C	0
TNFAIP8L2	2.7549	-1.0544	1.41261	0.50988	0.475191
SCNM1	35.6	-0.26531	0.427761	0.390521	0.532026	0.954447
LYSMD1	0.0895974	1.90496	4.03453	0.0747428	0.784552
TMOD4	0
VPS72	17.4683	0.555727	0.595239	0.934127	0.333793	0.954447
PIP5K1A	10.7995	-0.18686	0.756872	0.103674	0.747465	0.954447
PSMD4	84.3337	0.00185913	0.330123	0.0260596	0.871755	0.954447
ZNF687-AS1	1.38526	-1.35155	2.03003	0.452067	0.501355
ZNF687	0.985036	-0.33435	2.36294	0.0927407	0.760721
PI4KB	13.1555	-0.396827	0.710966	0.413995	0.519949	0.954447
AL391069.3	0
RFX5	15.4707	0.275979	0.606191	0.235801	0.627256	0.954447
AL391069.1	0
AL391069.2	0.26058	0.770144	4.00332	-0.0381966	1
SELENBP1	0.826443	0.62969	2.45748	0.02944	0.863767
PSMB4	71.0166	-0.0578111	0.338895	0.0550357	0.814522	0.954447
POGZ	20.1558	-0.814748	0.590816	2.03139	0.15408	0.954447
CGN	0
TUFT1	0.331884	1.75658	3.8917	0.218033	0.640543
AL365436.2	0.121911	-0.0855153	4.02461	-0.173598	1
SNX27	11.8216	-0.935685	0.697179	1.84865	0.173941	0.954447
AL391335.1	0
CELF3	0
AL589765.1	0
RIIAD1	0
AL589765.7	0
MRPL9	36.0748	-0.231788	0.431174	0.30219	0.582513	0.954447
OAZ3	0.69859	0.76652	2.53033	0.0642415	0.799914
AL589765.4	0
AL589765.2	0
AL589765.5	0
TDRKH	1.75654	1.92639	1.91468	1.04644	0.306329
TDRKH-AS1	1.10001	1.67225	2.34007	0.53265	0.465495
AL589765.6	0
LINGO4	0
RORC	0
C2CD4D	0.0630919	0.208959	4.03316	-0.311462	1
[truncated: 34,602 more rows]

## Sheet: Spleen_Bulk_Liver_Bulk
	baseMean	log2FoldChange	lfcSE	stat	pvalue	padj
MIR1302-2HG	0
FAM138A	0
OR4F5	0
AL627309.1	0
AL627309.3	0
AL627309.2	0
AL627309.5	0.104841	2.19459	4.49154	0.118169	0.731028	1
AL627309.4	0
AP006222.2	0
AL732372.1	0
OR4F29	0
AC114498.1	0
OR4F16	0
AL669831.2	0
LINC01409	3.32191	0.0251532	1.56653	0.0430223	0.835683	1
FAM87B	0
LINC01128	4.35556	-0.146329	1.34432	0.0149198	0.902783	1
LINC00115	1.03671	-0.461555	2.62709	0.0598872	0.806674	1
FAM41C	0.510032	0.637575	3.9638	-0.00748737	1	1
AL645608.6	0
AL645608.2	0
AL645608.4	0
LINC02593	0
SAMD11	0.0750874	0.138414	4.54281	-0.186185	1	1
NOC2L	23.0782	-0.606458	0.65883	0.852948	0.35572	1
KLHL17	6.39653	0.179277	1.11936	0.0396125	0.84224	1
PLEKHN1	3.75963	1.37897	1.42882	0.978215	0.32264	1
PERM1	0.377211	-0.91864	4.50647	0.132792	0.715554	1
AL645608.7	0.377211	-0.91864	4.50647	0.132792	0.715554	1
HES4	28.4361	-6.29937	1.31809	28.0743	1.16747e-07	5.23713e-05
ISG15	448.549	-2.25679	0.371645	32.496	1.19436e-08	7.739e-06
AL645608.1	0.525612	-1.73593	4.3918	0.291876	0.589021	1
AGRN	1.90906	-2.21357	2.14066	1.17154	0.279084	1
AL645608.5	0
AL645608.8	0
RNF223	0
C1orf159	4.07009	0.495983	1.38656	0.138237	0.71004	1
AL390719.3	0.314524	3.06619	4.46692	0.623672	0.429686	1
LINC01342	0
AL390719.2	0
TTLL10-AS1	0
TTLL10	0
TNFRSF18	6.16602	-1.67906	1.47079	1.39663	0.237289	1
TNFRSF4	6.82422	-3.66831	1.60447	3.66077	0.0557078	0.612443
SDF4	68.8173	-1.03933	0.438669	5.55923	0.0183835	0.348807
B3GALT6	8.23915	-0.774834	1.03054	0.597755	0.439436	1
C1QTNF12	0.604247	-1.76418	4.23237	0.299888	0.583952	1
AL162741.1	0
UBE2J2	25.9441	0.186918	0.610544	0.0994271	0.752518	1
LINC01786	0
SCNN1D	0.28477	1.85029	4.46161	0.14115	0.70714	1
ACAP3	13.9751	1.26825	0.79443	2.65475	0.103241	0.785385
PUSL1	4.57518	0.0413294	1.39082	0.00811378	0.928226	1
INTS11	29.6082	-0.450278	0.60087	0.624648	0.429325	1
AL139287.1	0
CPTP	8.72803	0.285357	1.0161	0.0912595	0.762582	1
TAS1R3	0
DVL1	2.18582	0.377342	1.96582	0.0397127	0.842043	1
MXRA8	0.104841	2.19459	4.49154	0.118169	0.731028	1
AURKAIP1	106.097	-0.780224	0.409275	3.62307	0.0569836	0.61425
CCNL2	31.0296	0.880666	0.566518	2.49318	0.11434	0.815817
MRPL20-AS1	5.68089	-0.399719	1.1987	0.120402	0.728599	1
MRPL20	63.4436	-0.63302	0.435363	2.07837	0.1494	0.905979
AL391244.2	0
ANKRD65	0
AL391244.1	0
TMEM88B	0
LINC01770	0
VWA1	0.150175	-0.361124	4.53071	-0.0284176	1	1
ATAD3C	0
ATAD3B	8.54588	-0.15048	1.03503	0.030306	0.861798	1
ATAD3A	7.49696	-0.0964501	1.08994	0.0109363	0.916712	1
TMEM240	0
SSU72	68.9177	-1.02146	0.473865	4.64953	0.031062	0.465824
AL645728.1	0.480278	-0.131908	4.08211	0.00561153	0.940286	1
FNDC10	2.70633	-3.98313	2.15726	3.42592	0.0641804	0.652811
AL691432.4	0.406965	1.02721	4.42133	-0.0762033	1	1
AL691432.2	1.01509	0.449186	2.73097	0.0341713	0.853343	1
MIB2	28.6368	0.507878	0.583988	0.787684	0.374801	1
MMP23B	0.629049	3.72898	3.99397	1.20732	0.271863	1
CDK11B	25.2758	0.870496	0.613498	2.09105	0.148164	0.901923
FO704657.1	1.4417	3.15244	2.57679	1.14752	0.284068	1
SLC35E2B	14.0726	1.38881	0.785322	3.22435	0.0725505	0.689072
CDK11A	24.7558	0.631256	0.651841	1.02988	0.310188	1
SLC35E2A	8.13848	2.08845	1.11488	3.79782	0.0513195	0.594986
NADK	14.0748	0.334737	0.836263	0.163339	0.686101	1
GNB1	129.293	0.34879	0.353956	0.997528	0.317909	1
AL109917.1	0.0750874	0.138414	4.54281	-0.186185	1	1
CALML6	0
TMEM52	0.0750874	0.138414	4.54281	-0.186185	1	1
CFAP74	0
AL391845.2	0
GABRD	0
AL391845.1	0
PRKCZ	6.38424	0.194494	1.19144	0.0701887	0.791062	1
AL590822.2	0
PRKCZ-AS1	0
FAAP20	47.8258	-0.625601	0.487497	1.68082	0.194816	0.982222
AL590822.1	0
SKI	55.0323	-0.653859	0.531858	1.40576	0.235761	1
AL590822.3	0.150175	-0.361124	4.53071	-0.0284176	1	1
MORN1	1.2832	-0.506455	2.50735	0.0941314	0.758989	1
AL589739.1	0.0750874	0.138414	4.54281	-0.186185	1	1
AL513477.2	0
RER1	61.0245	-0.418059	0.484297	0.810266	0.368042	1
PEX10	5.80666	-1.04649	1.24714	0.670688	0.412812	1
PLCH2	4.87031	0.52705	1.33668	0.17612	0.674729	1
AL139246.1	0
AL139246.4	0
PANK4	6.70241	0.772354	1.11721	0.516471	0.472351	1
HES5	0
AL139246.5	6.94108	-0.556473	1.10026	0.278609	0.597614	1
TNFRSF14-AS1	7.2956	0.36661	1.07557	0.136107	0.712182	1
TNFRSF14	49.2386	-0.228817	0.467842	0.23765	0.625909	1
AL139246.3	1.62163	2.58265	2.2746	1.17624	0.278123	1
PRXL2B	6.02707	1.27476	1.22329	1.21604	0.27014	1
MMEL1	0.302123	-0.160642	4.53514	0.0265477	0.87057	1
AL831784.1	0
TTC34	0
AC242022.2	0
AC242022.1	0
AL592464.2	0
AL592464.3	0
AL592464.1	0
AL589702.1	0
ACTRT2	0
PRDM16-DT	0
PRDM16	0
AL008733.1	0
AL590438.1	0
AL354743.2	0
AL354743.1	0
ARHGEF16	0
AL512413.1	0
MEGF6	0.300349	-1.0644	4.50102	0.132568	0.715785	1
AL513320.1	0
TPRG1L	10.6795	0.56477	0.8828	0.419692	0.517091	1
WRAP73	13.9658	-0.131966	0.81713	0.0316688	0.858757	1
TP73	3.9359	0.654955	1.56709	0.180505	0.670939	1
AL136528.1	0.104841	2.19459	4.49154	0.118169	0.731028	1
AL136528.2	0
CCDC27	0
SMIM1	0.586894	0.839053	3.46749	-0.021818	1	1
LRRC47	14.9798	-0.277124	0.834272	0.143683	0.704647	1
AL365330.1	0
CEP104	14.0756	0.0465637	0.826068	0.00923811	0.923429	1
DFFB	3.10568	1.52282	1.57141	0.97006	0.324665	1
C1orf174	9.2679	-0.781628	1.04535	0.652827	0.419104	1
LINC01134	0.0750874	0.138414	4.54281	-0.186185	1	1
LINC01346	0
LINC01345	0
LINC02780	0.0750874	0.138414	4.54281	-0.186185	1	1
AL805961.1	0
LINC01777	0
AL355602.1	0
Z98747.1	0
LINC01646	0
AJAP1	0
Z98886.1	0
BX005132.1	0
LINC02781	0
LINC02782	0
AL139823.1	0
Z98259.3	0
Z98259.2	0
Z98259.1	0
AL365255.1	0.913819	3.23912	3.14968	1.3521	0.244911	1
NPHP4	3.29427	-1.37707	1.73285	0.722765	0.395238	1
KCNAB2	80.6454	0.97993	0.432308	5.26548	0.0217524	0.383627
CHD5	0.82505	3.55103	3.70917	1.34627	0.245932	1
RPL22	339.115	-0.39552	0.303974	1.68868	0.193776	0.980346
AL031847.1	0
RNF207	0.62548	-0.54194	3.31783	0.0795064	0.777967	1
ICMT	14.3728	-0.297632	0.794891	0.177853	0.673225	1
LINC00337	0.150175	-0.361124	4.53071	-0.0284176	1	1
HES3	0
GPR153	3.81703	-1.48776	1.57962	0.926028	0.335897	1
ACOT7	39.5546	-0.903595	0.596073	2.10481	0.146837	0.898818
AL031848.2	0.302123	-0.160642	4.53514	0.0265477	0.87057	1
HES2	0
ESPN	0.452298	-1.37925	4.22285	0.221091	0.63821	1
AL031848.1	0
TNFRSF25	5.50334	-0.852496	1.30636	0.471172	0.492448	1
PLEKHG5	0.104841	2.19459	4.49154	0.118169	0.731028	1
NOL9	14.9801	0.470108	0.775911	0.401317	0.52641	1
TAS1R1	0
ZBTB48	10.403	0.90551	0.969001	0.968955	0.324941	1
KLHL21	5.94128	-0.0861127	1.19266	0.0110753	0.916186	1
PHF13	3.77541	-0.197788	1.44598	0.0186292	0.891435	1
THAP3	4.07207	-0.36339	1.44502	0.112408	0.737419	1
DNAJC11	6.83306	-0.0942056	1.10286	0.0307545	0.860789	1
LINC01672	0
AL591163.1	0.104841	2.19459	4.49154	0.118169	0.731028	1
CAMTA1-DT	1.09018	0.280516	2.65846	0.0252082	0.873849	1
CAMTA1	31.2912	-0.165105	0.571121	0.106468	0.744202	1
AL512330.1	0
CAMTA1-IT1	0
Z97987.1	0
AL365194.1	0
AL359881.3	0
AL359881.2	0
AL359881.1	0
VAMP3	18.5533	-0.17711	0.757788	0.0678134	0.794548	1
Z98884.2	0
PER3	2.08524	0.197311	1.95106	0.0293757	0.863914	1
Z98884.1	0
UTS2	0.655234	0.229682	3.25258	-0.00606292	1	1
TNFRSF9	63.486	-1.0895	0.447613	5.67146	0.0172431	0.336979
PARK7	217.662	-1.34166	0.380319	11.9592	0.000543768	0.03563
AL034417.4	0
AL034417.3	0
ERRFI1	1.90283	-0.0315222	2.02545	0.0386518	0.84414	1
AL034417.2	0
LINC01714	0
AL358876.2	0
SLC45A1	0.222776	-0.699681	4.51566	0.0337107	0.854324	1
RERE	27.0708	1.18179	0.626637	3.69111	0.0547031	0.606868
RERE-AS1	0.104841	2.19459	4.49154	0.118169	0.731028	1
AL357552.2	0
ENO1	270.983	-0.392804	0.295616	1.74618	0.186358	0.969759
ENO1-AS1	0.150175	-0.361124	4.53071	-0.0284176	1	1
CA6	1.72519	3.80635	2.65548	2.31244	0.128342	0.866854
SLC2A7	0
SLC2A5	0
GPR157	0
MIR34AHG	3.16211	1.11502	1.63829	0.552937	0.45712	1
LNCTAM34A	0.88227	-0.229264	2.74353	0.0225151	0.880725	1
H6PD	6.06873	1.47809	1.14074	1.74672	0.186289	0.969691
SPSB1	11.7605	2.33135	0.918175	6.61952	0.0100867	0.251735
BX323043.1	0
LINC02606	0
AL928921.1	0
SLC25A33	11.489	-2.31685	1.02382	5.27355	0.0216518	0.383116
TMEM201	0.914511	0.312972	2.68497	0.000675101	0.979271	1
PIK3CD	69.587	1.09957	0.409908	7.40192	0.00651544	0.194851
PIK3CD-AS1	0.28477	1.85029	4.46161	0.14115	0.70714	1
PIK3CD-AS2	3.19493	-1.10034	2.01011	0.237567	0.625969	1
CLSTN1	40.0578	0.658748	0.507386	1.74301	0.186757	0.970074
CTNNBIP1	18.5286	0.36656	0.707211	0.303797	0.581512	1
AL357140.1	0
AL357140.4	0
LZIC	20.9669	-0.188201	0.668061	0.0808983	0.776084	1
AL357140.2	0
NMNAT1	2.13502	0.464203	2.02972	0.0954575	0.757351	1
AL603962.1	0
RBP7	0
UBE4B	28.1396	0.429763	0.657157	0.500188	0.479418	1
KIF1B	22.7489	0.508299	0.745989	0.521754	0.470095	1
AL139424.3	0
AL139424.2	0
PGD	34.2891	-1.64334	0.605111	7.29318	0.00692167	0.201824
AL139424.1	0.150175	-0.361124	4.53071	-0.0284176	1	1
CENPS	6.47093	-2.04624	1.28495	2.633	0.104664	0.789603
CORT	0.0750874	0.138414	4.54281	-0.186185	1	1
DFFA	13.6389	-1.81648	0.94096	3.82271	0.0505625	0.590515
AL354956.1	0
PEX14	27.9377	0.632151	0.596599	1.19145	0.275038	1
AL139423.2	0.0750874	0.138414	4.54281	-0.186185	1	1
CASZ1	12.3359	-0.95963	0.947692	1.13014	0.287746	1
AL139423.1	0.104841	2.19459	4.49154	0.118169	0.731028	1
C1orf127	0.0750874	0.138414	4.54281	-0.186185	1	1
TARDBP	25.8846	0.0535814	0.620465	0.0218373	0.882521	1
MASP2	0.104841	2.19459	4.49154	0.118169	0.731028	1
AL109811.2	0.28477	1.85029	4.46161	0.14115	0.70714	1
SRM	30.1053	-1.36811	0.618681	4.8569	0.0275358	0.436754
EXOSC10	25.3924	-0.157003	0.662229	0.073011	0.787002	1
AL109811.1	0.929891	3.8897	3.21839	1.89	0.169202	0.934111
EXOSC10-AS1	0.377211	-0.91864	4.50647	0.132792	0.715554	1
MTOR	16.085	0.745765	0.729631	1.07365	0.300122	1
MTOR-AS1	0
ANGPTL7	0
UBIAD1	6.3399	-1.41653	1.24917	1.37216	0.241441	1
AL031291.1	0
DISP3	0
AL590989.1	0
LINC01647	0
AL031731.1	0
FBXO2	4.50713	-1.34717	1.46266	0.778625	0.377562	1
FBXO44	13.5817	0.461922	0.838406	0.354209	0.55174	1
FBXO6	20.4601	-0.164684	0.724077	0.0533625	0.817312	1
MAD2L2	33.3969	-1.32855	0.602922	4.91021	0.0266984	0.429704
DRAXIN	0.675074	-2.01246	3.3023	0.570655	0.449999	1
AGTRAP	37.1911	-1.15288	0.546025	4.36462	0.0366927	0.513673
C1orf167	0
AL953897.1	0
MTHFR	9.02493	1.18782	0.951833	1.61713	0.203493	0.995187
CLCN6	2.62946	-0.101252	1.76457	0.025789	0.872417	1
NPPA	0
NPPB	0
AL021155.5	3.06453	-1.99861	1.90835	0.634385	0.425751	1
KIAA2013	26.9414	-0.420597	0.634747	0.500483	0.479288	1
PLOD1	11.6537	-0.481032	0.867863	0.306691	0.579718	1
AL096840.2	0
MFN2	5.83535	0.135554	1.18803	0.0334922	0.854791	1
MIIP	29.7458	0.563115	0.661422	0.773375	0.379175	1
TNFRSF8	25.2233	3.32218	1.68522	3.74931	0.0528294	0.599384
AL357835.1	0
TNFRSF1B	217.234	-0.890094	0.34672	6.21168	0.012691	0.283832
VPS13D	27.128	1.16958	0.589521	4.05927	0.0439295	0.560574
LINC02766	0
DHRS3	0.302123	-0.160642	4.53514	0.0265477	0.87057	1
AC254633.1	0
AADACL4	0
AADACL3	0
C1orf158	0
PRAMEF12	0
PRAMEF1	0
LINC01784	0
PRAMEF11	0
HNRNPCL1	0
PRAMEF2	0
PRAMEF4	0
PRAMEF10	0
PRAMEF7	0
PRAMEF6	0
PRAMEF27	0
HNRNPCL3	0
PRAMEF25	0
HNRNPCL2	0
AC245056.1	0
PRAMEF26	0
HNRNPCL4	0
PRAMEF9	0
PRAMEF13	0
PRAMEF18	0
PRAMEF5	0
PRAMEF8	0
PRAMEF33	0
PRAMEF15	0
AC243961.1	0
PRAMEF14	0
PRAMEF19	0
PRAMEF17	0
PRAMEF20	0
LRRC38	0
AL354712.1	0
PDPN	0
AL359771.1	0
PRDM2	46.3891	0.572	0.504764	1.35901	0.243709	1
KAZN	1.91332	-2.18381	2.23547	1.05279	0.304865	1
AL357873.1	0
KAZN-AS1	0.104841	2.19459	4.49154	0.118169	0.731028	1
AL031293.1	0
TMEM51-AS1	0
TMEM51	0.147688	-0.160642	4.53514	-0.0797122	1	1
C1orf195	0
FHAD1	0.464699	1.69746	4.11835	0.158424	0.690612	1
AL031283.2	0.150175	-0.361124	4.53071	-0.0284176	1	1
AL031283.3	0
AL031283.1	0.28477	1.85029	4.46161	0.14115	0.70714	1
EFHD2	241.043	0.244109	0.365538	0.467758	0.49402	1
CTRC	0.82505	3.55103	3.70917	1.34627	0.245932	1
CELA2A	0
CELA2B	0
CASP9	7.05476	-0.728441	1.11897	0.452214	0.501285	1
DNAJC16	5.25926	0.927665	1.21458	0.601957	0.437832	1
AL121992.3	0
AGMAT	2.41146	1.80881	1.75179	1.09614	0.295114	1
AL121992.1	0.25253	1.02643	4.47033	-0.0429221	1	1
DDI2	11.6185	0.571912	0.851777	0.461414	0.496964	1
RSC1A1	0
AL121992.2	0
PLEKHM2	21.3092	0.349311	0.67246	0.278262	0.597842	1
AL450998.3	0
SLC25A34	0
SLC25A34-AS1	0.302123	-0.160642	4.53514	0.0265477	0.87057	1
TMEM82	0
FBLIM1	0.5975	-1.80141	3.82613	0.373011	0.541368	1
UQCRHL	9.66249	-4.01284	1.31326	9.45725	0.00210316	0.0898894
AL450998.2	4.23583	-0.901252	1.41302	0.380302	0.537442	1
SPEN	39.0268	0.162513	0.524986	0.113057	0.73669	1
ZBTB17	14.6656	0.142225	0.806116	0.0948247	0.758131	1
SRARP	0
AL355994.3	0
HSPB7	0.604247	-1.76418	4.23237	0.299888	0.583952	1
CLCNKA	0
CLCNKB	0
FAM131C	0
EPHA2	0
AL451042.2	0
AL451042.1	0
ARHGEF19-AS1	0
ARHGEF19	4.32738	0.706572	1.33796	0.314171	0.575132	1
AL109627.1	0.295376	-0.982147	4.50403	0.0965575	0.756001	1
CPLANE2	0.987112	0.1556	2.63087	-0.00175971	1	1
FBXO42	15.1468	0.579527	0.749222	0.62209	0.430272	1
SZRD1	39.3173	-0.178795	0.533151	0.145253	0.703114	1
SPATA21	0.609901	1.0954	3.72167	0.0560999	0.81277	1
NECAP2	37.3207	0.00383971	0.519897	0.00100317	0.974733	1
LINC01772	0.511806	1.56511	4.02836	-0.0352544	1	1
AL137802.2	0.104841	2.19459	4.49154	0.118169	0.731028	1
AL137802.1	0
LINC01783	0
NBPF1	3.21984	1.42986	1.55983	0.907548	0.340766	1
AL137798.1	0
AL137798.2	0
AL021920.1	0
AL021920.3	0
CROCC	11.0988	0.310857	0.914612	0.170124	0.680001	1
BX284668.1	0
BX284668.2	0
BX284668.5	0.929891	3.8897	3.21839	1.89	0.169202	0.934111
BX284668.6	0.405191	0.120377	4.36396	-0.0208073	1	1
MFAP2	1.20849	-2.78283	3.3329	0.851961	0.355998	1
AL049569.2	0
AL049569.1	0
ATP13A2	11.1333	0.458195	0.895229	0.269687	0.603542	1
SDHB	39.9955	-0.342514	0.558235	0.430286	0.511849	1
PADI2	0
LINC02783	0
AL590644.1	0
PADI1	0
PADI3	0
PADI4	0
PADI6	0
RCC2-AS1	0
RCC2	25.3248	0.0263495	0.611772	0.00200641	0.964272	1
ARHGEF10L	0
LINC02810	0
ACTL8	0
AL357509.1	0
LINC01654	0
IGSF21	0
IGSF21-AS1	0
AL591896.1	0
KLHDC7A	0
PAX7	0
TAS1R2	0
ALDH4A1	2.30802	-0.11277	1.85976	0.0154069	0.901217	1
IFFO2	23.7447	1.0607	0.661652	2.68644	0.101206	0.781374
AL137127.1	0.482052	0.287552	3.74722	-0.033219	1	1
UBR4	45.7299	0.240804	0.503881	0.241817	0.622897	1
EMC1-AS1	4.83156	1.26942	1.33757	0.998962	0.317562	1
EMC1	6.16336	0.365511	1.16621	0.116245	0.733143	1
MRTO4	10.8055	-0.706676	1.0778	0.436939	0.508603	1
AKR7A3	0.900137	2.58252	3.31992	0.890097	0.345451	1
AKR7A2	17.8103	-1.58584	0.790899	4.03141	0.0446607	0.561731
SLC66A1	3.87506	0.183645	1.62997	0.0756973	0.783215	1
CAPZB	244.437	-0.363889	0.314871	1.33103	0.248621	1
MICOS10	98.7724	-0.61104	0.383787	2.50053	0.113808	0.815722
AL031727.2	0.96619	-2.59716	3.12332	0.904277	0.341637	1
NBL1	26.0657	-3.12175	0.817613	13.8862	0.000194224	0.0173364
HTR6	0
TMCO4	7.47947	0.100155	1.0503	0.0338624	0.854	1
RNF186	0
AL391883.1	0
OTUD3	5.751	-0.418856	1.20531	0.127993	0.720522	1
PLA2G2E	0
PLA2G2A	0
PLA2G5	0
PLA2G2D	0.222776	-0.699681	4.51566	0.0337107	0.854324	1
PLA2G2F	0
Z98257.1	0
PLA2G2C	0.357371	1.55122	4.4538	0.0618671	0.803569	1
UBXN10-AS1	0.582633	0.418462	3.41104	-0.00705886	1	1
UBXN10	1.28726	3.15399	2.61772	1.53344	0.215597	1
LINC01757	0
Z98257.2	0
VWA5B1	0
AL020998.1	0
LINC01141	0
AL139254.1	0
AL139254.2	0
AL139254.3	0
CAMK2N1	0.580147	0.465338	3.44078	-0.0116316	1	1
MUL1	9.59327	-0.400443	0.961946	0.198906	0.655605	1
FAM43B	0
CDA	0.377211	-0.91864	4.50647	0.132792	0.715554	1
PINK1	7.00603	0.016474	1.10372	0.00146156	0.969504	1
PINK1-AS	0.644628	1.55805	3.60063	0.195397	0.658462	1
DDOST	57.7175	-0.702974	0.499198	2.06392	0.150822	0.907369
KIF17	1.73142	0.0125267	2.74725	0.0341209	0.85345	1
SH2D5	0
AL663074.1	0
HP1BP3	139.76	0.00104312	0.339907	0.000279259	0.986667	1
EIF4G3	95.2555	1.18805	0.376728	10.195	0.00140822	0.0696772
AL031005.2	0.0750874	0.138414	4.54281	-0.186185	1	1
ECE1	30.5356	0.469127	0.559826	0.714825	0.397847	1
AL031005.1	0
AL031728.1	0.179929	1.3255	4.47811	-0.021884	1	1
AL592309.2	0
NBPF3	1.46968	2.54168	2.44507	1.19701	0.27392	1
ALPL	0
LINC02596	0
RAP1GAP	0.892876	-2.41043	3.31887	0.716061	0.397439	1
USP48	53.521	0.416389	0.467448	0.844931	0.35799	1
LDLRAD2	0
HSPG2	0.90637	-2.35954	3.65996	0.575479	0.44809	1
CELA3B	0
CELA3A	0
LINC01635	0
LINC00339	6.53004	-0.276769	1.12815	0.0682733	0.793868	1
CDC42	190.464	-0.337322	0.353958	0.935498	0.333438	1
CDC42-AS1	2.74703	1.98347	1.81863	1.25814	0.262003	1
CDC42-IT1	1.6501	4.72739	2.87262	3.06416	0.0800365	0.71137
WNT4	0.377211	-0.91864	4.50647	0.132792	0.715554	1
AL445253.1	0
ZBTB40	11.5346	1.0594	0.876553	1.54712	0.213562	1
ZBTB40-IT1	0
EPHA8	0
C1QA	0.0750874	0.138414	4.54281	-0.186185	1	1
C1QC	0.150175	-0.361124	4.53071	-0.0284176	1	1
C1QB	0.0750874	0.138414	4.54281	-0.186185	1	1
EPHB2	0
AL512444.1	0
LACTBL1	0
TEX46	0
KDM1A	14.3856	0.709151	0.764289	0.886458	0.346439	1
AL031428.1	0.926912	1.73528	2.86978	0.441701	0.506303	1
LUZP1	14.3605	-0.212547	0.847091	0.0812277	0.77564	1
HTR1D	0
LINC01355	2.37159	4.02042	2.17177	2.86736	0.0903928	0.744019
AL109936.6	0.150175	-0.361124	4.53071	-0.0284176	1	1
HNRNPR	76.978	-0.630419	0.462585	1.93127	0.16462	0.934111
ZNF436	1.24887	0.169789	2.59207	0.000656993	0.979551	1
ZNF436-AS1	0.0750874	0.138414	4.54281	-0.186185	1	1
AL109936.2	0
TCEA3	2.25581	-3.7065	2.53515	2.15576	0.142036	0.892901
ASAP3	0
E2F2	13.8467	1.7425	0.803102	4.93715	0.0262854	0.428839
AL021154.1	0
ID3	7.63663	-4.30935	1.62874	6.544	0.0105238	0.257863
AL450043.1	0
MDS2	0
RPL11	1054.89	-1.04472	0.351099	8.38206	0.00378943	0.133125
ELOA-AS1	3.8866	-0.510433	1.47376	0.118258	0.730932	1
ELOA	20.7615	-0.352158	0.679851	0.26639	0.605764	1
PITHD1	28.1264	-0.995608	0.635948	2.52681	0.111927	0.810807
LYPLA2	36.1246	-0.432917	0.574767	0.606294	0.436186	1
GALE	8.23083	0.0346229	1.1762	0.0923126	0.761257	1
HMGCL	5.78613	-0.00320889	1.17454	0.00290568	0.957011	1
FUCA1	4.58091	2.12844	1.51555	2.09561	0.147723	0.901727
CNR2	0.104841	2.19459	4.49154	0.118169	0.731028	1
AL590609.3	0
PNRC2	60.6591	-0.0961993	0.462694	0.0433154	0.835133	1
SRSF10	101.691	-0.474954	0.374413	1.58433	0.208138	1
AL591178.1	0
MYOM3	0
AL591178.2	0
IL22RA1	0.719715	1.24991	3.45209	0.127811	0.720713	1
IFNLR1	7.00911	-0.308286	1.08235	0.0905409	0.763491	1
LINC02800	0
AL138902.1	0
GRHL3	0
STPG1	3.05409	-1.2156	1.74129	0.554613	0.456439	1
NIPAL3	18.3726	-0.616943	0.731245	0.746631	0.387545	1
RCAN3AS	3.77787	-1.75789	1.62078	0.883661	0.347201	1
RCAN3	23.8333	-0.982065	0.721077	1.6864	0.194076	0.980346
NCMAP-DT	0.222776	-0.699681	4.51566	0.0337107	0.854324	1
NCMAP	0
SRRM1	129.727	-0.811772	0.363699	4.85885	0.0275047	0.436656
AL445648.1	0
CLIC4	6.48376	-5.24417	1.96909	6.64694	0.0099326	0.249696
RUNX3	269.994	-0.31044	0.302866	1.0348	0.309034	1
AL445471.1	0.552879	-0.347832	3.496	0.0443905	0.833129	1
AL445471.2	0
LINC02793	0
AL050344.1	0
AL031432.1	0
SYF2	64.695	-0.0635433	0.464372	0.0412556	0.839045	1
AL031432.4	0.84191	0.469355	2.99266	0.00299904	0.956327	1
AL031432.5	0
RSRP1	129.879	0.314955	0.442673	0.536942	0.463703	1
AL031432.3	0.255016	0.825954	4.46583	-0.0433742	1	1
RHD	0.482052	0.287552	3.74722	-0.033219	1	1
TMEM50A	135.985	-0.564299	0.351301	2.58121	0.108139	0.796924
RHCE	0.0750874	0.138414	4.54281	-0.186185	1	1
MACO1	26.8638	-0.431969	0.613619	0.511026	0.474695	1
LDLRAP1	5.27729	1.04241	1.23411	0.736098	0.390914	1
AL606491.1	0.104841	2.19459	4.49154	0.118169	0.731028	1
MAN1C1	4.93066	3.04394	1.56582	3.96703	0.0463995	0.570252
AL031280.1	0
SELENON	1.65404	-3.25031	2.50235	1.8385	0.175126	0.94359
AL020996.1	0.225262	-0.760139	4.513	0.0631036	0.801656	1
MTFR1L	6.22631	-0.453624	1.17404	0.160821	0.688402	1
AL020996.3	0
AUNIP	0.582633	0.418462	3.41104	-0.00705886	1	1
AL033528.2	0.225262	-0.760139	4.513	0.0631036	0.801656	1
PAQR7	0
STMN1	170.833	-1.70207	0.450308	13.5864	0.000227826	0.0190709
PAFAH2	5.44413	1.31237	1.2091	1.22562	0.268261	1
EXTL1	0.302123	-0.160642	4.53514	0.0265477	0.87057	1
SLC30A2	0
AL391650.2	0
TRIM63	2.41024	-3.79735	2.5241	2.25081	0.133545	0.873158
PDIK1L	4.2748	0.690477	1.35265	0.278337	0.597793	1
FAM110D	0
C1orf232	0
AL391650.1	0
ZNF593	18.9278	-1.4612	0.832839	3.1064	0.0779853	0.708544
CNKSR1	0
CATSPER4	0
CEP85	4.83512	-0.189852	1.27142	0.0248766	0.874675	1
SH3BGRL3	1501.31	-0.529159	0.330979	2.49647	0.114102	0.815722
UBXN11	9.71875	0.950783	0.911088	1.12933	0.287917	1
CD52	1159.02	0.420015	0.403149	1.10769	0.292584	1
CRYBG2	1.00944	-1.21921	2.836	0.284481	0.593779	1
ZNF683	45.3541	-3.20085	0.786381	15.599	7.82958e-05	0.00883732
LIN28A	0
DHDDS	14.5744	0.223741	0.771571	0.108248	0.742148	1
AL513365.2	0.0750874	0.138414	4.54281	-0.186185	1	1
HMGN2	267.688	-1.26343	0.393347	9.91242	0.00164168	0.0758117
RPS6KA1	35.3648	0.811019	0.577721	2.06538	0.150677	0.907369
AL512408.1	0
ARID1A	44.3669	1.07125	0.489608	4.91182	0.0266736	0.4297
PIGV	5.70944	1.43329	1.22868	1.38479	0.239288	1
ZDHHC18	15.7405	0.147277	0.74502	0.0512102	0.820971	1
SFN	0.0750874	0.138414	4.54281	-0.186185	1	1
GPN2	10.6526	-1.21422	0.939863	1.67532	0.195547	0.983868
AL034380.1	0
GPATCH3	6.6114	0.183899	1.13422	0.0461384	0.829924	1
NUDC	56.5206	-0.982602	0.509653	3.8069	0.051042	0.593836
NR0B2	0
KDF1	0
TRNP1	0.524899	-1.60498	3.6603	0.344939	0.556992	1
TENT5B	0
SLC9A1	6.76929	-0.30843	1.14055	0.103183	0.748043	1
AL590640.1	0
WDTC1	12.187	0.863618	0.89052	1.07397	0.300051	1
TMEM222	15.6812	-0.512157	0.755018	0.459394	0.497907	1
SYTL1	38.4878	1.23083	0.528307	5.61777	0.0177792	0.34292
MAP3K6	0.5975	-1.80141	3.82613	0.373011	0.541368	1
FCN3	0
CD164L2	0
GPR3	0
WASF2	86.8774	0.129063	0.389649	0.111385	0.738573	1
FO393419.2	0.255016	0.825954	4.46583	-0.0433742	1	1
BX293535.1	0.209683	2.71939	4.47509	0.430158	0.511911	1
AHDC1	5.63876	1.53983	1.21446	1.67755	0.19525	0.982927
FGR	12.5817	2.34669	0.968035	6.33265	0.0118535	0.271791
LINC02574	0.147688	-0.160642	4.53514	-0.0797122	1	1
IFI6	221.449	-2.05678	0.405613	23.1389	1.50712e-06	0.000411986
AL445490.1	0.0750874	0.138414	4.54281	-0.186185	1	1
AL020997.5	0.0750874	0.138414	4.54281	-0.186185	1	1
FAM76A	11.0663	0.356273	0.883044	0.171731	0.678578	1
STX12	24.2575	0.177517	0.621721	0.0865252	0.768642	1
AL020997.2	0
AL020997.3	0
AL020997.4	0.0750874	0.138414	4.54281	-0.186185	1	1
PPP1R8	7.44831	0.46673	1.05675	0.227315	0.633522	1
THEMIS2	1.45678	0.48054	2.44769	0.0578034	0.810002	1
RPA2	22.5252	-0.0625992	0.659133	0.046231	0.829756	1
SMPDL3B	0
AL512288.1	0
XKR8	4.00987	0.256458	1.37099	0.0358155	0.849897	1
EYA3	17.043	-0.292703	0.743771	0.151614	0.696997	1
PTAFR	0
DNAJC8	75.6775	-0.592238	0.427408	1.96543	0.160933	0.930658
ATP5IF1	158.624	-0.914353	0.341782	6.82204	0.00900394	0.233715
AL353622.1	2.1148	3.5162	2.20102	2.79206	0.0947321	0.760247
AL353622.2	0.0750874	0.138414	4.54281	-0.186185	1	1
SESN2	15.4348	-1.07655	0.801197	1.80807	0.17874	0.952826
MED18	4.79544	0.369704	1.30476	0.0928994	0.760523	1
PHACTR4	27.9901	1.30545	0.586302	5.116	0.0237062	0.407407
RCC1	9.5029	-1.78924	1.0362	2.85313	0.091196	0.744853
SNHG3	15.6632	0.320563	0.750572	0.193582	0.659952	1
TRNAU1AP	27.1375	-0.254037	0.592062	0.184357	0.667655	1
SNHG12	47.1089	-1.34386	0.506845	6.90106	0.00861447	0.228406
TAF12	19.7741	-0.702908	0.80285	0.878376	0.348647	1
RAB42	0
LINC01715	0.222776	-0.699681	4.51566	0.0337107	0.854324	1
AL360012.1	0.150175	-0.361124	4.53071	-0.0284176	1	1
GMEB1	11.6376	-0.0311591	0.85138	0.00133392	0.970865	1
YTHDF2	36.7773	-0.267254	0.532424	0.276005	0.599332	1
OPRD1	0
AL009181.1	0
EPB41	56.5107	1.22148	0.457068	7.33871	0.00674852	0.19845
TMEM200B	0
AL357500.1	0.179929	1.3255	4.47811	-0.021884	1	1
SRSF4	71.5219	0.218642	0.410303	0.287164	0.592043	1
MECR	6.94438	0.737973	1.17922	0.446085	0.5042	1
AL590729.1	0
PTPRU	0
LINC01756	0
AC092265.1	0
AL645944.2	0
LINC01648	0
AL137076.1	0
AL161638.2	0
AL161638.1	0
MATN1	0.0750874	0.138414	4.54281	-0.186185	1	1
MATN1-AS1	0.330104	0.426936	4.44786	-0.0383068	1	1
AL137857.1	0.524207	3.54103	4.30868	0.939792	0.332331	1
LAPTM5	315.521	-0.267099	0.355534	0.57379	0.448757	1
AL137027.1	0
LINC01778	0
AL445235.1	0
SDC3	0
PUM1	49.5965	0.992965	0.491009	4.21113	0.0401596	0.530987
NKAIN1	0.302123	-0.160642	4.53514	0.0265477	0.87057	1
SNRNP40	33.7455	0.00154838	0.542666	0.0017684	0.966457	1
ZCCHC17	35.8067	-0.191366	0.544807	0.131507	0.716875	1
AL451070.1	0.104841	2.19459	4.49154	0.118169	0.731028	1
FABP3	4.5141	-4.71533	2.05023	5.02796	0.0249413	0.418636
SERINC2	0.981458	-2.47309	3.24279	0.76493	0.38179	1
LINC01226	0
AC114488.1	0
TINAGL1	0
HCRTR1	0
PEF1	30.5845	-0.760089	0.605487	1.63084	0.201588	0.993628
AC114488.2	0.147688	-0.160642	4.53514	-0.0797122	1	1
AC114488.3	0.0750874	0.138414	4.54281	-0.186185	1	1
COL16A1	0
ADGRB2	0.104841	2.19459	4.49154	0.118169	0.731028	1
AL354919.2	0
SPOCD1	0
AL354919.1	0
AL136115.2	1.72519	3.80635	2.65548	2.31244	0.128342	0.866854
PTP4A2	162.602	0.226552	0.334305	0.467571	0.494107	1
AL136115.1	0
AL136115.3	0
KHDRBS1	98.5534	-0.405046	0.376492	1.16696	0.280027	1
AL445248.1	0.330104	0.426936	4.44786	-0.0383068	1	1
TMEM39B	7.76491	-0.734363	1.06061	0.486112	0.485667	1
KPNA6	26.787	1.21048	0.613009	4.03626	0.0445324	0.561731
AL049795.2	0
TXLNA	21.3459	0.134714	0.64791	0.047765	0.826999	1
CCDC28B	29.3985	0.035843	0.590839	0.0122752	0.91178	1
AL049795.1	0.314524	3.06619	4.46692	0.623672	0.429686	1
IQCC	0.255016	0.825954	4.46583	-0.0433742	1	1
DCDC2B	0
TMEM234	3.7977	0.0288604	1.42381	0.000609595	0.980302	1
EIF3I	62.7826	-1.15658	0.486093	5.64983	0.0174571	0.339346
FAM167B	6.54038	-5.26729	1.9862	6.53568	0.0105732	0.258454
LCK	224.681	-0.0760144	0.357139	0.0503128	0.82252	1
HDAC1	54.8291	-0.663942	0.576476	1.42373	0.23279	1
MARCKSL1	12.5728	-1.45503	1.02867	1.83098	0.176011	0.947191
AL109945.1	0
TSSK3	0
FAM229A	1.99458	1.18523	1.91114	0.409329	0.52231	1
BSDC1	15.068	0.125492	0.77793	0.0608855	0.805102	1
ZBTB8B	0
ZBTB8A	1.00498	2.944	2.92563	1.2764	0.25857	1
ZBTB8OS	35.1465	0.156801	0.536053	0.100404	0.751345	1
RBBP4	50.3334	-0.140705	0.488253	0.101024	0.750605	1
SYNC	10.9194	0.698635	0.92367	0.642586	0.422776	1
AC114489.1	0
KIAA1522	0
YARS	50.3525	-0.459878	0.47338	0.961475	0.326816	1
S100PBP	34.2859	0.423908	0.55916	0.617929	0.431818	1
FNDC5	0.104841	2.19459	4.49154	0.118169	0.731028	1
HPCA	0
TMEM54	1.6473	-3.27226	2.47253	1.90859	0.16712	0.934111
AL031602.2	1.06895	0.037703	2.76309	-0.00406955	1	1
RNF19B	15.625	-0.533184	0.79081	0.466317	0.494686	1
AL020995.1	0.449812	-1.32798	4.27678	0.206167	0.649788	1
AK2	36.5949	-1.17549	0.55945	4.34865	0.0370382	0.515836
AZIN2	3.14348	2.11832	1.96175	1.23474	0.266488	1
TRIM62	6.34873	0.828218	1.09794	0.585018	0.444352	1
AL662907.3	0
ZNF362	5.6423	-0.221588	1.186	0.0394152	0.842628	1
AL513327.3	0
A3GALT2	0
AL513327.1	0.55714	-0.177006	3.52626	0.00598532	0.938333	1
PHC2	11.9086	0.106995	0.883836	0.0481999	0.826226	1
AL513327.2	0
ZSCAN20	0
CSMD2	0
HMGB4	0
CSMD2-AS1	0
C1orf94	0
AC099565.1	0
SMIM12	36.2074	-0.510164	0.536229	0.896852	0.343627	1
GJB5	0
GJB4	0
AL121988.1	0
GJB3	0
GJA4	0
AL122010.1	0
DLGAP3	0.150175	-0.361124	4.53071	-0.0284176	1	1
TMEM35B	36.9389	0.0104658	0.542395	0.007691	0.930116	1
ZMYM6	12.4527	0.104593	0.835125	0.0266712	0.870272	1
ZMYM1	5.65381	1.4145	1.19005	1.47614	0.224379	1
AL590434.1	0
SFPQ	160.092	-0.609878	0.371061	2.73091	0.0984233	0.772742
ZMYM4	20.8526	0.28842	0.677847	0.1842	0.667789	1
ZMYM4-AS1	0.28477	1.85029	4.46161	0.14115	0.70714	1
KIAA0319L	47.6989	0.156597	0.541346	0.101122	0.750488	1
NCDN	14.9916	0.0679294	0.785989	0.014816	0.90312	1
AC004865.2	9.7804	-1.12328	1.03086	1.2925	0.255587	1
TFAP2E	2.10387	1.63317	2.07077	0.718384	0.396675	1
PSMB2	92.602	-0.882929	0.424851	4.36421	0.0367014	0.513673
C1orf216	7.20838	0.175467	1.14337	0.0902999	0.763796	1
CLSPN	28.3926	-1.27833	0.630849	4.03641	0.0445286	0.561731
AL354864.1	0
AGO4	15.722	0.514015	0.799944	0.44737	0.503586	1
AGO1	8.93932	1.31767	0.982402	1.89773	0.168332	0.934111
AL139286.3	0
AL139286.2	0
AGO3	29.5668	0.530999	0.563953	0.914455	0.338935	1
AL138787.2	0.84191	0.469355	2.99266	0.00299904	0.956327	1
TEKT2	0
ADPRHL2	19.0832	-1.33578	0.75101	3.2675	0.0706654	0.680904
COL8A2	0
TRAPPC3	30.6365	-0.249676	0.587155	0.208307	0.648098	1
MAP7D1	58.5899	0.52366	0.439601	1.44635	0.229115	1
THRAP3	79.0325	-0.394746	0.411108	0.94158	0.331872	1
SH3D21	2.66488	-1.24343	1.77656	0.541707	0.461726	1
EVA1B	19.1918	-1.51813	0.761272	4.03362	0.0446022	0.561731
AL591845.1	0
STK40	28.2648	0.432837	0.610845	0.536979	0.463687	1
LSM10	30.5435	-0.830816	0.661221	1.70886	0.191133	0.976599
OSCP1	0.302123	-0.160642	4.53514	0.0265477	0.87057	1
MRPS15	41.8854	-1.33957	0.547973	6.01912	0.0141517	0.302873
CSF3R	0
AL596257.1	0
AC117945.2	0
AC117945.1	0
GRIK3	0
AL031430.1	0
AL353604.1	0
LINC01137	3.37784	-0.60266	1.5822	0.197465	0.656775	1
ZC3H12A	26.8326	-2.20142	0.707823	9.58347	0.00196337	0.0865038
MEAF6	46.2518	-1.04112	0.55538	3.57903	0.0585132	0.622682
SNIP1	18.6375	-0.268858	0.701453	0.149587	0.69893	1
DNALI1	0
GNL2	17.5029	-1.22194	0.787944	2.44596	0.117828	0.828536
AL513220.1	0
RSPO1	0
C1orf109	3.15121	-0.0411091	1.63955	0.0295885	0.863427	1
CDCA8	14.1778	-0.654625	0.805448	0.637954	0.424453	1
EPHA10	0
MANEAL	1.39302	-0.255579	2.49321	0.050709	0.821834	1
AL929472.3	0
YRDC	9.27362	-1.07309	1.07217	1.12552	0.288733	1
C1orf122	33.6171	-1.12142	0.568764	3.84926	0.049768	0.58634
MTF1	10.1402	0.370903	0.914815	0.193049	0.660391	1
AL929472.2	0.104841	2.19459	4.49154	0.118169	0.731028	1
INPP5B	5.99136	0.789127	1.12851	0.502588	0.478365	1
SF3A3	26.9064	-0.545047	0.61997	0.831329	0.361888	1
FHL3	0.327617	0.486424	4.30805	-0.0463493	1	1
UTP11	13.1247	-1.07639	0.862703	1.61613	0.203632	0.995187
POU3F1	4.97486	-0.297061	1.33817	0.100495	0.751237	1
MIR3659HG	0.150175	-0.361124	4.53071	-0.0284176	1	1
LINC02786	0
AL390839.1	0
AL390839.2	0
LINC01343	0
LINC01685	0
AL354702.2	0
RRAGC	13.8824	0.275742	0.807411	0.118844	0.730291	1
AL139260.1	5.05504	0.979818	1.32395	0.612943	0.433682	1
MYCBP	20.5211	-0.474517	0.712181	0.486606	0.485445	1
GJA9	0.179929	1.3255	4.47811	-0.021884	1	1
RHBDL2	0.357371	1.55122	4.4538	0.0618671	0.803569	1
AKIRIN1	48.9803	-0.690414	0.488147	1.94663	0.162951	0.934111
NDUFS5	138.868	-0.972619	0.355334	7.28863	0.00693925	0.202
MACF1	155.874	1.09573	0.341074	10.5611	0.00115494	0.0604961
AL356055.1	0
AL442071.2	0.25253	1.02643	4.47033	-0.0429221	1	1
AL442071.1	0.359858	1.35075	4.44929	0.0445922	0.832756	1
BMP8A	4.71668	-2.95071	1.57149	3.43094	0.0639858	0.65235
PABPC4	34.1053	-1.00467	0.568821	3.13316	0.0767148	0.702481
PABPC4-AS1	0.644628	1.55805	3.60063	0.195397	0.658462	1
HEYL	0
AL035404.2	0
NT5C1A	0
HPCAL4	0.179929	1.3255	4.47811	-0.021884	1	1
PPIE	20.944	0.437373	0.69126	0.489316	0.484233	1
BMP8B	0.377211	-0.91864	4.50647	0.132792	0.715554	1
OXCT2	5.00243	-4.93733	1.83876	7.47565	0.0062539	0.190282
BMP8B-AS1	0
AL033527.3	0.0750874	0.138414	4.54281	-0.186185	1	1
AL033527.4	0
LINC02811	0
TRIT1	3.43896	0.310391	1.54267	0.0429688	0.835784	1
MYCL	0
AL033527.2	0
MFSD2A	0.147688	-0.160642	4.53514	-0.0797122	1	1
CAP1	193.271	0.0911813	0.332063	0.0783418	0.779557	1
PPT1	24.8268	-0.525889	0.65987	0.717517	0.39696	1
RLF	38.0889	-0.370468	0.555301	0.43055	0.511719	1
TMCO2	0
AL050341.2	3.74774	2.17212	1.61549	1.92865	0.164906	0.934111
ZMPSTE24	19.1195	0.532207	0.678005	0.631075	0.426961	1
COL9A2	2.92319	2.61117	2.04784	1.72216	0.189416	0.974389
SMAP2	80.9627	0.25229	0.396786	0.409339	0.522305	1
AL031985.4	0.209683	2.71939	4.47509	0.430158	0.511911	1
ZFP69B	0.297863	-1.02481	4.50245	0.114593	0.734975	1
AL031985.3	0.0750874	0.138414	4.54281	-0.186185	1	1
ZFP69	1.93138	0.312054	2.01782	0.0380588	0.845325	1
AL603839.3	1.39161	1.74306	2.43245	0.609997	0.434789	1
EXO5	2.61192	-0.318859	1.78512	0.0612042	0.804603	1
AL603839.1	0
AL603839.2	0.104841	2.19459	4.49154	0.118169	0.731028	1
ZNF684	4.89672	1.95219	1.29212	2.37941	0.122944	0.849824
AL356379.2	0
RIMS3	0.0750874	0.138414	4.54281	-0.186185	1	1
AL031289.2	0
AL031289.1	0.434945	0.948107	4.22064	0.00675707	0.934487	1
NFYC-AS1	1.0622	-0.0165367	2.52394	0.00748344	0.931064	1
NFYC	25.7172	-0.690189	0.629813	1.19036	0.275257	1
KCNQ4	0
CITED4	0.595726	-1.90459	3.73828	0.436468	0.508832	1
AC119677.1	0
AL391730.2	0.104841	2.19459	4.49154	0.118169	0.731028	1
CTPS1	18.6654	-0.517444	0.790429	0.431431	0.511287	1
SLFNL1-AS1	0.751935	-2.09355	3.54504	0.520074	0.47081	1
SLFNL1	0
SCMH1	10.1556	0.329057	0.933525	0.127172	0.721382	1
AC093151.8	0
AC093151.3	0
FOXO6	0
AC093151.2	0
EDN2	0
HIVEP3	45.3783	1.50625	0.497056	9.4409	0.002122	0.0898894
AL445933.2	0
AC119676.1	0
AL158216.1	0
GUCA2B	0
GUCA2A	0
FOXJ3	33.5386	0.812703	0.567408	2.1315	0.144299	0.895776
AC096540.1	0
RIMKLA	0
ZMYND12	0.679334	-1.93887	3.64238	0.446474	0.504014	1
PPCS	22.3138	-0.354463	0.729068	0.308486	0.578611	1
CCDC30	3.32697	3.95355	1.78777	5.18051	0.0228416	0.397626
PPIH	25.5162	-0.578625	0.629742	0.843593	0.358371	1
AC098484.4	0.464699	1.69746	4.11835	0.158424	0.690612	1
AC098484.2	0.82505	3.55103	3.70917	1.34627	0.245932	1
YBX1	211.779	-0.797136	0.398584	3.94749	0.0469414	0.571706
CLDN19	0
P3H1	9.07412	0.892466	0.948439	0.933246	0.334021	1
C1orf50	16.6273	-0.416694	0.736611	0.323268	0.569651	1
AC098484.1	0
TMEM269	0
SVBP	16.8016	-0.402328	0.735361	0.291121	0.589503	1
ERMAP	1.90214	2.03124	2.03584	1.05549	0.304247	1
AL512353.1	0.482052	0.287552	3.74722	-0.033219	1	1
ZNF691	1.71357	0.534097	2.28553	0.0694164	0.792188	1
SLC2A1	22.2403	0.619864	0.63474	0.975159	0.323397	1
SLC2A1-AS1	0.179929	1.3255	4.47811	-0.021884	1	1
AC099795.1	0
FAM183A	0
EBNA1BP2	22.0926	-0.415721	0.708398	0.332878	0.563969	1
CFAP57	0
TMEM125	0
C1orf210	0
TIE1	0
MPL	0
AL139289.3	0
AL139289.2	0.377211	-0.91864	4.50647	0.132792	0.715554	1
CDC20	17.3812	-1.60337	0.880172	3.20889	0.0732391	0.693746
ELOVL1	42.1304	-0.438133	0.52888	0.703309	0.401674	1
MED8	18.588	-1.08132	0.757208	2.1531	0.142282	0.892901
AL139289.1	0
SZT2	12.6419	1.23536	0.848385	2.23382	0.13502	0.877604
SZT2-AS1	0.0750874	0.138414	4.54281	-0.186185	1	1
HYI	1.76386	-2.0981	2.38382	0.884535	0.346963	1
HYI-AS1	0
PTPRF	2.0861	-3.66112	2.29143	2.65695	0.103098	0.785385
KDM4A	15.1614	1.03806	0.766937	1.88364	0.169921	0.936182
KDM4A-AS1	0.58512	0.38877	3.75915	-0.00912837	1	1
ST3GAL3	26.5008	2.92899	0.764607	14.8107	0.000118858	0.0123043
AL451062.1	1.10982	3.18147	2.77801	1.57306	0.209763	1
ARTN	0
AL357079.1	2.27807	1.83519	2.0329	0.90059	0.342623	1
IPO13	5.53446	-1.02391	1.31323	0.661542	0.416016	1
AL357079.2	0.0750874	0.138414	4.54281	-0.186185	1	1
DPH2	3.28858	-1.31814	1.65067	0.713019	0.398443	1
ATP6V0B	100.685	-1.26543	0.388485	10.1599	0.00143526	0.0703784
B4GALT2	3.04141	-2.95957	1.92411	2.34391	0.125773	0.858555
CCDC24	0.750161	-2.17948	3.1789	0.683321	0.408445	1
SLC6A9	0
AL139220.2	0.327617	0.486424	4.30805	-0.0463493	1	1
KLF17	0
KLF18	0
DMAP1	20.634	0.117452	0.741034	0.114262	0.735343	1
ERI3	10.3655	-0.697446	0.935269	0.557678	0.455197	1
ERI3-IT1	0
RNF220	28.9261	0.248571	0.590704	0.193706	0.65985	1
TMEM53	4.05758	-0.486492	1.53146	0.119629	0.729437	1
ARMH1	0.703054	-0.769182	3.20211	0.139981	0.708299	1
KIF2C	7.10544	-1.27942	1.13788	1.22297	0.268779	1
AL592166.1	0.300349	-1.0644	4.50102	0.132568	0.715785	1
RPS8	1180.12	-1.29598	0.309023	16.327	5.32979e-05	0.0066131
BEST4	0.448038	-1.50308	4.20189	0.262067	0.608704	1
PLK3	22.7989	-1.73216	0.728865	5.05876	0.0245018	0.414204
TCTEX1D4	0
BTBD19	1.87287	2.93491	2.41832	1.61077	0.204383	0.995633
PTCH2	0.480278	-0.131908	4.08211	0.00561153	0.940286	1
EIF2B3	15.2784	0.834392	0.787309	1.17314	0.278757	1
HECTD3	9.24123	0.47065	0.970891	0.27268	0.60154	1
UROD	15.8759	-0.11182	0.76232	0.0522404	0.81921	1
ZSWIM5	0.900137	2.58252	3.31992	0.890097	0.345451	1
LINC01144	0
HPDL	0.150175	-0.361124	4.53071	-0.0284176	1	1
MUTYH	7.0601	-0.147256	1.07819	0.0387166	0.844011	1
TOE1	3.55349	-1.71633	1.62183	1.17818	0.277726	1
TESK2	1.77517	0.322837	2.19751	0.0556323	0.813537	1
CCDC163	1.12489	-2.72755	2.75306	1.19857	0.273608	1
MMACHC	2.13215	2.91612	2.18036	1.69025	0.193569	0.980346
PRDX1	175.02	-0.693695	0.335225	4.23602	0.0395749	0.526912
AKR1A1	35.9998	-0.900932	0.557717	2.60769	0.106347	0.793743
NASP	78.2779	-1.11464	0.418788	6.72703	0.00949627	0.242536
CCDC17	0.104841	2.19459	4.49154	0.118169	0.731028	1
GPBP1L1	37.1716	0.166658	0.53506	0.0999334	0.75191	1
TMEM69	4.7873	0.00510833	1.27291	0.00115034	0.972944	1
IPP	7.11573	-0.212956	1.08597	0.0428154	0.836073	1
AL604028.1	0.255016	0.825954	4.46583	-0.0433742	1	1
MAST2	12.0091	1.48002	0.967898	2.44888	0.117609	0.828326
PIK3R3	10.0701	-1.12985	0.963503	1.29267	0.255556	1
AL358075.1	0
AL358075.2	0.0750874	0.138414	4.54281	-0.186185	1	1
TSPAN1	0
P3R3URF	0
POMGNT1	6.42103	0.0735093	1.19324	0.0659212	0.797371	1
LURAP1	0
RAD54L	1.6629	-0.922452	2.14962	0.261992	0.608755	1
LRRC41	11.1222	-1.50098	0.945557	2.47592	0.115602	0.821132
UQCRH	144.799	-1.15501	0.353271	10.3718	0.00127954	0.0652642
NSUN4	8.91792	0.267702	1.00516	0.127359	0.721186	1
FAAH	1.03473	4.0947	3.04288	2.24721	0.133856	0.873158
LINC01398	0
DMBX1	0
TMEM275	0.0750874	0.138414	4.54281	-0.186185	1	1
MKNK1-AS1	0
KNCN	0
MKNK1	13.186	0.906557	0.910858	1.02324	0.311753	1
MOB3C	4.6152	0.753466	1.31517	0.337328	0.561375	1
ATPAF1	17.7115	-0.743606	0.765247	1.0295	0.310275	1
TEX38	0
EFCAB14-AS1	0
EFCAB14	30.7522	0.18186	0.592325	0.112717	0.737072	1
CYP4B1	0
CYP4A11	0
CYP4X1	0
CYP4Z1	0
CYP4A22-AS1	0
CYP4A22	0
LINC00853	0.302123	-0.160642	4.53514	0.0265477	0.87057	1
PDZK1IP1	0
TAL1	0
AL135960.1	0
STIL	8.40628	-0.0051452	1.01157	0.0169773	0.896332	1
CMPK1	50.0442	0.475971	0.460431	1.0892	0.296649	1
LINC01389	0.0750874	0.138414	4.54281	-0.186185	1	1
FOXE3	0
FOXD2-AS1	0.37295	-1.27738	4.4939	0.17736	0.673652	1
FOXD2	0.524899	-1.60498	3.6603	0.344939	0.556992	1
LINC01738	0
TRABD2B	0
AL691459.1	0
AC096541.1	0
LINC02794	0
AL356289.1	0
AL109659.1	0
SLC5A9	0
AL109659.2	0
SPATA6	0.709088	-0.544139	3.60157	0.0530154	0.817897	1
AGBL4	0.209683	2.71939	4.47509	0.430158	0.511911	1
AL391844.1	0
BEND5	0
AL645507.1	0
AC099788.1	0
AL590432.1	0
AGBL4-IT1	0
ELAVL4	0
AL592182.2	0
AL592182.1	0
LINC02808	0
AL592182.3	0
DMRTA2	0
AL049637.2	0
FAF1	79.2484	0.561	0.428452	1.78328	0.181747	0.960043
AL049637.1	0.104841	2.19459	4.49154	0.118169	0.731028	1
CDKN2C	4.67771	-0.207866	1.37758	0.0833059	0.772866	1
C1orf185	0
LINC01562	0.452298	-1.37925	4.22285	0.221091	0.63821	1
RNF11	20.1906	0.205395	0.670324	0.0998979	0.751952	1
AL162430.2	0
TTC39A	0.150175	-0.361124	4.53071	-0.0284176	1	1
TTC39A-AS1	0
EPS15	79.8405	0.67992	0.420868	2.6818	0.101501	0.782616
AC104170.2	0.104841	2.19459	4.49154	0.118169	0.731028	1
AC104170.1	4.17186	-0.206563	1.49972	0.0428228	0.836059	1
OSBPL9	21.1481	0.630623	0.652815	0.959971	0.327194	1
NRDC	72.425	-0.0637948	0.413897	0.024137	0.876537	1
AL050343.2	0.209683	2.71939	4.47509	0.430158	0.511911	1
AL050343.3	0
RAB3B	0
TXNDC12	25.4575	-0.675736	0.66559	1.12332	0.289205	1
KTI12	1.32148	0.0831877	2.36415	0.00145684	0.969553	1
AL445685.1	0.225262	-0.760139	4.513	0.0631036	0.801656	1
TXNDC12-AS1	0.104841	2.19459	4.49154	0.118169	0.731028	1
BTF3L4	17.9489	-0.397061	0.777086	0.280306	0.596501	1
ZFYVE9	0
CC2D1B	19.2426	1.59722	0.734813	4.90805	0.0267317	0.429845
AL513218.1	0
AL513218.2	0.104841	2.19459	4.49154	0.118169	0.731028	1
ORC1	3.27015	-2.4902	1.768	2.04495	0.152712	0.910909
PRPF38A	28.5077	-0.366521	0.613854	0.418291	0.517791	1
TUT4	54.7273	0.452216	0.484582	0.937945	0.332807	1
AL591167.1	0
GPX7	5.39877	-0.873221	1.34009	0.493109	0.482544	1
SHISAL2A	8.07428	0.424849	1.00913	0.181313	0.670247	1
COA7	2.76408	-0.474084	1.80057	0.0963479	0.756257	1
ZYG11B	3.53437	1.7128	1.47776	1.4024	0.236323	1
ZYG11A	0.104841	2.19459	4.49154	0.118169	0.731028	1
AC099677.4	0.104841	2.19459	4.49154	0.118169	0.731028	1
ECHDC2	9.87019	-0.0748198	0.953819	0.0310825	0.860056	1
SCP2	46.0334	-0.148572	0.478939	0.0981196	0.754098	1
PODN	0.104841	2.19459	4.49154	0.118169	0.731028	1
AL445183.1	0
SLC1A7	0
AL445183.2	0
CPT2	6.45038	0.0820649	1.15525	0.0312455	0.859694	1
AL606760.2	0
CZIB	23.8449	-0.846107	0.67628	1.64121	0.20016	0.990328
AL606760.3	0.225262	-0.760139	4.513	0.0631036	0.801656	1
MAGOH	54.0997	-1.17829	0.489049	5.7849	0.0161644	0.325054
AL606760.1	0
LRP8	18.2232	1.87745	0.841835	5.14142	0.0233615	0.402669
AL355483.3	0
AL355483.1	1.6501	4.72739	2.87262	3.06416	0.0800365	0.71137
AL355483.2	0
LINC01771	0.255016	0.825954	4.46583	-0.0433742	1	1
AC119428.2	0
AC119428.1	0
LINC02812	0
DMRTB1	0
GLIS1	0
NDC1	5.53946	-0.372702	1.27181	0.147168	0.701256	1
YIPF1	12.1169	0.203158	0.877542	0.0757915	0.783084	1
DIO1	0
HSPB11	51.6064	-1.29654	0.589369	4.95655	0.025992	0.427377
LRRC42	3.82659	-0.874783	1.57229	0.390806	0.531876	1
LDLRAD1	0
TMEM59	120.375	-0.603726	0.408242	2.21358	0.136801	0.883799
TCEANC2	5.47449	0.9596	1.21687	0.660178	0.416497	1
CDCP2	0
AL357673.2	0
CYB5RL	1.30533	1.35944	2.65758	0.304556	0.58104	1
MRPL37	25.8391	-0.640648	0.617181	1.08283	0.298065	1
SSBP3	49.3266	1.70393	0.469272	13.6453	0.000220796	0.018661
SSBP3-AS1	0
AL161644.1	0
AL035415.1	0.82505	3.55103	3.70917	1.34627	0.245932	1
AC099796.2	0
LINC02784	0
ACOT11	0.150175	-0.361124	4.53071	-0.0284176	1	1
FAM151A	0
AL590093.1	0
MROH7	0
TTC4	10.4507	0.655035	0.907795	0.535912	0.464132	1
PARS2	0.25253	1.02643	4.47033	-0.0429221	1	1
TTC22	4.70549	3.4931	1.45001	6.22628	0.0125868	0.281954
AC096536.1	0
LEXM	2.51263	2.58516	1.92706	2.023	0.154933	0.9148
DHCR24	10.8593	0.189829	0.905427	0.0497636	0.823475	1
AC096536.3	0.569541	1.96322	3.79701	0.298169	0.585032	1
AC096536.2	0.0750874	0.138414	4.54281	-0.186185	1	1
DHCR24-DT	0
AL590440.2	0
TMEM61	0
AL590440.1	0
BSND	0
PCSK9	0
USP24	42.2299	1.31859	0.50851	6.92029	0.00852234	0.227284
MIR4422HG	0.147688	-0.160642	4.53514	-0.0797122	1	1
AL603840.1	0.104841	2.19459	4.49154	0.118169	0.731028	1
LINC01755	0
LINC01753	0
AL353681.1	0
AC119674.1	0.104841	2.19459	4.49154	0.118169	0.731028	1
LINC01767	0
PLPP3	0.604247	-1.76418	4.23237	0.299888	0.583952	1
PRKAA2	0
FYB2	0
AL360295.1	0
C8A	0
C8B	0
AL161740.1	0
DAB1	2.03494	0.759397	1.91867	0.186021	0.666249	1
AL390243.1	0
DAB1-AS1	0
AL445193.2	0.104841	2.19459	4.49154	0.118169	0.731028	1
OMA1	5.22241	-0.264432	1.34581	0.0809801	0.775974	1
AL035411.3	0.0750874	0.138414	4.54281	-0.186185	1	1
TACSTD2	0
MYSM1	19.026	0.536961	0.676231	0.644345	0.422142	1
AL136985.3	0.150175	-0.361124	4.53071	-0.0284176	1	1
JUN	409.898	-1.20158	0.366565	10.062	0.00151357	0.0731319
LINC01135	2.91989	-1.08488	1.70817	0.450492	0.502101	1
AL136985.2	0
AL136985.1	0
LINC02777	0.377211	-0.91864	4.50647	0.132792	0.715554	1
LINC01358	2.94767	0.437988	1.58751	0.0779311	0.780121	1
AL592431.2	0
AL592431.1	0
AC093425.1	0.225262	-0.760139	4.513	0.0631036	0.801656	1
AC093424.1	0
FGGY	45.1181	2.62043	0.752134	12.0262	0.000524593	0.0347642
AL035416.1	0
HOOK1	0
CYP2J2	0.717229	1.31628	3.15355	0.176691	0.674232	1
C1orf87	0
LINC02778	0
LINC01748	0
AC099792.1	0
NFIA	0.179929	1.3255	4.47811	-0.021884	1	1
NFIA-AS2	0
NFIA-AS1	0
AC099791.3	0
AC099791.4	0
TM2D1	21.1641	0.0609815	0.659318	0.0172763	0.895428	1
AC099791.2	0
PATJ	3.896	1.80707	1.4455	1.59737	0.206276	1
L1TD1	0.104841	2.19459	4.49154	0.118169	0.731028	1
KANK4	0
USP1	48.1478	-0.209554	0.475731	0.192352	0.660966	1
DOCK7	2.10863	-0.670245	2.41479	0.04976	0.823481	1
ANGPTL3	0
AC103923.1	0
ATG4C	6.87145	1.93663	1.11199	3.1562	0.0756389	0.698297
AC099794.1	0
LINC01739	0
AL162400.3	0
AL162400.1	0
AL162400.2	0
AC096543.1	0
LINC00466	0
AC096543.2	0
FOXD3-AS1	0
FOXD3	0.147688	-0.160642	4.53514	-0.0797122	1	1
ALG6	8.16343	0.374302	1.0671	0.133507	0.714823	1
ITGB3BP	13.2719	0.661613	0.787348	0.723636	0.394954	1
BX004807.1	0
EFCAB7	1.73658	0.81383	2.06385	0.198141	0.656225	1
DLEU2L	0.406965	1.02721	4.42133	-0.0762033	1	1
PGM1	21.2285	-1.2765	0.709376	3.22577	0.0724878	0.68885
ROR1	0
ROR1-AS1	0
AL445205.1	0
UBE2U	0
CACHD1	0
RAVER2	0.179929	1.3255	4.47811	-0.021884	1	1
JAK1	167.76	0.194027	0.329552	0.351194	0.553438	1
LINC01359	0.104841	2.19459	4.49154	0.118169	0.731028	1
AL357078.2	0
AK4	3.21953	-1.22177	1.66144	0.579892	0.446355	1
DNAJC6	2.8703	-0.800767	1.71124	0.26608	0.605973	1
AL139294.1	0.222776	-0.699681	4.51566	0.0337107	0.854324	1
LEPROT	15.4251	-0.125098	0.770462	0.0506515	0.821933	1
LEPR	3.84939	2.62802	1.66278	2.51612	0.112687	0.81331
AC119800.1	0.147688	-0.160642	4.53514	-0.0797122	1	1
AL513493.1	0
PDE4B	162.241	0.488336	0.491629	1.00829	0.315312	1
AL590783.1	0.0750874	0.138414	4.54281	-0.186185	1	1
SGIP1	0
AL139147.1	0
TCTEX1D1	0
INSL5	0
WDR78	1.81465	1.1827	2.00743	0.382648	0.536189	1
AL592161.1	0
MIER1	86.3152	-0.409949	0.419114	0.991014	0.319495	1
SLC35D1	14.7401	0.601677	0.823335	0.642879	0.42267	1
C1orf141	0
AL133320.2	0
IL23R	0
IL12RB2	39.5664	-0.884084	0.651009	1.65005	0.198952	0.989699
SERBP1	156.887	-0.913654	0.396185	5.279	0.0215842	0.382589
LINC01702	0
GADD45A	15.7065	0.0243603	0.7534	0.0019784	0.964522	1
GNG12	3.8305	-4.4813	2.05129	4.6405	0.0312259	0.465824
GNG12-AS1	0.899623	-2.37468	3.30397	0.701847	0.402164	1
DIRAS3	0
WLS	0.302123	-0.160642	4.53514	0.0265477	0.87057	1
RPE65	0
DEPDC1	2.79206	-0.29257	1.79402	0.0633578	0.801265	1
AL138789.1	0
DEPDC1-AS1	0
AL035412.1	0
AL033530.1	0
AL691520.1	0
LINC01707	0
LINC02791	0
LINC01758	0
AL359894.1	0
LRRC7	0.0750874	0.138414	4.54281	-0.186185	1	1
AL117353.1	0
AL158840.1	0
LRRC40	9.57692	0.181547	0.933572	0.0438832	0.834071	1
SRSF11	127.364	-0.236315	0.372686	0.393947	0.530232	1
AL353771.1	0
ANKRD13C	29.4155	0.237439	0.583526	0.196839	0.657285	1
HHLA3	1.60745	0.618536	2.31422	0.122413	0.726432	1
AL158839.1	0
CTH	3.55352	-3.24942	1.753	3.40481	0.0650068	0.656636
AL354872.2	0
LINC01788	0
AL513285.1	0
PTGER3	0.255016	0.825954	4.46583	-0.0433742	1	1
AL031429.1	0
AL031429.2	0
ZRANB2-AS1	0.0750874	0.138414	4.54281	-0.186185	1	1
ZRANB2	47.3154	-0.083305	0.487566	0.0533732	0.817294	1
ZRANB2-AS2	1.40648	1.09832	2.3155	0.25907	0.61076	1
NEGR1	0
AL354949.1	0
NEGR1-IT1	0
AL513166.1	0
AL583808.1	0.147688	-0.160642	4.53514	-0.0797122	1	1
LINC02796	0
LINC02797	0
LINC01360	0
LINC02238	0
AL591463.1	0
LRRIQ3	0.62548	-0.54194	3.31783	0.0795064	0.777967	1
FPGT	2.30255	-0.160537	1.85914	0.0465231	0.829228	1
TNNI3K	0.104841	2.19459	4.49154	0.118169	0.731028	1
AC093158.1	0
AC105271.1	0
LRRC53	0
ERICH3	1.25948	-0.845002	2.39367	0.18431	0.667695	1
ERICH3-AS1	0
AC135803.1	0
CRYZ	8.54788	-0.792187	1.10291	0.570113	0.450214	1
TYW3	21.4396	-1.01604	0.726505	2.08876	0.148387	0.902651
AC133865.1	0
AC099786.3	0
AC099786.1	0
LHX8	0
AC099786.2	0
SLC44A5	0.150175	-0.361124	4.53071	-0.0284176	1	1
ACADM	24.6836	-0.214693	0.62521	0.116228	0.733162	1
RABGGTB	18.361	-0.286163	0.717152	0.163927	0.685567	1
MSH4	0.150175	-0.361124	4.53071	-0.0284176	1	1
ASB17	0
AC092813.1	0.104841	2.19459	4.49154	0.118169	0.731028	1
AC092813.2	0
ST6GALNAC3	0.552879	-0.347832	3.496	0.0443905	0.833129	1
AC104458.1	0
LINC02567	0
ST6GALNAC5	0.104841	2.19459	4.49154	0.118169	0.731028	1
AL035409.1	0
PIGK	11.9151	0.447144	0.860157	0.286669	0.592363	1
AC093433.2	0
AK5	0.104841	2.19459	4.49154	0.118169	0.731028	1
AC095030.1	0
AC093575.1	0
AC118549.1	16.9107	0.00129421	0.765563	0.016812	0.896834	1
USP33	32.7829	0.353731	0.548514	0.422074	0.515904	1
MIGA1	14.4228	0.892207	0.776749	1.35527	0.24436	1
NEXN-AS1	0.104841	2.19459	4.49154	0.118169	0.731028	1
NEXN	0.327617	0.486424	4.30805	-0.0463493	1	1
FUBP1	45.3522	-0.00188457	0.482852	0.000825384	0.97708	1
DNAJB4	5.32284	-1.11679	1.29455	0.70399	0.401446	1
GIPC2	0.150175	-0.361124	4.53071	-0.0284176	1	1
AC103591.3	3.60022	1.56971	1.57685	1.02933	0.310317	1
AC103591.4	0
AC096531.2	0
PTGFR	0
IFI44L	47.3964	-2.09057	0.710057	8.42701	0.00369687	0.130397
IFI44	34.0365	-1.12973	0.593728	3.39928	0.065225	0.658081
ADGRL4	0
AL353651.2	0
AL353651.1	0
LINC02792	0
AC099671.1	0
AC098657.2	0
AL606519.1	0
AL136234.1	0
LINC01781	0
AC093154.1	0
ADGRL2	0
AL138799.2	0
AL138799.4	0
AC117944.1	0
AL157944.1	0
LINC01362	0
LINC01361	0
AC116099.1	0
LINC01712	0
LINC01725	0
AL035706.1	0
TTLL7	0.405191	0.120377	4.36396	-0.0208073	1	1
TTLL7-IT1	0
AC104454.2	0
AL359504.2	1.24442	4.42689	2.80006	2.93443	0.0867092	0.734356
PRKACB	27.0513	1.51721	0.581166	7.03764	0.00798143	0.218521
SAMD13	0
DNASE2B	0
AL844170.1	0
RPF1	17.6078	0.959424	0.718255	1.86428	0.172131	0.938416
GNG5	177.276	-1.0334	0.385267	7.00519	0.00812736	0.221133
SPATA1	2.18511	0.480537	1.84162	0.0905596	0.763467	1
CTBS	14.5972	-1.18432	0.824685	2.02686	0.15454	0.913403
AL359762.1	0.150175	-0.361124	4.53071	-0.0284176	1	1
AL359762.2	0
LINC01555	0
SSX2IP	3.69149	0.320556	1.45417	0.049979	0.8231	1
AC104169.1	0
LPAR3	0.0750874	0.138414	4.54281	-0.186185	1	1
MCOLN2	41.0481	-0.396456	0.51356	0.590556	0.442204	1
WDR63	1.04802	-2.68626	2.81209	1.14412	0.284782	1
MCOLN3	0
SYDE2	0.104841	2.19459	4.49154	0.118169	0.731028	1
C1orf52	20.2999	-1.16408	0.711045	2.72707	0.0986604	0.77298
BCL10	14.8592	0.220964	0.761448	0.0888288	0.765671	1
AL078459.1	0.746983	1.88531	3.13616	0.420243	0.516816	1
DDAH1	0.302123	-0.160642	4.53514	0.0265477	0.87057	1
AL360219.1	0
AC092807.3	0
AC092807.2	0
CCN1	3.53513	-4.35719	2.09833	4.19272	0.040598	0.534096
AC092807.1	0
ZNHIT6	13.6666	0.652091	0.785079	0.714031	0.398109	1
COL24A1	0.104841	2.19459	4.49154	0.118169	0.731028	1
LINC02795	0.104841	2.19459	4.49154	0.118169	0.731028	1
ODF2L	44.0353	0.311327	0.511432	0.416353	0.518762	1
CLCA2	0
CLCA1	0
CLCA4	0
CLCA4-AS1	0.104841	2.19459	4.49154	0.118169	0.731028	1
AL049597.2	0.920856	-1.17659	2.8874	0.280643	0.59628	1
SH3GLB1	67.8978	-0.0262153	0.439742	0.00565947	0.940032	1
AL355981.1	0
SELENOF	69.5202	-0.756998	0.437726	2.98867	0.0838492	0.725132
HS2ST1	18.7782	1.4663	0.774456	3.73718	0.0532143	0.600635
AL121989.1	0
LINC01140	0
LINC02801	0
LMO4	36.3147	0.182969	0.592552	0.0956591	0.757102	1
LINC01364	0
PKN2-AS1	0.674382	2.18131	3.55384	0.453581	0.500639	1
AL445438.1	0
PKN2	38.8764	0.00236398	0.509131	0.0012032	0.972329	1
GTF2B	42.4604	-1.08331	0.534575	4.1691	0.0411678	0.537887
KYAT3	11.4152	0.630417	0.848435	0.569992	0.450262	1
RBMXL1	5.16702	0.440221	1.24536	0.144519	0.703829	1
GBP3	15.2366	0.543716	0.798198	0.529059	0.467003	1
GBP1	17.9454	-0.305354	0.748798	0.185611	0.666595	1
GBP2	52.3365	0.0885797	0.455618	0.0386472	0.844149	1
AC104459.1	0
GBP7	0.104841	2.19459	4.49154	0.118169	0.731028	1
GBP4	26.0918	0.366051	0.614594	0.386944	0.53391	1
AC099063.4	2.98823	-1.15193	1.70226	0.519911	0.47088	1
GBP5	66.912	0.768555	0.43571	3.1976	0.0737462	0.695506
AC099063.1	0.389612	2.1975	4.41716	0.274884	0.600074	1
GBP6	0
AL596214.1	0.150175	-0.361124	4.53071	-0.0284176	1	1
LRRC8B	5.36679	0.239098	1.23395	0.0491513	0.824547	1
LRRC8C-DT	1.3558	-0.595905	2.45807	0.115287	0.734204	1
AC093423.2	2.04734	1.7395	1.96949	0.812246	0.367457	1
LRRC8C	36.754	0.861758	0.546176	2.5613	0.109509	0.80252
AC099568.1	0
AC099568.2	0
LRRC8D	12.0215	0.9711	0.847323	1.37219	0.241436	1
AL391497.1	0
ZNF326	19.6511	-0.719698	0.706127	1.10533	0.293098	1
AL161797.1	0
AC098656.1	0
AL627316.1	0
LINC02787	0
BARHL2	0
AC092805.1	0
LINC02609	0.5975	-1.80141	3.82613	0.373011	0.541368	1
LINC02788	0
LINC01763	0
AC091614.1	0
ZNF644	74.4817	-0.417852	0.43546	0.893217	0.344607	1
HFM1	0.389612	2.1975	4.41716	0.274884	0.600074	1
CDC7	9.83677	1.26433	1.03065	1.53508	0.215352	1
TGFBR3	87.0165	1.40715	0.393658	13.2467	0.000273053	0.0218131
BRDT	0
EPHX4	0
SETSIP	0
BTBD8	0.104841	2.19459	4.49154	0.118169	0.731028	1
AC104836.1	0
C1orf146	0
GLMN	16.982	-0.224218	0.783195	0.143669	0.70466	1
RPAP2	26.6722	0.306824	0.598803	0.281297	0.595852	1
GFI1	22.8673	0.919044	0.624032	2.24101	0.134393	0.874707
EVI5	5.27634	2.21615	1.56694	2.10743	0.146586	0.89845
RPL5	383.685	-0.662744	0.333724	3.88038	0.0488535	0.582215
DIPK1A	20.394	0.508992	0.690564	0.583871	0.444799	1
AC093577.1	0.255016	0.825954	4.46583	-0.0433742	1	1
MTF2	24.8765	0.196114	0.612004	0.113248	0.736477	1
TMED5	40.9797	-0.153046	0.545337	0.113189	0.736542	1
CCDC18	25.271	0.471883	0.648055	0.596998	0.439726	1
CCDC18-AS1	38.5298	0.693095	0.524748	1.80634	0.178948	0.952826
DR1	47.6887	-0.647341	0.528706	1.59237	0.206987	1
FNBP1L	0.302123	-0.160642	4.53514	0.0265477	0.87057	1
BCAR3	8.38152	-3.08882	3.05627	0.684802	0.407938	1
AL109613.1	0
AL049796.1	0
DNTTIP2	45.3227	-0.678698	0.492978	1.9056	0.167452	0.934111
GCLM	31.733	0.593344	0.570423	1.13138	0.287482	1
ABCA4	0
AC093579.1	0
ARHGAP29	0
ARHGAP29-AS1	0
AC097059.1	0
AC118469.2	0.0750874	0.138414	4.54281	-0.186185	1	1
ABCD3	7.23586	0.331539	1.11934	0.0943413	0.758729	1
F3	0
AC093117.1	0
SLC44A3	0.147688	-0.160642	4.53514	-0.0797122	1	1
CNN3	0.449812	-1.32798	4.27678	0.206167	0.649788	1
AC105942.1	0.104841	2.19459	4.49154	0.118169	0.731028	1
ALG14	3.08673	-0.404365	1.63232	0.0927332	0.760731	1
AC095033.1	0
TLCD4	0.104841	2.19459	4.49154	0.118169	0.731028	1
AC092802.3	0
AC092802.1	0.104841	2.19459	4.49154	0.118169	0.731028	1
RWDD3	14.1189	0.777565	0.77934	1.02203	0.312038	1
AC092802.2	0.147688	-0.160642	4.53514	-0.0797122	1	1
AC092802.4	0
LINC01760	0
LINC01650	0
AL445218.1	0
LINC01761	0
LINC02607	0
AL683887.1	0
LINC02790	0
LINC01787	0
PTBP2	18.6464	0.890733	0.731089	1.56281	0.211255	1
DPYD	83.7788	2.57549	0.542993	22.4255	2.18453e-06	0.000534529
DPYD-AS1	3.65708	3.00397	1.62318	3.65502	0.0559006	0.612443
DPYD-IT1	0
DPYD-AS2	0
MIR137HG	0
BX005019.1	0
AC104453.1	0
LINC01776	0
SNX7	1.05406	-2.58188	3.17772	0.841774	0.35889	1
PLPPR5	0
AL445433.2	0
PLPPR4	0
LINC01708	0
PALMD	0
FRRS1	0.875523	-0.313905	2.97208	0.0395305	0.842401	1
AGL	11.7989	0.261557	0.858606	0.113428	0.736274	1
AC118553.1	0.0750874	0.138414	4.54281	-0.186185	1	1
SLC35A3	13.2481	0.280067	0.812436	0.125559	0.723082	1
MFSD14A	37.6519	-0.107366	0.530738	0.049528	0.823887	1
AC093019.2	2.37744	1.36705	1.81791	0.59087	0.442083	1
SASS6	7.69611	-1.04264	1.15394	0.892734	0.344737	1
TRMT13	11.8691	0.357731	0.869628	0.238819	0.62506	1
LRRC39	0.406965	1.02721	4.42133	-0.0762033	1	1
DBT	6.53023	1.61859	1.12324	2.12949	0.144489	0.895776
AL445928.2	0.0750874	0.138414	4.54281	-0.186185	1	1
RTCA-AS1	0.957358	-0.402795	2.62807	0.0563206	0.812409	1
RTCA	30.3046	-0.0372104	0.57036	0.0135458	0.907346	1
AC104457.2	0
CDC14A	85.2085	2.02686	0.497139	16.9208	3.89731e-05	0.00516542
AL589990.1	0.389612	2.1975	4.41716	0.274884	0.600074	1
GPR88	0
LINC01349	0
AC099670.3	0
VCAM1	44.4514	-3.14305	0.645849	22.7785	1.81789e-06	0.000462711
EXTL2	6.2744	-1.37	1.32276	1.10484	0.293206	1
AC104506.1	0.300349	-1.0644	4.50102	0.132568	0.715785	1
SLC30A7	20.0093	0.605877	0.70832	0.755232	0.384825	1
DPH5	4.57396	-0.715345	1.40214	0.307163	0.579426	1
AC093157.2	0
AC093157.1	4.64667	2.03502	1.33482	2.43997	0.118278	0.831035
AL109741.1	0.749469	1.77455	3.39407	0.317714	0.572985	1
S1PR1	18.0633	2.33124	0.754209	10.1543	0.00143966	0.0703784
LINC01307	0.104841	2.19459	4.49154	0.118169	0.731028	1
LINC01709	0
OLFM3	0
AC114485.1	0
AC099567.1	0.0750874	0.138414	4.54281	-0.186185	1	1
COL11A1	0
AC095032.2	0
AC095032.1	0.0750874	0.138414	4.54281	-0.186185	1	1
RNPC3	15.1332	0.660621	0.851754	0.693239	0.405065	1
AMY2B	1.85978	4.90514	2.47307	4.31402	0.0377996	0.517048
AMY2A	0
AMY1A	0
AMY1B	0
AMY1C	0
AL591888.1	0
LINC01676	0
LINC01677	0.147688	-0.160642	4.53514	-0.0797122	1	1
AL355306.2	0
LINC01661	0
PRMT6	2.88945	-0.0852954	1.66551	0.0392381	0.842978	1
NTNG1	0
VAV3	5.6573	0.914491	1.41021	0.536269	0.463983	1
VAV3-AS1	0
LINC02785	0
SLC25A24	41.9423	0.533596	0.536484	1.06619	0.301808	1
AL359258.2	0.896075	-2.50617	3.21838	0.82242	0.364474	1
NBPF4	0
AL359258.1	0
AL390038.1	0
NBPF6	0
FAM102B	63.9183	-0.241609	0.438579	0.325799	0.568143	1
HENMT1	13.4705	-0.418634	0.846381	0.287961	0.59153	1
AL160171.1	0.480278	-0.131908	4.08211	0.00561153	0.940286	1
PRPF38B	80.4625	-0.416604	0.417152	1.03063	0.310012	1
FNDC7	0.150175	-0.361124	4.53071	-0.0284176	1	1
AL591719.2	0
STXBP3	28.61	0.430053	0.585086	0.561135	0.453803	1
AKNAD1	2.74385	4.00426	1.95921	4.50888	0.0337193	0.487537
SPATA42	0
GPSM2	10.068	0.803113	0.901929	0.834191	0.361063	1
CLCC1	5.57574	-0.142846	1.21656	0.0138833	0.906204	1
WDR47	14.433	-0.931845	0.81131	1.31635	0.251248	1
TAF13	9.56085	0.283159	0.932662	0.100214	0.751573	1
AL356488.3	0.179929	1.3255	4.47811	-0.021884	1	1
TMEM167B	14.612	-0.399194	0.778482	0.259129	0.610719	1
AL356488.2	0.225262	-0.760139	4.513	0.0631036	0.801656	1
C1orf194	0
KIAA1324	0.864917	0.869794	2.92178	0.0811084	0.775801	1
SARS	36.6094	0.0656203	0.525265	0.0178386	0.893749	1
CELSR2	0.147688	-0.160642	4.53514	-0.0797122	1	1
PSRC1	4.26527	-0.134927	1.42744	0.0190373	0.89026	1
MYBPHL	0
SORT1	4.7473	-1.25801	1.5764	0.581421	0.445756	1
PSMA5	88.0139	-1.30392	0.466579	7.74544	0.00538484	0.171599
SYPL2	0
ATXN7L2	2.07235	-0.875451	2.01502	0.242828	0.622171	1
CYB561D1	5.62724	0.715596	1.17177	0.38304	0.535981	1
AMIGO1	0
GPR61	0
AL355310.3	0
GNAI3	54.1809	-0.113846	0.45652	0.0619282	0.803474	1
AL355310.1	0
GNAT2	0
AMPD2	5.69598	0.95534	1.16326	0.695244	0.404386	1
AL355310.2	0
GSTM4	3.61144	-2.22707	1.89124	0.823754	0.364085	1
GSTM2	1.35618	-2.94919	2.95331	1.15699	0.282091	1
GSTM1	0
AC000032.1	0
GSTM5	0
AL158847.1	0
GSTM3	1.35441	-2.97951	2.63503	1.47061	0.22525	1
EPS8L3	0
LINC01768	1.08007	2.39475	2.85375	0.85662	0.354686	1
AL450468.1	0
AL450468.2	0.0750874	0.138414	4.54281	-0.186185	1	1
CSF1	114.212	-0.564909	0.542	1.02149	0.312166	1
AHCYL1	20.6418	-0.306544	0.67306	0.22317	0.636635	1
STRIP1	11.2602	0.33159	0.861963	0.166403	0.683328	1
AL160006.1	1.00498	2.944	2.92563	1.2764	0.25857	1
ALX3	0
LINC01397	0
UBL4B	0
SLC6A17	1.80599	-3.37602	2.69611	1.66632	0.196752	0.986016
AL355990.1	0
AL355990.2	0
LINC02586	0
KCNC4	0.402704	0.152433	3.95342	-0.0265518	1	1
RBM15-AS1	1.07352	-1.44863	2.72149	0.426863	0.513532	1
RBM15	18.7618	-0.422736	0.722036	0.335442	0.562472	1
LAMTOR5-AS1	6.60744	0.880661	1.12025	0.645572	0.4217	1
SLC16A4	1.57649	0.0716692	2.19373	0.00955098	0.922147	1
AL355488.1	0.255016	0.825954	4.46583	-0.0433742	1	1
LAMTOR5	75.7341	-1.00142	0.453499	4.87653	0.0272243	0.433889
PROK1	0
AL358215.1	0
AL358215.2	0
CYMP-AS1	0
KCNA10	0
KCNA2	1.95045	2.50492	2.51237	1.08029	0.298634	1
AL365361.1	6.08709	2.46459	1.26239	4.00934	0.0452489	0.565059
KCNA3	14.9866	-0.0858196	0.904144	0.0859615	0.769375	1
CD53	187.408	-0.290063	0.331255	0.7716	0.379723	1
AL360270.2	0.179929	1.3255	4.47811	-0.021884	1	1
AL360270.1	1.93487	3.98635	2.31213	3.28991	0.069707	0.678267
LRIF1	18.9523	0.203093	0.726433	0.115418	0.734058	1
AL360270.3	0.0750874	0.138414	4.54281	-0.186185	1	1
DRAM2	9.52323	0.058908	0.942518	0.0114736	0.914698	1
CEPT1	8.93706	1.13002	0.969864	1.40676	0.235594	1
AL355816.1	0
AL355816.2	0.314524	3.06619	4.46692	0.623672	0.429686	1
DENND2D	23.0805	0.495431	0.657195	0.589887	0.442463	1
CHI3L2	0.104841	2.19459	4.49154	0.118169	0.731028	1
CHIA	0
AL356387.1	0
PIFO	0
OVGP1	0
AL390195.2	0
AL390195.1	0
WDR77	8.61246	-0.923847	1.15669	0.685892	0.407565	1
ATP5PB	87.0061	-0.666181	0.448274	2.27948	0.131096	0.871188
C1orf162	0.179929	1.3255	4.47811	-0.021884	1	1
TMIGD3	0.0750874	0.138414	4.54281	-0.186185	1	1
ADORA3	0
RAP1A	142.002	0.233248	0.366932	0.407379	0.523303	1
LINC01160	0.150175	-0.361124	4.53071	-0.0284176	1	1
INKA2	7.30523	1.36088	1.09974	1.58887	0.207488	1
INKA2-AS1	0
AL049557.1	0.0750874	0.138414	4.54281	-0.186185	1	1
DDX20	4.64447	-0.41052	1.46363	0.0957297	0.757016	1
KCND3	0.449812	-1.32798	4.27678	0.206167	0.649788	1
KCND3-IT1	0
KCND3-AS1	0
LINC01750	0
AL445426.1	0
CTTNBP2NL	2.77201	0.442167	1.63295	0.0861951	0.769071	1
WNT2B	0.449812	-1.32798	4.27678	0.206167	0.649788	1
AL354760.1	0
ST7L	11.6259	0.664781	0.896423	0.591901	0.441685	1
CAPZA1	101.887	-0.240595	0.395227	0.367828	0.544191	1
MOV10	9.14503	0.140466	0.952866	0.0220036	0.882078	1
AL603832.1	0.28477	1.85029	4.46161	0.14115	0.70714	1
RHOC	97.6878	-1.44924	0.431389	10.9388	0.00094172	0.0529755
PPM1J	0
AL603832.2	0.0750874	0.138414	4.54281	-0.186185	1	1
TAFA3	0
LINC01356	0
LINC01357	0
SLC16A1	12.2523	-0.644185	0.879435	0.560889	0.453902	1
SLC16A1-AS1	15.5552	1.5389	0.843005	3.47684	0.0622335	0.644692
AL390242.1	0.0750874	0.138414	4.54281	-0.186185	1	1
LRIG2-DT	1.33457	-0.958824	2.32782	0.238423	0.625347	1
LRIG2	8.92704	1.5475	0.972952	2.66984	0.102267	0.784984
MAGI3	2.29741	0.630751	1.96264	0.108605	0.741738	1
PHTF1	27.2448	-0.118971	0.631466	0.0451887	0.831657	1
RSBN1	22.5531	0.23843	0.704434	0.115037	0.734481	1
AL137856.1	16.2073	-0.984425	0.781379	1.62437	0.202483	0.994845
PTPN22	142.48	-1.2664	0.362416	11.4639	0.000709613	0.043408
AP4B1-AS1	1.71815	-0.27503	2.25389	0.0551503	0.814332	1
BCL2L15	0.179929	1.3255	4.47811	-0.021884	1	1
AP4B1	10.7788	-0.897523	0.929464	0.890276	0.345403	1
DCLRE1B	2.40809	-1.49423	1.85448	0.730061	0.392863	1
HIPK1-AS1	0.975224	2.03799	3.2286	0.578717	0.446816	1
HIPK1	41.5509	0.853556	0.543007	2.54585	0.110584	0.805896
OLFML3	0.0750874	0.138414	4.54281	-0.186185	1	1
AL591742.2	0
SYT6	0
AL121999.1	0
TRIM33	38.5846	0.528442	0.530076	1.0276	0.310723	1
BCAS2	37.4747	-0.953225	0.542921	3.08585	0.0789759	0.71137
DENND2C	0.150175	-0.361124	4.53071	-0.0284176	1	1
AMPD1	0
NRAS	22.2373	-0.51547	0.648429	0.63267	0.426378	1
CSDE1	82.9057	0.273698	0.404504	0.479464	0.488665	1
SIKE1	20.573	-0.786505	0.682987	1.28286	0.257368	1
SYCP1	0
TSHB	0
TSPAN2	14.7095	2.16754	0.860408	6.67792	0.00976147	0.246787
LINC01765	1.20563	-0.371125	2.57086	0.0602757	0.806061	1
AL049825.1	0
NGF-AS1	0
NGF	0
AL512638.3	0
VANGL1	16.6284	0.615203	0.718303	0.75262	0.385648	1
CASQ2	0
NHLH2	0
LINC01649	0
SLC22A15	0.0750874	0.138414	4.54281	-0.186185	1	1
AL365318.1	0
MAB21L3	0
LINC01779	0
AL355538.1	0
ATP1A1	41.8421	0.180105	0.499752	0.13418	0.714137	1
ATP1A1-AS1	6.13268	0.469371	1.1735	0.182769	0.669004	1
LINC01762	6.4044	6.71597	1.74915	14.9747	0.000108959	0.0114834
AL136376.1	0
AL390066.1	2.58147	0.961928	1.70751	0.33189	0.564548	1
AL390066.2	0
CD58	67.0254	-0.394589	0.422535	0.865013	0.35234	1
IGSF3	0.302123	-0.160642	4.53514	0.0265477	0.87057	1
C1orf137	0
CD2	428.252	0.269318	0.318558	0.731166	0.392506	1
AL157904.1	0
PTGFRN	0.679334	-1.93887	3.64238	0.446474	0.504014	1
CD101	0
AL445231.1	0.150175	-0.361124	4.53071	-0.0284176	1	1
TTF2	16.4533	0.0373804	0.733669	0.00850664	0.926514	1
TRIM45	0
VTCN1	0
LINC01525	0.0750874	0.138414	4.54281	-0.186185	1	1
AL358072.1	0
MAN1A2	54.0349	0.696672	0.452928	2.42278	0.119582	0.836169
AL157902.1	0
TENT5C	114.052	-1.93839	0.394514	22.888	1.71718e-06	0.000455184
GDAP2	14.6222	0.539021	0.765495	0.509034	0.475557	1
WDR3	7.99832	1.21609e-05	1.07075	0.0517093	0.820115	1
SPAG17	0
AL391557.1	0
TBX15	0
AL139420.1	0
AL139420.2	0
WARS2	15.9163	-1.55015	0.828893	3.30931	0.0688885	0.677375
WARS2-IT1	0.255016	0.825954	4.46583	-0.0433742	1	1
WARS2-AS1	12.3348	0.881407	0.892902	1.09872	0.294548	1
AL359915.1	0
LINC01780	0
HAO2	0
HAO2-IT1	0
HSD3B2	0
HSD3B1	0
LINC00622	0
ZNF697	0
PHGDH	4.14221	-0.953778	1.51121	0.457613	0.498741	1
HMGCS2	0.302123	-0.160642	4.53514	0.0265477	0.87057	1
REG4	0.104841	2.19459	4.49154	0.118169	0.731028	1
ADAM30	0
NOTCH2	17.4028	0.651872	0.706481	0.886951	0.346305	1
AC245008.1	0
SEC22B	16.6227	-0.229097	0.741223	0.102117	0.749303	1
AC253572.1	0
NBPF26	12.5453	2.79883	0.997523	8.22624	0.00412889	0.142195
AC253572.2	9.73217	-0.705586	1.14044	0.346682	0.555997	1
PPIAL4A	0.104841	2.19459	4.49154	0.118169	0.731028	1
LINC00623	21.3833	0.367424	0.662134	0.324458	0.568941	1
FCGR1B	0
AC244453.3	0
AC244453.2	0
AC244453.1	0
FAM72B	4.21264	0.893466	1.4115	0.418339	0.517767	1
SRGAP2C	15.703	1.06186	0.763127	1.98949	0.158394	0.923812
SRGAP2-AS1	0.104841	2.19459	4.49154	0.118169	0.731028	1
LINC02798	4.94086	0.386614	1.32576	0.127132	0.721424	1
AL592494.1	0
AL592494.2	0
LINC01691	0.0750874	0.138414	4.54281	-0.186185	1	1
LINC02799	0
AC239800.2	0.150175	-0.361124	4.53071	-0.0284176	1	1
LINC02591	3.14547	1.40033	1.66869	0.747664	0.387217	1
HIST2H3PS2	0.179929	1.3255	4.47811	-0.021884	1	1
AC246680.1	0
FAM72C	0.929891	3.8897	3.21839	1.89	0.169202	0.934111
IGKV1OR1-1	0
LINC02802	4.42267	-1.0263	1.44314	0.558683	0.454792	1
PPIAL4E	0
AC246785.3	0.314524	3.06619	4.46692	0.623672	0.429686	1
NBPF15	12.5417	0.122737	0.850179	0.0264921	0.870704	1
PPIAL4F	0
LINC01632	0
FP700111.1	0.104841	2.19459	4.49154	0.118169	0.731028	1
SRGAP2B	10.0666	1.48632	0.892686	2.86549	0.0904981	0.744019
FAM72D	0
PPIAL4D	0
AC245014.3	6.95656	-2.69905	1.35883	3.91835	0.0477616	0.577065
AC245014.1	0
NBPF20	1.34448	0.391616	2.36042	0.03404	0.853622	1
AC239860.4	0
GPR89A	6.97498	0.0258702	1.16028	0.0441987	0.833484	1
PDZK1	0.179929	1.3255	4.47811	-0.021884	1	1
CD160	0.357371	1.55122	4.4538	0.0618671	0.803569	1
RNF115	60.5884	-0.603708	0.460829	1.67911	0.195043	0.982639
POLR3C	14.9339	-0.554417	0.781457	0.490116	0.483876	1
NUDT17	0.400218	0.204914	4.41809	-0.0338676	1	1
PIAS3	5.50554	1.06594	1.23573	0.794302	0.372802	1
ANKRD35	0.375437	-1.3059	4.49302	0.189594	0.663255	1
ITGA10	0.82505	3.55103	3.70917	1.34627	0.245932	1
AC243547.1	0
PEX11B	8.57102	-0.0614792	1.03268	0.0381029	0.845237	1
RBM8A	112.355	-0.934318	0.395396	5.5593	0.0183828	0.348807
LIX1L-AS1	4.16345	-0.806633	1.49734	0.369833	0.543095	1
LIX1L	16.3078	0.00161396	0.865015	0.0636447	0.800825	1
ANKRD34A	0.475305	-0.0714129	3.72774	-0.00608103	1	1
AC243547.2	0
POLR3GL	48.188	-0.176355	0.512693	0.138725	0.709551	1
TXNIP	172.81	1.96782	0.406565	24.2271	8.56181e-07	0.000258257
HJV	0
AC239799.2	6.03819	1.88191	1.29835	2.24991	0.133622	0.873158
LINC01719	0.147688	-0.160642	4.53514	-0.0797122	1	1
NBPF10	6.10462	1.84887	1.2123	2.44811	0.117666	0.828333
NOTCH2NLA	0.612387	1.04067	3.34777	0.0723712	0.787915	1
AC239799.1	0
PPIAL4H	0
AC245407.2	0.86989	0.776903	3.21317	0.0520393	0.819552	1
NBPF12	8.87209	2.24807	0.980921	5.45585	0.0195029	0.360141
AC244394.2	0
PRKAB2	5.6441	0.372476	1.17554	0.115944	0.733476	1
AC242426.2	5.30566	0.891445	1.22498	0.554696	0.456405	1
FMO5	1.77874	1.96918	2.18654	0.937679	0.332876	1
CHD1L	3.1041	0.142978	1.6523	0.0490061	0.824802	1
LINC00624	0.599295	2.68875	3.71741	0.674635	0.41144	1
BCL9	0.807895	-0.227037	3.01925	0.0381913	0.84506	1
ACP6	4.84465	0.89751	1.35068	0.554671	0.456415	1
AC241644.1	0
GJA5	0
AC241644.3	0
AC241644.2	0
GJA8	0
GPR89B	9.88795	1.39583	0.906725	2.45855	0.116887	0.825427
AC239803.1	0
LINC02804	0.104841	2.19459	4.49154	0.118169	0.731028	1
NBPF11	4.6908	1.56931	1.27384	1.56897	0.210357	1
LINC02805	0
AC239809.3	0
LINC01731	0
LINC01138	23.3574	1.87526	0.643841	8.90928	0.00283725	0.107908
LINC02806	0
AC245100.1	0
AC245100.6	0
PPIAL4G	0.314524	3.06619	4.46692	0.623672	0.429686	1
NBPF14	15.4125	1.78957	0.749944	5.96248	0.0146134	0.309518
NOTCH2NLB	0
NUDT4B	0
PDE4DIP	17.9305	0.562098	0.707765	0.659132	0.416867	1
AC239802.1	0
AC239802.2	0
AC239804.1	0
NBPF9	3.00947	2.57237	1.68525	2.45423	0.117209	0.82651
AC245297.3	11.8431	0.783945	0.844521	0.890349	0.345383	1
AC245297.2	0
NOTCH2NLC	2.53773	0.304048	1.90141	0.0686403	0.793327	1
NBPF19	6.2069	2.34654	1.15563	4.26465	0.0389132	0.523279
PPIAL4C	0
AC242842.1	0.494453	2.46677	4.01125	0.467413	0.49418	1
FCGR1A	0
HIST2H2BF	4.25586	1.7219	1.34945	1.67339	0.195805	0.98437
AC243772.2	0
HIST2H3D	0.37295	-1.27738	4.4939	0.17736	0.673652	1
HIST2H4A	0.104841	2.19459	4.49154	0.118169	0.731028	1
HIST2H3C	0
HIST2H2AA3	0.104841	2.19459	4.49154	0.118169	0.731028	1
HIST2H2AA4	1.60307	2.44722	2.41578	1.0232	0.31176	1
HIST2H3A	0
HIST2H4B	0
AC239868.1	0.297863	-1.02481	4.50245	0.114593	0.734975	1
HIST2H2BE	1.82971	-2.17941	2.12799	1.16352	0.280736	1
HIST2H2AC	23.2786	0.449224	0.678712	0.4481	0.503239	1
HIST2H2AB	1.82705	2.28924	2.07972	1.28886	0.256258	1
BOLA1	4.2989	0.447167	1.32281	0.117083	0.73222	1
SV2A	1.25999	2.19943	2.63327	0.7917	0.373587	1
SF3B4	39.3362	-0.541331	0.565666	0.982405	0.321606	1
MTMR11	0.0750874	0.138414	4.54281	-0.186185	1	1
OTUD7B	12.1292	-0.318455	0.897924	0.135207	0.713093	1
AC244033.2	1.62163	2.58265	2.2746	1.17624	0.278123	1
VPS45	13.1752	0.284386	0.827507	0.135204	0.713096	1
PLEKHO1	36.9115	0.0754944	0.527863	0.0278203	0.867532	1
AC242988.2	0
ANP32E	91.646	-0.403764	0.392896	1.02509	0.311316	1
AC242988.1	0
CA14	4.35966	-4.66757	2.04765	4.96621	0.0258472	0.425797
APH1A	40.8802	-1.13087	0.557135	4.21961	0.0399593	0.530134
C1orf54	1.96005	-1.1367	1.99357	0.392108	0.531193	1
CIART	0
MRPS21	83.07	-0.29268	0.398075	0.545068	0.46034	1
PRPF3	18.3566	0.823067	0.737879	1.34657	0.245879	1
RPRD2	33.3445	0.900953	0.552679	2.74923	0.0973014	0.769669
TARS2	5.77513	-0.043739	1.17335	0.0128522	0.909739	1
ECM1	1.88673	-1.02115	2.13345	0.276293	0.599141	1
FALEC	0.104841	2.19459	4.49154	0.118169	0.731028	1
AL356356.1	0.150175	-0.361124	4.53071	-0.0284176	1	1
ADAMTSL4	0.225262	-0.760139	4.513	0.0631036	0.801656	1
ADAMTSL4-AS1	12.1267	0.664268	1.14183	0.38593	0.534447	1
MCL1	206.763	-0.707094	0.33267	4.47861	0.0343216	0.492177
ENSA	96.3848	-0.831924	0.436161	3.64398	0.0562724	0.612612
GOLPH3L	5.6804	1.23167	1.16116	1.16123	0.28121	1
HORMAD1	0.104841	2.19459	4.49154	0.118169	0.731028	1
CTSS	39.7616	0.146525	0.552631	0.106672	0.743965	1
CTSK	2.06946	5.09969	2.338	5.09969	0.0239301	0.409447
ARNT	19.477	0.449157	0.668434	0.461377	0.496981	1
CTXND2	0
SETDB1	10.6792	0.753596	0.877437	0.756486	0.384431	1
CERS2	33.7342	-0.141606	0.576509	0.111542	0.738395	1
AL590133.2	0.104841	2.19459	4.49154	0.118169	0.731028	1
AL590133.1	0.147688	-0.160642	4.53514	-0.0797122	1	1
ANXA9	0.104841	2.19459	4.49154	0.118169	0.731028	1
MINDY1	0.747675	-2.15572	3.17686	0.670024	0.413043	1
PRUNE1	3.23353	1.7259	1.51955	1.35353	0.244662	1
BNIPL	0.104841	2.19459	4.49154	0.118169	0.731028	1
C1orf56	0.614874	0.98464	3.6746	0.0479293	0.826707	1
CDC42SE1	98.3767	0.689541	0.423644	2.76609	0.0962814	0.766611
MLLT11	2.49024	2.05112	2.03121	1.08932	0.296621	1
GABPB2	13.3397	1.49208	0.81262	3.50166	0.0613073	0.639578
AL592424.1	0
SEMA6C	0
TNFAIP8L2	9.50807	2.41954	0.963166	6.6391	0.00997644	0.249696
SCNM1	34.0414	-0.456577	0.552681	0.713364	0.398329	1
LYSMD1	0.82505	3.55103	3.70917	1.34627	0.245932	1
TMOD4	0
VPS72	15.901	0.602132	0.746111	0.6777	0.41038	1
PIP5K1A	16.0035	0.757091	0.748714	1.08698	0.297142	1
PSMD4	66.5599	-0.86731	0.479417	3.31256	0.0687522	0.677263
ZNF687-AS1	1.39367	-1.13149	2.52097	0.289878	0.590299	1
ZNF687	2.83153	1.91044	1.73966	1.30361	0.253554	1
PI4KB	19.1678	0.5272	0.687915	0.618328	0.431669	1
AL391069.3	0
RFX5	13.0957	-0.0745867	0.808734	0.0117893	0.913537	1
AL391069.1	0
AL391069.2	0.150175	-0.361124	4.53071	-0.0284176	1	1
SELENBP1	0.659495	0.452879	3.34562	-0.0221595	1	1
PSMB4	61.0408	-0.632304	0.442192	1.99417	0.157905	0.923382
POGZ	29.934	0.288041	0.586546	0.280239	0.596544	1
CGN	0
TUFT1	0.0750874	0.138414	4.54281	-0.186185	1	1
AL365436.2	0.147688	-0.160642	4.53514	-0.0797122	1	1
SNX27	18.6633	0.513834	0.692405	0.571649	0.449604	1
AL391335.1	0
CELF3	0
AL589765.1	0
RIIAD1	0
AL589765.7	0.314524	3.06619	4.46692	0.623672	0.429686	1
MRPL9	28.4747	-1.12532	0.665602	2.98182	0.0842044	0.726051
OAZ3	0.507546	0.682237	3.60077	-0.00258739	1	1
AL589765.4	0
AL589765.2	0
AL589765.5	0
TDRKH	0.794803	1.00364	3.32672	0.0825536	0.773866	1
TDRKH-AS1	0.400218	0.204914	4.41809	-0.0338676	1	1
AL589765.6	0
LINGO4	0
RORC	0
C2CD4D	0.389612	2.1975	4.41716	0.274884	0.600074	1
[truncated: 34,602 more rows]

## Sheet: Liver_MART1_Spleen_MART1
	baseMean	log2FoldChange	lfcSE	stat	pvalue	padj
MIR1302-2HG	0
FAM138A	0
OR4F5	0
AL627309.1	0.0230464	0.538212	4.43547	-0.465678	1
AL627309.3	0.0230464	0.538212	4.43547	-0.465678	1
AL627309.2	0
AL627309.5	0.0460929	0.14051	4.42785	-0.298021	1
AL627309.4	0
AP006222.2	0
AL732372.1	0
OR4F29	0
AC114498.1	0
OR4F16	0
AL669831.2	0
LINC01409	3.60105	-1.45842	1.91806	0.65857	0.417065
FAM87B	0.0591186	1.73999	4.44889	-0.172035	1
LINC01128	5.63843	2.08944	1.59127	1.67819	0.195166
LINC00115	0.880567	1.99243	3.11641	0.459421	0.497895
FAM41C	0.782371	0.482594	3.29486	0.00929824	0.923181
AL645608.6	0.0230464	0.538212	4.43547	-0.465678	1
AL645608.2	0
AL645608.4	0
LINC02593	0
SAMD11	0.0591186	1.73999	4.44889	-0.172035	1
NOC2L	26.7502	1.65761	1.19302	1.82335	0.176915	0.675531
KLHL17	4.92947	-2.09322	1.62712	1.77353	0.182945
PLEKHN1	3.67394	-0.00581305	1.80908	0.00149912	0.969115
PERM1	0.0591186	1.73999	4.44889	-0.172035	1
AL645608.7	0.141284	1.31333	4.42495	-0.0529918	1
HES4	59.2254	6.571	1.20582	21.2257	4.08261e-06	0.00302022
ISG15	535.535	2.06449	0.856181	4.98934	0.025504	0.522744
AL645608.1	0.16433	0.91563	4.41731	-0.0837869	1
AGRN	1.14109	-0.334287	2.85072	0.0342744	0.853124
AL645608.5	0
AL645608.8	0.0821651	1.00995	4.42846	-0.197101	1
RNF223	0
C1orf159	3.83847	-0.120069	1.78729	0.0198172	0.888049
AL390719.3	0.0460929	0.14051	4.42785	-0.298021	1
LINC01342	0
AL390719.2	0
TTLL10-AS1	0
TTLL10	0.0230464	0.538212	4.43547	-0.465678	1
TNFRSF18	24.107	3.8114	1.20143	8.49187	0.00356738	0.231343
TNFRSF4	8.00793	3.22548	1.48889	4.26148	0.038986
SDF4	63.0833	2.0537	1.16168	2.77793	0.0955715	0.647566
B3GALT6	8.32968	1.11087	1.45312	0.609027	0.435154
C1QTNF12	0.0691393	-0.139337	4.42357	-0.200197	1
AL162741.1	0
UBE2J2	32.398	0.511452	0.95202	0.28394	0.59413	0.865765
LINC01786	0.0230464	0.538212	4.43547	-0.465678	1
SCNN1D	0.338681	0.181944	4.4032	-0.0450192	1
ACAP3	7.70405	-0.795956	1.52446	0.325125	0.568544
PUSL1	3.91562	1.14399	1.78805	0.44098	0.50665
INTS11	27.6936	1.51564	1.18909	1.54616	0.213704	0.6937
AL139287.1	0
CPTP	5.73162	1.15139	1.57852	0.53903	0.462835
TAS1R3	0.128258	0.332397	4.41654	-0.150317	1
DVL1	3.81923	-0.457903	1.82415	0.0675218	0.79498
MXRA8	0.0230464	0.538212	4.43547	-0.465678	1
AURKAIP1	89.2052	1.57915	1.19707	1.5879	0.207627	0.690864
CCNL2	24.108	0.202791	1.31129	0.0304681	0.861432	0.957339
MRPL20-AS1	4.64147	1.83468	1.69088	1.1646	0.280513
MRPL20	87.2566	0.913514	0.86703	1.05084	0.305313	0.732531
AL391244.2	0.118237	2.04338	4.4454	0.060492	0.80572
ANKRD65	0
AL391244.1	0
TMEM88B	0
LINC01770	0
VWA1	0
ATAD3C	0.105212	0.612244	4.42082	-0.177211	1
ATAD3B	8.79372	0.809133	1.40334	0.33867	0.560598
ATAD3A	6.7669	1.03896	1.49137	0.498733	0.480057
TMEM240	0.0230464	0.538212	4.43547	-0.465678	1
SSU72	64.3404	1.69717	1.26662	1.62708	0.202108	0.690864
AL645728.1	2.00257	2.64506	2.54928	1.10805	0.292506
FNDC10	3.13781	2.2981	2.05013	1.26173	0.261324
AL691432.4	0
AL691432.2	1.64991	1.08367	2.5154	0.201949	0.653152
MIB2	22.4313	-0.393593	1.28914	0.0998799	0.751974	0.924758
MMP23B	0.39179	-1.64348	4.41046	0.316825	0.573522
CDK11B	25.0059	-0.663997	0.986215	0.464242	0.495648	0.823929
FO704657.1	0.0921858	-0.356952	4.42076	-0.128313	1
SLC35E2B	8.07106	-2.38009	1.59731	2.51236	0.112956
CDK11A	33.3983	-0.451309	0.948792	0.230172	0.631396	0.880677
SLC35E2A	10.2969	-3.25472	1.402	5.38874	0.0202671
NADK	12.4493	-0.0775639	1.36824	0.0127461	0.910111	0.971699
GNB1	134.065	-0.614695	0.82958	0.56176	0.453552	0.806486
AL109917.1	0.0230464	0.538212	4.43547	-0.465678	1
CALML6	0
TMEM52	0.200402	1.54037	4.42274	0.0421664	0.837303
CFAP74	0
AL391845.2	0
GABRD	0
AL391845.1	0.0591186	1.73999	4.44889	-0.172035	1
PRKCZ	6.06949	1.44916	1.53458	0.897118	0.343556
AL590822.2	0.538881	1.93405	4.15084	0.264203	0.607247
PRKCZ-AS1	0.0230464	0.538212	4.43547	-0.465678	1
FAAP20	49.6983	1.45796	1.18809	1.40573	0.235767	0.708157
AL590822.1	0.0230464	0.538212	4.43547	-0.465678	1
SKI	55.1505	1.24734	1.23033	0.975228	0.32338	0.743975
AL590822.3	0.513032	-0.127737	4.1417	-0.00278843	1
MORN1	0.72646	0.468789	3.62862	0.0310549	0.860118
AL589739.1	0
AL513477.2	0.0460929	0.14051	4.42785	-0.298021	1
RER1	75.4997	0.210669	0.866587	0.0586002	0.808722	0.938552
PEX10	4.0573	1.13402	1.7989	0.404188	0.524934
PLCH2	7.29596	1.06306	1.46856	0.540698	0.462144
AL139246.1	0.0821651	1.00995	4.42846	-0.197101	1
AL139246.4	0
PANK4	4.48862	-0.384265	1.80573	0.0911654	0.762701
HES5	0
AL139246.5	6.75632	0.796678	1.53517	0.276058	0.599297
TNFRSF14-AS1	3.53691	0.504673	1.96036	0.122722	0.726101
TNFRSF14	53.265	1.93433	1.1568	2.52466	0.112079	0.651212
AL139246.3	0.384774	-0.0412496	4.40138	-0.029669	1
PRXL2B	5.71779	1.52566	1.5618	0.955792	0.328249
MMEL1	0.654113	0.668165	3.84358	0.0267238	0.870145
AL831784.1	0
TTC34	0.0691393	-0.139337	4.42357	-0.200197	1
AC242022.2	0
AC242022.1	0
AL592464.2	0
AL592464.3	0
AL592464.1	0
AL589702.1	0
ACTRT2	0
PRDM16-DT	0
PRDM16	0
AL008733.1	0
AL590438.1	0
AL354743.2	0
AL354743.1	0
ARHGEF16	0
AL512413.1	0
MEGF6	0.690186	1.02842	3.44568	0.0888837	0.765601
AL513320.1	0.105212	0.612244	4.42082	-0.177211	1
TPRG1L	10.4489	0.762942	1.37089	0.326427	0.567771
WRAP73	12.9138	0.805684	1.3112	0.384092	0.535421	0.83839
TP73	7.73009	-1.50401	1.49617	0.967248	0.325368
AL136528.1	0.0691393	-0.139337	4.42357	-0.200197	1
AL136528.2	0
CCDC27	0.0691393	-0.139337	4.42357	-0.200197	1
SMIM1	1.04305	1.91831	3.01037	0.636473	0.424991
LRRC47	15.748	-0.887781	1.09286	0.665026	0.414791	0.789937
AL365330.1	0.0230464	0.538212	4.43547	-0.465678	1
CEP104	20.6979	0.0685217	1.09866	0.0125816	0.910691	0.971779
DFFB	1.7393	-0.0255775	2.43113	0.0299365	0.862634
C1orf174	10.8246	1.72463	1.3663	1.55123	0.212954	0.6937
LINC01134	0.105212	0.612244	4.42082	-0.177211	1
LINC01346	0
LINC01345	0
LINC02780	0
AL805961.1	0
LINC01777	0
AL355602.1	0
Z98747.1	0
LINC01646	0
AJAP1	0
Z98886.1	0
BX005132.1	0
LINC02781	0
LINC02782	0
AL139823.1	0
Z98259.3	0
Z98259.2	0
Z98259.1	0
AL365255.1	0.806626	-2.62679	3.74483	0.842166	0.358778
NPHP4	4.28552	0.901299	1.85155	0.245977	0.619922
KCNAB2	91.9547	-1.04793	0.900683	1.40232	0.236336	0.708157
CHD5	0.0460929	0.14051	4.42785	-0.298021	1
RPL22	411.143	1.12298	0.805329	1.80865	0.17867	0.675531
AL031847.1	0
RNF207	2.02767	1.39686	2.327	0.383563	0.535703
ICMT	10.3376	0.176029	1.38471	0.0175444	0.894624
LINC00337	0.16433	0.91563	4.41731	-0.0837869	1
HES3	0
GPR153	4.03726	1.44753	1.79106	0.656449	0.417816
ACOT7	29.4973	1.95138	1.19129	2.47306	0.115812	0.651212
AL031848.2	0.598	2.15981	3.64635	0.393506	0.530462
HES2	0
ESPN	0.141284	1.31333	4.42495	-0.0529918	1
AL031848.1	0
TNFRSF25	5.11363	0.230504	1.6274	0.0270033	0.869474
PLEKHG5	1.00698	1.412	3.07445	0.416631	0.518623
NOL9	11.9437	-0.993477	1.26521	0.661608	0.415993	0.789937
TAS1R1	0.0460929	0.14051	4.42785	-0.298021	1
ZBTB48	7.82502	1.08292	1.4507	0.576968	0.447503
KLHL21	4.97174	0.429385	1.68057	0.0954236	0.757392
PHF13	3.51793	1.03871	2.06228	0.285515	0.593109
THAP3	3.30239	-0.0185141	1.867	0.00732034	0.931817
DNAJC11	5.63613	-0.370023	1.77018	0.0970619	0.755384
LINC01672	0
AL591163.1	0
CAMTA1-DT	0.661331	-0.906512	3.74567	0.154054	0.694691
CAMTA1	26.2735	0.520436	1.24387	0.175455	0.675309	0.896248
AL512330.1	0
CAMTA1-IT1	0
Z97987.1	0
AL365194.1	0
AL359881.3	0
AL359881.2	0
AL359881.1	0
VAMP3	7.30458	0.316442	1.51423	0.0446732	0.832606
Z98884.2	0
PER3	0.72646	0.468789	3.62862	0.0310549	0.860118
Z98884.1	0.105212	0.612244	4.42082	-0.177211	1
UTS2	0.138279	-0.687734	4.4172	-0.020223	1
TNFRSF9	143.584	2.1203	0.843946	5.40696	0.0200566	0.486779
PARK7	315.288	1.34661	0.821005	2.45619	0.117062	0.651212
AL034417.4	0.503011	0.294312	4.17511	-0.0136205	1
AL034417.3	0.0821651	1.00995	4.42846	-0.197101	1
ERRFI1	3.02879	3.96385	2.01823	3.31879	0.0684922
AL034417.2	0
LINC01714	0
AL358876.2	0
SLC45A1	0.128258	0.332397	4.41654	-0.150317	1
RERE	20.6188	-0.336667	1.29384	0.0733049	0.786584	0.933027
RERE-AS1	0.0821651	1.00995	4.42846	-0.197101	1
AL357552.2	0.0230464	0.538212	4.43547	-0.465678	1
ENO1	377.856	-0.113633	0.890699	0.0164091	0.898071	0.969808
ENO1-AS1	0.16433	0.91563	4.41731	-0.0837869	1
CA6	2.06089	-3.27877	2.46338	2.07227	0.149998
SLC2A7	0
SLC2A5	0
GPR157	0.128258	0.332397	4.41654	-0.150317	1
MIR34AHG	1.56494	0.135543	2.52395	0.0255434	0.873021
LNCTAM34A	0.259521	1.72297	4.42118	0.113923	0.735721
H6PD	4.62549	0.343206	1.77866	0.0525839	0.818627
SPSB1	7.15642	-3.70353	1.91307	4.05881	0.0439413
BX323043.1	0
LINC02606	0.0230464	0.538212	4.43547	-0.465678	1
AL928921.1	0
SLC25A33	19.1666	2.49874	1.2101	3.91289	0.0479171	0.589306
TMEM201	4.17268	2.57163	1.7978	1.95009	0.162577
PIK3CD	70.6159	-1.33082	0.935759	2.10918	0.146418	0.661495
PIK3CD-AS1	0.279562	-0.0450927	4.40542	-0.0521652	1
PIK3CD-AS2	2.09612	2.04285	2.42288	0.792464	0.373356
CLSTN1	35.6025	-0.804785	0.964048	0.729947	0.3929	0.778034
CTNNBIP1	14.9762	-0.709594	1.13163	0.409885	0.522028	0.833692
AL357140.1	0
AL357140.4	0.0460929	0.14051	4.42785	-0.298021	1
LZIC	14.2793	0.999587	1.30484	0.585974	0.44398	0.800553
AL357140.2	0.0230464	0.538212	4.43547	-0.465678	1
NMNAT1	1.92182	-0.657234	2.39721	0.0515531	0.820382
AL603962.1	0
RBP7	0.0591186	1.73999	4.44889	-0.172035	1
UBE4B	24.6687	-0.374341	1.28304	0.0904576	0.763596	0.92858
KIF1B	16.1641	-0.221664	1.31447	0.0332138	0.855389	0.955349
AL139424.3	0
AL139424.2	0.0691393	-0.139337	4.42357	-0.200197	1
PGD	44.7599	2.56146	1.15722	4.25577	0.0391172	0.561499
AL139424.1	0
CENPS	6.3959	1.98381	1.54758	1.60697	0.204919
CORT	0.0921858	-0.356952	4.42076	-0.128313	1
DFFA	12.3954	1.0615	1.31169	0.659987	0.416565	0.789937
AL354956.1	0
PEX14	18.6383	-0.0049445	1.30561	0.00651143	0.935686	0.972314
AL139423.2	0.0921858	-0.356952	4.42076	-0.128313	1
CASZ1	11.4314	-0.401662	1.40741	0.0959072	0.756798	0.927265
AL139423.1	0.523053	-0.527057	4.10977	0.0464834	0.829299
C1orf127	0
TARDBP	18.9499	0.533837	1.29702	0.170475	0.67969	0.897768
MASP2	0
AL109811.2	0.289583	-0.667745	4.40643	0.0298431	0.862847
SRM	45.0668	2.84666	1.14866	5.23767	0.0221029	0.498546
EXOSC10	24.0285	-0.283881	1.05112	0.073346	0.786526	0.933027
AL109811.1	0.338681	0.181944	4.4032	-0.0450192	1
EXOSC10-AS1	0.0460929	0.14051	4.42785	-0.298021	1
MTOR	19.9453	-0.0956209	1.05776	0.00826078	0.927581	0.972314
MTOR-AS1	0
ANGPTL7	0
UBIAD1	5.44544	1.16096	1.5874	0.545962	0.459972
AL031291.1	0
DISP3	0.0230464	0.538212	4.43547	-0.465678	1
AL590989.1	0.515835	2.67087	4.44003	0.421863	0.516009
LINC01647	0
AL031731.1	0
FBXO2	17.3876	3.96147	1.30178	7.85875	0.00505752	0.271556
FBXO44	15.3941	0.365539	1.11765	0.103555	0.747604	0.922794
FBXO6	24.5625	0.329167	1.03213	0.109502	0.740711	0.921666
MAD2L2	39.3569	1.07556	1.00953	1.06268	0.302605	0.729145
DRAXIN	1.33368	2.42797	2.93077	0.808082	0.368688
AGTRAP	60.9623	0.612088	0.960471	0.390412	0.532083	0.836957
C1orf167	0.0591186	1.73999	4.44889	-0.172035	1
AL953897.1	0
MTHFR	6.31045	-1.17325	1.61747	0.603473	0.437256
CLCN6	3.01185	-0.173481	2.03979	0.0587468	0.808488
NPPA	0.0460929	0.14051	4.42785	-0.298021	1
NPPB	0
AL021155.5	1.85052	0.722911	2.38827	0.130425	0.717991
KIAA2013	44.7251	0.161401	0.940022	0.0317531	0.858571	0.956068
PLOD1	6.05632	0.645392	1.55307	0.185203	0.66694
AL096840.2	0.0591186	1.73999	4.44889	-0.172035	1
MFN2	10.0931	0.50765	1.374	0.140451	0.707833
MIIP	36.2874	0.199411	1.0238	0.0448824	0.83222	0.947032
TNFRSF8	4.09984	3.96084	2.21121	2.73451	0.0982019
AL357835.1	0
TNFRSF1B	288.853	1.15748	0.831318	1.7986	0.179882	0.675531
VPS13D	31.9111	-0.677547	1.01852	0.470615	0.492704	0.822189
LINC02766	0.0230464	0.538212	4.43547	-0.465678	1
DHRS3	0.361727	0.0644286	4.4022	-0.0380478	1
AC254633.1	0
AADACL4	0
AADACL3	0
C1orf158	0
PRAMEF12	0
PRAMEF1	0
LINC01784	0
PRAMEF11	0
HNRNPCL1	0.0591186	1.73999	4.44889	-0.172035	1
PRAMEF2	0
PRAMEF4	0
PRAMEF10	0
PRAMEF7	0
PRAMEF6	0
PRAMEF27	0
HNRNPCL3	0
PRAMEF25	0
HNRNPCL2	0
AC245056.1	0
PRAMEF26	0
HNRNPCL4	0
PRAMEF9	0
PRAMEF13	0
PRAMEF18	0
PRAMEF5	0
PRAMEF8	0
PRAMEF33	0
PRAMEF15	0
AC243961.1	0
PRAMEF14	0
PRAMEF19	0
PRAMEF17	0
PRAMEF20	0
LRRC38	0
AL354712.1	0
PDPN	0.0460929	0.14051	4.42785	-0.298021	1
AL359771.1	0
PRDM2	48.1741	0.121519	0.964548	0.0193499	0.889368	0.967592
KAZN	1.15111	-0.704206	2.87024	0.0939218	0.759249
AL357873.1	0
KAZN-AS1	0.0230464	0.538212	4.43547	-0.465678	1
AL031293.1	0
TMEM51-AS1	0
TMEM51	0
C1orf195	0
FHAD1	0.0230464	0.538212	4.43547	-0.465678	1
AL031283.2	0.0460929	0.14051	4.42785	-0.298021	1
AL031283.3	0
AL031283.1	0.105212	0.612244	4.42082	-0.177211	1
EFHD2	269.909	-0.329123	0.854339	0.149934	0.698598	0.904568
CTRC	0.809631	-1.63453	3.45845	0.432758	0.510639
CELA2A	0.0460929	0.14051	4.42785	-0.298021	1
CELA2B	0
CASP9	4.5818	0.778446	1.80238	0.237262	0.62619
DNAJC16	6.53223	0.191141	1.55682	0.0154845	0.90097
AL121992.3	0
AGMAT	5.51949	2.75739	1.7141	2.44347	0.118015
AL121992.1	0.0230464	0.538212	4.43547	-0.465678	1
DDI2	12.0612	0.687284	1.34006	0.266086	0.60597	0.87037
RSC1A1	0
AL121992.2	0
PLEKHM2	13.7745	0.535496	1.32109	0.176179	0.674678	0.896248
AL450998.3	0.901764	1.90783	3.4904	0.562195	0.453377
SLC25A34	0.266537	-0.571673	4.40713	0.00688208	0.933885
SLC25A34-AS1	0
TMEM82	0
FBLIM1	0.141284	1.31333	4.42495	-0.0529918	1
UQCRHL	19.3824	3.00771	1.24303	5.19417	0.0226627	0.498546
AL450998.2	2.42087	-0.966649	2.37638	0.249517	0.617415
SPEN	39.3757	-0.392757	0.928516	0.18432	0.667687	0.894575
ZBTB17	9.48452	0.561635	1.4216	0.167044	0.682752
SRARP	0
AL355994.3	0
HSPB7	0
CLCNKA	0
CLCNKB	0
FAM131C	0
EPHA2	0
AL451042.2	0
AL451042.1	0
ARHGEF19-AS1	0
ARHGEF19	3.4565	0.357548	1.83357	0.0396285	0.842209
AL109627.1	1.08614	0.216413	3.25392	0.0515701	0.820353
CPLANE2	0.345697	-1.52175	4.4111	0.270918	0.602717
FBXO42	19.7651	-0.0749379	1.28521	0.00628847	0.936794	0.972314
SZRD1	44.3918	0.203245	0.907397	0.0499283	0.823188	0.943767
SPATA21	0.24349	-0.465994	4.40796	-0.0170063	1
NECAP2	50.2576	0.236317	0.922483	0.0662443	0.796886	0.936586
LINC01772	0.230464	-1.13948	4.41347	0.132727	0.715621
AL137802.2	0
AL137802.1	0
LINC01783	0
NBPF1	0.703414	0.558472	3.67328	0.0367196	0.848037
AL137798.1	0
AL137798.2	0
AL021920.1	0
AL021920.3	0
CROCC	7.67322	0.273129	1.59374	0.0444373	0.833042
BX284668.1	0
BX284668.2	0.0230464	0.538212	4.43547	-0.465678	1
BX284668.5	0.0230464	0.538212	4.43547	-0.465678	1
BX284668.6	0.513032	-0.127737	4.1417	-0.00278843	1
MFAP2	3.30494	5.38509	2.44563	3.7552	0.0526436
AL049569.2	0
AL049569.1	0.115232	-0.535701	4.41874	-0.0700254	1
ATP13A2	7.17218	-1.13004	1.58289	0.589302	0.442689
SDHB	38.0392	1.68616	1.16779	1.93796	0.163891	0.671911
PADI2	0
LINC02783	0
AL590644.1	0
PADI1	0
PADI3	0
PADI4	0
PADI6	0
RCC2-AS1	0
RCC2	28.9884	-0.433048	0.976625	0.199926	0.654781	0.888431
ARHGEF10L	0
LINC02810	0
ACTL8	0
AL357509.1	0
LINC01654	0
IGSF21	0
IGSF21-AS1	0
AL591896.1	0
KLHDC7A	0
PAX7	0.0230464	0.538212	4.43547	-0.465678	1
TAS1R2	0
ALDH4A1	3.68205	1.46947	2.17887	0.475928	0.490272
IFFO2	23.3128	-1.18441	1.16666	1.10122	0.293999	0.723692
AL137127.1	0.0921858	-0.356952	4.42076	-0.128313	1
UBR4	45.9359	-0.182349	0.95246	0.0405512	0.840407	0.949594
EMC1-AS1	3.20299	0.730117	1.87929	0.155568	0.69327
EMC1	7.11259	0.764482	1.47648	0.280403	0.596437
MRTO4	17.084	2.85782	1.38159	3.80656	0.0510522	0.605467
AKR7A3	0.0230464	0.538212	4.43547	-0.465678	1
AKR7A2	19.0321	2.03216	1.21691	2.61854	0.105622	0.651119
SLC66A1	0.335676	-0.837258	4.4053	0.0731977	0.786737
CAPZB	278.89	0.500151	0.809407	0.371786	0.542033	0.84201
MICOS10	135.682	0.662283	0.859161	0.572623	0.449219	0.804654
AL031727.2	0.436877	2.12532	4.41835	0.263312	0.607854
NBL1	40.5699	4.72873	1.17972	12.56	0.000394099	0.0524783
HTR6	0.0230464	0.538212	4.43547	-0.465678	1
TMCO4	10.9519	-0.0730326	1.38108	0.0120014	0.912765	0.971779
RNF186	0
AL391883.1	0
OTUD3	4.90171	0.907136	1.7975	0.260309	0.609908
PLA2G2E	0
PLA2G2A	0
PLA2G5	0
PLA2G2D	0
PLA2G2F	0
Z98257.1	0
PLA2G2C	0.0460929	0.14051	4.42785	-0.298021	1
UBXN10-AS1	1.25047	0.41755	2.82144	0.0713034	0.789448
UBXN10	0.513032	-0.127737	4.1417	-0.00278843	1
LINC01757	0
Z98257.2	0
VWA5B1	0
AL020998.1	0
LINC01141	0
AL139254.1	0
AL139254.2	0
AL139254.3	0
CAMK2N1	0.703414	0.558472	3.67328	0.0367196	0.848037
MUL1	8.7107	1.84155	1.41495	1.65323	0.19852
FAM43B	0
CDA	0.996954	3.14381	3.30533	1.13972	0.285712
PINK1	6.18388	0.782576	1.55192	0.261448	0.609127
PINK1-AS	1.1932	0.670078	2.79498	0.0644558	0.799587
DDOST	83.6675	0.845774	0.880329	0.873686	0.349937	0.757192
KIF17	0.0821651	1.00995	4.42846	-0.197101	1
SH2D5	0
AL663074.1	0.0230464	0.538212	4.43547	-0.465678	1
HP1BP3	130.438	0.19262	0.839952	0.0522949	0.819117	0.942565
EIF4G3	97.7128	-0.735554	0.886886	0.707656	0.400223	0.782073
AL031005.2	0.0230464	0.538212	4.43547	-0.465678	1
ECE1	40.3577	-0.522742	0.956933	0.312127	0.576378	0.858699
AL031005.1	0
AL031728.1	0.0230464	0.538212	4.43547	-0.465678	1
AL592309.2	0
NBPF3	0.197397	-0.216001	4.41016	-0.0677343	1
ALPL	0
LINC02596	0
RAP1GAP	1.48674	2.08278	2.78429	0.681314	0.409135
USP48	52.5464	1.13103	1.21505	0.826776	0.363206	0.761488
LDLRAD2	0
HSPG2	1.09079	3.77064	3.23232	1.3204	0.25052
CELA3B	0
CELA3A	0
LINC01635	0
LINC00339	3.18615	1.04807	1.89135	0.324824	0.568723
CDC42	211.571	0.0136685	0.831153	0.000406443	0.983915	0.988369
CDC42-AS1	0.671352	-1.31959	3.71719	0.279938	0.596742
CDC42-IT1	0.230464	-1.13948	4.41347	0.132727	0.715621
WNT4	0.151304	0.114782	4.41373	-0.122267	1
AL445253.1	0.0230464	0.538212	4.43547	-0.465678	1
ZBTB40	12.589	-0.887313	1.15729	0.59789	0.439384	0.797715
ZBTB40-IT1	0
EPHA8	0
C1QA	0
C1QC	0
C1QB	0.0230464	0.538212	4.43547	-0.465678	1
EPHB2	0.0691393	-0.139337	4.42357	-0.200197	1
AL512444.1	0
LACTBL1	0
TEX46	0
KDM1A	10.139	0.579691	1.37987	0.179718	0.671615
AL031428.1	2.20182	1.64054	2.29944	0.523032	0.469551
LUZP1	15.7179	1.65284	1.29441	1.57912	0.208888	0.690864
HTR1D	0
LINC01355	0.417841	-0.609543	4.4013	0.0381842	0.845074
AL109936.6	0.105212	0.612244	4.42082	-0.177211	1
HNRNPR	78.1143	0.603555	0.85704	0.480788	0.488065	0.819834
ZNF436	0.608223	0.241826	3.87904	0.00257744	0.95951
ZNF436-AS1	0.200402	1.54037	4.42274	0.0421664	0.837303
AL109936.2	0
TCEA3	3.30494	5.38509	2.44563	3.7552	0.0526436
ASAP3	0.0460929	0.14051	4.42785	-0.298021	1
E2F2	14.2562	-3.63837	1.38901	6.45443	0.0110676	0.409378
AL021154.1	0
ID3	39.3412	6.91554	1.30061	19.7345	8.89799e-06	0.00538571
AL450043.1	0.0591186	1.73999	4.44889	-0.172035	1
MDS2	0.878717	2.68008	3.81137	0.761661	0.382809
RPL11	1371.35	1.55516	0.810634	3.29557	0.069467	0.64455
ELOA-AS1	2.19321	-0.247006	2.24874	0.0543507	0.815659
ELOA	18.1388	1.80166	1.23222	2.04444	0.152763	0.664877
PITHD1	27.2443	2.00844	1.19146	2.6235	0.105292	0.651119
LYPLA2	33.34	1.69565	1.17457	1.94557	0.163065	0.671911
GALE	5.30055	1.74365	1.70766	1.03348	0.309343
HMGCL	9.01763	1.14599	1.50069	0.586678	0.443707
FUCA1	1.79556	1.76503	2.45956	0.556148	0.455816
CNR2	0.197397	-0.216001	4.41016	-0.0677343	1
AL590609.3	0
PNRC2	43.8691	1.35533	1.19512	1.21767	0.269818	0.715256
SRSF10	94.8521	0.682123	0.847733	0.626285	0.428721	0.7928
AL591178.1	0
MYOM3	0
AL591178.2	0
IL22RA1	0.207418	-1.04341	4.41417	0.0993654	0.752592
IFNLR1	3.37559	-1.6396	2.00939	0.797253	0.371916
LINC02800	0
AL138902.1	0
GRHL3	0
STPG1	1.13708	1.20215	2.83942	0.210114	0.646678
NIPAL3	24.256	1.18877	1.2092	0.943186	0.33146	0.747302
RCAN3AS	2.24731	2.06581	2.28689	0.880086	0.348178
RCAN3	26.8861	0.899148	1.08044	0.649969	0.420124	0.790351
NCMAP-DT	0.459923	1.73094	4.33674	0.18113	0.670404
NCMAP	0.0230464	0.538212	4.43547	-0.465678	1
SRRM1	151.811	1.26087	0.829046	2.1412	0.143389	0.661246
AL445648.1	0
CLIC4	4.0312	3.71892	1.96079	3.10967	0.0778285
RUNX3	323.027	0.604581	0.877701	0.4606	0.497344	0.823929
AL445471.1	3.63845	4.29944	1.92193	4.12475	0.0422602
AL445471.2	0
LINC02793	0
AL050344.1	0.0591186	1.73999	4.44889	-0.172035	1
AL031432.1	0
SYF2	79.4189	0.797626	0.861329	0.820169	0.365131	0.763278
AL031432.4	0.141284	1.31333	4.42495	-0.0529918	1
AL031432.5	0
RSRP1	118.983	-0.1031	0.839804	0.0151215	0.902131	0.969808
AL031432.3	0.105212	0.612244	4.42082	-0.177211	1
RHD	0.246495	0.86282	4.4108	-0.0377823	1
TMEM50A	162.004	0.890979	0.826254	1.10179	0.293873	0.723692
RHCE	0.200402	1.54037	4.42274	0.0421664	0.837303
MACO1	33.9422	0.199291	0.962119	0.0437765	0.83427	0.947032
LDLRAP1	7.66477	-0.854338	1.51799	0.360015	0.548498
AL606491.1	0.253511	-1.22759	4.41287	0.16379	0.685691
MAN1C1	0.880769	0.859701	3.37868	0.104103	0.74696
AL031280.1	0
SELENON	2.7619	1.94811	2.16548	0.821916	0.364621
AL020996.1	0
MTFR1L	5.24204	0.93506	1.60317	0.34887	0.554753
AL020996.3	0
AUNIP	0.0691393	-0.139337	4.42357	-0.200197	1
AL033528.2	0.0921858	-0.356952	4.42076	-0.128313	1
PAQR7	0.0230464	0.538212	4.43547	-0.465678	1
STMN1	115.174	1.50679	1.25342	1.31719	0.251096	0.714397
PAFAH2	4.05712	-1.13782	1.90687	0.412007	0.520953
EXTL1	0.878717	2.68008	3.81137	0.761661	0.382809
SLC30A2	0
AL391650.2	0
TRIM63	5.94109	6.29385	2.23063	5.65498	0.0174059
PDIK1L	4.33906	1.81551	1.71693	1.11453	0.2911
FAM110D	0
C1orf232	0
AL391650.1	0.0591186	1.73999	4.44889	-0.172035	1
ZNF593	25.7311	2.2439	1.18539	3.27132	0.070501	0.64455
CNKSR1	0.105212	0.612244	4.42082	-0.177211	1
CATSPER4	0
CEP85	9.45508	-1.11283	1.2547	0.784424	0.375792
SH3BGRL3	2207.48	0.671363	0.834286	0.622656	0.430062	0.79283
UBXN11	18.2573	-0.318554	1.0606	0.0902087	0.763912	0.92858
CD52	1523.44	-0.149106	0.810202	0.0340723	0.853553	0.954157
CRYBG2	1.88639	1.3551	2.38606	0.346169	0.55629
ZNF683	92.0425	3.57861	1.00628	9.40742	0.00216109	0.177637
LIN28A	0
DHDDS	12.329	1.27047	1.30972	0.936406	0.333204	0.747955
AL513365.2	0.220444	-0.348479	4.40895	-0.0418691	1
HMGN2	213.085	1.92008	1.25375	2.04861	0.152345	0.664877
RPS6KA1	55.6821	-1.34144	0.959172	1.97465	0.159956	0.671911
AL512408.1	0.878717	2.68008	3.81137	0.761661	0.382809
ARID1A	43.4767	-1.25061	0.977556	1.71267	0.190639	0.686349
PIGV	3.77213	0.320779	1.77638	0.0362328	0.849035
ZDHHC18	23.2326	0.407688	1.00632	0.162606	0.686769	0.899736
SFN	0
GPN2	7.48614	1.32351	1.4523	0.839847	0.35944
AL034380.1	0
GPATCH3	7.50869	1.37344	1.51863	0.815862	0.366393
NUDC	55.6273	1.99447	1.15453	2.6776	0.101769	0.647566
NR0B2	0
KDF1	0
TRNP1	0
TENT5B	0
SLC9A1	11.0758	1.09265	1.34943	0.665687	0.414559	0.789937
AL590640.1	0
WDTC1	17.6492	-2.22926	1.12274	4.1217	0.0423365	0.5721
TMEM222	15.3457	0.977479	1.30608	0.567591	0.451218	0.805282
SYTL1	62.6362	-0.629536	0.939549	0.459872	0.497684	0.823929
MAP3K6	5.20355	5.39342	1.77825	7.10164	0.00770133
FCN3	0.0230464	0.538212	4.43547	-0.465678	1
CD164L2	0.0591186	1.73999	4.44889	-0.172035	1
GPR3	0.0691393	-0.139337	4.42357	-0.200197	1
WASF2	85.7388	7.72327e-05	0.863441	1.07309e-06	0.999173	0.999173
FO393419.2	0.0691393	-0.139337	4.42357	-0.200197	1
BX293535.1	0.16433	0.91563	4.41731	-0.0837869	1
AHDC1	5.75898	-0.80828	1.70529	0.276902	0.598739
FGR	10.3326	-3.21704	1.61464	3.91272	0.047922
LINC02574	0.0230464	0.538212	4.43547	-0.465678	1
IFI6	388.487	3.53683	1.21939	6.23267	0.0125414	0.440961
AL445490.1	0.0691393	-0.139337	4.42357	-0.200197	1
AL020997.5	0.141284	1.31333	4.42495	-0.0529918	1
FAM76A	8.09557	0.680452	1.44292	0.238686	0.625156
STX12	25.7956	-0.0795836	0.996441	0.00681713	0.934197	0.972314
AL020997.2	0
AL020997.3	0
AL020997.4	0.0460929	0.14051	4.42785	-0.298021	1
PPP1R8	10.7051	0.835899	1.36591	0.377802	0.538782	0.840523
THEMIS2	1.21645	0.116552	2.99283	0.0431123	0.835514
RPA2	26.6558	1.98928	1.1922	2.57302	0.1087	0.651212
SMPDL3B	0.0460929	0.14051	4.42785	-0.298021	1
AL512288.1	0.0691393	-0.139337	4.42357	-0.200197	1
XKR8	5.29795	0.981166	1.60342	0.382186	0.536435
EYA3	20.5254	0.246868	1.2676	0.0413645	0.838836	0.94934
PTAFR	0.197397	-0.216001	4.41016	-0.0677343	1
DNAJC8	95.7565	0.490665	0.856906	0.318609	0.572445	0.857637
ATP5IF1	212.457	0.848881	0.81897	1.02111	0.312255	0.737493
AL353622.1	1.89155	0.53716	2.3869	0.0719433	0.788528
AL353622.2	0
SESN2	15.7956	1.81647	1.29419	1.90023	0.168052	0.673766
MED18	2.42948	0.271118	2.15712	0.0328113	0.856258
PHACTR4	30.294	-0.784428	0.976046	0.670474	0.412886	0.789937
RCC1	7.13689	0.881924	1.53871	0.369778	0.543125
SNHG3	10.6187	0.995636	1.40882	0.501555	0.478818	0.817016
TRNAU1AP	29.516	-0.0274436	0.953383	0.000928283	0.975694	0.985463
SNHG12	45.2749	2.52529	1.14685	4.2365	0.0395636	0.561499
TAF12	21.5739	0.372697	1.0157	0.135024	0.713279	0.909946
RAB42	0
LINC01715	0.105212	0.612244	4.42082	-0.177211	1
AL360012.1	0
GMEB1	11.7431	0.611233	1.38874	0.211685	0.64545	0.88716
YTHDF2	34.6723	1.84782	1.15933	2.3505	0.125243	0.651212
OPRD1	0
AL009181.1	0
EPB41	58.5213	-1.29069	0.921263	2.03513	0.153702	0.665714
TMEM200B	0.937836	2.94009	3.40807	1.01537	0.313619
AL357500.1	0.0691393	-0.139337	4.42357	-0.200197	1
SRSF4	77.8337	0.00741423	0.866586	7.96744e-05	0.992878	0.99512
MECR	8.20624	2.21955	1.54692	1.97131	0.160309
AL590729.1	0
PTPRU	0.937836	2.94009	3.40807	1.01537	0.313619
LINC01756	0
AC092265.1	0
AL645944.2	0
LINC01648	0
AL137076.1	0
AL161638.2	0
AL161638.1	0
MATN1	0.0691393	-0.139337	4.42357	-0.200197	1
MATN1-AS1	0.161325	-0.820212	4.41599	0.0236954	0.877663
AL137857.1	0.118237	2.04338	4.4454	0.060492	0.80572
LAPTM5	435.38	0.512479	0.827659	0.372213	0.5418	0.84201
AL137027.1	0
LINC01778	0
AL445235.1	0
SDC3	0.538881	1.93405	4.15084	0.264203	0.607247
PUM1	49.3213	-0.681752	0.955858	0.533864	0.464987	0.810261
NKAIN1	0.105212	0.612244	4.42082	-0.177211	1
SNRNP40	29.6119	1.94934	1.17512	2.54075	0.110942	0.651212
ZCCHC17	35.5024	0.936841	1.22723	0.565977	0.451862	0.805521
AL451070.1	0.210423	0.418168	4.4102	-0.0867191	1
FABP3	7.51378	5.85958	1.92501	6.65446	0.00989082
SERINC2	0.901764	1.90783	3.4904	0.562195	0.453377
LINC01226	0
AC114488.1	0
TINAGL1	0
HCRTR1	0.0230464	0.538212	4.43547	-0.465678	1
PEF1	24.0374	1.76402	1.19156	2.06601	0.150615	0.664877
AC114488.2	0.0821651	1.00995	4.42846	-0.197101	1
AC114488.3	0
COL16A1	0.937836	2.94009	3.40807	1.01537	0.313619
ADGRB2	0.177356	2.27041	4.44319	0.188912	0.663824
AL354919.2	0
SPOCD1	0
AL354919.1	0
AL136115.2	1.67417	-0.874093	2.4769	0.189184	0.663597
PTP4A2	150.192	-0.200779	0.843132	0.057138	0.811078	0.939796
AL136115.1	0.0591186	1.73999	4.44889	-0.172035	1
AL136115.3	0
KHDRBS1	112.451	0.505533	0.836083	0.356313	0.550561	0.846958
AL445248.1	0.0921858	-0.356952	4.42076	-0.128313	1
TMEM39B	8.28951	1.43785	1.4183	1.02222	0.311993
KPNA6	25.6898	-0.54676	1.01958	0.293867	0.587753	0.862653
AL049795.2	0
TXLNA	22.6146	-0.397346	1.00779	0.157686	0.691296	0.90142
CCDC28B	16.9295	-0.206675	1.42807	0.0213767	0.883757	0.965509
AL049795.1	0
IQCC	0.197397	-0.216001	4.41016	-0.0677343	1
DCDC2B	0.118237	2.04338	4.4454	0.060492	0.80572
TMEM234	5.31999	1.69722	1.60126	1.11676	0.290617
EIF3I	84.0894	2.89863	1.13634	5.35546	0.0206575	0.490644
FAM167B	12.6667	4.58585	1.67515	5.9127	0.0150321	0.462169
LCK	261.156	0.0874855	0.812278	0.0115875	0.914277	0.971779
HDAC1	62.3865	0.234314	0.88945	0.0694214	0.792181	0.934982
MARCKSL1	18.2154	3.34292	1.43311	4.66536	0.0307769	0.532361
AL109945.1	0
TSSK3	0.0691393	-0.139337	4.42357	-0.200197	1
FAM229A	1.38178	-1.24384	2.85727	0.322125	0.570334
BSDC1	24.8206	0.122376	1.00607	0.0159962	0.899355	0.969808
ZBTB8B	0
ZBTB8A	0.253511	-1.22759	4.41287	0.16379	0.685691
ZBTB8OS	40.5913	-0.0967752	0.920453	0.0112484	0.915536	0.971779
RBBP4	61.5017	0.573543	0.89105	0.400871	0.52664	0.835392
SYNC	9.38766	1.94196	1.38057	1.91718	0.166168
AC114489.1	0
KIAA1522	0.538881	1.93405	4.15084	0.264203	0.607247
YARS	63.4909	0.679375	0.878771	0.578401	0.44694	0.803164
S100PBP	26.7598	0.682004	1.22742	0.307349	0.579311	0.859684
FNDC5	0.0230464	0.538212	4.43547	-0.465678	1
HPCA	0.0230464	0.538212	4.43547	-0.465678	1
TMEM54	0.739283	2.07405	3.3317	0.422231	0.515826
AL031602.2	1.42782	0.914574	2.66454	0.166626	0.683128
RNF19B	17.1768	0.571786	1.28765	0.206978	0.649147	0.888431
AL020995.1	1.4669	2.03273	2.63787	0.668075	0.413724
AK2	46.3007	2.60123	1.13421	4.56465	0.0326383	0.543264
AZIN2	3.00283	2.3052	2.12245	1.21666	0.270018
TRIM62	5.48122	-0.127131	1.71081	0.0257964	0.872399
AL662907.3	0.0230464	0.538212	4.43547	-0.465678	1
ZNF362	4.81608	0.335375	1.75729	0.0664853	0.796525
AL513327.3	0
A3GALT2	0.0460929	0.14051	4.42785	-0.298021	1
AL513327.1	0.443893	0.141265	4.3863	-0.0263117	1
PHC2	10.2695	0.838264	1.35799	0.388641	0.533014
AL513327.2	0.0230464	0.538212	4.43547	-0.465678	1
ZSCAN20	0.187377	0.635783	4.41302	-0.0904682	1
CSMD2	0
HMGB4	0
CSMD2-AS1	0
C1orf94	0
AC099565.1	0
SMIM12	32.4956	1.38531	1.1973	1.27231	0.259334	0.714397
GJB5	0
GJB4	0
AL121988.1	0
GJB3	0
GJA4	0
AL122010.1	0
DLGAP3	0.269542	0.645205	4.40798	-0.0487072	1
TMEM35B	52.0465	-0.0106799	0.94495	0.00376307	0.951085	0.973753
ZMYM6	11.2486	0.454012	1.35475	0.115254	0.73424	0.918278
ZMYM1	4.9251	0.103047	1.75316	0.0195122	0.888908
AL590434.1	0
SFPQ	207.099	1.26198	0.819877	2.18193	0.139639	0.656826
ZMYM4	13.8188	-0.383043	1.34998	0.0936636	0.75957	0.928382
ZMYM4-AS1	0.115232	-0.535701	4.41874	-0.0700254	1
KIAA0319L	46.4423	0.0449378	0.926038	0.00424795	0.948034	0.972919
NCDN	17.5126	2.3891	1.23279	3.48297	0.0620032	0.632855
AC004865.2	12.5538	1.85024	1.29491	1.97005	0.160442	0.671911
TFAP2E	3.49277	0.223771	1.83189	0.0255448	0.873017
PSMB2	107.047	0.4091	0.875685	0.213703	0.643881	0.886101
C1orf216	4.59844	0.80021	1.77735	0.224634	0.635531
CLSPN	27.3433	1.49053	1.27238	1.29683	0.254794	0.714397
AL354864.1	0.0230464	0.538212	4.43547	-0.465678	1
AGO4	14.6626	-1.80994	1.20944	2.40613	0.120861	0.651212
AGO1	4.8976	-0.316782	1.68601	0.064948	0.79884
AL139286.3	0
AL139286.2	0
AGO3	42.2296	-1.00791	0.940358	1.18675	0.275986	0.717173
AL138787.2	1.05492	1.22933	2.91572	0.20408	0.651447
TEKT2	0
ADPRHL2	20.0985	1.90893	1.20961	2.35617	0.124788	0.651212
COL8A2	0.0591186	1.73999	4.44889	-0.172035	1
TRAPPC3	30.7407	1.42011	1.18617	1.3654	0.242604	0.712918
MAP7D1	62.5822	-0.908898	0.883741	1.07871	0.298986	0.727608
THRAP3	100.41	0.610016	0.847542	0.500668	0.479207	0.817016
SH3D21	2.12121	1.14222	2.32327	0.25239	0.615397
EVA1B	34.1609	2.3229	1.20232	3.32777	0.068119	0.64455
AL591845.1	0.878717	2.68008	3.81137	0.761661	0.382809
STK40	29.2853	-0.848966	0.977659	0.784355	0.375812	0.769413
LSM10	44.391	0.469615	0.926139	0.252675	0.615198	0.873964
OSCP1	0.0230464	0.538212	4.43547	-0.465678	1
MRPS15	55.4931	2.88265	1.15665	5.21419	0.0224033	0.498546
CSF3R	0
AL596257.1	0
AC117945.2	0
AC117945.1	0
GRIK3	0
AL031430.1	0
AL353604.1	0
LINC01137	4.19478	1.51654	1.72578	0.778882	0.377483
ZC3H12A	66.7763	3.60104	1.10029	8.54801	0.003459	0.2303
MEAF6	51.9511	0.615116	0.903518	0.446206	0.504142	0.826911
SNIP1	19.5679	1.84783	1.21155	2.20348	0.1377	0.655566
DNALI1	0
GNL2	19.5538	1.93608	1.2481	2.26107	0.132662	0.651212
AL513220.1	0
RSPO1	0
C1orf109	3.83891	1.04839	1.87934	0.326423	0.567773
CDCA8	9.37485	0.477183	1.42236	0.115711	0.733734
EPHA10	0
MANEAL	1.41364	0.281561	2.62101	0.0264891	0.870711
AL929472.3	0.0230464	0.538212	4.43547	-0.465678	1
YRDC	9.71236	1.43101	1.36378	1.09619	0.295103
C1orf122	33.7979	1.48488	1.18202	1.49117	0.222034	0.696646
MTF1	11.7664	0.868796	1.32625	0.433905	0.510079	0.829189
AL929472.2	0
INPP5B	4.72109	0.111659	1.78422	0.0449895	0.832023
SF3A3	27.5051	1.37868	1.19807	1.26794	0.260154	0.714397
FHL3	2.35533	4.29388	2.28309	3.02377	0.0820525
UTP11	12.3891	1.50337	1.30272	1.30587	0.253145	0.714397
POU3F1	1.30262	-0.926445	2.91669	0.197321	0.656892
MIR3659HG	0.0460929	0.14051	4.42785	-0.298021	1
LINC02786	0
AL390839.1	0
AL390839.2	0
LINC01343	0
LINC01685	0
AL354702.2	0.0230464	0.538212	4.43547	-0.465678	1
RRAGC	12.1686	0.922293	1.34304	0.474709	0.490829	0.822161
AL139260.1	3.77554	0.161039	1.93058	0.029241	0.864224
MYCBP	17.4351	1.09428	1.24808	0.760296	0.383236	0.773897
GJA9	0.0460929	0.14051	4.42785	-0.298021	1
RHBDL2	0.187377	0.635783	4.41302	-0.0904682	1
AKIRIN1	64.8272	1.60276	0.91033	2.78834	0.0949525	0.647566
NDUFS5	191.315	1.48989	0.816424	3.01781	0.0823546	0.647566
MACF1	152.007	-0.556219	0.834743	0.45403	0.500427	0.824714
AL356055.1	0
AL442071.2	0.0460929	0.14051	4.42785	-0.298021	1
AL442071.1	0.210423	0.418168	4.4102	-0.0867191	1
BMP8A	5.32809	4.15703	1.84247	4.25007	0.0392487
PABPC4	46.8488	3.19455	1.13179	6.65832	0.00986938	0.384271
PABPC4-AS1	0.673351	2.57407	3.75439	0.566445	0.451675
HEYL	0
AL035404.2	0
NT5C1A	0
HPCAL4	0.128258	0.332397	4.41654	-0.150317	1
PPIE	21.3929	1.53413	1.22408	1.50417	0.22003	0.696646
BMP8B	0.200402	1.54037	4.42274	0.0421664	0.837303
OXCT2	11.6603	6.65585	1.56136	13.5406	0.000233463	0.0444113
BMP8B-AS1	0
AL033527.3	0
AL033527.4	0.0591186	1.73999	4.44889	-0.172035	1
LINC02811	0
TRIT1	2.5591	0.212374	2.15626	0.0180845	0.893024
MYCL	0
AL033527.2	0.0230464	0.538212	4.43547	-0.465678	1
MFSD2A	0.187377	0.635783	4.41302	-0.0904682	1
CAP1	235.575	-0.457635	0.824954	0.312383	0.576222	0.858699
PPT1	32.1233	-0.142636	1.00066	0.0207752	0.885393	0.965509
RLF	39.528	1.15615	1.25218	0.821491	0.364745	0.76323
TMCO2	0.210423	0.418168	4.4102	-0.0867191	1
AL050341.2	1.35568	0.416347	2.73238	0.0581337	0.80947
ZMPSTE24	30.8392	0.22631	1.00393	0.0547288	0.81503	0.940981
COL9A2	4.97378	4.85937	1.87968	5.21619	0.0223775
SMAP2	84.6735	0.558912	0.852694	0.419016	0.517429	0.83133
AL031985.4	0.197397	-0.216001	4.41016	-0.0677343	1
ZFP69B	1.49861	1.36122	2.6068	0.304371	0.581155
AL031985.3	0.151304	0.114782	4.41373	-0.122267	1
ZFP69	0.638285	-0.838831	3.80137	0.134723	0.713585
AL603839.3	1.45673	-0.282712	2.59007	0.0404824	0.84054
EXO5	1.91645	0.556027	2.36258	0.0631599	0.80157
AL603839.1	0
AL603839.2	0
ZNF684	3.57774	0.682692	1.80267	0.149709	0.698814
AL356379.2	0
RIMS3	0.292588	0.466455	4.40596	-0.051725	1
AL031289.2	0
AL031289.1	0.207418	-1.04341	4.41417	0.0993654	0.752592
NFYC-AS1	0.529063	1.05819	4.0977	0.0713678	0.789356
NFYC	33.6046	0.0423919	0.972062	0.00221511	0.962461	0.979527
KCNQ4	1.22907	1.63595	2.86682	0.362535	0.547102
CITED4	0.775356	2.61443	3.28206	0.681375	0.409114
AC119677.1	0
AL391730.2	0
CTPS1	15.8722	1.48163	1.30654	1.26994	0.259777	0.714397
SLFNL1-AS1	2.16294	0.596656	2.2506	0.0844196	0.771395
SLFNL1	0.0230464	0.538212	4.43547	-0.465678	1
SCMH1	8.41928	-0.278122	1.48011	0.0626562	0.802346
AC093151.8	0
AC093151.3	0
FOXO6	0.0230464	0.538212	4.43547	-0.465678	1
AC093151.2	0
EDN2	0
HIVEP3	38.9355	-1.65873	0.976958	3.01607	0.0824431	0.647566
AL445933.2	0
AC119676.1	0
AL158216.1	0
GUCA2B	0
GUCA2A	0
FOXJ3	32.0082	-0.976889	1.00254	1.00346	0.316474	0.740222
AC096540.1	0
RIMKLA	0.0460929	0.14051	4.42785	-0.298021	1
ZMYND12	0.0591186	1.73999	4.44889	-0.172035	1
PPCS	31.2486	2.26331	1.16979	3.38036	0.0659777	0.64455
CCDC30	3.09482	-0.755362	2.01708	0.180483	0.670958
PPIH	15.3808	0.854601	1.35407	0.410996	0.521464	0.833679
AC098484.4	0.325655	-0.268286	4.4036	-0.0226453	1
AC098484.2	0.0460929	0.14051	4.42785	-0.298021	1
YBX1	188.485	2.2744	1.21308	2.97862	0.0843713	0.647566
CLDN19	0
P3H1	8.62073	0.87861	1.43883	0.378027	0.538661
C1orf50	11.6262	1.54869	1.31791	1.3593	0.243659	0.713655
AC098484.1	0
TMEM269	0.197397	-0.216001	4.41016	-0.0677343	1
SVBP	16.3136	1.53023	1.29045	1.35755	0.243963	0.713666
ERMAP	0.746501	-0.1843	3.59023	0.033313	0.855176
AL512353.1	0.798402	2.18807	3.23568	0.503705	0.477877
ZNF691	1.21324	0.0615023	2.7772	0.00883124	0.925129
SLC2A1	28.5152	-0.25291	0.979687	0.0676526	0.794786	0.936126
SLC2A1-AS1	1.00698	1.412	3.07445	0.416631	0.518623
AC099795.1	0
FAM183A	0
EBNA1BP2	21.6102	1.97687	1.21045	2.49233	0.114402	0.651212
CFAP57	0.0460929	0.14051	4.42785	-0.298021	1
TMEM125	0
C1orf210	0
TIE1	0
MPL	0
AL139289.3	0
AL139289.2	0.292588	0.466455	4.40596	-0.051725	1
CDC20	17.8611	1.39647	1.3716	0.999764	0.317368	0.740222
ELOVL1	56.348	0.455148	0.909088	0.24467	0.620853	0.87819
MED8	19.9225	1.95575	1.22918	2.37514	0.123281	0.651212
AL139289.1	0.0230464	0.538212	4.43547	-0.465678	1
SZT2	11.1281	-0.734105	1.19762	0.397741	0.528258	0.835615
SZT2-AS1	0
HYI	3.41151	4.53861	2.07541	3.97713	0.046122
HYI-AS1	0.184372	-0.937727	4.415	0.0632387	0.801448
PTPRF	0.23347	0.239418	4.40818	-0.0776828	1
KDM4A	15.6404	-0.457051	1.09215	0.179236	0.672031	0.895593
KDM4A-AS1	1.48674	2.08278	2.78429	0.681314	0.409135
ST3GAL3	10.1478	-0.797776	1.45542	0.349912	0.554163
AL451062.1	0.0691393	-0.139337	4.42357	-0.200197	1
ARTN	0.0230464	0.538212	4.43547	-0.465678	1
AL357079.1	2.05167	3.80295	2.34147	2.41092	0.120492
IPO13	5.35963	0.291486	1.76098	0.0284325	0.866096
AL357079.2	0.0591186	1.73999	4.44889	-0.172035	1
DPH2	3.87749	1.44194	1.79199	0.654823	0.418393
ATP6V0B	97.7661	1.94508	1.18814	2.36807	0.12384	0.651212
B4GALT2	2.03584	1.15699	2.24333	0.283626	0.594335
CCDC24	1.09801	0.402302	2.88442	0.0163438	0.898273
SLC6A9	0.0821651	1.00995	4.42846	-0.197101	1
AL139220.2	0.0921858	-0.356952	4.42076	-0.128313	1
KLF17	0
KLF18	0
DMAP1	22.2415	1.75652	1.24749	1.86629	0.1719	0.674228
ERI3	17.5089	1.54181	1.23234	1.51439	0.218471	0.696119
ERI3-IT1	0
RNF220	33.3162	-0.222661	0.94998	0.0550486	0.8145	0.940681
TMEM53	2.85634	0.744066	2.04536	0.164372	0.685162
ARMH1	1.49179	1.64071	2.58932	0.474307	0.491012
KIF2C	4.72942	-1.16714	1.86069	0.402465	0.525819
AL592166.1	1.41945	2.30202	2.65095	0.818031	0.365756
RPS8	1444.05	1.67541	0.809895	3.79078	0.0515356	0.605467
BEST4	0.374753	0.497021	4.40285	-0.0295455	1
PLK3	29.3418	2.22902	1.17501	3.28143	0.0700679	0.64455
TCTEX1D4	0.0230464	0.538212	4.43547	-0.465678	1
BTBD19	1.37075	0.411659	2.8742	0.0652362	0.798404
PTCH2	0.473955	-1.23507	4.26064	0.203398	0.651992
EIF2B3	23.4768	-0.074376	1.05776	0.0140932	0.905501	0.970396
HECTD3	7.26827	-0.410333	1.55354	0.0736759	0.786058
UROD	13.0635	1.54889	1.35907	1.26211	0.261252	0.714397
ZSWIM5	1.06309	0.331173	3.27779	0.0727646	0.787353
LINC01144	0
HPDL	0
MUTYH	5.55065	1.12937	1.5792	0.523122	0.469513
TOE1	4.69914	1.31677	1.68779	0.619527	0.431223
TESK2	2.18535	-1.2999	2.32164	0.245515	0.620251
CCDC163	0.420846	0.247028	4.40064	-0.0298159	1
MMACHC	0.993949	0.764088	3.35575	0.175112	0.675608
PRDX1	214.936	0.586648	0.977407	0.347781	0.555372	0.849365
AKR1A1	38.1797	1.79014	1.17895	2.12339	0.145065	0.661495
NASP	73.3461	1.29652	1.20662	1.08031	0.298629	0.727608
CCDC17	1.73023	1.07073	2.45986	0.242928	0.6221
GPBP1L1	34.9854	-0.646737	0.960431	0.474527	0.490912	0.822161
TMEM69	4.46062	1.59065	1.75671	0.833985	0.361123
IPP	5.43458	0.678048	1.63759	0.178434	0.672723
AL604028.1	0.0230464	0.538212	4.43547	-0.465678	1
MAST2	10.195	-0.389275	1.42556	0.0858693	0.769496
PIK3R3	16.2489	0.945992	1.11778	0.696498	0.403963	0.78377
AL358075.1	0.0460929	0.14051	4.42785	-0.298021	1
AL358075.2	0.0591186	1.73999	4.44889	-0.172035	1
TSPAN1	0
P3R3URF	0
POMGNT1	8.2893	1.61859	1.43324	1.25706	0.262208
LURAP1	0
RAD54L	1.93785	0.0439013	2.37516	0.000974692	0.975094
LRRC41	17.3424	2.10636	1.23474	2.74408	0.0976154	0.647566
UQCRH	150.625	2.27542	1.19494	3.08506	0.0790142	0.646393
NSUN4	4.51587	0.824729	1.85907	0.258956	0.610838
FAAH	0.279562	-0.0450927	4.40542	-0.0521652	1
LINC01398	0
DMBX1	0
TMEM275	0
MKNK1-AS1	0.0691393	-0.139337	4.42357	-0.200197	1
KNCN	0
MKNK1	23.0037	-0.910208	1.01855	0.800474	0.370952	0.766887
MOB3C	3.33309	0.676263	1.94884	0.13868	0.709597
ATPAF1	13.9875	1.09313	1.28311	0.725884	0.394221	0.779543
TEX38	0
EFCAB14-AS1	0.187377	0.635783	4.41302	-0.0904682	1
EFCAB14	44.5218	0.21446	0.902839	0.055984	0.81296	0.9405
CYP4B1	0.0230464	0.538212	4.43547	-0.465678	1
CYP4A11	0
CYP4X1	0
CYP4Z1	0
CYP4A22-AS1	0
CYP4A22	0
LINC00853	0.515835	2.67087	4.44003	0.421863	0.516009
PDZK1IP1	0
TAL1	0
AL135960.1	0
STIL	3.96793	-0.895948	1.91191	0.264412	0.607105
CMPK1	51.9575	0.244398	0.885501	0.0754579	0.78355	0.932584
LINC01389	0.253511	-1.22759	4.41287	0.16379	0.685691
FOXE3	0
FOXD2-AS1	1.514	-0.760419	2.66812	0.0309942	0.860253
FOXD2	0.361727	0.0644286	4.4022	-0.0380478	1
LINC01738	0
TRABD2B	0
AL691459.1	0
AC096541.1	0
LINC02794	0
AL356289.1	0
AL109659.1	0
SLC5A9	0
AL109659.2	0
SPATA6	0
AGBL4	0.0230464	0.538212	4.43547	-0.465678	1
AL391844.1	0
BEND5	0
AL645507.1	0
AC099788.1	0
AL590432.1	0
AGBL4-IT1	0
ELAVL4	0
AL592182.2	0
AL592182.1	0
LINC02808	0
AL592182.3	0
DMRTA2	0.0460929	0.14051	4.42785	-0.298021	1
AL049637.2	0
FAF1	77.083	-0.556989	0.887685	0.404509	0.52477	0.835203
AL049637.1	0.174351	-0.0639681	4.4117	-0.0945815	1
CDKN2C	4.66809	0.101481	1.69412	0.00402685	0.949402
C1orf185	0
LINC01562	0.0460929	0.14051	4.42785	-0.298021	1
RNF11	22.0514	1.27858	1.23491	1.03909	0.308034	0.735079
AL162430.2	0
TTC39A	0.230464	-1.13948	4.41347	0.132727	0.715621
TTC39A-AS1	0
EPS15	56.6706	-1.41049	0.960889	2.24434	0.134104	0.652489
AC104170.2	0.0460929	0.14051	4.42785	-0.298021	1
AC104170.1	0.756522	-0.504638	3.56569	0.0771321	0.781222
OSBPL9	28.0486	-0.617125	1.01734	0.377779	0.538794	0.840523
NRDC	74.5007	0.251818	0.857061	0.0855373	0.769929	0.930464
AL050343.2	0.138279	-0.687734	4.4172	-0.020223	1
AL050343.3	0.0460929	0.14051	4.42785	-0.298021	1
RAB3B	0.0230464	0.538212	4.43547	-0.465678	1
TXNDC12	27.9098	1.771	1.17486	2.13322	0.144137	0.661495
KTI12	1.60803	-0.362917	2.49913	0.0563184	0.812412
AL445685.1	0.105212	0.612244	4.42082	-0.177211	1
TXNDC12-AS1	0
BTF3L4	22.4755	0.0219339	1.0703	0.00147582	0.969356	0.982489
ZFYVE9	0.0460929	0.14051	4.42785	-0.298021	1
CC2D1B	6.60704	-0.156103	1.59737	0.0432143	0.835322
AL513218.1	0
AL513218.2	0.0821651	1.00995	4.42846	-0.197101	1
ORC1	2.37853	-0.0877333	2.13467	0.00250256	0.960102
PRPF38A	27.3645	1.64948	1.198	1.79126	0.180773	0.675531
TUT4	48.9829	-0.1513	0.912947	0.0288302	0.865172	0.958614
AL591167.1	0
GPX7	3.05573	2.01909	2.0634	0.983006	0.321458
SHISAL2A	12.5108	-0.434401	1.14049	0.145814	0.702568	0.906428
COA7	3.0146	2.17556	1.94968	1.22417	0.268545
ZYG11B	0.934884	-2.28872	3.26541	0.826398	0.363316
ZYG11A	0.0460929	0.14051	4.42785	-0.298021	1
AC099677.4	0
ECHDC2	11.5204	1.34205	1.3258	1.01587	0.313501	0.738342
SCP2	55.1261	1.06383	0.897107	1.32061	0.250483	0.714397
PODN	0.0460929	0.14051	4.42785	-0.298021	1
AL445183.1	0
SLC1A7	0.0460929	0.14051	4.42785	-0.298021	1
AL445183.2	0
CPT2	3.56772	0.824046	1.80385	0.216915	0.641401
AL606760.2	0.0921858	-0.356952	4.42076	-0.128313	1
CZIB	17.828	1.38042	1.24812	1.1892	0.275491	0.717173
AL606760.3	0.0460929	0.14051	4.42785	-0.298021	1
MAGOH	60.7236	2.062	1.17832	2.7239	0.0988565	0.647566
AL606760.1	0.0460929	0.14051	4.42785	-0.298021	1
LRP8	11.1048	0.585745	1.47683	0.162343	0.687008	0.899736
AL355483.3	0
AL355483.1	0.115232	-0.535701	4.41874	-0.0700254	1
AL355483.2	0
LINC01771	0.970903	0.955212	3.38445	0.229856	0.631631
AC119428.2	0
AC119428.1	0
LINC02812	0
DMRTB1	0
GLIS1	0
NDC1	6.63464	-0.0498095	1.53078	0.0025764	0.959518
YIPF1	8.7407	1.24588	1.46658	0.721137	0.395771
DIO1	0.0230464	0.538212	4.43547	-0.465678	1
HSPB11	59.1106	0.1096	0.89227	0.0152029	0.901869	0.969808
LRRC42	5.56428	0.983088	1.61011	0.381141	0.536993
LDLRAD1	0
TMEM59	141.615	0.841036	0.827271	0.983511	0.321334	0.742551
TCEANC2	5.95879	0.660545	1.7391	0.151554	0.697055
CDCP2	0
AL357673.2	0
CYB5RL	1.15011	1.52421	2.8288	0.343136	0.558025
MRPL37	17.9589	1.20581	1.24543	0.918941	0.337753	0.749843
SSBP3	55.3801	-2.0738	0.946161	4.90473	0.0267833	0.525222
SSBP3-AS1	0
AL161644.1	0
AL035415.1	0
AC099796.2	0
LINC02784	0
ACOT11	0.305614	1.04542	4.40924	0.0081323	0.928145
FAM151A	0
AL590093.1	0
MROH7	0.0230464	0.538212	4.43547	-0.465678	1
TTC4	7.19857	0.595706	1.47498	0.168592	0.681366
PARS2	0.900609	0.810722	3.0964	0.0607489	0.805316
TTC22	5.49449	-1.95022	1.5508	1.51954	0.21769
AC096536.1	0.0460929	0.14051	4.42785	-0.298021	1
LEXM	1.32667	-2.8258	2.88545	1.38353	0.2395
DHCR24	7.98737	-0.498409	1.48237	0.12558	0.72306
AC096536.3	0.381769	-0.983641	4.40442	0.113478	0.736219
AC096536.2	0
DHCR24-DT	0.0460929	0.14051	4.42785	-0.298021	1
AL590440.2	0
TMEM61	0
AL590440.1	0
BSND	0
PCSK9	0
USP24	44.7076	-1.4679	0.955896	2.4561	0.117069	0.651212
MIR4422HG	0.151304	0.114782	4.41373	-0.122267	1
AL603840.1	0
LINC01755	0
LINC01753	0
AL353681.1	0
AC119674.1	0
LINC01767	0
PLPP3	0.16433	0.91563	4.41731	-0.0837869	1
PRKAA2	0
FYB2	0
AL360295.1	0
C8A	0
C8B	0
AL161740.1	0
DAB1	0.450908	-1.17449	4.34612	0.175224	0.67551
AL390243.1	0
DAB1-AS1	0
AL445193.2	0
OMA1	3.41927	0.111108	1.94137	0.0167677	0.89697
AL035411.3	0
TACSTD2	0.0230464	0.538212	4.43547	-0.465678	1
MYSM1	20.4007	-0.368677	1.12319	0.108149	0.742261	0.921818
AL136985.3	0.0460929	0.14051	4.42785	-0.298021	1
JUN	354.767	0.803711	0.807621	0.944376	0.331155	0.746986
LINC01135	1.86175	-0.954834	2.57878	0.228773	0.632435
AL136985.2	0
AL136985.1	0.0230464	0.538212	4.43547	-0.465678	1
LINC02777	0.282567	1.32527	4.41353	0.0448906	0.832205
LINC01358	2.81235	2.39951	2.05328	1.36824	0.242115
AL592431.2	0
AL592431.1	0.0230464	0.538212	4.43547	-0.465678	1
AC093425.1	0.105212	0.612244	4.42082	-0.177211	1
AC093424.1	0
FGGY	27.5252	-0.362348	0.99018	0.13601	0.71228	0.909914
AL035416.1	0
HOOK1	0
CYP2J2	0.446898	1.11402	4.37974	0.0529581	0.817994
C1orf87	0
LINC02778	0
LINC01748	0
AC099792.1	0.0230464	0.538212	4.43547	-0.465678	1
NFIA	0.187377	0.635783	4.41302	-0.0904682	1
NFIA-AS2	0
NFIA-AS1	0
AC099791.3	0
AC099791.4	0
TM2D1	18.9304	0.559652	1.26263	0.199204	0.655364	0.888659
AC099791.2	0.105212	0.612244	4.42082	-0.177211	1
PATJ	2.12227	-1.67823	2.49063	0.621594	0.430456
L1TD1	0
KANK4	0.0591186	1.73999	4.44889	-0.172035	1
USP1	41.1663	-0.533659	0.924462	0.337314	0.561383	0.852251
DOCK7	4.46622	4.48958	1.90198	4.52747	0.0333548
ANGPTL3	0.0230464	0.538212	4.43547	-0.465678	1
AC103923.1	0
ATG4C	3.05575	-1.09745	2.05478	0.331075	0.565027
AC099794.1	0
LINC01739	0
AL162400.3	0
AL162400.1	0
AL162400.2	0
AC096543.1	0
LINC00466	0.0230464	0.538212	4.43547	-0.465678	1
AC096543.2	0
FOXD3-AS1	0
FOXD3	0
ALG6	9.78912	1.10361	1.38449	0.63623	0.425079
ITGB3BP	14.2079	1.0745	1.29746	0.680588	0.409384	0.789692
BX004807.1	0.151304	0.114782	4.41373	-0.122267	1
EFCAB7	3.68997	0.305243	1.79074	0.0318149	0.858435
DLEU2L	0.253511	-1.22759	4.41287	0.16379	0.685691
PGM1	16.9164	1.42232	1.2625	1.24238	0.265013	0.714651
ROR1	0.0591186	1.73999	4.44889	-0.172035	1
ROR1-AS1	0
AL445205.1	0
UBE2U	0.0230464	0.538212	4.43547	-0.465678	1
CACHD1	0
RAVER2	0.325655	-0.268286	4.4036	-0.0226453	1
JAK1	186.08	0.271231	0.822428	0.107664	0.74282	0.921818
LINC01359	0
AL357078.2	0
AK4	6.81585	2.60216	1.65236	2.34868	0.125389
DNAJC6	2.486	-0.415844	2.34844	0.089901	0.764303
AL139294.1	0.220444	-0.348479	4.40895	-0.0418691	1
LEPROT	14.3148	1.57537	1.36939	1.27828	0.258218	0.714397
LEPR	2.4088	-0.879406	2.2189	0.154321	0.69444
AC119800.1	0.0230464	0.538212	4.43547	-0.465678	1
AL513493.1	0
PDE4B	149.043	0.609689	0.843066	0.508048	0.475985	0.81657
AL590783.1	0.115232	-0.535701	4.41874	-0.0700254	1
SGIP1	0
AL139147.1	0
TCTEX1D1	0
INSL5	0
WDR78	1.21023	-0.51024	2.78966	0.0644383	0.799614
AL592161.1	0
MIER1	85.3944	0.174027	0.854477	0.0412903	0.838979	0.94934
SLC35D1	14.7792	1.15055	1.27837	0.80174	0.370574	0.766887
C1orf141	0.128258	0.332397	4.41654	-0.150317	1
AL133320.2	0.0591186	1.73999	4.44889	-0.172035	1
IL23R	0.0591186	1.73999	4.44889	-0.172035	1
IL12RB2	40.5483	1.58458	1.28937	1.39617	0.237367	0.710287
SERBP1	187.935	1.12797	0.827443	1.72949	0.188476	0.683186
LINC01702	0
GADD45A	28.9717	2.86755	1.14424	5.52116	0.0187878	0.478061
GNG12	5.12149	6.0868	2.14017	5.97877	0.0144791
GNG12-AS1	1.11519	3.51508	3.15576	1.36648	0.242417
DIRAS3	0.0230464	0.538212	4.43547	-0.465678	1
WLS	0.538881	1.93405	4.15084	0.264203	0.607247
RPE65	0.0230464	0.538212	4.43547	-0.465678	1
DEPDC1	4.09108	0.000783724	2.02009	0.0113446	0.915177
AL138789.1	0
DEPDC1-AS1	0
AL035412.1	0
AL033530.1	0.0230464	0.538212	4.43547	-0.465678	1
AL691520.1	0
LINC01707	0
LINC02791	0
LINC01758	0
AL359894.1	0
LRRC7	0.141284	1.31333	4.42495	-0.0529918	1
AL117353.1	0
AL158840.1	0
LRRC40	6.33649	0.199114	1.60864	0.048047	0.826497
SRSF11	147.123	0.559515	0.83236	0.439545	0.507342	0.828838
AL353771.1	0.0230464	0.538212	4.43547	-0.465678	1
ANKRD13C	25.1881	0.787368	1.29447	0.372012	0.54191	0.84201
HHLA3	4.28812	1.70507	1.72382	0.977246	0.32288
AL158839.1	0
CTH	2.70218	2.55032	2.03632	1.52428	0.216973
AL354872.2	0.0230464	0.538212	4.43547	-0.465678	1
LINC01788	0
AL513285.1	0
PTGER3	0.16433	0.91563	4.41731	-0.0837869	1
AL031429.1	0
AL031429.2	0
ZRANB2-AS1	0.0230464	0.538212	4.43547	-0.465678	1
ZRANB2	58.7456	0.623381	0.879034	0.487476	0.485056	0.817757
ZRANB2-AS2	0.979769	0.141678	3.01978	-0.00273922	1
NEGR1	0
AL354949.1	0
NEGR1-IT1	0
AL513166.1	0
AL583808.1	0
LINC02796	0
LINC02797	0
LINC01360	0
LINC02238	0
AL591463.1	0
LRRIQ3	0.47696	-0.385459	4.26168	0.0158383	0.89985
FPGT	3.59357	1.3833	1.82892	0.577999	0.447098
TNNI3K	0
AC093158.1	0
AC105271.1	0
LRRC53	0.0460929	0.14051	4.42785	-0.298021	1
ERICH3	0.947856	1.1872	3.41513	0.302723	0.58218
ERICH3-AS1	0
AC135803.1	0.0230464	0.538212	4.43547	-0.465678	1
CRYZ	5.16859	0.0036362	1.73311	0.0177457	0.894025
TYW3	17.1303	0.967285	1.25944	0.585502	0.444164	0.800553
AC133865.1	0
AC099786.3	0
AC099786.1	0
LHX8	0
AC099786.2	0
SLC44A5	0.0591186	1.73999	4.44889	-0.172035	1
ACADM	21.3609	1.20836	1.22676	0.949536	0.329838	0.746811
RABGGTB	23.7706	0.29072	1.0239	0.0792033	0.77838	0.930991
MSH4	0.266537	-0.571673	4.40713	0.00688208	0.933885
ASB17	0
AC092813.1	0
AC092813.2	0
ST6GALNAC3	0.737486	-2.492	3.88085	0.735666	0.391053
AC104458.1	0
LINC02567	0
ST6GALNAC5	0.0591186	1.73999	4.44889	-0.172035	1
AL035409.1	0.0230464	0.538212	4.43547	-0.465678	1
PIGK	8.05429	0.216065	1.44772	0.0265914	0.870464
AC093433.2	0
AK5	0.901764	1.90783	3.4904	0.562195	0.453377
AC095030.1	0
AC093575.1	0
AC118549.1	18.9325	0.0331853	1.30237	0.00834575	0.92721	0.972314
USP33	31.7238	-0.329115	0.96185	0.122899	0.725912	0.916465
MIGA1	14.8276	-1.17893	1.23785	0.994967	0.318531	0.740222
NEXN-AS1	0
NEXN	0.809631	-1.63453	3.45845	0.432758	0.510639
FUBP1	48.9534	0.0752436	0.899673	0.00704693	0.933099	0.972314
DNAJB4	8.7593	2.75947	1.58572	2.79793	0.0943862
GIPC2	0.539083	0.534722	4.06475	0.00608983	0.937798
AC103591.3	0.466939	0.0443816	4.2986	-0.0198064	1
AC103591.4	0
AC096531.2	0
PTGFR	0
IFI44L	62.7612	1.81839	1.17197	2.17567	0.140208	0.656826
IFI44	49.9958	1.12478	0.961556	1.29548	0.25504	0.714397
ADGRL4	0.0591186	1.73999	4.44889	-0.172035	1
AL353651.2	0
AL353651.1	0
LINC02792	0
AC099671.1	0
AC098657.2	0
AL606519.1	0
AL136234.1	0
LINC01781	0
AC093154.1	0
ADGRL2	0
AL138799.2	0
AL138799.4	0
AC117944.1	0.0460929	0.14051	4.42785	-0.298021	1
AL157944.1	0
LINC01362	0.0821651	1.00995	4.42846	-0.197101	1
LINC01361	0
AC116099.1	0
LINC01712	0
LINC01725	0
AL035706.1	0
TTLL7	1.06494	0.823577	2.90888	0.0853347	0.770194
TTLL7-IT1	0
AC104454.2	0
AL359504.2	0.105212	0.612244	4.42082	-0.177211	1
PRKACB	34.5411	-0.0378164	0.94822	0.00160698	0.968024	0.981871
SAMD13	0
DNASE2B	0
AL844170.1	0
RPF1	13.2912	0.627775	1.31166	0.236635	0.626647	0.880239
GNG5	160.753	2.06146	1.2283	2.43816	0.118415	0.651212
SPATA1	0.746501	-0.1843	3.59023	0.033313	0.855176
CTBS	9.12783	2.21507	1.40288	2.38991	0.122121
AL359762.1	0.0821651	1.00995	4.42846	-0.197101	1
AL359762.2	0
LINC01555	0.0230464	0.538212	4.43547	-0.465678	1
SSX2IP	3.32223	-0.0880555	1.90452	0.00218821	0.96269
AC104169.1	0
LPAR3	0.867541	1.46547	3.1322	0.241438	0.623169
MCOLN2	36.968	0.628779	0.951719	0.428302	0.512823	0.829566
WDR63	1.02907	0.120402	3.19346	0.0368412	0.847789
MCOLN3	0.23347	0.239418	4.40818	-0.0776828	1
SYDE2	0.200402	1.54037	4.42274	0.0421664	0.837303
C1orf52	17.0742	1.3181	1.34503	0.954053	0.32869	0.746811
BCL10	10.7892	1.30381	1.35225	0.93346	0.333966	0.748213
AL078459.1	0.315635	0.314424	4.40441	-0.0499232	1
DDAH1	0
AL360219.1	0
AC092807.3	0
AC092807.2	0
CCN1	5.48651	6.26799	2.07729	6.67055	0.00980189
AC092807.1	0
ZNHIT6	8.59017	0.243631	1.43438	0.0319294	0.858183
COL24A1	0.0460929	0.14051	4.42785	-0.298021	1
LINC02795	0.266537	-0.571673	4.40713	0.00688208	0.933885
ODF2L	40.5548	0.709595	0.931372	0.56542	0.452085	0.805669
CLCA2	0
CLCA1	0
CLCA4	0
CLCA4-AS1	0.24349	-0.465994	4.40796	-0.0170063	1
AL049597.2	0.187377	0.635783	4.41302	-0.0904682	1
SH3GLB1	76.5867	0.285155	0.871285	0.105642	0.745161	0.921898
AL355981.1	0
SELENOF	74.9343	0.885329	0.862006	1.0048	0.316151	0.740222
HS2ST1	18.2268	-0.546732	1.05457	0.275417	0.599721	0.868048
AL121989.1	0
LINC01140	0.0230464	0.538212	4.43547	-0.465678	1
LINC02801	0
LMO4	41.2012	-0.281616	0.935856	0.0910601	0.762834	0.928382
LINC01364	0.515835	2.67087	4.44003	0.421863	0.516009
PKN2-AS1	0.585176	0.331177	3.93714	0.0018488	0.965703
AL445438.1	0
PKN2	42.6414	-0.676222	0.934074	0.536454	0.463906	0.810022
GTF2B	46.4736	2.47816	1.126	4.24492	0.0393679	0.561499
KYAT3	13.49	-1.16706	1.15795	1.04975	0.305565	0.732808
RBMXL1	4.33305	1.2713	1.70249	0.568817	0.45073
GBP3	12.5261	-1.2265	1.16141	1.15976	0.281515	0.717173
GBP1	22.9039	1.51201	1.24863	1.39725	0.237185	0.710287
GBP2	61.6895	-0.223921	0.90016	0.0624324	0.802692	0.937046
AC104459.1	0.115232	-0.535701	4.41874	-0.0700254	1
GBP7	0.0821651	1.00995	4.42846	-0.197101	1
GBP4	29.3019	0.275618	0.991721	0.0806205	0.776458	0.930464
AC099063.4	1.67717	-0.482548	2.46357	0.0800022	0.777294
GBP5	87.2872	0.0928591	0.900252	0.0115423	0.914444	0.971779
AC099063.1	0.197397	-0.216001	4.41016	-0.0677343	1
GBP6	0.0230464	0.538212	4.43547	-0.465678	1
AL596214.1	0.161325	-0.820212	4.41599	0.0236954	0.877663
LRRC8B	4.28917	-0.255398	1.72479	0.0308149	0.860654
LRRC8C-DT	3.28931	1.42328	1.91097	0.572819	0.449141
AC093423.2	0.772553	0.308363	3.54663	0.0250996	0.874119
LRRC8C	31.0179	-1.51904	0.977073	2.50059	0.113804	0.651212
AC099568.1	0.0230464	0.538212	4.43547	-0.465678	1
AC099568.2	0
LRRC8D	10.2719	-1.01508	1.23302	0.71638	0.397334
AL391497.1	0
ZNF326	21.126	0.379947	1.06565	0.126192	0.722414	0.914689
AL161797.1	0
AC098656.1	0
AL627316.1	0
LINC02787	0
BARHL2	0
AC092805.1	0
LINC02609	0
LINC02788	0
LINC01763	0.0230464	0.538212	4.43547	-0.465678	1
AC091614.1	0.0230464	0.538212	4.43547	-0.465678	1
ZNF644	75.1065	0.343046	0.893858	0.146817	0.701595	0.906428
HFM1	0.473955	-1.23507	4.26064	0.203398	0.651992
CDC7	6.96035	-0.649313	1.53893	0.209108	0.647468
TGFBR3	118.561	-1.54206	0.975586	2.59121	0.107458	0.651212
BRDT	0.259521	1.72297	4.42118	0.113923	0.735721
EPHX4	0
SETSIP	0.105212	0.612244	4.42082	-0.177211	1
BTBD8	0.23347	0.239418	4.40818	-0.0776828	1
AC104836.1	0
C1orf146	0.0460929	0.14051	4.42785	-0.298021	1
GLMN	27.9808	0.274576	0.962399	0.0806675	0.776395	0.930464
RPAP2	32.8697	0.0891866	0.968585	0.0102475	0.919368	0.972314
GFI1	23.7916	-0.162604	1.02561	0.0277917	0.867599	0.959692
EVI5	1.58378	2.07996	2.53854	0.725599	0.394313
RPL5	502.383	1.45092	0.812246	2.88732	0.0892793	0.647566
DIPK1A	18.2155	0.133008	1.29593	0.0147956	0.903186	0.969808
AC093577.1	0.0230464	0.538212	4.43547	-0.465678	1
MTF2	28.4949	0.0610986	0.987318	0.00384778	0.950539	0.973633
TMED5	32.6655	0.422986	0.986534	0.186281	0.66603	0.894557
CCDC18	12.6216	-0.349008	1.37189	0.0778014	0.780299	0.931429
CCDC18-AS1	41.6469	0.0217651	0.924161	0.000574116	0.980884	0.986962
DR1	48.8629	0.115227	0.915407	0.0157109	0.900252	0.969808
FNBP1L	0.0821651	1.00995	4.42846	-0.197101	1
BCAR3	1.76434	2.05927	2.45615	0.78007	0.37712
AL109613.1	0.0591186	1.73999	4.44889	-0.172035	1
AL049796.1	0.236475	2.45301	4.44165	0.278406	0.597748
DNTTIP2	60.2796	1.06206	0.909277	1.27639	0.258572	0.714397
GCLM	25.3547	-0.327416	1.03877	0.106588	0.744062	0.921898
ABCA4	0
AC093579.1	0
ARHGAP29	0
ARHGAP29-AS1	0
AC097059.1	0
AC118469.2	0.0591186	1.73999	4.44889	-0.172035	1
ABCD3	6.6589	-0.564355	1.55245	0.143599	0.704729
F3	0
AC093117.1	0
SLC44A3	0
CNN3	2.27327	4.72038	2.68965	2.61591	0.105797
AC105942.1	0
ALG14	3.44463	0.488437	1.89576	0.0796245	0.777807
AC095033.1	0
TLCD4	0
AC092802.3	0
AC092802.1	0
RWDD3	11.1231	1.11346	1.34916	0.680426	0.40944	0.789692
AC092802.2	0.0230464	0.538212	4.43547	-0.465678	1
AC092802.4	0
LINC01760	0
LINC01650	0
AL445218.1	0
LINC01761	0
LINC02607	0
AL683887.1	0
LINC02790	0
LINC01787	0
PTBP2	17.5461	-0.376003	1.31549	0.0912551	0.762588	0.928382
DPYD	80.9354	-0.909316	0.866409	1.1314	0.287476	0.721382
DPYD-AS1	4.44556	-1.78604	1.87115	0.976654	0.323026
DPYD-IT1	0
DPYD-AS2	0
MIR137HG	0
BX005019.1	0
AC104453.1	0
LINC01776	0
SNX7	1.39455	3.91406	3.06615	1.60789	0.204789
PLPPR5	0
AL445433.2	0
PLPPR4	0
LINC01708	0
PALMD	0
FRRS1	0.174351	-0.0639681	4.4117	-0.0945815	1
AGL	12.5778	0.609687	1.34196	0.208916	0.647618	0.888124
AC118553.1	0.0691393	-0.139337	4.42357	-0.200197	1
SLC35A3	9.99645	-0.00588061	1.45305	0.0253146	0.873586
MFSD14A	34.9534	0.38561	0.960054	0.16292	0.686482	0.899736
AC093019.2	1.09821	-0.0707371	3.10745	0.0432968	0.835167
SASS6	7.94903	0.813057	1.44282	0.322897	0.569872
TRMT13	8.6352	1.14995	1.40642	0.671747	0.412443
LRRC39	0.348702	-0.364358	4.4029	-0.00740994	1
DBT	4.59014	-0.461587	1.82985	0.0698829	0.791507
AL445928.2	0.0921858	-0.356952	4.42076	-0.128313	1
RTCA-AS1	0.782371	0.482594	3.29486	0.00929824	0.923181
RTCA	37.2248	0.0625469	0.962305	0.00861313	0.926057	0.972314
AC104457.2	0
CDC14A	82.608	-2.04288	0.899292	5.28673	0.0214886	0.495279
AL589990.1	0.404815	-1.05002	4.40405	0.132586	0.715766
GPR88	0.0821651	1.00995	4.42846	-0.197101	1
LINC01349	0
AC099670.3	0
VCAM1	59.8699	4.35883	1.09149	12.3721	0.000435797	0.0547459
EXTL2	9.47563	2.51924	1.39339	3.07189	0.0796569
AC104506.1	0.0460929	0.14051	4.42785	-0.298021	1
SLC30A7	20.047	-0.281462	1.03497	0.0792741	0.778284	0.930991
DPH5	6.74095	0.789104	1.56607	0.2683	0.604474
AC093157.2	0.0591186	1.73999	4.44889	-0.172035	1
AC093157.1	1.83971	-2.14448	2.60448	0.943158	0.331467
AL109741.1	0.138279	-0.687734	4.4172	-0.020223	1
S1PR1	21.2189	-3.81307	1.25154	8.83436	0.00295611	0.211632
LINC01307	0
LINC01709	0
OLFM3	0
AC114485.1	0.0230464	0.538212	4.43547	-0.465678	1
AC099567.1	0
COL11A1	0
AC095032.2	0
AC095032.1	0.772351	1.04905	3.28125	0.098638	0.75347
RNPC3	17.734	0.315783	1.06993	0.0870711	0.767934	0.92942
AMY2B	0.47696	-0.385459	4.26168	0.0158383	0.89985
AMY2A	0
AMY1A	0
AMY1B	0
AMY1C	0
AL591888.1	0
LINC01676	0.0460929	0.14051	4.42785	-0.298021	1
LINC01677	0
AL355306.2	0
LINC01661	0
PRMT6	4.81711	-1.66202	1.6858	1.00261	0.316679
NTNG1	0
VAV3	13.6503	3.90088	1.47987	5.95932	0.0146396	0.461531
VAV3-AS1	1.09079	3.77064	3.23232	1.3204	0.25052
LINC02785	0
SLC25A24	38.647	-0.684048	0.926785	0.554268	0.456579	0.806816
AL359258.2	1.54305	0.51833	2.59855	0.0568927	0.811476
NBPF4	0
AL359258.1	0
AL390038.1	0
NBPF6	0
FAM102B	62.5241	0.266868	0.932114	0.0839961	0.771953	0.930464
HENMT1	15.9925	-0.043169	1.0827	0.00473653	0.945131	0.972314
AL160171.1	0.24349	-0.465994	4.40796	-0.0170063	1
PRPF38B	91.1804	0.368935	0.847733	0.186452	0.665886	0.894557
FNDC7	0.151304	0.114782	4.41373	-0.122267	1
AL591719.2	0
STXBP3	21.3956	-0.832516	1.06246	0.627119	0.428414	0.7928
AKNAD1	2.40585	-2.3792	2.40766	1.25662	0.262292
SPATA42	0
GPSM2	3.91468	-1.30406	1.918	0.574343	0.448538
CLCC1	3.30083	0.248011	2.05278	0.0161628	0.898835
WDR47	16.0277	0.900229	1.2899	0.497874	0.480436	0.817016
TAF13	13.6932	1.29514	1.30381	0.973368	0.323842	0.744009
AL356488.3	0.210423	0.418168	4.4102	-0.0867191	1
TMEM167B	14.4518	1.84383	1.26518	2.04083	0.153126	0.664877
AL356488.2	0.200402	1.54037	4.42274	0.0421664	0.837303
C1orf194	0.118237	2.04338	4.4454	0.060492	0.80572
KIAA1324	2.52583	0.718267	2.04201	0.128226	0.720279
SARS	47.314	-0.0575731	0.926031	0.00596072	0.93846	0.972314
CELSR2	0.266537	-0.571673	4.40713	0.00688208	0.933885
PSRC1	1.42181	-0.523068	2.72943	0.00661481	0.935178
MYBPHL	0
SORT1	3.91296	3.68987	2.16939	2.50905	0.113194
PSMA5	107.271	0.939653	0.867419	1.10698	0.29274	0.723692
SYPL2	0
ATXN7L2	2.06796	0.0976477	2.29026	0.0396271	0.842212
CYB561D1	5.27616	-0.502015	1.63501	0.118917	0.730212
AMIGO1	0
GPR61	0
AL355310.3	0
GNAI3	55.3238	0.0921869	0.878257	0.0109856	0.916525	0.971842
AL355310.1	0
GNAT2	0
AMPD2	5.72766	0.629247	1.57705	0.168731	0.681242
AL355310.2	0
GSTM4	4.87569	3.2842	1.79009	3.00456	0.0830304
GSTM2	0.223449	1.14267	4.41509	-0.0126888	1
GSTM1	0
AC000032.1	0.0230464	0.538212	4.43547	-0.465678	1
GSTM5	0
AL158847.1	0
GSTM3	2.19295	3.44294	2.23057	2.2105	0.137075
EPS8L3	0
LINC01768	0.821651	0.759559	3.46742	0.0800919	0.777173
AL450468.1	0
AL450468.2	0
CSF1	224.911	2.46451	0.881189	6.42971	0.0112227	0.410553
AHCYL1	20.6575	1.37775	1.22316	1.2299	0.267427	0.715256
STRIP1	15.4704	-0.345553	1.10672	0.101527	0.750005	0.924044
AL160006.1	0.0921858	-0.356952	4.42076	-0.128313	1
ALX3	0
LINC01397	0
UBL4B	0
SLC6A17	0
AL355990.1	0
AL355990.2	0
LINC02586	0
KCNC4	1.517	-0.0845094	2.62254	-0.00241697	1
RBM15-AS1	1.75348	0.485596	2.4701	0.0440432	0.833773
RBM15	15.7484	0.505964	1.097	0.208495	0.64795	0.888375
LAMTOR5-AS1	4.50081	-0.943042	1.73762	0.337834	0.561082
SLC16A4	2.76912	0.746399	2.01596	0.145174	0.70319
AL355488.1	0.394795	-0.533872	4.40176	0.0231005	0.879196
LAMTOR5	104.018	0.688374	0.849361	0.630894	0.427028	0.792626
PROK1	0
AL358215.1	0
AL358215.2	0
CYMP-AS1	0
KCNA10	0
KCNA2	0.0691393	-0.139337	4.42357	-0.200197	1
AL365361.1	7.72184	-1.70446	1.36275	1.59596	0.206477
KCNA3	12.1524	0.537439	1.35008	0.152578	0.696084	0.903244
CD53	249.283	0.181871	0.854508	0.0448313	0.832315	0.947032
AL360270.2	0.151304	0.114782	4.41373	-0.122267	1
AL360270.1	0.854718	0.334075	3.41883	0.0343559	0.852952
LRIF1	13.8464	1.00475	1.29065	0.610275	0.434684	0.794849
AL360270.3	0.338681	0.181944	4.4032	-0.0450192	1
DRAM2	14.9531	1.75552	1.27505	1.82029	0.177279	0.675531
CEPT1	7.03865	0.0768494	1.50497	0.0108323	0.917107
AL355816.1	0
AL355816.2	0.795397	0.906978	3.24663	0.07038	0.790784
DENND2D	31.4624	0.412464	0.984733	0.177517	0.673516	0.895927
CHI3L2	0.325655	-0.268286	4.4036	-0.0226453	1
CHIA	0
AL356387.1	0
PIFO	0
OVGP1	0.0230464	0.538212	4.43547	-0.465678	1
AL390195.2	0.0460929	0.14051	4.42785	-0.298021	1
AL390195.1	0.0230464	0.538212	4.43547	-0.465678	1
WDR77	10.5048	1.99712	1.38669	1.99523	0.157795
ATP5PB	116.695	1.0492	0.87569	1.34429	0.246279	0.714397
C1orf162	2.82353	3.34573	2.30429	1.98732	0.158621
TMIGD3	0
ADORA3	0
RAP1A	157.581	-0.228428	0.848513	0.0730614	0.78693	0.933049
LINC01160	0.141284	1.31333	4.42495	-0.0529918	1
INKA2	7.11074	-2.58339	1.63216	2.71539	0.0993846
INKA2-AS1	0.115232	-0.535701	4.41874	-0.0700254	1
AL049557.1	0.0821651	1.00995	4.42846	-0.197101	1
DDX20	3.72668	1.52237	1.90614	0.649381	0.420334
KCND3	0
KCND3-IT1	0
KCND3-AS1	0
LINC01750	0
AL445426.1	0
CTTNBP2NL	3.87244	1.62276	1.90633	0.760156	0.38328
WNT2B	0.710429	-0.37662	3.65685	0.0530301	0.817872
AL354760.1	0.0591186	1.73999	4.44889	-0.172035	1
ST7L	8.14382	0.416218	1.45561	0.0862696	0.768974
CAPZA1	109.755	0.0224051	0.848301	0.000697561	0.978929	0.985808
MOV10	7.57232	0.987805	1.44908	0.476636	0.48995
AL603832.1	0.631067	0.828143	3.89689	0.0464688	0.829326
RHOC	168.335	3.60416	1.12719	7.72403	0.00544908	0.285669
PPM1J	0
AL603832.2	0
TAFA3	0
LINC01356	0
LINC01357	0.0230464	0.538212	4.43547	-0.465678	1
SLC16A1	14.1323	0.964544	1.30646	0.544419	0.460607	0.808091
SLC16A1-AS1	10.179	0.25648	1.4627	0.0314276	0.85929
AL390242.1	0.118237	2.04338	4.4454	0.060492	0.80572
LRIG2-DT	0.466939	0.0443816	4.2986	-0.0198064	1
LRIG2	7.58755	0.153041	1.46813	0.0170369	0.896151
MAGI3	0.638285	-0.838831	3.80137	0.134723	0.713585
PHTF1	23.3546	1.4147	1.2063	1.32423	0.249834	0.714397
RSBN1	30.299	-0.163029	1.0231	0.0289543	0.864885	0.958614
AL137856.1	11.5109	2.06298	1.55162	1.66914	0.196373	0.686349
PTPN22	178.522	1.46854	0.893855	2.46081	0.116719	0.651212
AP4B1-AS1	0.657321	0.763116	3.76886	0.0552649	0.814143
BCL2L15	0.138279	-0.687734	4.4172	-0.020223	1
AP4B1	11.1111	1.2541	1.33054	0.885432	0.346718	0.755773
DCLRE1B	2.29051	0.966256	2.37733	0.202555	0.652666
HIPK1-AS1	0.161325	-0.820212	4.41599	0.0236954	0.877663
HIPK1	38.501	-0.634115	0.949354	0.464554	0.495503	0.823929
OLFML3	0.197397	-0.216001	4.41016	-0.0677343	1
AL591742.2	0
SYT6	0
AL121999.1	0.0230464	0.538212	4.43547	-0.465678	1
TRIM33	46.1059	-0.258399	0.932247	0.0813778	0.775439	0.930464
BCAS2	42.3479	3.07247	1.15015	6.04043	0.0139819	0.460848
DENND2C	0.105212	0.612244	4.42082	-0.177211	1
AMPD1	0.0230464	0.538212	4.43547	-0.465678	1
NRAS	19.6788	1.36281	1.22395	1.20505	0.272314	0.716287
CSDE1	101.575	0.384756	0.841767	0.204614	0.651022	0.888431
SIKE1	18.5095	2.00564	1.21426	2.5721	0.108763	0.651212
SYCP1	0
TSHB	0
TSPAN2	15.8877	-2.58326	1.16353	4.84487	0.0277284	0.528985
LINC01765	0.0460929	0.14051	4.42785	-0.298021	1
AL049825.1	0
NGF-AS1	0.0230464	0.538212	4.43547	-0.465678	1
NGF	0
AL512638.3	0
VANGL1	12.9258	-0.615437	1.15652	0.293866	0.587754	0.862653
CASQ2	0
NHLH2	0
LINC01649	0
SLC22A15	0.0591186	1.73999	4.44889	-0.172035	1
AL365318.1	0
MAB21L3	0
LINC01779	0
AL355538.1	0
ATP1A1	43.9439	-0.908892	1.00992	0.813795	0.367001	0.76577
ATP1A1-AS1	1.22025	-0.864004	2.81192	0.136622	0.711662
LINC01762	1.71746	-1.46536	2.66032	0.453232	0.500804
AL136376.1	0
AL390066.1	0.845703	-1.35424	3.40349	0.320938	0.571044
AL390066.2	0.0460929	0.14051	4.42785	-0.298021	1
CD58	62.4046	0.461272	0.894692	0.259721	0.610312	0.871669
IGSF3	0.937836	2.94009	3.40807	1.01537	0.313619
C1orf137	0
CD2	530.647	0.0771915	0.805808	0.00914907	0.923798	0.972314
AL157904.1	0
PTGFRN	0
CD101	0.937836	2.94009	3.40807	1.01537	0.313619
AL445231.1	0.174351	-0.0639681	4.4117	-0.0945815	1
TTF2	10.3759	0.45577	1.36953	0.117098	0.732204
TRIM45	0.151304	0.114782	4.41373	-0.122267	1
VTCN1	0
LINC01525	0
AL358072.1	0
MAN1A2	64.4583	-0.812785	0.871785	0.890497	0.345343	0.755162
AL157902.1	0.0460929	0.14051	4.42785	-0.298021	1
TENT5C	110.941	1.92845	0.904093	4.0179	0.0450197	0.582293
GDAP2	14.5501	1.03625	1.31029	0.631184	0.426921	0.792626
WDR3	6.08584	1.36024	1.61187	0.721464	0.395664
SPAG17	0
AL391557.1	0
TBX15	0
AL139420.1	0
AL139420.2	0
WARS2	11.926	1.25513	1.32696	0.894344	0.344303	0.754069
WARS2-IT1	0.105212	0.612244	4.42082	-0.177211	1
WARS2-AS1	11.6903	1.02239	1.32364	0.600042	0.438562	0.797146
AL359915.1	0.197397	-0.216001	4.41016	-0.0677343	1
LINC01780	0
HAO2	0
HAO2-IT1	0
HSD3B2	0
HSD3B1	0
LINC00622	0
ZNF697	0.515835	2.67087	4.44003	0.421863	0.516009
PHGDH	3.74603	1.62953	1.8301	0.806329	0.369208
HMGCS2	0
REG4	0.105212	0.612244	4.42082	-0.177211	1
ADAM30	0
NOTCH2	19.2232	-1.19501	1.08695	1.23257	0.266908	0.715256
AC245008.1	0
SEC22B	19.6952	1.52341	1.27943	1.35782	0.243915	0.713666
AC253572.1	0
NBPF26	9.85694	-1.6638	1.25019	1.83563	0.175464
AC253572.2	5.52449	1.15614	1.71429	0.500926	0.479093
PPIAL4A	0
LINC00623	23.7341	-0.871206	1.02576	0.754141	0.385168	0.774057
FCGR1B	0
AC244453.3	0
AC244453.2	0
AC244453.1	0
FAM72B	1.42366	0.0185691	2.61083	0.0186456	0.891388
SRGAP2C	11.7998	-0.0154685	1.37595	0.0140471	0.905655	0.970396
SRGAP2-AS1	0.200402	1.54037	4.42274	0.0421664	0.837303
LINC02798	6.53934	0.092875	1.64257	0.0278785	0.867395
AL592494.1	0
AL592494.2	0.105212	0.612244	4.42082	-0.177211	1
LINC01691	0.901764	1.90783	3.4904	0.562195	0.453377
LINC02799	0
AC239800.2	0.115232	-0.535701	4.41874	-0.0700254	1
LINC02591	2.06215	-0.740672	2.49375	0.161437	0.687837
HIST2H3PS2	0
AC246680.1	0
FAM72C	0.174351	-0.0639681	4.4117	-0.0945815	1
IGKV1OR1-1	0
LINC02802	3.96326	1.41121	1.94225	0.543978	0.460789
PPIAL4E	0
AC246785.3	0.946701	0.611503	3.04304	0.0302845	0.861846
NBPF15	10.8224	0.122943	1.31849	0.00857988	0.926199	0.972314
PPIAL4F	0
LINC01632	0
FP700111.1	0.0230464	0.538212	4.43547	-0.465678	1
SRGAP2B	10.8279	-1.14228	1.23058	0.863245	0.352832	0.759017
FAM72D	0.115232	-0.535701	4.41874	-0.0700254	1
PPIAL4D	0
AC245014.3	4.90024	1.07227	1.7574	0.415082	0.519401
AC245014.1	0.0591186	1.73999	4.44889	-0.172035	1
NBPF20	2.41224	1.44209	2.21799	0.428417	0.512767
AC239860.4	0
GPR89A	5.12105	-0.243491	1.66969	0.0511689	0.821042
PDZK1	0.657118	2.34939	3.49806	0.48868	0.484517
CD160	1.82842	2.11278	2.32233	0.884089	0.347084
RNF115	65.6862	0.639756	0.904635	0.490203	0.483837	0.817747
POLR3C	14.052	2.10531	1.27472	2.58291	0.108023	0.651212
NUDT17	1.57892	1.43589	2.72969	0.360994	0.547955
PIAS3	5.86544	0.531616	1.60283	0.113607	0.736074
ANKRD35	2.14871	3.21545	2.31946	1.80328	0.179317
ITGA10	0.533073	-0.937216	4.07911	0.137998	0.710279
AC243547.1	0
PEX11B	19.7874	-0.299129	1.13065	0.0829883	0.773288	0.930464
RBM8A	145.936	0.766807	0.823866	0.829226	0.362497	0.760877
LIX1L-AS1	1.24931	0.232187	2.74861	0.0135865	0.907208
LIX1L	24.2821	-0.458574	1.01814	0.204885	0.650807	0.888431
ANKRD34A	0.138279	-0.687734	4.4172	-0.020223	1
AC243547.2	0.0230464	0.538212	4.43547	-0.465678	1
POLR3GL	65.4987	0.147033	0.902105	0.0280593	0.86697	0.959692
TXNIP	150.254	-1.76724	0.859868	4.28874	0.0383655	0.561499
HJV	0.0230464	0.538212	4.43547	-0.465678	1
AC239799.2	0.841692	0.103325	3.43704	0.0265526	0.870558
LINC01719	0.361727	0.0644286	4.4022	-0.0380478	1
NBPF10	4.06588	0.509621	1.76108	0.0874015	0.767507
NOTCH2NLA	0.536078	-0.205084	4.07112	0.00739749	0.93146
AC239799.1	0
PPIAL4H	0
AC245407.2	0.628264	-0.472242	3.8297	0.0567744	0.811669
NBPF12	9.60628	-1.86754	1.32156	2.1006	0.147241
AC244394.2	0
PRKAB2	10.5399	-0.875851	1.2388	0.496499	0.481043
AC242426.2	3.43946	0.897039	1.82731	0.248913	0.617842
FMO5	0.575156	0.772922	3.96549	0.0393687	0.84272
CHD1L	2.4385	1.29595	2.17341	0.384644	0.535128
LINC00624	0.651311	-0.530747	3.7777	0.0708958	0.790037
BCL9	2.92758	1.87734	2.02557	0.886071	0.346544
ACP6	10.0183	3.88577	1.50118	5.78891	0.0161276
AC241644.1	0
GJA5	0
AC241644.3	0
AC241644.2	0
GJA8	0
GPR89B	8.98739	-1.29398	1.31126	1.02593	0.311117
AC239803.1	0
LINC02804	0.115232	-0.535701	4.41874	-0.0700254	1
NBPF11	4.52629	0.696156	1.78556	0.171483	0.678797
LINC02805	0.0230464	0.538212	4.43547	-0.465678	1
AC239809.3	0
LINC01731	0
LINC01138	21.5942	-1.25935	1.04059	1.52775	0.216451	0.695076
LINC02806	0
AC245100.1	0
AC245100.6	0
PPIAL4G	0.253511	-1.22759	4.41287	0.16379	0.685691
NBPF14	10.6575	-1.08272	1.22169	0.844621	0.358079	0.760764
NOTCH2NLB	0
NUDT4B	0.0230464	0.538212	4.43547	-0.465678	1
PDE4DIP	10.9006	0.850055	1.40059	0.392021	0.531239	0.836957
AC239802.1	0
AC239802.2	0
AC239804.1	0
NBPF9	2.01701	-0.331906	2.34468	0.0161629	0.898835
AC245297.3	20.0343	-0.630759	1.09359	0.334308	0.563133	0.853481
AC245297.2	0.0821651	1.00995	4.42846	-0.197101	1
NOTCH2NLC	1.3908	-0.0655732	2.84643	0.0489212	0.824951
NBPF19	9.16646	-1.68131	1.33432	1.68886	0.193752
PPIAL4C	0
AC242842.1	0.92065	-0.0450455	3.11616	-0.00116509	1
FCGR1A	0
HIST2H2BF	2.52182	1.82195	2.07133	0.783892	0.375954
AC243772.2	0
HIST2H3D	0.138279	-0.687734	4.4172	-0.020223	1
HIST2H4A	0.584974	1.24026	4.01271	0.113168	0.736565
HIST2H3C	0
HIST2H2AA3	0
HIST2H2AA4	0.289583	-0.667745	4.40643	0.0298431	0.862847
HIST2H3A	0
HIST2H4B	0
AC239868.1	0.993949	0.764088	3.35575	0.175112	0.675608
HIST2H2BE	0.901817	-1.81151	3.32083	0.539075	0.462816
HIST2H2AC	16.627	-0.176482	1.09056	0.0277791	0.867629	0.959692
HIST2H2AB	1.97978	-0.579176	2.3294	0.111482	0.738463
BOLA1	3.36873	-0.457172	1.98911	0.0767072	0.78181
SV2A	1.49696	0.661907	2.62384	0.0911611	0.762706
SF3B4	53.4216	3.04362	1.13519	5.99798	0.0143222	0.461531
MTMR11	0.105212	0.612244	4.42082	-0.177211	1
OTUD7B	9.85626	0.650112	1.41663	0.213559	0.643992
AC244033.2	0.0691393	-0.139337	4.42357	-0.200197	1
VPS45	14.6847	1.27262	1.36483	0.850727	0.356347	0.760764
PLEKHO1	47.2036	0.735726	0.901259	0.641083	0.423319	0.790351
AC242988.2	0.0230464	0.538212	4.43547	-0.465678	1
ANP32E	67.5625	-0.0408483	0.89679	0.00323454	0.954646	0.975522
AC242988.1	0
CA14	3.44622	4.60458	2.07918	4.01438	0.0451137
APH1A	44.5914	1.98408	1.15812	2.65932	0.102945	0.64783
C1orf54	0.572151	0.0253171	3.97035	-0.00126161	1
CIART	0.0230464	0.538212	4.43547	-0.465678	1
MRPS21	96.9261	1.92962	1.20394	2.27103	0.131812	0.651212
PRPF3	20.1098	-0.0680035	1.02818	0.00471983	0.945228	0.972314
RPRD2	38.2842	-0.983091	0.949371	1.10618	0.292914	0.723692
TARS2	7.29171	0.805302	1.49209	0.298119	0.585064
ECM1	2.59592	1.59307	2.38648	0.482731	0.487188
FALEC	0.993949	0.764088	3.35575	0.175112	0.675608
AL356356.1	0.572151	0.0253171	3.97035	-0.00126161	1
ADAMTSL4	0.32866	0.827804	4.40642	-0.0126088	1
ADAMTSL4-AS1	15.4971	-0.371021	1.57712	0.0696061	0.791911	0.934982
MCL1	237.586	0.91629	0.81505	1.19691	0.273939	0.716878
ENSA	112.952	0.459107	0.837018	0.293499	0.587987	0.862653
GOLPH3L	5.69595	0.732363	1.56818	0.22649	0.634139
HORMAD1	0.207418	-1.04341	4.41417	0.0993654	0.752592
CTSS	62.3682	0.782328	0.882804	0.75772	0.384043	0.773897
CTSK	1.32266	-1.36913	2.89957	0.376261	0.539611
ARNT	16.9458	-0.820463	1.09234	0.583832	0.444814	0.801508
CTXND2	0
SETDB1	13.8782	-1.69455	1.24319	1.93182	0.16456	0.673299
CERS2	38.2551	-0.262058	0.924995	0.0807556	0.776276	0.930464
AL590133.2	0.0230464	0.538212	4.43547	-0.465678	1
AL590133.1	0.0460929	0.14051	4.42785	-0.298021	1
ANXA9	0.118237	2.04338	4.4454	0.060492	0.80572
MINDY1	2.62001	2.64858	2.05578	1.60321	0.205449
PRUNE1	3.36636	0.288477	1.94253	0.0552745	0.814127
BNIPL	0.279562	-0.0450927	4.40542	-0.0521652	1
C1orf56	0.279562	-0.0450927	4.40542	-0.0521652	1
CDC42SE1	114.106	-0.43196	0.833697	0.273289	0.601134	0.868942
MLLT11	5.30976	2.22715	1.63534	1.79452	0.180376
GABPB2	10.0034	-0.538612	1.42196	0.166531	0.683213
AL592424.1	0
SEMA6C	0.0691393	-0.139337	4.42357	-0.200197	1
TNFAIP8L2	12.603	-3.8089	1.40361	6.72742	0.0094942	0.383394
SCNM1	35.6011	0.256479	0.945817	0.0730692	0.786919	0.933049
LYSMD1	0.256516	0.0873851	4.40664	-0.0657466	1
TMOD4	0
VPS72	18.228	1.7306	1.24489	1.84181	0.174739	0.674228
PIP5K1A	11.6771	-0.219781	1.44827	0.0355505	0.850447	0.953392
PSMD4	70.2505	2.00607	1.16564	2.6305	0.104829	0.651119
ZNF687-AS1	0.667139	1.21823	3.4891	0.129022	0.719448
ZNF687	1.02606	-0.388235	3.18218	0.0700916	0.791204
PI4KB	11.6579	0.0494238	1.42295	0.0195374	0.888837	0.967592
AL391069.3	0
RFX5	14.7545	1.70838	1.27079	1.74133	0.18697	0.682085
AL391069.1	0
AL391069.2	0.223449	1.14267	4.41509	-0.0126888	1
SELENBP1	0.634072	3.10127	3.84393	0.679077	0.409905
PSMB4	62.7366	1.47217	1.19494	1.40611	0.235704	0.708157
POGZ	17.144	-0.416302	1.37735	0.109805	0.740366	0.921666
CGN	0.0230464	0.538212	4.43547	-0.465678	1
TUFT1	0.423851	1.33108	4.40715	0.0847753	0.770927
AL365436.2	0
SNX27	9.51243	-0.27841	1.4241	0.0537515	0.816659
AL391335.1	0.0230464	0.538212	4.43547	-0.465678	1
CELF3	0
AL589765.1	0
RIIAD1	0
AL589765.7	0.0230464	0.538212	4.43547	-0.465678	1
MRPL9	27.3859	2.2087	1.17235	3.24052	0.0718377	0.646393
OAZ3	0.680165	1.92878	3.44377	0.342537	0.558369
AL589765.4	0.0230464	0.538212	4.43547	-0.465678	1
AL589765.2	0
AL589765.5	0.0230464	0.538212	4.43547	-0.465678	1
TDRKH	2.41224	1.44209	2.21799	0.428417	0.512767
TDRKH-AS1	1.32426	1.95637	2.7336	0.568464	0.45087
AL589765.6	0
LINGO4	0
RORC	0
C2CD4D	0.115232	-0.535701	4.41874	-0.0700254	1
[truncated: 34,602 more rows]
