# Supplementary material for: Patient-derived xenografts and single-cell sequencing identifies three subtypes of tumor-reactive lymphocytes in uveal melanoma metastases
Source: bioRxiv preprint, doi:10.1101/2023.05.16.540908, version 2 (2024-05-21)
Supplement: Supplementary Table 5 [file 540908_file06.xlsx]

## Sheet: F3.0_DE_Annotated_subclust11_Ma
p_val	avg_log2FC	pct.1	pct.2	p_val_adj	cluster	gene
0	3.73868	0.571	0.113	0	4	COL5A3
0	3.71904	0.525	0.122	0	4	LTK
0	3.38644	0.5	0.105	0	4	AL136456.1
0	2.8621	0.533	0.216	0	4	PTPRM
0	3.08509	0.432	0.123	0	4	PTPN13
0	3.25924	0.378	0.119	0	4	PTGDS
0	2.6545	0.542	0.308	0	4	TNFRSF25
0	3.09883	0.306	0.091	0	4	RORC
0	1.72392	0.798	0.741	0	4	PLEC
0	0.823901	0.957	0.974	0	4	MT-ND1
0	0.873677	0.967	0.983	0	4	MT-ND3
0	0.936512	0.965	0.981	0	4	MT-ND4
0	1.40115	0.863	0.85	0	4	MYO1F
0	0.793836	0.973	0.982	0	4	MT-ND5
0	1.22522	1	0.996	0	4	MALAT1
0	0.997536	0.973	0.976	0	4	MT-ATP8
0	1.3413	0.979	0.977	0	4	MTRNR2L12
0	0.916521	0.991	0.993	0	4	MT-ND4L
0	0.922465	0.998	0.997	0	4	MT-CO1
0	0.944985	0.997	0.996	0	4	MT-CO2
0	0.941407	0.995	0.994	0	4	MT-ATP6
0	0.902888	0.996	0.995	0	4	MT-CYB
0	0.850321	0.995	0.995	0	4	MT-CO3
1.52e-292	0.82237	0.893	0.942	3.63e-288	4	MT-ND2
1.24e-238	1.86776	0.581	0.464	2.97e-234	4	RORA
2.39e-231	0.880843	0.845	0.91	5.7e-227	4	RNF213
1.38e-214	0.757675	0.962	0.976	3.29e-210	4	AHNAK
2.59e-208	1.80259	0.546	0.423	6.19e-204	4	RUNX2
3.59e-205	1.17009	0.705	0.758	8.58e-201	4	EML4
4.82e-198	0.852765	0.85	0.881	1.15e-193	4	FLNA
5e-182	1.8627	0.528	0.418	1.2e-177	4	CAMK1D
2.93e-168	1.55914	0.532	0.412	6.99e-164	4	RAP1GAP2
2.37e-166	1.89247	0.397	0.237	5.65e-162	4	FRY
1.36e-165	1.7732	0.526	0.439	3.24e-161	4	SSBP3
5.56e-155	0.833451	0.778	0.849	1.33e-150	4	MT-ND6
1.64e-154	2.35783	0.344	0.196	3.92e-150	4	ARHGEF12
3.15e-152	0.961856	0.72	0.81	7.51e-148	4	ANKRD12
1.19e-145	1.23296	0.634	0.636	2.83e-141	4	CDC14A
1.45e-139	2.35294	0.343	0.205	3.46e-135	4	PRR5
4.81e-137	1.13748	0.631	0.634	1.15e-132	4	CD6
6.41e-135	0.897385	0.804	0.905	1.53e-130	4	NEAT1
1.03e-132	1.37094	0.565	0.514	2.45e-128	4	PRKCA
3.58e-130	2.36322	0.37	0.246	8.56e-126	4	MAP3K4
2.33e-128	1.93914	0.455	0.363	5.55e-124	4	LINC00299
1.01e-124	0.892353	0.686	0.792	2.41e-120	4	STK10
5.22e-120	2.04808	0.429	0.321	1.25e-115	4	LINC00486
9.84e-117	1.55992	0.542	0.524	2.35e-112	4	NBEAL2
2.22e-113	1.4763	0.541	0.516	5.29e-109	4	SPIDR
3.48e-113	1.99705	0.525	0.458	8.31e-109	4	AL627171.2
5.7e-105	2.06919	0.372	0.269	1.36e-100	4	BCR
7.76e-103	1.51927	0.404	0.285	1.85e-98	4	PTPRG
3.1e-102	1.47777	0.494	0.443	7.41e-98	4	SLCO3A1
4.92e-99	0.600587	0.773	0.902	1.18e-94	4	IKZF1
1.1e-98	1.27789	0.52	0.473	2.64e-94	4	SPOCK2
5.71e-94	1.18712	0.612	0.703	1.36e-89	4	ARHGEF1
1.74e-90	0.902951	0.664	0.787	4.15e-86	4	FNBP1
1.11e-85	1.3966	0.532	0.552	2.64e-81	4	CORO7
9.11e-85	0.720524	0.71	0.844	2.18e-80	4	CELF2
8.43e-82	1.5696	0.508	0.519	2.01e-77	4	SYTL1
7.29e-80	1.97494	0.334	0.245	1.74e-75	4	MSC-AS1
2.01e-78	0.752224	0.674	0.791	4.79e-74	4	MACF1
4.08e-70	0.330714	0.21	0.456	9.74e-66	4	ZFAS1
5.86e-70	0.750218	0.664	0.801	1.4e-65	4	CYTH1
1.09e-68	0.305821	0.161	0.367	2.61e-64	4	CHKB
3.81e-68	0.37916	0.18	0.404	9.1e-64	4	STXBP2
8.78e-68	1.76216	0.346	0.268	2.1e-63	4	ABCA7
3.26e-67	0.362253	0.144	0.337	7.79e-63	4	SIRT2
1.99e-66	0.325021	0.14	0.33	4.74e-62	4	DDX39A
1.02e-65	0.58374	0.732	0.869	2.43e-61	4	ARHGAP15
2.24e-65	0.389799	0.145	0.336	5.35e-61	4	SH3BP1
5.25e-64	1.85832	0.361	0.299	1.25e-59	4	PLCG1
7.02e-64	1.61621	0.386	0.328	1.68e-59	4	ADCY9
8.72e-64	0.312094	0.161	0.357	2.08e-59	4	ZNF800
1.48e-63	0.354041	0.174	0.383	3.52e-59	4	PKN1
1.59e-63	0.6357	0.7	0.83	3.8e-59	4	THEMIS
2.63e-63	1.75066	0.427	0.409	6.27e-59	4	NPDC1
4.58e-63	0.313513	0.129	0.305	1.09e-58	4	GMIP
2.15e-62	1.20024	0.537	0.606	5.14e-58	4	DNM2
2.24e-62	1.51905	0.427	0.395	5.35e-58	4	RASGRP2
4.6e-61	0.408511	0.224	0.47	1.1e-56	4	DPP7
7.37e-61	0.889519	0.636	0.788	1.76e-56	4	ACAP1
1.01e-60	0.353297	0.176	0.379	2.41e-56	4	SNRNP200
6.37e-60	0.350364	0.153	0.339	1.52e-55	4	SAFB
7.52e-60	0.61837	0.7	0.835	1.8e-55	4	CHST11
3.47e-59	0.436394	0.19	0.402	8.29e-55	4	CTDSP1
5.06e-59	0.446423	0.25	0.509	1.21e-54	4	ENSA
2.77e-58	0.353994	0.15	0.331	6.61e-54	4	DHX36
5.11e-58	0.446532	0.223	0.46	1.22e-53	4	RNPEPL1
1.91e-57	0.432385	0.168	0.36	4.57e-53	4	PFKP
2.46e-57	0.460747	0.173	0.369	5.88e-53	4	UPP1
2.11e-56	0.337289	0.212	0.433	5.04e-52	4	TRPV2
3.1e-56	0.357814	0.144	0.318	7.4e-52	4	SUPT5H
3.28e-56	0.852372	0.609	0.727	7.85e-52	4	BCL11B
3.33e-56	0.660778	0.67	0.807	7.94e-52	4	RABGAP1L
3.83e-56	0.303443	0.188	0.39	9.14e-52	4	TAF1D
4.15e-56	0.959121	0.574	0.674	9.92e-52	4	LRBA
1.68e-55	0.362319	0.224	0.451	4.01e-51	4	RSU1
3.03e-55	1.56684	0.415	0.394	7.23e-51	4	TBXAS1
4.94e-55	0.314355	0.191	0.393	1.18e-50	4	BOD1L1
6.03e-54	0.322688	0.14	0.306	1.44e-49	4	USP8
1.37e-53	0.352358	0.237	0.465	3.27e-49	4	WSB1
5.79e-53	0.485733	0.181	0.378	1.38e-48	4	MTCH1
1.51e-52	0.323372	0.151	0.321	3.6e-48	4	NUTM2A-AS1
2.24e-52	0.336823	0.193	0.392	5.35e-48	4	UBASH3A
1.15e-51	0.472274	0.194	0.396	2.75e-47	4	IL27RA
1.9e-51	0.562899	0.137	0.301	4.54e-47	4	PNPLA2
3.01e-51	0.328794	0.19	0.385	7.19e-47	4	GIT2
5.5e-51	0.578992	0.195	0.401	1.31e-46	4	LMF2
5.66e-51	1.04402	0.565	0.684	1.35e-46	4	TCF25
1.3e-50	0.307587	0.146	0.31	3.09e-46	4	PHF20L1
1.61e-50	0.374848	0.203	0.404	3.84e-46	4	POLR2A
1.88e-50	0.303699	0.145	0.308	4.48e-46	4	NFE2L2
1.94e-50	0.318068	0.173	0.352	4.64e-46	4	SH2D3C
2.51e-50	0.457166	0.191	0.387	5.98e-46	4	MKNK2
3.15e-50	1.50327	0.443	0.426	7.52e-46	4	FP671120.4
5.85e-50	0.32126	0.151	0.316	1.4e-45	4	MFSD6
8.3e-50	0.424111	0.202	0.405	1.98e-45	4	TNIP1
1.2e-49	0.429221	0.152	0.32	2.87e-45	4	CASC4
2.09e-49	0.314926	0.219	0.429	5e-45	4	LRRFIP2
2.17e-49	0.447907	0.244	0.477	5.19e-45	4	GLUD1
4.01e-49	0.371795	0.233	0.453	9.58e-45	4	STAT3
6.9e-49	0.427766	0.143	0.301	1.65e-44	4	USP22
3.07e-48	0.718135	0.624	0.745	7.32e-44	4	SYNE2
3.68e-48	0.390757	0.296	0.569	8.79e-44	4	BRD2
4.63e-48	0.325628	0.162	0.33	1.11e-43	4	ZBTB38
4.82e-48	0.403569	0.164	0.337	1.15e-43	4	DAZAP1
1.16e-47	0.364799	0.277	0.53	2.77e-43	4	KTN1
1.6e-47	0.348228	0.159	0.326	3.83e-43	4	CENPC
2.09e-47	0.582934	0.178	0.364	4.99e-43	4	GSDMD
2.68e-47	0.306857	0.154	0.316	6.4e-43	4	RBM26
3.97e-47	0.465484	0.176	0.355	9.47e-43	4	RTF1
1.03e-46	0.538051	0.167	0.341	2.46e-42	4	DDX21
1.33e-46	1.94682	0.309	0.255	3.17e-42	4	PDE4DIP
3.18e-46	0.484471	0.144	0.3	7.6e-42	4	RAB4B
4.45e-46	0.345662	0.186	0.366	1.06e-41	4	LARP4B
4.11e-45	0.451151	0.177	0.352	9.82e-41	4	PTPN2
4.16e-45	0.362969	0.156	0.315	9.94e-41	4	EFR3A
7.26e-45	0.506752	0.156	0.318	1.73e-40	4	VPS36
8.43e-45	0.305031	0.281	0.53	2.01e-40	4	SLTM
8.68e-45	0.370898	0.251	0.477	2.07e-40	4	TRADD
1e-44	0.324817	0.217	0.415	2.4e-40	4	CUL3
1.71e-44	0.453271	0.246	0.474	4.08e-40	4	DDX46
1.84e-44	0.40284	0.164	0.329	4.39e-40	4	HDAC7
2.13e-44	0.42997	0.157	0.318	5.1e-40	4	PTTG1IP
2.44e-44	0.310675	0.292	0.543	5.82e-40	4	MFHAS1
2.45e-44	0.331573	0.153	0.31	5.85e-40	4	HERC2
3.44e-44	0.319563	0.181	0.354	8.21e-40	4	PPP2R5E
3.86e-44	1.29994	0.442	0.452	9.21e-40	4	PIK3R5
4.29e-44	0.40834	0.17	0.338	1.03e-39	4	GPBP1L1
6.41e-44	0.474328	0.228	0.438	1.53e-39	4	MAP4K1
7.48e-44	1.64548	0.352	0.319	1.79e-39	4	CERK
7.63e-44	0.432385	0.263	0.498	1.82e-39	4	DDX39B
9.33e-44	0.344449	0.203	0.392	2.23e-39	4	PPP3R1
1.54e-43	1.28509	0.467	0.509	3.68e-39	4	KAT2B
3.36e-43	0.490005	0.238	0.455	8.03e-39	4	LFNG
5.95e-43	0.514022	0.196	0.38	1.42e-38	4	RNF10
6.02e-43	0.66343	0.187	0.371	1.44e-38	4	ACADVL
7.95e-43	0.45353	0.156	0.312	1.9e-38	4	CDC27
8.89e-43	0.417781	0.194	0.375	2.12e-38	4	UBR4
1.1e-42	0.475863	0.167	0.332	2.62e-38	4	NUMA1
1.81e-42	0.348289	0.174	0.339	4.32e-38	4	TRPM7
2.38e-42	0.455882	0.17	0.334	5.69e-38	4	ERCC5
2.88e-42	0.412375	0.164	0.325	6.89e-38	4	ARID4A
6.7e-42	0.488588	0.163	0.323	1.6e-37	4	UBE2Q2
1.68e-41	0.420952	0.187	0.361	4.01e-37	4	SCFD1
2.15e-41	0.412379	0.219	0.416	5.14e-37	4	HK1
2.26e-41	0.47635	0.26	0.491	5.41e-37	4	ZBTB7A
2.28e-41	0.405309	0.188	0.362	5.44e-37	4	PUM1
5.24e-41	0.643208	0.168	0.334	1.25e-36	4	RNF126
1.74e-40	0.344851	0.161	0.316	4.15e-36	4	AEBP2
2.77e-40	0.451743	0.169	0.328	6.61e-36	4	CREB1
5.66e-40	1.6595	0.309	0.26	1.35e-35	4	HDAC4
8.67e-40	0.480891	0.165	0.322	2.07e-35	4	PSD4
8.71e-40	0.45562	0.16	0.312	2.08e-35	4	IKBKE
1.69e-39	0.42726	0.182	0.348	4.04e-35	4	CLIP1
1.94e-39	0.337219	0.215	0.398	4.64e-35	4	KIAA2026
2.52e-39	0.399339	0.208	0.391	6.02e-35	4	MAPK14
5.29e-39	0.38055	0.242	0.447	1.26e-34	4	CNTRL
5.44e-39	0.448789	0.169	0.325	1.3e-34	4	MICU2
5.97e-39	0.412475	0.155	0.302	1.43e-34	4	CERT1
6.5e-39	1.58426	0.359	0.326	1.55e-34	4	FP236383.3
7.37e-39	0.35078	0.247	0.453	1.76e-34	4	GPATCH8
1.24e-38	0.335906	0.181	0.341	2.95e-34	4	S100PBP
1.42e-38	0.856409	0.563	0.676	3.39e-34	4	ANKRD11
2.87e-38	0.384463	0.19	0.356	6.85e-34	4	ANKIB1
5.09e-38	0.460558	0.162	0.312	1.22e-33	4	GCH1
5.26e-38	0.485851	0.162	0.312	1.26e-33	4	GALM
1.3e-37	0.439661	0.183	0.345	3.1e-33	4	SPEN
1.72e-37	0.513851	0.16	0.308	4.12e-33	4	CGAS
1.72e-37	0.439569	0.239	0.44	4.12e-33	4	RNF145
2.41e-37	0.37448	0.218	0.399	5.75e-33	4	TRA2A
2.64e-37	0.519502	0.195	0.367	6.3e-33	4	ZNFX1
3.05e-37	0.414146	0.214	0.396	7.29e-33	4	ZNF148
3.62e-37	0.420213	0.232	0.426	8.64e-33	4	NPEPPS
4.94e-37	0.83207	0.593	0.738	1.18e-32	4	MYO1G
9.48e-37	0.402929	0.249	0.451	2.26e-32	4	PHIP
1.43e-36	0.493072	0.219	0.407	3.42e-32	4	MCUB
1.5e-36	0.727156	0.196	0.37	3.59e-32	4	YME1L1
1.53e-36	0.322434	0.285	0.512	3.65e-32	4	PXN
3.23e-36	0.433431	0.188	0.349	7.71e-32	4	BBX
3.61e-36	0.384816	0.184	0.341	8.62e-32	4	WWP1
4.46e-36	0.456235	0.207	0.381	1.07e-31	4	SPAG9
7.93e-36	0.417622	0.19	0.353	1.89e-31	4	GATAD2A
1.09e-35	0.3287	0.343	0.621	2.6e-31	4	SRSF11
1.32e-35	0.40068	0.326	0.594	3.16e-31	4	DEF6
1.35e-35	0.456235	0.241	0.44	3.23e-31	4	GPBP1
1.36e-35	0.453736	0.18	0.337	3.25e-31	4	2007-03-01
1.62e-35	0.301362	0.168	0.313	3.88e-31	4	LCOR
2.07e-35	0.450097	0.158	0.3	4.94e-31	4	STRN
2.34e-35	0.402803	0.237	0.429	5.59e-31	4	NEK7
2.8e-35	0.373319	0.228	0.415	6.68e-31	4	ZNF644
3.22e-35	0.389955	0.225	0.408	7.68e-31	4	GBF1
3.7e-35	0.323837	0.247	0.439	8.84e-31	4	CD5
4.4e-35	0.420492	0.734	0.885	1.05e-30	4	LRRFIP1
4.47e-35	0.748897	0.155	0.3	1.07e-30	4	CLN3
6.8e-35	0.4362	0.25	0.455	1.62e-30	4	SMAP1
7.4e-35	0.510827	0.16	0.304	1.77e-30	4	PPP1R10
8.97e-35	0.352271	0.309	0.553	2.14e-30	4	PCM1
8.97e-35	0.486903	0.21	0.383	2.14e-30	4	ZRANB2
9.05e-35	0.489767	0.167	0.314	2.16e-30	4	ANKLE2
9.63e-35	0.518958	0.184	0.341	2.3e-30	4	HECTD1
9.82e-35	0.404815	0.282	0.504	2.35e-30	4	CHD3
1.02e-34	0.477194	0.166	0.312	2.43e-30	4	ZBTB1
1.41e-34	1.29448	0.431	0.459	3.36e-30	4	ADARB1
2.48e-34	0.311905	0.301	0.534	5.93e-30	4	VPS13C
2.54e-34	0.59327	0.248	0.457	6.06e-30	4	SIGIRR
3.41e-34	0.314401	0.262	0.465	8.14e-30	4	ERBIN
3.93e-34	0.429928	0.261	0.472	9.39e-30	4	ELOVL5
4e-34	0.420741	0.188	0.344	9.55e-30	4	ASXL2
4.14e-34	0.455645	0.186	0.341	9.89e-30	4	RPRD2
5.25e-34	0.398805	0.243	0.435	1.25e-29	4	ARIH1
5.27e-34	0.598631	0.198	0.369	1.26e-29	4	TNFRSF14
5.38e-34	0.312192	0.262	0.466	1.29e-29	4	CDK17
7.79e-34	0.387007	0.169	0.312	1.86e-29	4	QKI
8.16e-34	0.436296	0.263	0.473	1.95e-29	4	RSF1
1.18e-33	0.99086	0.539	0.669	2.82e-29	4	ARGLU1
1.58e-33	0.430665	0.162	0.302	3.78e-29	4	MAPKAP1
3.01e-33	0.323805	0.232	0.412	7.2e-29	4	DLG1
3.92e-33	0.402854	0.277	0.493	9.35e-29	4	PTPRA
6.63e-33	0.393076	0.243	0.432	1.58e-28	4	TTC17
1.72e-32	0.303619	0.284	0.493	4.11e-28	4	CAMK4
7.3e-32	1.11064	0.51	0.628	1.74e-27	4	ARHGAP45
8.13e-32	0.50102	0.223	0.401	1.94e-27	4	STX8
8.33e-32	0.382618	0.273	0.481	1.99e-27	4	ATP11B
8.56e-32	0.415994	0.187	0.337	2.04e-27	4	TMEM131
8.97e-32	0.401442	0.241	0.426	2.14e-27	4	NCOR2
1.02e-31	1.35568	0.383	0.383	2.43e-27	4	TNIK
2.08e-31	0.511674	0.174	0.319	4.97e-27	4	PPM1B
2.46e-31	0.648768	0.162	0.301	5.88e-27	4	SIRT7
3.08e-31	0.330009	0.303	0.519	7.35e-27	4	CD69
3.49e-31	0.530182	0.218	0.391	8.33e-27	4	CDC73
3.89e-31	0.363128	0.187	0.334	9.29e-27	4	MLLT3
4.35e-31	0.434912	0.231	0.41	1.04e-26	4	AP3B1
4.5e-31	0.359343	0.242	0.421	1.07e-26	4	ZCCHC7
7.43e-31	0.492994	0.23	0.408	1.77e-26	4	ASXL1
9.65e-31	0.389335	0.282	0.496	2.3e-26	4	RBL2
1.01e-30	0.423819	0.258	0.453	2.41e-26	4	C5orf56
1.66e-30	0.306907	0.311	0.537	3.97e-26	4	EIF4G3
2.36e-30	0.441974	0.188	0.336	5.64e-26	4	SPPL3
2.74e-30	0.493281	0.204	0.362	6.55e-26	4	VPS13A
3.38e-30	0.40484	0.293	0.515	8.08e-26	4	LIMS1
7.04e-30	0.514354	0.167	0.302	1.68e-25	4	RSRC1
7.28e-30	0.530939	0.228	0.402	1.74e-25	4	UBE3C
9.65e-30	0.409321	0.169	0.303	2.31e-25	4	WDR7
1.04e-29	0.570372	0.182	0.327	2.49e-25	4	MIIP
1.3e-29	0.587308	0.186	0.333	3.11e-25	4	B4GALT1
1.6e-29	0.327173	0.31	0.536	3.82e-25	4	NIPBL
1.6e-29	0.470946	0.294	0.516	3.83e-25	4	BRD4
2.31e-29	0.578358	0.185	0.331	5.51e-25	4	ABHD3
2.43e-29	0.404907	0.27	0.471	5.81e-25	4	PUM2
2.51e-29	0.444398	0.232	0.404	6e-25	4	LRRC8C
2.71e-29	0.663025	0.23	0.413	6.48e-25	4	CYBC1
2.81e-29	0.44172	0.185	0.329	6.72e-25	4	MAN2A1
4.69e-29	0.524152	0.204	0.362	1.12e-24	4	AFF4
7.01e-29	0.603296	0.204	0.363	1.68e-24	4	CHD1
8.6e-29	0.459273	0.179	0.318	2.05e-24	4	FAM120B
1.02e-28	0.505013	0.169	0.303	2.43e-24	4	CLASP2
1.16e-28	0.461168	0.236	0.412	2.76e-24	4	PARP14
1.33e-28	1.39535	0.348	0.334	3.17e-24	4	AGPAT4
2.15e-28	0.361536	0.298	0.513	5.13e-24	4	SYNRG
2.67e-28	0.56381	0.181	0.323	6.38e-24	4	WDR26
2.72e-28	0.37777	0.2	0.347	6.49e-24	4	RPS6KA5
2.81e-28	0.516884	0.192	0.339	6.72e-24	4	CD28
2.85e-28	0.419938	0.207	0.362	6.8e-24	4	DYM
8.5e-28	0.544766	0.173	0.308	2.03e-23	4	ANO6
8.52e-28	0.413963	0.285	0.491	2.03e-23	4	SETX
9.07e-28	0.495558	0.255	0.442	2.17e-23	4	VSIR
1.02e-27	0.478097	0.23	0.4	2.44e-23	4	ARFGEF1
1.38e-27	0.481382	0.188	0.331	3.29e-23	4	CNOT4
1.39e-27	1.11659	0.456	0.524	3.31e-23	4	TBC1D22A
1.91e-27	0.539953	0.226	0.393	4.56e-23	4	CABIN1
3.3e-27	0.391053	0.233	0.394	7.87e-23	4	NSD2
3.59e-27	0.420908	0.281	0.484	8.57e-23	4	WAC
5.25e-27	0.563955	0.186	0.328	1.25e-22	4	DIDO1
6.09e-27	0.512171	0.222	0.382	1.45e-22	4	EPB41
1.03e-26	0.377223	0.217	0.37	2.45e-22	4	CDKAL1
2.15e-26	0.504806	0.23	0.397	5.13e-22	4	ZNF652
2.36e-26	0.346622	0.352	0.601	5.63e-22	4	KMT2A
2.97e-26	0.570438	0.179	0.312	7.1e-22	4	TUT4
3.04e-26	0.601114	0.21	0.365	7.26e-22	4	NUFIP2
3.65e-26	0.614591	0.192	0.338	8.72e-22	4	ANKRD10
8.14e-26	0.558952	0.635	0.797	1.94e-21	4	RIPOR2
1.3e-25	0.447111	0.264	0.45	3.11e-21	4	NSD1
2.18e-25	0.543913	0.189	0.328	5.21e-21	4	EXOC2
2.75e-25	1.44061	0.347	0.346	6.56e-21	4	VCL
3.06e-25	0.490922	0.214	0.363	7.32e-21	4	MKLN1
3.45e-25	0.442681	0.267	0.455	8.25e-21	4	TRIP12
3.48e-25	0.578932	0.189	0.326	8.31e-21	4	RELCH
4.73e-25	0.97833	0.488	0.581	1.13e-20	4	GPRIN3
5.99e-25	0.601798	0.182	0.315	1.43e-20	4	HTT
6.66e-25	0.895513	0.524	0.653	1.59e-20	4	PREX1
7.99e-25	0.768172	0.173	0.305	1.91e-20	4	IRF3
1.33e-24	0.405128	0.204	0.345	3.17e-20	4	DENND4A
2.68e-24	0.886124	0.506	0.619	6.4e-20	4	RAPGEF1
2.84e-24	0.538337	0.217	0.37	6.78e-20	4	AGPAT3
2.92e-24	0.503642	0.214	0.362	6.97e-20	4	TBC1D2B
3.26e-24	0.691622	0.223	0.384	7.79e-20	4	CSNK1G2
5.04e-24	1.11621	0.444	0.507	1.2e-19	4	ZFYVE28
5.46e-24	0.506114	0.244	0.412	1.3e-19	4	PHC3
8.62e-24	0.594764	0.201	0.343	2.06e-19	4	TRPC4AP
9e-24	1.41081	0.302	0.277	2.15e-19	4	MIAT
1.67e-23	0.573001	0.18	0.307	3.98e-19	4	MLLT10
1.93e-23	0.516809	0.249	0.417	4.61e-19	4	MAP4K4
2.66e-23	0.39428	0.375	0.649	6.35e-19	4	TBC1D10C
3.47e-23	0.397859	0.348	0.595	8.28e-19	4	PAFAH1B1
5.42e-23	0.633226	0.212	0.36	1.29e-18	4	CSGALNACT2
5.46e-23	0.402953	0.23	0.383	1.31e-18	4	ITPR2
5.59e-23	0.317029	0.36	0.606	1.33e-18	4	MAP4
6.61e-23	0.650204	0.227	0.386	1.58e-18	4	MAP2K1
8.6e-23	0.814287	0.524	0.642	2.06e-18	4	SOS1
9.72e-23	0.810328	0.178	0.308	2.32e-18	4	NARF
1.15e-22	0.326999	0.336	0.563	2.75e-18	4	STAT4
1.2e-22	0.641165	0.187	0.318	2.86e-18	4	IL17RA
1.55e-22	0.647705	0.184	0.314	3.7e-18	4	C1GALT1
1.72e-22	0.563966	0.234	0.394	4.11e-18	4	CLK1
1.74e-22	0.382173	0.345	0.572	4.16e-18	4	AC004687.1
2.1e-22	0.585859	0.197	0.332	5.02e-18	4	PTPN9
2.17e-22	0.663269	0.267	0.457	5.19e-18	4	RSBN1L
2.23e-22	0.379015	0.337	0.57	5.33e-18	4	ADD3
2.26e-22	0.497245	0.255	0.429	5.39e-18	4	KAT6A
2.65e-22	0.729633	0.186	0.319	6.33e-18	4	NMRK1
2.67e-22	0.599966	0.234	0.394	6.37e-18	4	ITFG1
2.89e-22	0.371104	0.281	0.462	6.91e-18	4	FBXW7
3.03e-22	0.57059	0.189	0.317	7.24e-18	4	TRIM33
6.06e-22	0.599074	0.251	0.424	1.45e-17	4	ACIN1
6.89e-22	0.639084	0.229	0.383	1.65e-17	4	PBX4
7.99e-22	0.383288	0.365	0.619	1.91e-17	4	RNF149
1.04e-21	0.403723	0.329	0.55	2.49e-17	4	OGT
1.19e-21	0.682332	0.188	0.319	2.83e-17	4	USP4
1.2e-21	0.773396	0.55	0.7	2.87e-17	4	SPTAN1
1.81e-21	1.32078	0.375	0.399	4.31e-17	4	FAM53B
1.99e-21	0.515595	0.188	0.312	4.74e-17	4	COG5
2.17e-21	0.659401	0.242	0.407	5.18e-17	4	PHYKPL
2.33e-21	0.872678	0.508	0.62	5.56e-17	4	PPP2R5C
4.4e-21	0.820916	0.183	0.311	1.05e-16	4	PNKP
5.59e-21	0.611663	0.221	0.367	1.33e-16	4	VAV1
8.79e-21	0.595263	0.194	0.322	2.1e-16	4	TNRC6A
1.26e-20	0.773482	0.22	0.37	3.01e-16	4	GDI1
1.41e-20	0.645896	0.215	0.358	3.37e-16	4	PHF14
1.45e-20	1.06114	0.456	0.548	3.47e-16	4	FLI1
1.98e-20	0.548094	0.219	0.361	4.74e-16	4	MON2
2.64e-20	0.512468	0.266	0.441	6.3e-16	4	CCNY
3.06e-20	0.593572	0.182	0.301	7.3e-16	4	SCAF8
3.32e-20	0.501835	0.328	0.547	7.92e-16	4	RRBP1
3.82e-20	1.53545	0.308	0.301	9.13e-16	4	RARA
3.94e-20	0.513898	0.282	0.468	9.4e-16	4	ANKHD1
4.38e-20	1.32172	0.392	0.434	1.05e-15	4	DIP2A
4.58e-20	0.536715	0.204	0.334	1.09e-15	4	ATG16L1
4.66e-20	0.522749	0.266	0.437	1.11e-15	4	R3HDM2
4.67e-20	0.536026	0.189	0.311	1.11e-15	4	DDHD1
8.67e-20	0.701959	0.185	0.309	2.07e-15	4	FAM126A
9.64e-20	0.376217	0.318	0.516	2.3e-15	4	TRG-AS1
2.97e-19	0.748699	0.186	0.308	7.11e-15	4	PRKD2
4.15e-19	0.544271	0.299	0.493	9.91e-15	4	VMP1
5.49e-19	0.619304	0.186	0.306	1.31e-14	4	PKN2
7.15e-19	0.546387	0.309	0.517	1.71e-14	4	ITSN2
8.61e-19	0.391087	0.37	0.616	2.06e-14	4	CAPN2
9.79e-19	0.62081	0.199	0.325	2.34e-14	4	CDR2
1.46e-18	1.271	0.37	0.398	3.48e-14	4	PHF21A
1.58e-18	0.616754	0.267	0.435	3.78e-14	4	BDP1
2.92e-18	0.560546	0.236	0.383	6.98e-14	4	TGFBR1
3.62e-18	1.33871	0.365	0.391	8.64e-14	4	PIEZO1
4.76e-18	0.647494	0.286	0.474	1.14e-13	4	SEPTIN6
4.8e-18	0.506363	0.274	0.443	1.15e-13	4	ZNF638
5.44e-18	0.645902	0.205	0.332	1.3e-13	4	PSPC1
5.53e-18	0.354342	0.401	0.612	1.32e-13	4	JUN
5.64e-18	1.27305	0.397	0.449	1.35e-13	4	FGD3
6.39e-18	1.41573	0.333	0.344	1.53e-13	4	AFF1
6.63e-18	0.557415	0.268	0.434	1.58e-13	4	SETD2
7.18e-18	0.641082	0.202	0.328	1.72e-13	4	PPP1R21
8.32e-18	0.517109	0.243	0.39	1.99e-13	4	FBXO11
8.55e-18	0.575888	0.263	0.426	2.04e-13	4	CELF1
1e-17	1.14865	0.447	0.539	2.4e-13	4	TMC8
1.44e-17	0.556982	0.266	0.431	3.43e-13	4	EHMT1
1.5e-17	0.756701	0.557	0.738	3.58e-13	4	SRRM2
1.53e-17	0.502808	0.344	0.573	3.65e-13	4	ACAP2
1.8e-17	0.536749	0.189	0.303	4.31e-13	4	BRAF
2.28e-17	0.434102	0.291	0.46	5.45e-13	4	SMYD3
2.97e-17	0.692669	0.214	0.348	7.1e-13	4	FAM117A
3.02e-17	0.697266	0.221	0.358	7.21e-13	4	CRYBG1
3.41e-17	0.654279	0.274	0.449	8.13e-13	4	BAZ1A
4.62e-17	0.995364	0.454	0.551	1.1e-12	4	JMJD1C
6.26e-17	0.952058	0.183	0.302	1.49e-12	4	RGS14
7.46e-17	0.94855	0.477	0.597	1.78e-12	4	AAK1
1.31e-16	0.732366	0.261	0.426	3.14e-12	4	MAD1L1
1.41e-16	0.760035	0.193	0.312	3.36e-12	4	CSNK1D
1.88e-16	0.614652	0.198	0.314	4.49e-12	4	BIRC3
2.01e-16	0.653723	0.222	0.354	4.8e-12	4	LINC00649
2.28e-16	0.613487	0.227	0.364	5.45e-12	4	EP300
2.56e-16	0.547131	0.288	0.466	6.12e-12	4	UBR2
2.84e-16	0.536844	0.283	0.453	6.79e-12	4	PRRC2B
3.17e-16	0.591345	0.225	0.358	7.57e-12	4	ZMYM2
3.18e-16	0.433704	0.361	0.592	7.6e-12	4	EPC1
3.24e-16	0.571775	0.199	0.315	7.74e-12	4	MED13
3.83e-16	0.60414	0.236	0.375	9.15e-12	4	GATAD2B
4.53e-16	0.714834	0.211	0.337	1.08e-11	4	FOXJ3
4.69e-16	0.4563	0.393	0.655	1.12e-11	4	SSBP4
6.04e-16	1.34086	0.373	0.421	1.44e-11	4	MPRIP
8.98e-16	0.629006	0.233	0.37	2.14e-11	4	TAOK1
9.02e-16	0.932129	0.463	0.557	2.15e-11	4	SLFN12L
1.09e-15	0.966531	0.215	0.349	2.62e-11	4	WASHC1
1.1e-15	0.892957	0.479	0.586	2.62e-11	4	P2RY8
1.23e-15	0.54223	0.206	0.323	2.94e-11	4	KDM6A
1.33e-15	0.557067	0.256	0.404	3.17e-11	4	ARID2
1.45e-15	0.795749	0.235	0.378	3.46e-11	4	ITGA5
1.72e-15	0.493047	0.268	0.422	4.1e-11	4	PAN3
1.99e-15	0.534211	0.276	0.438	4.75e-11	4	TBL1XR1
3.33e-15	1.6106	0.345	0.377	7.96e-11	4	PFKL
3.6e-15	0.458364	0.359	0.583	8.59e-11	4	TAOK3
3.6e-15	0.496698	0.257	0.405	8.61e-11	4	DYRK1A
4.99e-15	0.740336	0.197	0.313	1.19e-10	4	PSEN1
5.52e-15	0.649563	0.211	0.33	1.32e-10	4	CBL
6.4e-15	0.57593	0.317	0.513	1.53e-10	4	KLF13
1.19e-14	1.21717	0.36	0.388	2.84e-10	4	CCDC88B
1.56e-14	0.535636	0.3	0.474	3.73e-10	4	ANKRD17
1.58e-14	1.4864	0.312	0.325	3.77e-10	4	MKNK1
1.65e-14	0.576152	0.245	0.383	3.93e-10	4	CLASP1
2.55e-14	0.542572	0.36	0.59	6.09e-10	4	CIRBP
2.62e-14	1.20067	0.384	0.436	6.27e-10	4	NLRP1
2.75e-14	0.690146	0.265	0.422	6.57e-10	4	FNBP4
2.93e-14	0.719698	0.232	0.367	6.99e-10	4	GON4L
3.52e-14	0.770753	0.196	0.307	8.4e-10	4	UBR1
4.31e-14	1.3174	0.345	0.373	1.03e-09	4	GOLGA8B
4.48e-14	0.720371	0.206	0.322	1.07e-09	4	INO80D
5.2e-14	0.362899	0.377	0.591	1.24e-09	4	ATP2B1
6.02e-14	0.634059	0.331	0.537	1.44e-09	4	PNISR
6.53e-14	0.518599	0.282	0.44	1.56e-09	4	FAM172A
7.54e-14	0.578095	0.257	0.4	1.8e-09	4	SCLT1
8.33e-14	0.693936	0.53	0.677	1.99e-09	4	UTRN
8.85e-14	0.631264	0.269	0.422	2.11e-09	4	MAST4
9.43e-14	0.592089	0.281	0.443	2.25e-09	4	COP1
1.32e-13	1.2814	0.332	0.352	3.16e-09	4	ERN1
1.49e-13	0.617211	0.24	0.371	3.56e-09	4	NCOA1
1.63e-13	1.04789	0.448	0.556	3.89e-09	4	JAK3
2.14e-13	0.416673	0.329	0.514	5.1e-09	4	NCOA2
2.66e-13	0.621425	0.224	0.345	6.35e-09	4	ARHGAP10
2.77e-13	0.766135	0.195	0.303	6.62e-09	4	ZNF131
2.94e-13	0.503049	0.342	0.545	7.03e-09	4	PDS5A
3.56e-13	0.874888	0.444	0.527	8.5e-09	4	MSI2
4.06e-13	0.736012	0.216	0.335	9.7e-09	4	ECE1
4.6e-13	0.519575	0.213	0.323	1.1e-08	4	PDE4B
4.85e-13	0.595177	0.337	0.543	1.16e-08	4	DYNC1H1
5.78e-13	0.50623	0.306	0.477	1.38e-08	4	CHD2
6.3e-13	0.659836	0.211	0.324	1.5e-08	4	LRCH3
7.08e-13	0.393875	0.381	0.6	1.69e-08	4	PRKCQ
7.6e-13	0.551331	0.199	0.301	1.82e-08	4	THADA
8.91e-13	0.618497	0.275	0.427	2.13e-08	4	USP25
1.13e-12	0.763166	0.257	0.403	2.69e-08	4	INTS6
1.22e-12	0.876689	0.456	0.556	2.9e-08	4	SIK3
1.26e-12	0.677494	0.269	0.421	3.01e-08	4	USP3
1.27e-12	0.689479	0.248	0.384	3.04e-08	4	SYNE3
1.8e-12	0.681549	0.247	0.383	4.3e-08	4	UBAC2
2.59e-12	0.706332	0.21	0.321	6.2e-08	4	AMBRA1
2.66e-12	0.648366	0.277	0.433	6.35e-08	4	ITCH
3.32e-12	1.3253	0.309	0.321	7.92e-08	4	CMIP
3.33e-12	0.706845	0.235	0.362	7.96e-08	4	BRWD1
4.2e-12	0.748449	0.309	0.493	1e-07	4	TCIRG1
4.93e-12	0.710321	0.256	0.398	1.18e-07	4	HELZ
8.02e-12	0.460612	0.399	0.648	1.92e-07	4	BIN2
1.17e-11	0.989547	0.443	0.556	2.8e-07	4	STIM1
1.33e-11	0.756782	0.239	0.367	3.18e-07	4	KLC1
2.04e-11	0.589274	0.588	0.753	4.88e-07	4	TGFB1
2.16e-11	0.704522	0.261	0.404	5.15e-07	4	SH3BP5
2.3e-11	1.14293	0.364	0.408	5.5e-07	4	KIAA0319L
2.34e-11	0.81575	0.214	0.328	5.58e-07	4	LPGAT1
2.36e-11	0.797521	0.21	0.32	5.64e-07	4	IFFO2
3.31e-11	0.647524	0.285	0.443	7.91e-07	4	RICTOR
3.7e-11	0.629291	0.303	0.47	8.84e-07	4	VOPP1
4.1e-11	0.388751	0.62	0.791	9.8e-07	4	CARD11
4.6e-11	0.561611	0.234	0.349	1.1e-06	4	CAMKMT
4.88e-11	0.729683	0.218	0.329	1.17e-06	4	SHLD2
5.11e-11	0.748714	0.215	0.325	1.22e-06	4	WWP2
5.82e-11	0.820093	0.216	0.327	1.39e-06	4	MLLT6
6.08e-11	0.873966	0.206	0.314	1.45e-06	4	MALT1
6.5e-11	0.864832	0.203	0.307	1.55e-06	4	LLGL2
9.89e-11	0.871626	0.214	0.327	2.36e-06	4	UNC13D
9.91e-11	0.706468	0.253	0.385	2.37e-06	4	RBM33
1.06e-10	0.522877	0.312	0.482	2.53e-06	4	GSK3B
1.09e-10	0.373679	0.424	0.687	2.6e-06	4	GNB1
2.19e-10	0.84939	0.212	0.32	5.24e-06	4	TBCD
2.71e-10	0.575951	0.352	0.552	6.46e-06	4	TNFAIP8
2.88e-10	0.685325	0.29	0.442	6.87e-06	4	GOLGB1
2.88e-10	0.661243	0.244	0.368	6.88e-06	4	GALNT10
3.48e-10	0.55353	0.349	0.546	8.32e-06	4	NIBAN1
3.82e-10	0.738617	0.273	0.417	9.13e-06	4	RC3H1
3.92e-10	0.787189	0.267	0.411	9.37e-06	4	GTF2I
3.98e-10	0.302606	0.382	0.559	9.51e-06	4	TSC22D3
5.16e-10	0.889154	0.237	0.362	1.23e-05	4	AP3D1
6.39e-10	0.471284	0.393	0.623	1.53e-05	4	N4BP2L2
7.8e-10	0.612375	0.252	0.373	1.86e-05	4	GRK5
8.54e-10	0.364017	0.4	0.614	2.04e-05	4	ZEB1
1.03e-09	0.525105	0.362	0.559	2.45e-05	4	SSH2
1.04e-09	0.993407	0.381	0.437	2.5e-05	4	LDLRAD4
1.21e-09	0.684938	0.254	0.383	2.88e-05	4	MRTFA
1.31e-09	0.714701	0.295	0.453	3.13e-05	4	TRAF1
1.45e-09	1.29219	0.331	0.369	3.46e-05	4	PPP6R2
1.51e-09	0.684048	0.217	0.319	3.62e-05	4	ATG7
1.79e-09	0.385631	0.633	0.836	4.28e-05	4	SKAP1
2.17e-09	1.25943	0.316	0.341	5.17e-05	4	GDPD5
2.41e-09	0.65779	0.528	0.675	5.75e-05	4	PBXIP1
2.43e-09	0.598344	0.3	0.455	5.8e-05	4	TCF12
2.44e-09	0.511966	0.28	0.413	5.83e-05	4	DLEU2
2.95e-09	1.35293	0.33	0.371	7.04e-05	4	EHBP1L1
3.19e-09	0.674439	0.263	0.394	7.62e-05	4	CREBBP
3.61e-09	0.603285	0.27	0.398	8.63e-05	4	ARHGAP35
3.91e-09	0.713061	0.285	0.431	9.33e-05	4	NUP210
4.92e-09	1.37933	0.3	0.326	0.00011741	4	ABR
5.02e-09	0.712209	0.236	0.348	0.000119937	4	FLNB
5.52e-09	1.04772	0.443	0.574	0.000131739	4	ZAP70
5.53e-09	0.704157	0.287	0.437	0.000132049	4	CDK13
7.18e-09	0.7388	0.239	0.353	0.000171425	4	PRDM2
9.77e-09	0.736887	0.253	0.377	0.000233454	4	MECP2
1.03e-08	0.404468	0.371	0.562	0.000245201	4	OSBPL3
1.22e-08	0.859105	0.236	0.352	0.000290915	4	ZFC3H1
1.35e-08	0.978361	0.259	0.396	0.000322953	4	SPSB3
1.62e-08	1.07932	0.437	0.56	0.000387823	4	SMG1
1.73e-08	0.735136	0.53	0.725	0.000414375	4	FMNL1
1.79e-08	0.443806	0.411	0.651	0.000427356	4	USP15
2.48e-08	0.455409	0.419	0.661	0.000591695	4	ARHGAP30
2.94e-08	0.802771	0.349	0.521	0.000701429	4	NFKBIA
3.59e-08	0.397559	0.424	0.651	0.000858507	4	SYNE1
4.52e-08	0.742247	0.212	0.305	0.00108055	4	RFX7
5.11e-08	1.19523	0.339	0.389	0.00122112	4	MYO5A
5.33e-08	0.335939	0.425	0.633	0.00127366	4	GRAMD1B
5.55e-08	0.361827	0.392	0.588	0.00132583	4	KLF12
5.78e-08	0.558448	0.581	0.795	0.00138032	4	SON
7.14e-08	0.631748	0.332	0.502	0.0017048	4	CDC25B
9.81e-08	0.789132	0.253	0.374	0.00234376	4	UBE2H
1.04e-07	0.349219	0.691	0.876	0.00247574	4	MYH9
1.07e-07	0.804698	0.213	0.308	0.00256301	4	WDR70
1.18e-07	0.601293	0.351	0.539	0.00281002	4	KDM2A
1.39e-07	0.81659	0.446	0.566	0.00333056	4	PPP3CA
1.53e-07	1.02677	0.347	0.391	0.00365492	4	PDE4D
1.69e-07	0.681849	0.318	0.477	0.00403047	4	MARK3
1.92e-07	0.700356	0.264	0.385	0.00457524	4	RNF38
2.13e-07	1.03753	0.21	0.309	0.00508148	4	LPCAT4
2.18e-07	0.466173	0.39	0.6	0.00521243	4	BIRC6
2.37e-07	1.11955	0.399	0.502	0.00565416	4	ANKRD13D
2.96e-07	0.716464	0.303	0.448	0.00705852	4	PACS1
3.1e-07	0.810535	0.255	0.374	0.00740444	4	ADCY7
3.51e-07	0.729722	0.277	0.409	0.00837308	4	TMEM65
4.01e-07	0.926329	0.271	0.406	0.00956794	4	DNAJB6
4.17e-07	0.491833	0.33	0.482	0.00995536	4	TGFBR3
4.17e-07	0.652322	0.245	0.348	0.00995709	4	ZNF407
4.18e-07	0.614619	0.37	0.572	0.00998869	4	TGOLN2
4.44e-07	0.571044	0.337	0.505	0.0105984	4	HERC4
5.64e-07	0.66141	0.309	0.456	0.0134723	4	NLRC5
6.2e-07	0.626627	0.302	0.447	0.0148058	4	UTY
6.64e-07	0.923679	0.41	0.512	0.0158598	4	TNRC6B
7.12e-07	0.470975	0.415	0.651	0.0170037	4	NCOR1
7.61e-07	0.76328	0.257	0.375	0.0181698	4	GAB3
9.3e-07	0.87337	0.445	0.579	0.0222115	4	CASP8
1.17e-06	0.382485	0.436	0.66	0.027859	4	DOCK10
1.37e-06	1.22065	0.346	0.394	0.0327195	4	AC020916.1
1.48e-06	0.769911	0.331	0.508	0.0352802	4	TRABD
1.82e-06	1.09783	0.219	0.32	0.0434739	4	AP1G2
1.84e-06	1.12949	0.308	0.335	0.043846	4	TNFAIP3
1.85e-06	0.722067	0.267	0.385	0.044235	4	BICRAL
1.91e-06	0.52061	0.307	0.442	0.0456089	4	ARL15
2.13e-06	0.921791	0.413	0.52	0.0507931	4	MYO9B
2.51e-06	0.820708	0.247	0.356	0.0599432	4	CSNK1G1
2.92e-06	0.594374	0.528	0.703	0.0696757	4	FOXN3
5.18e-06	0.867926	0.255	0.367	0.123714	4	NFATC2IP
5.93e-06	1.05379	0.231	0.335	0.141697	4	CDK5RAP3
7.16e-06	0.486518	0.389	0.587	0.171028	4	STAG1
7.24e-06	0.659437	0.338	0.504	0.172871	4	SRPK2
7.28e-06	0.703313	0.501	0.681	0.173959	4	FAM107B
8.67e-06	1.13872	0.24	0.349	0.20703	4	FLT3LG
9.51e-06	0.511388	0.377	0.56	0.227079	4	PRKCB
1.03e-05	0.894478	0.41	0.509	0.246035	4	ANKRD28
1.08e-05	1.01607	0.389	0.489	0.259096	4	RPS6KA3
1.1e-05	0.847347	0.227	0.32	0.263916	4	TMEM131L
1.17e-05	0.589226	0.373	0.565	0.278605	4	ARHGAP25
1.24e-05	0.735548	0.3	0.44	0.29692	4	WDFY2
1.34e-05	1.0426	0.359	0.433	0.320336	4	KIAA1109
1.52e-05	0.963422	0.284	0.421	0.36205	4	TMEM259
1.6e-05	0.656646	0.286	0.404	0.381825	4	BTBD9
1.87e-05	0.767364	0.303	0.445	0.4462	4	KCNAB2
2.25e-05	0.515364	0.357	0.522	0.536361	4	EXOC4
2.63e-05	0.845256	0.232	0.325	0.627978	4	ZMYND8
2.99e-05	0.935877	0.247	0.356	0.713577	4	RANBP9
3.88e-05	0.986372	0.437	0.587	0.927251	4	TMC6
3.96e-05	1.06052	0.238	0.34	0.944785	4	IL12RB1
5.08e-05	0.993203	0.217	0.302	1	4	CDK12
5.36e-05	0.877828	0.262	0.373	1	4	GAK
6.15e-05	0.787543	0.43	0.543	1	4	SMAD3
7.12e-05	0.8185	0.241	0.335	1	4	RALGAPA1
7.85e-05	1.23622	0.284	0.319	1	4	KDM5B
9.58e-05	1.03718	0.346	0.412	1	4	DIAPH2
0.000111452	0.419659	0.428	0.643	1	4	DOCK2
0.000112476	1.3048	0.328	0.396	1	4	RNF166
0.000126803	0.645913	0.346	0.511	1	4	ATF7IP
0.000127429	0.889857	0.246	0.345	1	4	HECTD4
0.000139031	0.388628	0.438	0.665	1	4	ARID4B
0.000147872	0.700563	0.378	0.573	1	4	ADAM8
0.000155481	0.396017	0.457	0.7	1	4	DDX17
0.000175094	0.862248	0.225	0.308	1	4	ZNF609
0.000206559	1.0174	0.371	0.462	1	4	NLRC3
0.000221077	0.465437	0.44	0.669	1	4	TNFRSF1B
0.000287006	0.325331	0.604	0.806	1	4	PRKCH
0.000377999	0.506584	0.541	0.748	1	4	ATP2B4
0.000398498	0.900391	0.237	0.328	1	4	TENT2
0.00041328	0.674889	0.468	0.626	1	4	KANSL1
0.000437415	0.685506	0.486	0.669	1	4	TAB2
0.000491925	0.966749	0.419	0.55	1	4	RALGDS
0.000603056	0.664586	0.328	0.468	1	4	CEP85L
0.000644794	0.383459	0.489	0.742	1	4	CFLAR
0.000768813	0.578284	0.379	0.56	1	4	GLS
0.000802966	0.709134	0.382	0.579	1	4	GRK2
0.000819572	0.526262	0.603	0.81	1	4	ADGRE5
0.00113961	0.845867	0.305	0.435	1	4	SYNJ2
0.00130906	0.42318	0.457	0.696	1	4	KMT2E
0.0014046	0.511585	0.395	0.574	1	4	ARID1B
0.00154075	1.00292	0.354	0.439	1	4	ATP9B
0.00157919	0.85748	0.245	0.333	1	4	TMEM181
0.00198136	0.974182	0.226	0.305	1	4	RNF157
0.0020354	0.895216	0.346	0.514	1	4	FBXW5
0.00204247	0.549329	0.397	0.585	1	4	PHTF2
0.00206365	0.816271	0.252	0.341	1	4	RAPGEF2
0.00228655	0.778606	0.287	0.397	1	4	KDM4C
0.00232488	0.710676	0.255	0.341	1	4	RFX3
0.00238265	0.765352	0.435	0.544	1	4	BCL2
0.00260258	0.66077	0.273	0.363	1	4	MAML2
0.00282281	0.790474	0.274	0.375	1	4	PLEKHA5
0.00286656	0.665912	0.391	0.583	1	4	BPTF
0.00342971	0.698243	0.384	0.563	1	4	PIK3CD
0.00364088	0.400038	0.562	0.777	1	4	CDC42SE2
0.00414072	0.779681	0.31	0.436	1	4	ANKRD36
0.0042803	0.754825	0.341	0.494	1	4	ADAM10
0.00533092	0.509431	0.413	0.613	1	4	ESYT2
0.00536067	1.00659	0.368	0.469	1	4	DENND4C
0.00625616	0.908332	0.294	0.406	1	4	PPP1R15A
0.00630587	0.798171	0.34	0.489	1	4	ATP2A3
0.00675153	0.757765	0.338	0.482	1	4	ZNF292
0.00732822	0.958385	0.395	0.504	1	4	TAGAP
0.00811489	0.760923	0.32	0.445	1	4	FARS2
0.00977673	0.931825	0.336	0.476	1	4	SLC38A2
0.00982079	0.545189	0.499	0.662	1	4	IL10RA
0	2.32798	0.592	0.116	0	6	COL5A3
0	2.54267	0.569	0.115	0	6	PTPN13
0	2.58736	0.538	0.106	0	6	AL136456.1
0	1.39422	0.505	0.1	0	6	TRBV5-6
0	2.13041	0.617	0.212	0	6	PTPRM
0	2.02174	0.525	0.126	0	6	LTK
0	2.27534	0.466	0.133	0	6	AQP3
0	1.65902	0.783	0.453	0	6	SPOCK2
0	2.28256	0.4	0.086	0	6	RORC
0	2.01207	0.473	0.187	0	6	ARHGEF12
0	1.40099	0.694	0.412	0	6	RUNX2
0	2.77382	0.309	0.051	0	6	ADAM12
0	1.5185	0.709	0.455	0	6	RORA
0	2.04288	0.374	0.121	0	6	MCF2L2
0	1.98634	0.383	0.132	0	6	FRMD4A
0	2.52596	0.312	0.076	0	6	CCR6
0	1.12932	0.826	0.618	0	6	CD6
0	1.39798	0.959	0.845	0	6	LTB
0	0.90298	0.961	0.872	0	6	FLNA
3.7e-278	1.35483	0.66	0.429	8.84e-274	6	SSBP3
2.1e-248	1.47263	0.622	0.412	5.01e-244	6	FURIN
7.61e-241	1.34262	0.552	0.31	1.82e-236	6	TNFRSF25
7.07e-239	1.35717	0.486	0.231	1.69e-234	6	FRY
1.93e-237	1.45368	0.578	0.354	4.61e-233	6	LINC00299
2.13e-232	1.22136	0.541	0.276	5.08e-228	6	PTPRG
1.32e-231	1.46401	0.338	0.125	3.15e-227	6	PTGDS
5.09e-225	1.58031	0.463	0.235	1.22e-220	6	MSC-AS1
7.26e-205	0.66715	0.915	0.87	1.73e-200	6	LRRFIP1
7.43e-190	1.27938	0.566	0.369	1.77e-185	6	TNIK
8e-187	1.62128	0.382	0.184	1.91e-182	6	RARG
3.46e-184	1.47412	0.405	0.202	8.26e-180	6	PRR5
5.2e-171	0.709777	0.829	0.739	1.24e-166	6	PLEC
6.32e-171	0.572804	0.884	0.848	1.51e-166	6	MYO1F
1.78e-164	0.671081	0.953	0.809	4.26e-160	6	S100A6
3.19e-163	0.979309	0.621	0.434	7.62e-159	6	SLCO3A1
5.65e-158	1.30418	0.452	0.263	1.35e-153	6	BCR
5.58e-155	1.31508	0.485	0.309	1.33e-150	6	CERK
1.89e-144	1.09623	0.581	0.415	4.52e-140	6	CAMK1D
4.53e-143	0.934021	0.647	0.508	1.08e-138	6	SYTL1
1.57e-140	0.604486	0.869	0.764	3.76e-136	6	TRBC2
4.14e-139	0.400997	0.987	0.997	9.89e-135	6	MT-CO2
1.39e-131	0.864224	0.589	0.408	3.32e-127	6	RAP1GAP2
7.57e-128	0.952962	0.62	0.496	1.81e-123	6	KAT2B
1.76e-126	0.766522	0.727	0.629	4.2e-122	6	CDC14A
2.17e-121	1.25389	0.405	0.244	5.18e-117	6	MAP3K4
6.16e-120	0.683272	0.795	0.717	1.47e-115	6	TLE5
2.43e-118	0.584082	0.827	0.801	5.8e-114	6	ANKRD12
6.17e-118	0.766403	0.721	0.662	1.47e-113	6	FAM107B
2.13e-117	0.520898	0.889	0.898	5.08e-113	6	NEAT1
2.71e-117	0.907518	0.627	0.51	6.47e-113	6	SPIDR
6.49e-117	0.648067	0.802	0.735	1.55e-112	6	TGFB1
2.1e-116	1.14579	0.353	0.188	5.02e-112	6	ANK3
1.32e-115	0.930817	0.541	0.387	3.15e-111	6	RASGRP2
2.48e-115	1.04116	0.531	0.385	5.92e-111	6	TBXAS1
1.56e-114	1.28151	0.4	0.248	3.72e-110	6	PDE4DIP
1.31e-113	0.959929	0.648	0.566	3.13e-109	6	C4orf48
8.06e-110	1.26891	0.447	0.306	1.92e-105	6	KDM5B
1.05e-107	0.339849	0.984	0.998	2.51e-103	6	MALAT1
1.06e-107	1.19945	0.421	0.269	2.53e-103	6	NTRK2
5.8e-104	0.755108	0.647	0.542	1.38e-99	6	CORO7
4.9e-103	0.796377	0.694	0.647	1.17e-98	6	TNFRSF1B
1.71e-102	0.306975	0.989	0.997	4.09e-98	6	MT-CO1
2.43e-102	0.376881	0.983	0.975	5.8e-98	6	AHNAK
1.75e-99	0.552212	0.779	0.752	4.17e-95	6	EML4
8.73e-99	1.3397	0.338	0.2	2.08e-94	6	ARNTL
4.21e-98	0.704587	0.629	0.51	1e-93	6	PRKCA
9.52e-96	0.652368	0.732	0.658	2.27e-91	6	PBXIP1
2.06e-94	0.887186	0.562	0.448	4.93e-90	6	ADARB1
2.5e-94	1.03237	0.383	0.234	5.97e-90	6	MB21D2
3.05e-90	0.920025	0.532	0.415	7.29e-86	6	CD5
8.2e-90	1.22604	0.325	0.189	1.96e-85	6	MGAT5
4.38e-89	0.472316	0.837	0.833	1.05e-84	6	CELF2
4.55e-89	0.718828	0.637	0.528	1.09e-84	6	BCL2
1.21e-88	0.309884	0.986	0.995	2.9e-84	6	MT-CO3
5.26e-88	0.504817	0.795	0.775	1.26e-83	6	FNBP1
3.5e-85	1.00973	0.303	0.167	8.35e-81	6	TNFRSF11A
2.87e-84	0.76328	0.609	0.535	6.84e-80	6	FLI1
7.99e-84	0.820757	0.574	0.466	1.91e-79	6	HPGD
1.49e-83	1.2252	0.321	0.193	3.56e-79	6	CAPN15
3.66e-83	0.452049	0.844	0.817	8.75e-79	6	THEMIS
1.07e-82	0.32941	0.961	0.977	2.55e-78	6	MT-ATP8
1.99e-81	0.417422	0.982	0.911	4.76e-77	6	TMSB10
2.69e-81	0.763707	0.634	0.569	6.44e-77	6	GPRIN3
1.22e-80	0.93415	0.508	0.403	2.91e-76	6	NPDC1
5.11e-79	0.685175	0.596	0.427	1.22e-74	6	CRIP2
9.97e-79	0.543094	0.757	0.724	2.38e-74	6	MYO1G
1.58e-77	0.956456	0.454	0.338	3.77e-73	6	VCL
4.46e-77	0.629726	0.705	0.686	1.06e-72	6	SPTAN1
5.25e-77	1.06435	0.413	0.293	1.25e-72	6	RARA
1.84e-76	0.966833	0.449	0.326	4.39e-72	6	AGPAT4
4.36e-76	0.540115	0.739	0.716	1.04e-71	6	BCL11B
6.85e-74	1.03974	0.394	0.275	1.64e-69	6	FOXO1
5.66e-72	0.907564	0.456	0.342	1.35e-67	6	ERN1
7.05e-72	0.938628	0.415	0.295	1.68e-67	6	PLCG1
4.67e-71	1.09867	0.361	0.242	1.12e-66	6	EXOC6B
4.57e-70	0.366772	0.854	0.858	1.09e-65	6	ARHGAP15
1.98e-69	0.315237	0.976	0.905	4.72e-65	6	CRIP1
3.55e-69	1.06828	0.381	0.261	8.49e-65	6	FUT7
7.45e-69	0.904511	0.476	0.377	1.78e-64	6	MYO5A
1.43e-67	0.551725	0.72	0.708	3.41e-63	6	FMNL1
7.62e-65	0.60832	0.64	0.597	1.82e-60	6	DNM2
2.07e-64	1.0659	0.372	0.268	4.95e-60	6	ELK3
5.34e-64	1.03305	0.336	0.222	1.28e-59	6	PPP2R2B
8.13e-63	0.40378	0.871	0.86	1.94e-58	6	MYH9
1.08e-62	0.31168	0.885	0.892	2.58e-58	6	IKZF1
1.6e-61	0.752829	0.482	0.38	3.82e-57	6	PDE4D
1.68e-61	0.519675	0.68	0.628	4.02e-57	6	SOS1
9.22e-61	0.765235	0.529	0.445	2.2e-56	6	PIK3R5
1.29e-60	0.93819	0.414	0.317	3.07e-56	6	MKNK1
2.24e-58	0.986638	0.451	0.368	5.35e-54	6	PFKL
5.61e-58	0.762192	0.54	0.476	1.34e-53	6	RPS6KA3
1.6e-56	1.09259	0.337	0.236	3.83e-52	6	TTC39C
8.51e-54	0.38486	0.78	0.783	2.03e-49	6	STK10
2.45e-52	0.559192	0.583	0.521	5.86e-48	6	NBEAL2
1.43e-51	0.916994	0.435	0.357	3.41e-47	6	CTSH
2.63e-51	0.396026	0.802	0.683	6.28e-47	6	KLF2
9.32e-51	0.891556	0.472	0.41	2.23e-46	6	CCNH
1.53e-50	0.999959	0.388	0.303	3.67e-46	6	REV3L
1.9e-50	0.454232	0.692	0.664	4.54e-46	6	LRBA
7.67e-50	0.581825	0.626	0.617	1.83e-45	6	STK24
2.03e-49	0.513852	0.674	0.658	4.84e-45	6	GLG1
3.36e-49	0.308475	0.885	0.907	8.02e-45	6	RNF213
2.31e-48	0.369293	0.813	0.809	5.51e-44	6	ETS1
7.65e-48	0.940518	0.468	0.419	1.83e-43	6	CMTM6
2.04e-46	0.470619	0.674	0.561	4.87e-42	6	LMNA
4.7e-46	0.747029	0.477	0.413	1.12e-41	6	MPRIP
1.44e-45	0.577584	0.569	0.515	3.43e-41	6	TBC1D22A
2.26e-45	0.982908	0.349	0.261	5.4e-41	6	CD300A
4.01e-45	0.741911	0.464	0.391	9.59e-41	6	PHF21A
2.16e-43	0.692354	0.417	0.326	5.15e-39	6	ADCY9
3.52e-43	0.944883	0.396	0.327	8.42e-39	6	IL12RB1
1.27e-42	1.02722	0.336	0.257	3.03e-38	6	FRMD4B
3.82e-42	0.586363	0.577	0.54	9.12e-38	6	JMJD1C
3.21e-41	1.0296	0.314	0.231	7.68e-37	6	E2F2
1.5e-40	0.527371	0.633	0.601	3.57e-36	6	TPM4
1.86e-40	0.746829	0.45	0.388	4.44e-36	6	SH3BP5
1.91e-40	0.539308	0.575	0.544	4.57e-36	6	STIM1
5.69e-40	0.671068	0.358	0.268	1.36e-35	6	ABCA7
1.99e-39	0.662532	0.459	0.392	4.75e-35	6	FAM53B
3.24e-39	0.919535	0.315	0.232	7.73e-35	6	ULK4
4.29e-37	0.796669	0.444	0.396	1.02e-32	6	GTF2I
8.06e-37	0.613676	0.531	0.498	1.92e-32	6	TRG-AS1
7.93e-36	0.555312	0.553	0.53	1.89e-31	6	TMC8
1.23e-35	0.940082	0.332	0.264	2.94e-31	6	CLINT1
2.55e-35	0.504141	0.648	0.602	6.1e-31	6	LIME1
1.21e-34	0.75116	0.422	0.363	2.89e-30	6	EHBP1L1
1.28e-34	0.402577	0.737	0.686	3.06e-30	6	PKM
1.76e-34	0.315574	0.765	0.783	4.2e-30	6	MACF1
1.04e-33	0.499696	0.623	0.598	2.49e-29	6	ITGB7
1.17e-33	0.34421	0.715	0.732	2.79e-29	6	ATP2B4
1.44e-32	0.421129	0.682	0.654	3.43e-28	6	SELPLG
1.73e-32	0.470907	0.597	0.586	4.14e-28	6	AAK1
3.02e-32	0.430522	0.647	0.648	7.21e-28	6	IQGAP2
4.04e-32	0.453318	0.646	0.654	9.65e-28	6	TAB2
3.41e-31	0.894408	0.313	0.245	8.16e-27	6	ODF2L
3.73e-31	0.62572	0.437	0.381	8.92e-27	6	CCDC88B
4.66e-31	0.486636	0.621	0.595	1.11e-26	6	S1PR4
1.52e-30	0.726357	0.463	0.424	3.63e-26	6	VSIR
4.4e-29	0.589938	0.491	0.458	1.05e-24	6	DENND4C
4.46e-29	0.75912	0.377	0.319	1.07e-24	6	ABR
5.48e-28	0.550205	0.532	0.527	1.31e-23	6	RBMS1
5.99e-28	0.648463	0.395	0.334	1.43e-23	6	FLNB
6.06e-28	0.352013	0.641	0.643	1.45e-23	6	PREX1
7.3e-28	0.808095	0.359	0.3	1.74e-23	6	BIRC3
1.61e-27	0.347538	0.731	0.755	3.85e-23	6	ACTN4
3.19e-27	0.784535	0.353	0.295	7.61e-23	6	RNF157
4.26e-27	0.508656	0.523	0.5	1.02e-22	6	INPP4A
9.86e-27	0.667848	0.4	0.35	2.36e-22	6	MAP3K5
1.22e-26	0.380548	0.761	0.767	2.92e-22	6	JUND
1.43e-26	0.499679	0.476	0.429	3.43e-22	6	LDLRAD4
1.87e-26	0.30739	0.854	0.805	4.47e-22	6	CYBA
6.39e-26	0.32082	0.812	0.792	1.53e-21	6	RPL13A
7.08e-26	0.517833	0.518	0.485	1.69e-21	6	CDC25B
4.97e-25	0.820334	0.376	0.337	1.19e-20	6	FLT3LG
5.09e-25	0.508808	0.539	0.536	1.22e-20	6	TNFAIP8
6.36e-25	0.696202	0.387	0.34	1.52e-20	6	AFF1
6.81e-25	0.805421	0.363	0.318	1.63e-20	6	CEP57
8.97e-25	0.678403	0.42	0.388	2.14e-20	6	RNF166
1.31e-24	0.781513	0.367	0.323	3.12e-20	6	CD28
1.32e-24	0.408942	0.551	0.532	3.15e-20	6	ZFAND3
2.3e-24	0.537494	0.502	0.479	5.5e-20	6	NFAT5
3.59e-24	0.394766	0.578	0.569	8.57e-20	6	PHTF2
7.95e-24	0.466556	0.52	0.501	1.9e-19	6	ZFYVE28
8.52e-24	0.627973	0.376	0.321	2.03e-19	6	SERINC5
1.3e-23	0.631053	0.468	0.456	3.12e-19	6	CYFIP2
1.59e-23	0.356619	0.547	0.518	3.79e-19	6	MSI2
2.57e-23	0.42253	0.602	0.619	6.15e-19	6	ARHGAP45
4.38e-23	0.40779	0.583	0.577	1.05e-18	6	P2RY8
5.29e-23	0.311943	0.653	0.648	1.26e-18	6	IL10RA
5.37e-23	0.457459	0.537	0.529	1.28e-18	6	NIBAN1
6.94e-23	0.449707	0.576	0.575	1.66e-18	6	STK38
7.39e-23	0.831277	0.356	0.316	1.77e-18	6	LPGAT1
7.45e-23	0.409529	0.574	0.571	1.78e-18	6	TBC1D5
2.72e-22	0.589555	0.506	0.5	6.5e-18	6	FBXW5
3.7e-22	0.520199	0.491	0.473	8.83e-18	6	PCSK7
7.33e-22	0.475165	0.486	0.46	1.75e-17	6	ETV6
5.14e-21	0.318932	0.615	0.609	1.23e-16	6	RAPGEF1
2.81e-20	0.519751	0.487	0.476	6.72e-16	6	ATP2A3
3.58e-20	0.478593	0.489	0.478	8.55e-16	6	DOCK11
3.94e-20	0.672472	0.378	0.345	9.41e-16	6	RANBP9
6.64e-20	0.742073	0.378	0.35	1.59e-15	6	AP3D1
7.03e-20	0.480705	0.454	0.429	1.68e-15	6	DIP2A
9.88e-20	0.588799	0.445	0.423	2.36e-15	6	SYNJ2
1e-19	0.576153	0.364	0.316	2.39e-15	6	CMIP
1.24e-19	0.713002	0.327	0.282	2.96e-15	6	MGAT4A
9.17e-19	0.373775	0.602	0.587	2.19e-14	6	MYADM
9.84e-19	0.396226	0.56	0.556	2.35e-14	6	PPP3CA
1.41e-18	0.681831	0.372	0.329	3.37e-14	6	TNFAIP3
1.83e-18	0.688572	0.338	0.299	4.38e-14	6	ARHGEF7
3.36e-18	0.64014	0.396	0.369	8.02e-14	6	TGFBR1
7.02e-18	0.691068	0.308	0.262	1.68e-13	6	ATF7IP2
7.51e-18	0.43106	0.558	0.576	1.79e-13	6	TMC6
1.49e-17	0.41284	0.507	0.501	3.55e-13	6	ANKRD28
1.65e-17	0.924781	0.311	0.281	3.94e-13	6	TMEM167A
1.83e-17	0.40369	0.583	0.611	4.38e-13	6	SF1
2.15e-17	0.657486	0.382	0.359	5.13e-13	6	SLC38A10
2.15e-17	0.637379	0.353	0.318	5.13e-13	6	TENT2
6.04e-17	0.541253	0.324	0.275	1.44e-12	6	MIAT
6.56e-17	0.569859	0.44	0.425	1.57e-12	6	KIAA1109
8.66e-17	0.521762	0.42	0.396	2.07e-12	6	TMEM65
1.2e-16	0.350817	0.55	0.548	2.87e-12	6	SIK3
2.61e-16	0.456312	0.475	0.465	6.23e-12	6	STAT5B
2.78e-16	0.955722	0.303	0.273	6.63e-12	6	ATOX1
1.84e-15	0.362138	0.57	0.597	4.39e-11	6	OGDH
4.64e-15	0.482047	0.306	0.261	1.11e-10	6	HDAC4
7.97e-15	0.338897	0.527	0.517	1.9e-10	6	SETBP1
1.01e-14	0.322676	0.647	0.678	2.41e-10	6	SPN
1.1e-14	0.471305	0.511	0.53	2.63e-10	6	PTPN4
1.11e-14	0.590758	0.351	0.319	2.65e-10	6	ATXN7L1
1.17e-14	0.774239	0.323	0.299	2.78e-10	6	LPCAT4
2.16e-14	0.355296	0.508	0.503	5.15e-10	6	TNRC6B
2.55e-14	0.737269	0.323	0.297	6.08e-10	6	FAM126A
2.57e-14	0.589117	0.377	0.357	6.13e-10	6	ZMIZ1
4.27e-14	0.721467	0.33	0.306	1.02e-09	6	NMRK1
8.36e-14	0.51672	0.361	0.332	2e-09	6	RASSF3
1.44e-13	0.549619	0.385	0.364	3.45e-09	6	PPP6R2
1.59e-13	0.354628	0.5	0.494	3.81e-09	6	TAGAP
2.68e-13	0.442717	0.423	0.406	6.4e-09	6	DIAPH2
2.97e-13	0.44881	0.45	0.451	7.08e-09	6	MOB3A
4.73e-13	0.514597	0.415	0.408	1.13e-08	6	USP3
6.32e-13	0.423475	0.447	0.426	1.51e-08	6	FP671120.4
1.67e-12	0.620036	0.317	0.291	3.98e-08	6	UBAP1
1.91e-12	0.534239	0.391	0.379	4.55e-08	6	SREBF2
2.5e-12	0.401624	0.457	0.454	5.97e-08	6	NLRC3
4.75e-12	0.548767	0.417	0.409	1.13e-07	6	MAST4
8.38e-12	0.606899	0.303	0.274	2e-07	6	NDRG1
9.47e-12	0.422955	0.445	0.445	2.26e-07	6	FGD3
1.24e-11	0.518656	0.393	0.383	2.96e-07	6	IL4R
1.74e-11	0.371485	0.524	0.549	4.16e-07	6	JAK3
2.42e-11	0.602495	0.314	0.289	5.79e-07	6	TP53I13
2.62e-11	0.369274	0.537	0.566	6.26e-07	6	ZAP70
2.76e-11	0.360365	0.447	0.426	6.58e-07	6	SORL1
3.18e-11	0.369379	0.429	0.409	7.59e-07	6	XYLT1
3.53e-11	0.322506	0.517	0.525	8.44e-07	6	KMT2C
5.71e-11	0.525657	0.391	0.386	1.36e-06	6	HELZ
6.64e-11	0.539328	0.318	0.293	1.59e-06	6	HECA
8.67e-11	0.410382	0.438	0.431	2.07e-06	6	NLRP1
1.37e-10	0.499342	0.392	0.388	3.26e-06	6	PPP3CB
2.33e-10	0.406157	0.48	0.498	5.57e-06	6	KLF13
2.72e-10	0.520189	0.333	0.31	6.5e-06	6	TMEM131L
3.04e-10	0.451061	0.467	0.483	7.26e-06	6	ADAM10
3.37e-10	0.610276	0.362	0.358	8.04e-06	6	GDI1
7.73e-10	0.362596	0.497	0.512	1.85e-05	6	MYO9B
7.73e-10	0.514371	0.34	0.32	1.85e-05	6	RPTOR
8.86e-10	0.586297	0.32	0.304	2.12e-05	6	MALT1
9.39e-10	0.581679	0.32	0.301	2.24e-05	6	TRRAP
1.53e-09	0.418736	0.431	0.432	3.65e-05	6	ATP9B
2.17e-09	0.458628	0.37	0.357	5.19e-05	6	GALNT10
2.22e-09	0.409884	0.435	0.434	5.31e-05	6	FARS2
4.7e-09	0.575068	0.331	0.319	0.000112324	6	SHLD2
1.66e-08	0.501	0.347	0.332	0.000396679	6	RAPGEF2
8.98e-08	0.618726	0.3	0.286	0.00214507	6	AC079793.1
9.56e-08	0.430448	0.387	0.381	0.00228225	6	AFDN
9.89e-08	0.526156	0.384	0.394	0.00236271	6	KIF21B
1.5e-07	0.406472	0.455	0.481	0.00359313	6	UBE2K
2.24e-07	0.400628	0.368	0.365	0.00534098	6	GAB3
2.76e-07	0.635004	0.314	0.31	0.00658028	6	UBE2Q2
3.2e-07	0.392536	0.467	0.496	0.00763216	6	ANKRD13D
3.59e-07	0.430595	0.364	0.364	0.00857741	6	UBE2H
5.72e-07	0.437636	0.419	0.429	0.0136596	6	WDFY2
9.73e-07	0.36479	0.4	0.404	0.0232498	6	MED13L
1.82e-06	0.581543	0.372	0.374	0.0434197	6	NSMCE2
1.94e-06	0.339268	0.577	0.586	0.046354	6	TXN
2.18e-06	0.529862	0.406	0.438	0.0521585	6	ESYT1
2.35e-06	0.390589	0.434	0.456	0.0560786	6	ADK
2.9e-06	0.565352	0.375	0.396	0.0693704	6	DNAJB6
3.44e-06	0.3679	0.382	0.381	0.0821129	6	TRAF3
3.6e-06	0.327963	0.507	0.558	0.0859315	6	ACAP2
4e-06	0.434675	0.345	0.347	0.0955117	6	CRYBG1
4.15e-06	0.309146	0.564	0.597	0.0991674	6	ANXA5
4.36e-06	0.310785	0.463	0.484	0.10414	6	PRKY
4.84e-06	0.458649	0.329	0.325	0.115677	6	ECE1
4.97e-06	0.446474	0.313	0.301	0.118598	6	ZNF609
5.25e-06	0.613674	0.303	0.303	0.125341	6	C1GALT1
5.43e-06	0.359225	0.368	0.367	0.129725	6	PLEKHA5
5.51e-06	0.446409	0.323	0.317	0.131566	6	MLLT6
5.96e-06	0.423657	0.433	0.461	0.142284	6	SEPTIN6
7.33e-06	0.345505	0.444	0.472	0.175163	6	ZNF292
7.46e-06	0.328606	0.402	0.404	0.17828	6	KIAA0319L
1.67e-05	0.333219	0.326	0.31	0.399841	6	TRAV9-2
1.97e-05	0.707885	0.345	0.368	0.46966	6	TRAPPC5
2.34e-05	0.330401	0.496	0.539	0.55905	6	YWHAH
2.55e-05	0.357668	0.413	0.428	0.609498	6	IQSEC1
2.92e-05	0.423887	0.307	0.299	0.696384	6	SKI
2.98e-05	0.391941	0.301	0.292	0.712238	6	CHD9
3.95e-05	0.51703	0.319	0.321	0.943501	6	PTPN9
5.25e-05	0.434406	0.385	0.391	1	6	AC020916.1
6.22e-05	0.387289	0.386	0.4	1	6	ABCC1
8.6e-05	0.689879	0.315	0.332	1	6	ISG15
9.36e-05	0.423663	0.372	0.384	1	6	CREBBP
0.000102447	0.488777	0.337	0.343	1	6	ZZEF1
0.000107617	0.416559	0.309	0.307	1	6	IL17RA
0.000129845	0.365397	0.435	0.46	1	6	TRADD
0.000146961	0.404509	0.303	0.297	1	6	RFX7
0.000158784	0.410992	0.324	0.326	1	6	TMEM181
0.000163369	0.339724	0.425	0.454	1	6	GOLGA4
0.000170411	0.510224	0.355	0.372	1	6	MKNK2
0.000188635	0.321398	0.38	0.39	1	6	PIEZO1
0.000311163	0.340938	0.411	0.433	1	6	SIPA1L1
0.000369221	0.349475	0.399	0.4	1	6	DUSP1
0.000942155	0.538741	0.308	0.316	1	6	MIIP
0.00103324	0.324863	0.44	0.481	1	6	RBL2
0.00131668	0.39111	0.357	0.374	1	6	SYNE3
0.00139536	0.366243	0.405	0.44	1	6	LFNG
0.00146638	0.421083	0.321	0.326	1	6	GBP5
0.00152257	0.388501	0.429	0.474	1	6	CDV3
0.00219102	0.411611	0.344	0.367	1	6	RNF10
0.00287569	0.313304	0.328	0.335	1	6	ARHGAP10
0.00335409	0.47542	0.35	0.379	1	6	CDC73
0.00393827	0.300826	0.281	0.355	1	6	ETFB
0.00466817	0.42733	0.349	0.375	1	6	MAP2K1
0.00505688	0.37126	0.368	0.393	1	6	INTS6
0.00507672	0.334986	0.286	0.359	1	6	RALBP1
0.00773071	0.315207	0.249	0.311	1	6	UHMK1
0.00790182	0.360921	0.353	0.374	1	6	MRTFA
0.00848277	0.559872	0.29	0.305	1	6	CCDC69
0.00924168	0.373739	0.342	0.36	1	6	TFRC
0.00928976	0.319398	0.417	0.459	1	6	VOPP1
0	5.24018	0.984	0.064	0	7	TRBV5-6
0	3.43242	0.822	0.106	0	7	AQP3
0	3.03592	0.93	0.263	0	7	TRAV9-2
0	3.80105	0.646	0.044	0	7	KLRB1
0	3.99403	0.606	0.025	0	7	TRAV20
0	2.10703	0.646	0.067	0	7	RORC
0	1.52626	0.678	0.108	0	7	PTPN13
0	1.03759	0.662	0.111	0	7	COL5A3
0	2.06525	0.859	0.324	0	7	CTSH
0	1.94499	0.754	0.232	0	7	FUT7
0	1.53035	0.956	0.44	0	7	SPOCK2
0	2.11774	0.559	0.055	0	7	IL4I1
0	0.913796	0.613	0.12	0	7	LTK
0	1.39544	0.879	0.389	0	7	CD5
0	1.14754	0.589	0.102	0	7	AL136456.1
0	2.36941	0.544	0.059	0	7	CCR6
0	2.3139	0.597	0.114	0	7	CEBPD
0	1.77216	0.905	0.441	0	7	HPGD
0	1.20139	0.778	0.316	0	7	TIMP1
0	1.55863	0.749	0.289	0	7	SYNGR2
0	2.39467	0.554	0.106	0	7	LST1
0	2.14223	0.617	0.17	0	7	MOSPD3
0	1.42738	0.917	0.471	0	7	LGALS3
0	1.52736	0.915	0.471	0	7	PRDX1
0	2.27826	0.553	0.112	0	7	FKBP11
0	1.34161	0.783	0.342	0	7	RHOC
0	0.665914	0.651	0.211	0	7	PTPRM
0	0.856711	0.877	0.442	0	7	RORA
0	0.555699	0.73	0.296	0	7	TNFRSF25
0	0.868182	0.813	0.38	0	7	NPDC1
0	1.41665	0.822	0.392	0	7	CMTM6
0	1.31056	0.746	0.318	0	7	PRDX2
0	1.54306	0.684	0.258	0	7	PNP
0	1.10986	0.604	0.178	0	7	ARHGEF12
0	1.2607	0.937	0.513	0	7	IFITM1
0	1.1597	0.808	0.385	0	7	CCDC107
0	1.10778	0.832	0.409	0	7	NDUFB9
0	1.43634	0.633	0.211	0	7	WDR86-AS1
0	1.93465	0.554	0.132	0	7	KDSR
0	0.92074	0.937	0.516	0	7	ELOB
0	1.05897	0.849	0.428	0	7	TRADD
0	1.13123	0.607	0.186	0	7	PRR5
0	0.98899	0.9	0.485	0	7	NDUFB2
0	0.940889	0.861	0.449	0	7	COX7A2
0	0.930223	0.842	0.433	0	7	NDUFA4
0	1.12889	0.888	0.481	0	7	ORAI1
0	0.956681	0.926	0.521	0	7	BTF3
0	1.28346	0.926	0.522	0	7	GNB2
0	1.22474	0.917	0.513	0	7	PLP2
0	1.39599	0.657	0.254	0	7	TMEM167A
0	0.954028	0.812	0.412	0	7	DBI
0	0.938142	0.821	0.421	0	7	NDUFB10
0	1.12417	0.738	0.338	0	7	TRAPPC5
0	0.823325	0.874	0.475	0	7	COX5B
0	1.01131	0.792	0.393	0	7	GSTP1
0	1.4849	0.77	0.372	0	7	DUSP1
0	1.16926	0.726	0.328	0	7	NDUFB4
0	1.17584	0.719	0.321	0	7	RNH1
0	0.953848	0.866	0.468	0	7	RABAC1
0	1.05577	0.741	0.344	0	7	NDUFA12
0	1.02798	0.807	0.411	0	7	ATP6V1G1
0	0.91167	0.795	0.399	0	7	FURIN
0	1.1519	0.735	0.339	0	7	PRDX5
0	1.59337	0.953	0.557	0	7	TXN
0	1.92053	0.44	0.045	0	7	IL17RE
0	1.06412	0.634	0.239	0	7	CD300A
0	1.02712	0.707	0.312	0	7	FLT3LG
0	1.3028	0.641	0.247	0	7	ATOX1
0	0.741792	0.882	0.49	0	7	SYTL1
0	0.936118	0.952	0.56	0	7	ATP5MG
0	1.06052	0.87	0.479	0	7	LDHA
0	2.44648	0.462	0.072	0	7	MSC
0	1.27583	0.668	0.278	0	7	CD151
0	0.885196	0.782	0.393	0	7	C9orf16
0	1.00143	0.921	0.532	0	7	TSPO
0	0.989191	0.785	0.399	0	7	VSIR
0	0.837703	0.908	0.523	0	7	COX6C
0	0.847837	0.925	0.541	0	7	PSME1
0	0.854707	0.867	0.484	0	7	EIF3K
0	1.08476	0.74	0.358	0	7	CAPG
0	1.22934	0.951	0.57	0	7	S1PR4
0	1.51411	0.564	0.183	0	7	GPR65
0	1.06649	0.724	0.343	0	7	PLSCR3
0	0.960355	0.934	0.556	0	7	UBB
0	1.03129	0.719	0.343	0	7	ATP5PO
0	0.968127	0.806	0.431	0	7	PYCARD
0	1.60178	0.477	0.106	0	7	TSPAN15
0	1.25523	0.554	0.185	0	7	HOXB2
0	0.905756	0.821	0.452	0	7	NDUFB8
0	2.74481	0.399	0.031	0	7	PKIG
0	1.1787	0.934	0.569	0	7	ANXA5
0	1.19018	0.58	0.216	0	7	STN1
0	0.876919	0.868	0.509	0	7	ATP5F1B
0	1.23698	0.841	0.482	0	7	NFKBIA
0	0.845369	0.955	0.597	0	7	COX4I1
0	1.06722	0.896	0.54	0	7	OSTF1
0	2.25076	0.405	0.05	0	7	PI16
0	0.819084	0.963	0.608	0	7	CD6
0	0.860435	0.526	0.173	0	7	RARG
0	1.48499	0.589	0.236	0	7	CITED2
0	1.16474	0.593	0.241	0	7	PLEKHF1
0	1.13593	0.633	0.282	0	7	PEBP1
0	1.01636	0.72	0.369	0	7	RGS19
0	1.16316	0.552	0.204	0	7	REEP3
0	0.958202	0.958	0.61	0	7	ARPC3
0	0.891974	0.914	0.567	0	7	PCBP1
0	0.829572	0.921	0.574	0	7	PPP1CA
0	0.890832	0.95	0.603	0	7	FTL
0	0.862567	0.921	0.575	0	7	ITGB7
0	0.843158	0.973	0.627	0	7	RPS13
0	1.18673	0.477	0.134	0	7	RORA-AS1
0	0.863116	0.913	0.571	0	7	LAT
0	1.74355	0.409	0.068	0	7	JMY
0	0.901743	0.962	0.622	0	7	OAZ1
0	1.09536	0.964	0.625	0	7	ITM2B
0	1.1501	0.564	0.227	0	7	SLC16A3
0	1.01287	0.575	0.239	0	7	FRMD4B
0	1.18353	0.533	0.199	0	7	ADA
0	1.86343	0.496	0.162	0	7	OSM
0	0.79539	0.459	0.126	0	7	FRMD4A
0	0.769411	0.958	0.625	0	7	MYL12B
0	0.847666	0.962	0.629	0	7	GMFG
0	0.935809	0.963	0.633	0	7	SELPLG
0	0.836604	0.97	0.642	0	7	PPDPF
0	2.19462	0.374	0.047	0	7	TMPRSS3
0	1.77024	0.427	0.1	0	7	PEPD
0	1.59389	0.494	0.168	0	7	GLRX
0	0.96224	0.966	0.642	0	7	RNASEK
0	1.13668	0.518	0.197	0	7	ARL3
0	0.767567	0.979	0.658	0	7	RPL29
0	1.29749	0.519	0.2	0	7	PIM2
0	2.58341	0.347	0.03	0	7	HSD11B1
0	0.766718	0.975	0.658	0	7	RPS4X
0	0.94043	0.974	0.66	0	7	RACK1
0	1.0614	0.432	0.121	0	7	CRY1
0	1.00265	0.985	0.683	0	7	FTH1
0	0.991721	0.972	0.67	0	7	KLF2
0	0.980403	0.986	0.685	0	7	H3F3A
0	1.01475	0.966	0.669	0	7	PKM
0	1.95977	0.371	0.075	0	7	ICAM2
0	1.06876	0.409	0.117	0	7	MREG
0	1.0487	0.981	0.691	0	7	RPLP0
0	2.3539	0.334	0.046	0	7	ASCL2
0	1.12494	0.992	0.706	0	7	MYL12A
0	0.798734	0.968	0.682	0	7	RAC2
0	1.02757	0.939	0.657	0	7	UCP2
0	0.760952	0.989	0.709	0	7	PPIA
0	1.53307	0.367	0.088	0	7	GAS2L1
0	1.26765	0.328	0.05	0	7	ADAM12
0	0.735177	0.992	0.716	0	7	FAU
0	1.28807	0.38	0.107	0	7	ZNRF1
0	1.01847	0.986	0.714	0	7	ARHGDIB
0	1.02633	0.975	0.703	0	7	TLE5
0	1.40976	0.315	0.044	0	7	AUTS2
0	0.73046	0.981	0.71	0	7	RPL18A
0	0.828934	0.993	0.732	0	7	RPS15A
0	0.781942	0.995	0.736	0	7	S100A11
0	0.840124	0.981	0.723	0	7	FXYD5
0	0.944699	0.979	0.721	0	7	TGFB1
0	1.50974	0.336	0.083	0	7	SNAI3
0	1.4553	0.328	0.076	0	7	UAP1
0	0.811562	0.991	0.739	0	7	GAPDH
0	1.91572	0.317	0.065	0	7	LDOC1
0	0.826412	0.993	0.743	0	7	RPL11
0	1.9086	0.304	0.054	0	7	IL3RA
0	1.07055	0.982	0.734	0	7	ANXA2
0	2.08516	0.315	0.068	0	7	BATF3
0	1.37862	0.327	0.081	0	7	LINC01814
0	0.790395	0.996	0.754	0	7	TRBC2
0	0.888171	0.986	0.749	0	7	ARPC1B
0	0.823923	0.993	0.76	0	7	RPL10
0	0.875215	0.988	0.756	0	7	TAGLN2
0	1.56297	0.302	0.072	0	7	SLC4A10
0	0.788726	0.994	0.771	0	7	RPL28
0	0.948469	0.994	0.772	0	7	LGALS1
0	0.758916	0.996	0.775	0	7	CFL1
0	0.732562	0.986	0.782	0	7	UBC
0	1.0211	0.998	0.794	0	7	CYBA
0	1.2841	0.997	0.794	0	7	CALM1
0	1.72594	0.999	0.806	0	7	S100A6
0	0.753526	0.995	0.804	0	7	EMP3
0	0.882841	0.996	0.806	0	7	S100A10
0	0.686484	0.997	0.811	0	7	MYL6
0	0.759438	0.997	0.82	0	7	EIF1
0	1.05433	0.999	0.828	0	7	SH3BGRL3
0	0.763933	0.995	0.828	0	7	CORO1A
0	0.670134	0.996	0.832	0	7	RPL13
0	0.999122	0.997	0.84	0	7	TPT1
0	1.79761	0.998	0.842	0	7	LTB
0	0.918908	0.995	0.84	0	7	VIM
0	0.987954	0.999	0.846	0	7	CD52
0	0.825694	0.999	0.856	0	7	PFN1
0	1.54783	1	0.871	0	7	S100A4
0	0.820925	0.999	0.874	0	7	EEF1A1
0	0.962314	0.999	0.903	0	7	CRIP1
0	0.902103	0.999	0.91	0	7	TMSB10
0	0.567248	0.999	0.918	0	7	HLA-C
0	0.678943	0.999	0.919	0	7	IL32
0	0.897111	1	0.922	0	7	ACTB
0	0.931452	1	0.947	0	7	B2M
7.04e-307	0.928357	0.738	0.352	1.68e-302	7	COX7B
1.46e-305	0.954947	0.808	0.46	3.48e-301	7	NDUFV2
1.02e-302	0.844965	0.943	0.644	2.44e-298	7	SLC9A3R1
6.53e-302	0.733934	0.573	0.232	1.56e-297	7	MAP3K4
1.77e-301	1.20961	0.551	0.228	4.22e-297	7	CDKN1A
1.84e-300	0.760209	0.952	0.608	4.39e-296	7	HINT1
1.34e-299	1.51145	0.359	0.112	3.2e-295	7	C3orf14
3.15e-299	0.952837	0.678	0.313	7.52e-295	7	ISG20
4.15e-299	0.729767	0.971	0.661	9.9e-295	7	CLIC1
7.25e-299	0.767337	0.922	0.539	1.73e-294	7	UQCR11
1.68e-298	0.949276	0.602	0.253	4.01e-294	7	S1PR1
9.22e-298	0.852295	0.811	0.41	2.2e-293	7	CRIP2
7.38e-297	0.692411	0.985	0.737	1.76e-292	7	RPS23
1.36e-296	0.976291	0.68	0.323	3.25e-292	7	ATP6V1F
4.57e-296	0.885209	0.781	0.402	1.09e-291	7	PSMB3
2.44e-295	0.979958	0.596	0.252	5.82e-291	7	GPR183
2.46e-295	0.77557	0.915	0.52	5.87e-291	7	COX6A1
1.53e-294	0.831636	0.847	0.478	3.66e-290	7	TBCB
2.11e-294	1.1867	0.493	0.193	5.04e-290	7	FDX1
2.78e-294	1.0981	0.498	0.195	6.63e-290	7	SOCS2
8.2e-294	0.870843	0.602	0.26	1.96e-289	7	R3HDM4
3.76e-293	0.698766	0.916	0.545	8.97e-289	7	C4orf48
9.16e-293	0.847491	0.891	0.544	2.19e-288	7	PNRC1
4.17e-292	1.09992	0.603	0.275	9.95e-288	7	EIF3I
7.96e-292	0.935424	0.754	0.394	1.9e-287	7	ABRACL
9.2e-292	0.711714	0.974	0.679	2.2e-287	7	RPL8
1.08e-291	0.887206	0.781	0.404	2.58e-287	7	APRT
3.18e-291	0.690889	0.988	0.694	7.6e-287	7	RPL32
3.17e-287	0.859646	0.803	0.414	7.58e-283	7	ATP5MF
1.31e-286	0.820011	0.854	0.479	3.12e-282	7	CSTB
5.47e-286	0.670798	0.984	0.707	1.31e-281	7	SERF2
1.66e-283	0.637944	0.998	0.84	3.96e-279	7	RPLP1
5.16e-283	1.09445	0.549	0.233	1.23e-278	7	VAMP5
2.62e-282	0.802983	0.871	0.51	6.27e-278	7	YWHAH
2.95e-280	0.77876	0.871	0.479	7.05e-276	7	COX8A
1.76e-279	0.733413	0.942	0.631	4.21e-275	7	SUB1
1.04e-277	1.00805	0.593	0.266	2.49e-273	7	LAMTOR2
2.39e-276	0.88261	0.731	0.385	5.7e-272	7	RHOF
2.46e-276	0.704846	0.961	0.639	5.88e-272	7	RPL15
2.54e-276	0.846524	0.612	0.277	6.06e-272	7	LPCAT4
1.45e-274	0.857716	0.756	0.402	3.47e-270	7	TWF2
2.69e-272	0.75462	0.904	0.523	6.43e-268	7	RPS5
5.73e-272	0.790412	0.829	0.45	1.37e-267	7	NDUFA11
1.27e-271	0.728493	0.914	0.53	3.04e-267	7	GABARAP
3.39e-271	0.793755	0.893	0.577	8.09e-267	7	C12orf75
1.14e-270	0.629169	0.988	0.769	2.72e-266	7	IL2RG
2.08e-269	0.85016	0.752	0.384	4.98e-265	7	PSMB6
6.19e-269	0.79943	0.846	0.49	1.48e-264	7	SKP1
7.34e-269	0.678603	0.971	0.658	1.75e-264	7	RPS16
1.11e-268	0.826438	0.832	0.472	2.64e-264	7	C17orf49
7.77e-268	0.698893	0.96	0.624	1.86e-263	7	UBA52
7.55e-267	0.652408	0.982	0.709	1.8e-262	7	RPL18
1e-266	0.798945	0.81	0.442	2.39e-262	7	HIGD2A
1.47e-266	0.85322	0.754	0.402	3.52e-262	7	RHOG
1.8e-266	0.994127	0.73	0.398	4.31e-262	7	CISH
2.03e-266	0.711217	0.958	0.657	4.84e-262	7	RPSA
1.09e-264	0.632733	0.992	0.724	2.61e-260	7	RPL30
1.36e-264	0.786092	0.934	0.657	3.24e-260	7	ENO1
1.03e-263	0.807377	0.766	0.386	2.47e-259	7	UQCR10
2.02e-263	0.756187	0.644	0.308	4.82e-259	7	IL12RB1
7.42e-263	0.820146	0.747	0.384	1.77e-258	7	CCDC167
9.34e-263	0.812394	0.801	0.446	2.23e-258	7	ERP29
3.67e-262	0.683152	0.96	0.638	8.77e-258	7	NACA
8.04e-262	0.733543	0.883	0.503	1.92e-257	7	COX6B1
8.36e-262	0.859948	0.74	0.388	2e-257	7	ATP5PD
1.21e-261	0.731479	0.834	0.461	2.88e-257	7	VAMP8
2.3e-261	0.755273	0.826	0.443	5.49e-257	7	NDUFB11
5.9e-261	0.716201	0.91	0.546	1.41e-256	7	CHCHD2
7.72e-261	0.623386	0.621	0.277	1.84e-256	7	RARA
2.99e-260	0.680917	0.948	0.595	7.13e-256	7	NDUFA13
5.73e-259	0.808496	0.646	0.306	1.37e-254	7	ISG15
2.5e-258	1.3983	0.367	0.129	5.98e-254	7	PDCL3
4.86e-258	0.627347	0.994	0.745	1.16e-253	7	RPS28
8.6e-258	0.814445	0.526	0.218	2.06e-253	7	TOB1
6.43e-257	1.24929	0.438	0.173	1.54e-252	7	MFSD5
1.68e-256	0.482559	0.756	0.371	4e-252	7	RASGRP2
1.35e-255	0.783213	0.819	0.448	3.21e-251	7	ATP5MC3
9.59e-255	0.838599	0.736	0.388	2.29e-250	7	PSMD8
1.08e-254	0.65529	0.952	0.677	2.59e-250	7	YWHAQ
2.11e-254	0.953862	0.555	0.25	5.04e-250	7	MFNG
4.96e-253	0.685539	0.932	0.576	1.19e-248	7	SRP14
2.99e-252	0.756292	0.845	0.483	7.14e-248	7	ATP6V0E1
3.94e-252	1.10087	0.43	0.166	9.42e-248	7	BAD
5.35e-252	0.71821	0.855	0.474	1.28e-247	7	NDUFA1
2.34e-251	0.615551	0.989	0.743	5.58e-247	7	RPL19
9.65e-250	1.07416	0.485	0.2	2.3e-245	7	CXCR4
5.85e-249	0.835115	0.653	0.31	1.4e-244	7	CDKN2D
1.75e-248	0.814494	0.795	0.447	4.18e-244	7	CAPNS1
2.46e-248	0.915223	0.672	0.338	5.87e-244	7	ALDOA
3.64e-248	0.76451	0.799	0.438	8.7e-244	7	IFITM3
8.72e-248	1.01189	0.498	0.213	2.08e-243	7	MRPL28
8.83e-247	1.0582	0.595	0.286	2.11e-242	7	AL133415.1
9.14e-247	0.701191	0.89	0.504	2.18e-242	7	OST4
1.15e-246	0.699995	0.92	0.572	2.74e-242	7	SUMO2
1.52e-246	0.838875	0.753	0.415	3.63e-242	7	ATP5PB
1.87e-246	0.726033	0.625	0.297	4.48e-242	7	CEP57
2.22e-246	0.686618	0.927	0.612	5.3e-242	7	GPSM3
4.88e-246	0.845676	0.656	0.32	1.17e-241	7	SF3B5
1.39e-245	1.37059	0.366	0.132	3.32e-241	7	NDUFA8
3.42e-245	0.825529	0.69	0.352	8.16e-241	7	SELENOW
1.2e-244	0.772674	0.764	0.398	2.86e-240	7	ATP5MD
4.01e-244	0.931675	0.572	0.267	9.58e-240	7	GDE1
2.1e-243	1.11304	0.346	0.116	5.01e-239	7	MAP1LC3A
3.73e-243	0.867759	0.685	0.349	8.91e-239	7	PSMA2
2.83e-242	0.842259	0.697	0.352	6.75e-238	7	NDUFA6
3.03e-241	0.684681	0.891	0.528	7.24e-237	7	PSMA7
5.21e-241	0.63377	0.981	0.737	1.24e-236	7	RPS2
1.14e-240	0.802146	0.73	0.385	2.72e-236	7	UFC1
7.11e-240	0.737217	0.861	0.513	1.7e-235	7	PSMB8
2.44e-238	0.727959	0.984	0.784	5.83e-234	7	ACTG1
3.29e-238	0.673463	0.944	0.606	7.86e-234	7	RPL5
1.09e-237	0.891962	0.686	0.362	2.6e-233	7	SIT1
1.33e-237	0.840577	0.588	0.27	3.18e-233	7	CLEC2B
2.1e-237	0.954128	0.321	0.104	5.01e-233	7	PERP
6.91e-237	0.789309	0.73	0.384	1.65e-232	7	SAP18
8.01e-237	0.881336	0.372	0.131	1.91e-232	7	ZC2HC1A
1.85e-236	0.735166	0.867	0.532	4.42e-232	7	EIF4A1
2.4e-236	0.833898	0.664	0.339	5.73e-232	7	CHMP2A
5.1e-236	0.686224	0.866	0.517	1.22e-231	7	COPE
1.55e-235	0.637693	0.959	0.634	3.71e-231	7	RPL36AL
2.43e-235	0.758145	0.769	0.415	5.81e-231	7	SEC61B
4.42e-235	0.777773	0.721	0.382	1.06e-230	7	RNASET2
5.99e-234	0.705755	0.876	0.516	1.43e-229	7	DYNLL1
9.65e-234	0.780555	0.755	0.418	2.3e-229	7	TAF10
2.02e-232	0.729784	0.734	0.389	4.83e-228	7	VPS28
2.77e-232	0.768339	0.789	0.444	6.62e-228	7	PSMB1
7.04e-232	0.577682	0.985	0.761	1.68e-227	7	H3F3B
1.26e-231	0.731853	0.785	0.43	3.01e-227	7	ARF5
3.69e-231	0.900589	0.557	0.261	8.81e-227	7	RAB18
4.93e-231	0.606106	0.981	0.663	1.18e-226	7	RPL35A
7.55e-231	0.818361	0.852	0.52	1.8e-226	7	TSC22D3
2.02e-230	0.57824	0.815	0.476	4.83e-226	7	FBXW5
2.59e-230	0.681866	0.823	0.451	6.2e-226	7	NME2
3.97e-230	0.677267	0.866	0.494	9.49e-226	7	SSR4
5.48e-230	0.486396	0.542	0.23	1.31e-225	7	MSC-AS1
9.66e-230	0.670912	0.869	0.492	2.31e-225	7	KRTCAP2
1.03e-229	0.668124	0.852	0.496	2.45e-225	7	ATP5F1D
1.16e-228	0.533142	0.361	0.122	2.77e-224	7	MCF2L2
1.37e-228	0.659057	0.901	0.54	3.28e-224	7	COX7C
5.76e-227	0.874686	0.597	0.288	1.38e-222	7	ZNHIT1
3.78e-226	0.59461	0.975	0.703	9.02e-222	7	RPL14
1.24e-225	0.893854	0.61	0.299	2.96e-221	7	CARD16
1.26e-225	0.938391	0.593	0.293	3e-221	7	GHITM
3.19e-225	0.738415	0.31	0.098	7.61e-221	7	CORO2A
7.29e-225	0.921012	0.562	0.269	1.74e-220	7	PPA1
1.34e-224	1.00782	0.344	0.121	3.2e-220	7	IFT57
1.84e-224	0.557427	0.989	0.726	4.38e-220	7	RPS14
1.09e-223	0.719899	0.86	0.523	2.61e-219	7	CD81
8.87e-223	0.713549	0.717	0.391	2.12e-218	7	CCNH
1.91e-222	0.813934	0.69	0.37	4.56e-218	7	SELENOT
3.73e-222	0.994068	0.315	0.105	8.91e-218	7	GNA15
5e-222	0.855675	0.586	0.281	1.19e-217	7	MRPL54
4.51e-221	0.645999	0.924	0.588	1.08e-216	7	RPL10A
9.57e-221	0.665218	0.754	0.409	2.29e-216	7	AURKAIP1
1.34e-220	0.951809	0.524	0.242	3.21e-216	7	GET3
1.62e-220	0.888413	0.621	0.317	3.87e-216	7	GABARAPL2
2.77e-220	0.916195	0.594	0.297	6.62e-216	7	RAB5IF
3.72e-220	1.4369	0.326	0.116	8.89e-216	7	OVCA2
6.54e-219	0.680187	0.624	0.304	1.56e-214	7	CD28
2.19e-218	0.71832	0.796	0.473	5.23e-214	7	REEP5
6.46e-218	0.662364	0.926	0.619	1.54e-213	7	RPL4
6.8e-218	0.618242	0.957	0.688	1.62e-213	7	HSP90AA1
9.83e-218	0.64512	0.53	0.239	2.35e-213	7	PDE4DIP
1.02e-217	0.554843	0.984	0.69	2.44e-213	7	RPL39
1.9e-217	0.690883	0.74	0.402	4.53e-213	7	NDUFB7
2.74e-217	1.03745	0.409	0.163	6.55e-213	7	TMEM147
4.59e-217	0.633339	0.899	0.583	1.1e-212	7	LIME1
6.84e-217	0.687851	0.782	0.441	1.63e-212	7	TMEM173
1.72e-216	0.782308	0.631	0.316	4.1e-212	7	ADRM1
4.78e-216	0.768373	0.667	0.342	1.14e-211	7	CIAO2B
1e-215	0.808425	0.691	0.372	2.4e-211	7	ATP5F1C
1.38e-215	1.0023	0.455	0.194	3.3e-211	7	DNPH1
1.9e-215	0.710157	0.784	0.446	4.55e-211	7	BCAP31
2.09e-215	0.578124	0.982	0.71	4.99e-211	7	RPS3A
3.67e-215	0.694875	0.588	0.286	8.76e-211	7	NMRK1
4.5e-214	1.08648	0.53	0.25	1.08e-209	7	AL138963.4
4.12e-213	0.621511	0.892	0.532	9.83e-209	7	EDF1
2.28e-212	0.890637	0.452	0.192	5.44e-208	7	CD55
3.92e-212	0.822516	0.614	0.311	9.37e-208	7	SUMO1
1.57e-211	0.781622	0.638	0.327	3.75e-207	7	NDUFS8
2.15e-211	0.512624	1	0.925	5.12e-207	7	TMSB4X
2.54e-211	0.778438	0.617	0.303	6.07e-207	7	GBP5
4.88e-211	0.656228	0.913	0.616	1.17e-206	7	EEF2
5.63e-211	0.736101	0.717	0.376	1.34e-206	7	NOP10
1.44e-210	0.653757	0.864	0.528	3.43e-206	7	UQCRB
1.81e-210	0.760056	0.737	0.409	4.32e-206	7	SRI
4.69e-210	0.893255	0.515	0.238	1.12e-205	7	MRPL34
1.16e-209	0.744272	0.62	0.31	2.77e-205	7	TNFAIP3
3.88e-209	0.555748	0.983	0.698	9.26e-205	7	RPS7
4.36e-209	0.565345	0.98	0.723	1.04e-204	7	RPS9
1.44e-208	0.695409	0.792	0.46	3.43e-204	7	PRR13
4.99e-208	0.631247	0.755	0.423	1.19e-203	7	OTUB1
1.24e-207	0.942455	0.527	0.248	2.97e-203	7	HSBP1
3.99e-207	1.00535	0.465	0.208	9.53e-203	7	ABI3
1e-206	0.708711	0.869	0.546	2.39e-202	7	LMNA
1.22e-206	0.599141	0.935	0.614	2.91e-202	7	RPL9
3.45e-206	0.594446	0.96	0.714	8.24e-202	7	LAPTM5
8.16e-206	0.669035	0.539	0.248	1.95e-201	7	CLINT1
1.04e-205	0.554307	0.98	0.704	2.49e-201	7	RPL7A
1.4e-205	0.818665	0.567	0.278	3.35e-201	7	MIEN1
2.52e-205	0.7107	0.672	0.357	6.01e-201	7	HEBP2
4.17e-205	1.07778	0.367	0.142	9.96e-201	7	FAM89B
1.08e-204	0.78558	0.642	0.341	2.58e-200	7	TEX264
1.22e-204	0.546588	0.98	0.716	2.92e-200	7	RPS8
4.62e-204	0.689077	0.763	0.426	1.1e-199	7	NEDD8
1.86e-203	0.528495	0.566	0.258	4.45e-199	7	NTRK2
2.84e-203	0.672952	0.807	0.462	6.79e-199	7	TRAPPC1
3.87e-203	0.785061	0.511	0.236	9.25e-199	7	MYD88
6.21e-203	0.735674	0.669	0.346	1.48e-198	7	C19orf53
1.12e-202	0.672292	0.732	0.4	2.68e-198	7	UBXN1
5.67e-202	0.687692	0.751	0.43	1.35e-197	7	UBALD2
1.1e-201	0.814034	0.566	0.273	2.64e-197	7	UXT
2.11e-201	0.540341	0.985	0.725	5.04e-197	7	RPS24
3.02e-201	0.86877	0.548	0.263	7.22e-197	7	SMDT1
6.84e-201	0.656597	0.815	0.468	1.63e-196	7	COX5A
1.05e-199	0.656256	0.838	0.513	2.51e-195	7	YBX1
1.64e-199	0.604889	0.654	0.353	3.91e-195	7	PFKL
4.61e-199	0.690454	0.767	0.453	1.1e-194	7	DOK2
1.16e-198	0.735837	0.639	0.332	2.77e-194	7	NDUFS7
1.89e-198	0.720231	0.669	0.359	4.52e-194	7	PSMC5
6.67e-198	0.727643	0.638	0.332	1.59e-193	7	SSNA1
8.79e-198	0.73629	0.687	0.372	2.1e-193	7	TALDO1
3.6e-197	0.815817	0.679	0.381	8.6e-193	7	PLIN2
9.72e-197	0.773223	0.596	0.3	2.32e-192	7	RNF181
6.65e-196	0.484546	0.992	0.772	1.59e-191	7	RPS15
9.02e-196	0.340946	0.419	0.159	2.15e-191	7	TNFRSF11A
1.26e-195	0.709287	0.666	0.36	3.01e-191	7	MAP1LC3B
1.07e-194	0.562316	0.956	0.637	2.56e-190	7	RPL24
2.09e-194	0.649184	0.811	0.495	4.99e-190	7	DAZAP2
3.78e-194	0.70458	0.676	0.362	9.03e-190	7	TXNL4A
6.74e-194	0.874784	0.511	0.244	1.61e-189	7	BUD31
2.66e-193	0.672614	0.713	0.403	6.34e-189	7	RAB11A
6.44e-193	0.687314	0.681	0.365	1.54e-188	7	ATP6V0B
7.47e-193	0.702548	0.652	0.341	1.78e-188	7	FIS1
9.37e-193	0.77716	0.612	0.32	2.24e-188	7	CCNDBP1
1.19e-192	0.645591	0.845	0.545	2.85e-188	7	ARF6
1.8e-192	0.684601	0.698	0.368	4.31e-188	7	ATP5PF
3.48e-192	0.689137	0.804	0.484	8.32e-188	7	EEF1G
1.48e-191	0.674996	0.704	0.373	3.53e-187	7	UQCRQ
2.5e-191	0.605826	0.677	0.364	5.98e-187	7	TYMP
3.23e-191	0.614822	0.901	0.608	7.71e-187	7	LIMD2
5.21e-191	0.853482	0.526	0.259	1.24e-186	7	CYCS
9.17e-191	0.54622	0.969	0.698	2.19e-186	7	RPL17
2.62e-190	0.66954	0.524	0.249	6.25e-186	7	GRK6
2.79e-190	0.540128	0.971	0.676	6.65e-186	7	RPS25
2.53e-189	0.745913	0.723	0.409	6.03e-185	7	PRELID1
2.01e-188	0.638901	0.792	0.46	4.79e-184	7	LDHB
3.29e-188	0.70314	0.702	0.39	7.86e-184	7	EIF3F
7.63e-188	0.726183	0.638	0.331	1.82e-183	7	NDUFB3
1.74e-187	0.586464	0.898	0.55	4.15e-183	7	ATP5MC2
2.49e-187	0.551017	0.914	0.548	5.94e-183	7	UBL5
4.85e-187	0.873435	0.543	0.272	1.16e-182	7	TMEM35B
1.74e-186	0.408015	0.704	0.372	4.15e-182	7	TBXAS1
2.41e-186	0.54816	0.638	0.336	5.75e-182	7	GDI1
4.74e-185	0.736469	0.644	0.346	1.13e-180	7	ECH1
1.33e-184	0.620725	0.771	0.44	3.19e-180	7	RBX1
1.4e-184	0.546701	0.758	0.414	3.34e-180	7	MGST3
5.83e-184	0.778354	0.571	0.293	1.39e-179	7	FDFT1
6.17e-184	0.871652	0.47	0.221	1.47e-179	7	COMMD3
2.38e-183	0.74472	0.552	0.276	5.69e-179	7	PSMD9
2.66e-183	0.663944	0.735	0.412	6.36e-179	7	BRK1
7.67e-183	0.506954	0.319	0.116	1.83e-178	7	MAPK11
8.94e-183	0.648927	0.734	0.427	2.13e-178	7	ZYX
1.13e-182	0.538955	0.933	0.608	2.71e-178	7	LY6E
1.99e-182	1.19148	0.338	0.136	4.75e-178	7	JAGN1
2.22e-182	0.699313	0.671	0.367	5.3e-178	7	EIF5A
1.72e-181	0.833981	0.507	0.248	4.11e-177	7	TSTA3
2.3e-181	0.567923	0.692	0.379	5.5e-177	7	SCAND1
1.88e-180	0.635958	0.583	0.3	4.5e-176	7	SH3BP1
2.24e-180	0.688783	0.703	0.399	5.35e-176	7	BZW1
2.43e-180	0.739546	0.595	0.304	5.81e-176	7	DCTN3
7.35e-180	0.640026	0.708	0.384	1.76e-175	7	SEC61G
1.42e-179	0.502106	0.685	0.37	3.39e-175	7	SH3BP5
4.51e-179	0.548198	0.956	0.672	1.08e-174	7	YWHAB
9.57e-179	0.459171	0.602	0.3	2.29e-174	7	CERK
4.15e-178	0.688108	0.64	0.34	9.91e-174	7	UQCRH
5.41e-178	0.785377	0.515	0.253	1.29e-173	7	NDUFA7
6.22e-178	0.495531	0.443	0.192	1.49e-173	7	ARNTL
8.6e-178	0.586472	0.833	0.501	2.05e-173	7	JPT1
9.88e-178	0.656124	0.688	0.387	2.36e-173	7	PSMA6
1.21e-177	0.719788	0.585	0.298	2.89e-173	7	NDUFAB1
2.05e-177	0.609897	0.743	0.433	4.89e-173	7	SH2D2A
4.7e-177	0.530079	0.722	0.414	1.12e-172	7	ZFAS1
6.86e-176	0.535686	0.817	0.47	1.64e-171	7	COMMD6
8.79e-176	0.704177	0.605	0.314	2.1e-171	7	PDCD5
1.04e-175	0.738512	0.57	0.29	2.48e-171	7	SF3B6
2.22e-175	0.603439	0.717	0.393	5.31e-171	7	NDUFS5
2.44e-175	0.727342	0.81	0.526	5.83e-171	7	JUNB
2.61e-175	0.609544	0.702	0.394	6.22e-171	7	DSTN
3.96e-175	0.657275	0.617	0.32	9.46e-171	7	NAA38
4.22e-175	0.687944	0.772	0.457	1.01e-170	7	RPS27L
4.42e-175	0.777263	0.54	0.272	1.06e-170	7	OCIAD2
8.43e-175	0.558893	0.889	0.587	2.01e-170	7	ARHGDIA
9.63e-175	0.657259	0.663	0.37	2.3e-170	7	ITGB1BP1
1.79e-174	0.612944	0.756	0.43	4.27e-170	7	EEF1B2
1.82e-174	0.659978	0.687	0.376	4.36e-170	7	POMP
2.96e-174	0.519686	0.964	0.71	7.08e-170	7	RPL3
3.05e-174	0.62826	0.811	0.496	7.28e-170	7	TMEM50A
1.94e-173	0.64837	0.667	0.375	4.62e-169	7	PPP4C
3.99e-173	0.65838	0.596	0.314	9.53e-169	7	NUDT5
5.7e-173	0.819272	0.502	0.244	1.36e-168	7	CISD3
5.99e-173	0.976212	0.355	0.146	1.43e-168	7	GTF2H5
1.23e-172	0.749667	0.563	0.29	2.94e-168	7	SEC11C
4.24e-171	0.552234	0.485	0.228	1.01e-166	7	RASSF7
7.86e-171	0.738419	0.541	0.279	1.88e-166	7	YIPF3
8.11e-171	0.624973	0.594	0.31	1.94e-166	7	PIN1
1.23e-170	0.531015	0.584	0.296	2.94e-166	7	KDM5B
1.45e-170	0.597735	0.81	0.503	3.47e-166	7	EID1
1.58e-170	0.648818	0.744	0.44	3.77e-166	7	SLC25A6
1.61e-170	0.54962	0.967	0.776	3.85e-166	7	ANXA1
3.03e-170	0.570929	0.672	0.376	7.23e-166	7	PPP1R15A
3.76e-170	0.550381	0.834	0.508	8.98e-166	7	MZT2B
8.08e-170	0.496665	0.833	0.51	1.93e-165	7	ARL6IP1
9.4e-170	0.927471	0.368	0.158	2.24e-165	7	EIF2B2
1.31e-169	0.495732	0.721	0.401	3.12e-165	7	MRPL41
2.08e-169	0.827079	0.495	0.245	4.97e-165	7	REXO2
4.69e-169	0.523673	0.828	0.49	1.12e-164	7	RAN
8.46e-169	0.556484	0.834	0.538	2.02e-164	7	CD47
1.06e-168	0.577456	0.718	0.406	2.52e-164	7	EIF3G
1.77e-168	0.566034	0.921	0.6	4.23e-164	7	PPIB
4.32e-168	0.817816	0.479	0.233	1.03e-163	7	FIBP
5.93e-168	0.464417	0.989	0.773	1.42e-163	7	RPS18
6.53e-168	0.446732	0.993	0.788	1.56e-163	7	RPS26
7.09e-168	0.824604	0.498	0.246	1.69e-163	7	NDUFAF3
1.09e-167	0.517113	0.949	0.671	2.61e-163	7	ARL6IP5
3.49e-167	0.579354	0.569	0.296	8.33e-163	7	MIIP
6.96e-167	0.441841	0.995	0.803	1.66e-162	7	RPS27A
2.12e-166	0.779573	0.505	0.254	5.06e-162	7	ADH5
1.49e-164	0.47439	0.981	0.71	3.55e-160	7	RPL36
1.55e-164	0.857186	0.415	0.19	3.71e-160	7	GYG1
2.43e-164	0.59816	0.866	0.584	5.8e-160	7	IER2
3.26e-164	0.566049	0.845	0.536	7.79e-160	7	ARPC5
1.04e-163	0.620316	0.649	0.356	2.48e-159	7	NDUFS6
1.11e-163	0.876758	0.413	0.189	2.65e-159	7	CUEDC2
2.26e-163	0.736664	0.519	0.263	5.4e-159	7	ARL4A
2.32e-163	0.482828	0.975	0.717	5.54e-159	7	RPL6
2.4e-163	0.876306	0.468	0.228	5.72e-159	7	EMC4
1.16e-162	0.85406	0.479	0.238	2.77e-158	7	SUMO3
1.44e-162	0.901182	0.609	0.341	3.43e-158	7	FOS
1.53e-162	0.548259	0.743	0.44	3.66e-158	7	ARRB2
4.94e-162	0.760566	0.523	0.268	1.18e-157	7	LAMTOR1
1.19e-161	0.577066	0.842	0.527	2.83e-157	7	SLC25A3
2.05e-161	0.907852	0.395	0.178	4.89e-157	7	TIMM17B
5.36e-161	0.580538	0.638	0.353	1.28e-156	7	STUB1
5.79e-161	0.721386	0.532	0.275	1.38e-156	7	POLR2E
8e-161	0.61865	0.67	0.37	1.91e-156	7	SLC25A5
8.97e-161	0.844831	0.397	0.179	2.14e-156	7	GOLGA7
9.39e-161	0.539632	0.711	0.424	2.24e-156	7	LPXN
1e-160	0.589735	0.609	0.329	2.4e-156	7	ETFB
5.32e-160	0.753755	0.493	0.243	1.27e-155	7	PSMC3
2.06e-159	0.694237	0.481	0.238	4.93e-155	7	PDLIM2
2.24e-159	0.472707	0.964	0.66	5.35e-155	7	RPL23A
1.1e-158	0.574041	0.386	0.168	2.64e-154	7	GRAMD1A
2.86e-158	0.773495	0.435	0.206	6.82e-154	7	DDA1
7.1e-158	0.54857	0.747	0.431	1.7e-153	7	CSNK2B
1.45e-157	0.738679	0.53	0.274	3.47e-153	7	CCT7
2.68e-157	0.646261	0.575	0.307	6.4e-153	7	CLTB
2.87e-157	0.539827	0.811	0.501	6.86e-153	7	PSMB10
3.98e-157	0.42584	0.377	0.159	9.51e-153	7	TSPAN32
4.4e-157	0.631158	0.4	0.179	1.05e-152	7	EHD4
6.62e-157	0.495362	0.957	0.716	1.58e-152	7	GSTK1
1.53e-156	0.780393	0.48	0.241	3.65e-152	7	EIF6
4.93e-156	0.341405	0.779	0.473	1.18e-151	7	TAGAP
5.29e-156	0.985803	0.364	0.16	1.26e-151	7	NPC2
8.75e-156	0.473145	0.842	0.551	2.09e-151	7	CIRBP
1.08e-155	0.553031	0.717	0.406	2.57e-151	7	TRMT112
1.24e-155	0.473288	0.767	0.474	2.96e-151	7	SAT1
1.61e-155	0.541374	0.803	0.476	3.85e-151	7	PARK7
1.67e-155	0.673652	0.532	0.277	3.98e-151	7	ATP6V0D1
2.45e-155	0.451037	0.994	0.785	5.85e-151	7	RPS12
5.99e-155	0.564337	0.309	0.12	1.43e-150	7	OGFRL1
6.5e-155	0.563032	0.69	0.39	1.55e-150	7	CTSB
1.86e-154	0.331117	0.661	0.369	4.45e-150	7	RNF166
1.93e-154	0.645745	0.577	0.306	4.61e-150	7	PHPT1
2.69e-154	0.636872	0.585	0.314	6.43e-150	7	ELOC
3.32e-154	0.877534	0.406	0.191	7.93e-150	7	PDHB
3.46e-154	0.529045	0.774	0.462	8.25e-150	7	SEM1
6.94e-154	0.681504	0.6	0.328	1.66e-149	7	RTRAF
8.08e-154	0.736576	0.525	0.276	1.93e-149	7	VDAC2
2.67e-153	0.745718	0.463	0.228	6.39e-149	7	EMD
5.65e-153	0.584516	0.608	0.333	1.35e-148	7	UQCRFS1
7.22e-153	0.837952	0.432	0.206	1.72e-148	7	PTRHD1
1e-152	0.476957	0.973	0.72	2.4e-148	7	RPS6
1.04e-152	0.830445	0.402	0.189	2.48e-148	7	PMVK
2.06e-152	0.426226	0.517	0.257	4.93e-148	7	ELK3
1.2e-151	0.672511	0.555	0.295	2.87e-147	7	ISCU
2.53e-151	0.55711	0.766	0.477	6.05e-147	7	CLDND1
4.91e-151	0.791317	0.44	0.215	1.17e-146	7	TRAPPC3
2.49e-150	0.648441	0.611	0.342	5.95e-146	7	MDH2
4.02e-150	0.445191	0.918	0.555	9.6e-146	7	MIF
6.35e-150	0.570791	0.601	0.329	1.52e-145	7	CDC42EP3
7.75e-150	0.832242	0.427	0.205	1.85e-145	7	HINT2
1.46e-149	0.580255	0.488	0.243	3.49e-145	7	HDGFL3
1.49e-149	0.503187	0.71	0.411	3.57e-145	7	TBCA
2.08e-149	0.797986	0.389	0.179	4.97e-145	7	SNAP29
2.73e-149	0.574453	0.789	0.491	6.51e-145	7	PGK1
8.98e-149	0.435419	0.961	0.749	2.14e-144	7	CAPZB
1.28e-148	0.496888	0.816	0.509	3.05e-144	7	FKBP8
2.27e-148	0.624795	0.579	0.311	5.42e-144	7	LAMTOR5
5.05e-148	0.580075	0.695	0.416	1.21e-143	7	ESYT1
9.22e-148	0.499112	0.626	0.349	2.2e-143	7	MXD4
1.1e-147	0.553116	0.809	0.501	2.62e-143	7	SSR2
1.22e-147	0.741067	0.469	0.236	2.92e-143	7	COPZ1
1.54e-147	0.592663	0.546	0.288	3.68e-143	7	UQCRC1
2.53e-147	0.539095	0.651	0.356	6.05e-143	7	ROMO1
5.39e-147	0.718166	0.466	0.233	1.29e-142	7	EMC6
6.38e-147	0.921386	0.301	0.124	1.52e-142	7	MAPK3
4.25e-146	0.568158	0.635	0.363	1.02e-141	7	CHURC1
5.72e-146	0.703883	0.475	0.241	1.37e-141	7	PRMT1
5.79e-146	0.779502	0.481	0.248	1.38e-141	7	APH1A
5.83e-146	0.41815	0.988	0.763	1.39e-141	7	RPL34
7.76e-146	0.628885	0.54	0.287	1.85e-141	7	PUF60
9.44e-146	0.576053	0.58	0.317	2.25e-141	7	SQOR
2.19e-145	0.426851	0.989	0.772	5.23e-141	7	RPS3
2.44e-145	0.543138	0.749	0.447	5.84e-141	7	BSG
2.56e-145	0.503127	0.747	0.433	6.12e-141	7	BLOC1S1
2.91e-145	0.48855	0.907	0.598	6.94e-141	7	TRIR
7.13e-145	0.758692	0.381	0.174	1.7e-140	7	2002-03-01
7.14e-145	0.545255	0.668	0.377	1.71e-140	7	MICOS10
1.29e-144	0.426504	0.979	0.709	3.08e-140	7	RPL26
1.57e-144	0.685006	0.458	0.228	3.74e-140	7	IDH3G
1.82e-144	0.609504	0.543	0.286	4.34e-140	7	TMEM219
2.11e-144	0.519923	0.62	0.336	5.04e-140	7	NDUFA2
6.67e-144	0.714231	0.442	0.216	1.59e-139	7	MPC2
8.14e-144	0.496315	0.575	0.309	1.95e-139	7	RHEB
9.23e-144	0.772074	0.409	0.195	2.21e-139	7	MRPS15
1.33e-143	0.6385	0.563	0.305	3.17e-139	7	SSBP1
2.39e-143	0.518086	0.812	0.525	5.71e-139	7	CCNI
3.16e-143	0.458792	0.933	0.608	7.54e-139	7	RPL27
4.38e-143	0.443082	0.636	0.35	1.05e-138	7	TUBB4B
6.15e-143	0.490929	0.918	0.646	1.47e-138	7	GNAI2
8.38e-143	0.551711	0.469	0.233	2e-138	7	SPTY2D1
3.2e-142	0.736852	0.482	0.248	7.63e-138	7	POLR2G
3.46e-142	0.647227	0.545	0.289	8.27e-138	7	GPX4
4.43e-142	0.504524	0.89	0.588	1.06e-137	7	CNBP
4.47e-142	0.560504	0.58	0.323	1.07e-137	7	ANXA7
5.46e-142	0.527631	0.697	0.406	1.3e-137	7	JTB
1.13e-141	0.553462	0.378	0.168	2.7e-137	7	NR1D2
1.35e-141	0.47002	0.966	0.743	3.21e-137	7	LSP1
2.23e-141	0.509425	0.746	0.466	5.33e-137	7	ARPC4
2.35e-141	0.408607	0.527	0.274	5.62e-137	7	RGS14
2.65e-141	0.698319	0.516	0.273	6.34e-137	7	UBE2L6
3.39e-141	0.541801	0.55	0.294	8.09e-137	7	METTL26
8.42e-141	0.630779	0.571	0.313	2.01e-136	7	RNF7
1.16e-140	0.641637	0.417	0.198	2.78e-136	7	TNFSF14
2.14e-140	0.305788	0.715	0.402	5.1e-136	7	H2AFZ
2.24e-140	0.551135	0.636	0.361	5.35e-136	7	SELENOK
2.51e-140	0.538633	0.625	0.349	6e-136	7	SNU13
3.84e-140	0.478749	0.484	0.244	9.18e-136	7	TPGS1
9.83e-140	0.567255	0.626	0.35	2.35e-135	7	TNFSF12
1.36e-139	0.494632	0.734	0.438	3.24e-135	7	ATP6V0C
1.42e-139	0.66518	0.34	0.149	3.39e-135	7	TMEM263
1.68e-139	0.729128	0.399	0.188	4.01e-135	7	CHCHD5
2.88e-139	0.729224	0.47	0.243	6.89e-135	7	MMADHC
4.02e-139	0.549758	0.84	0.568	9.59e-135	7	MYADM
8.37e-139	0.604012	0.579	0.323	2e-134	7	RAB5C
1.11e-138	0.406654	0.329	0.138	2.66e-134	7	PER1
1.19e-138	0.502552	0.694	0.418	2.84e-134	7	LFNG
1.58e-138	0.724793	0.441	0.218	3.78e-134	7	TIMM8B
1.95e-138	0.544855	0.746	0.482	4.66e-134	7	CD69
2.28e-138	0.579692	0.595	0.335	5.45e-134	7	PSMD7
3.15e-138	0.727229	0.437	0.219	7.53e-134	7	CLPP
3.7e-138	0.641992	0.548	0.299	8.85e-134	7	GTF3C6
7.42e-138	0.787727	0.409	0.198	1.77e-133	7	NDUFS3
9.63e-138	0.639567	0.548	0.298	2.3e-133	7	SNRPB2
9.67e-138	0.404701	0.641	0.365	2.31e-133	7	STXBP2
1.25e-137	0.527183	0.611	0.333	2.99e-133	7	IFI27L2
1.65e-137	0.824242	0.372	0.173	3.95e-133	7	GLO1
4.59e-137	0.540052	0.625	0.361	1.1e-132	7	CAPZA2
8.96e-137	0.606323	0.522	0.274	2.14e-132	7	COX14
3.23e-136	0.638461	0.492	0.253	7.71e-132	7	TXNDC17
3.52e-136	0.422877	0.489	0.251	8.4e-132	7	CAMTA1
8.84e-136	0.482125	0.672	0.389	2.11e-131	7	AIP
1.25e-135	0.438131	0.836	0.523	2.98e-131	7	DRAP1
1.33e-135	0.667284	0.456	0.231	3.19e-131	7	ACOT7
3.16e-135	0.466785	0.834	0.522	7.55e-131	7	NPM1
3.42e-135	0.493998	0.684	0.399	8.17e-131	7	C4orf3
3.45e-135	0.639849	0.424	0.208	8.24e-131	7	SURF1
5.19e-135	0.480624	0.791	0.483	1.24e-130	7	PGAM1
1.21e-134	0.572678	0.557	0.306	2.88e-130	7	RWDD1
1.21e-134	0.620202	0.496	0.259	2.89e-130	7	PSMC4
1.68e-134	0.52708	0.658	0.387	4e-130	7	SHISA5
2.08e-134	0.307904	1	0.961	4.96e-130	7	HLA-B
2.77e-134	0.704039	0.479	0.25	6.61e-130	7	CTSZ
3.63e-134	0.482909	0.535	0.285	8.67e-130	7	C1GALT1
9.2e-134	0.36611	0.911	0.648	2.2e-129	7	FAM107B
1.47e-133	0.45063	0.779	0.462	3.51e-129	7	ATP5IF1
2.38e-133	0.58001	0.411	0.2	5.69e-129	7	FBXL6
2.4e-133	0.484424	0.775	0.477	5.73e-129	7	TMEM59
3.84e-133	0.47242	0.456	0.231	9.18e-129	7	ACAA1
7.75e-133	0.488719	0.811	0.508	1.85e-128	7	ICAM3
1.03e-132	0.443867	0.823	0.513	2.46e-128	7	RPL7
1.34e-132	0.64244	0.513	0.277	3.21e-128	7	COX7A2L
1.52e-132	0.562233	0.575	0.321	3.62e-128	7	TUFM
3.48e-132	0.524299	0.648	0.373	8.32e-128	7	GTF3A
3.89e-132	0.508164	0.791	0.501	9.28e-128	7	PPP1R18
6.26e-132	0.583222	0.555	0.308	1.5e-127	7	CYB5R3
6.3e-132	0.504382	0.801	0.511	1.51e-127	7	ARF1
3.16e-131	0.874538	0.339	0.155	7.54e-127	7	ZNF511
5.46e-131	0.446422	0.754	0.44	1.3e-126	7	SNRPD2
5.63e-131	0.445115	0.878	0.57	1.34e-126	7	RPL22
6.04e-131	0.509644	0.573	0.325	1.44e-126	7	SHKBP1
6.23e-131	0.683577	0.421	0.211	1.49e-126	7	METTL9
7.23e-131	0.704366	0.339	0.152	1.73e-126	7	UNC119
7.46e-131	0.474285	0.627	0.349	1.78e-126	7	COPS9
1.07e-130	0.477493	0.786	0.477	2.55e-126	7	PSME2
1.26e-130	0.826489	0.381	0.183	3.02e-126	7	LSM10
1.41e-130	0.513233	0.629	0.366	3.37e-126	7	SELENOF
1.62e-130	0.796541	0.344	0.158	3.87e-126	7	GBP1
3.49e-130	0.523383	0.517	0.279	8.32e-126	7	HERPUD1
6.6e-130	0.610814	0.536	0.293	1.58e-125	7	MDH1
7.84e-130	0.424265	0.749	0.471	1.87e-125	7	MVP
9.14e-130	0.485327	0.589	0.334	2.18e-125	7	UBE2B
1.06e-129	0.817854	0.371	0.177	2.52e-125	7	MRPS12
1.15e-129	0.628409	0.507	0.272	2.75e-125	7	UFD1
2.08e-129	0.674043	0.51	0.274	4.97e-125	7	SUPT4H1
3.04e-129	0.767546	0.347	0.159	7.26e-125	7	MRPL36
3.8e-129	0.771725	0.43	0.22	9.08e-125	7	HSD17B10
4.02e-129	0.637679	0.492	0.26	9.6e-125	7	GTF2A2
4.2e-129	0.441234	0.438	0.218	1e-124	7	GADD45B
5.21e-129	0.52112	0.576	0.322	1.24e-124	7	G3BP1
9.43e-129	0.606365	0.51	0.274	2.25e-124	7	BCL7C
1.21e-128	0.435626	0.931	0.641	2.88e-124	7	IFITM2
3.55e-128	0.409971	0.987	0.758	8.47e-124	7	RPL37
5.13e-128	0.48488	0.753	0.462	1.22e-123	7	DAD1
1.2e-127	0.724167	0.432	0.22	2.85e-123	7	IER3IP1
3.37e-127	0.556355	0.615	0.362	8.04e-123	7	PPP2R1A
7.75e-127	0.656743	0.456	0.238	1.85e-122	7	SEC13
2.02e-126	0.520024	0.645	0.382	4.82e-122	7	UBE2N
2.35e-126	0.453757	0.749	0.45	5.62e-122	7	NDUFC2
2.57e-126	0.519218	0.399	0.193	6.14e-122	7	APOL3
4.27e-126	0.923006	0.314	0.14	1.02e-121	7	PRDX4
6.02e-126	0.777363	0.405	0.204	1.44e-121	7	AP1S1
6.87e-126	0.911164	0.356	0.17	1.64e-121	7	TOMM22
1.33e-125	0.484418	0.674	0.412	3.17e-121	7	FERMT3
2.07e-125	0.43517	0.721	0.415	4.95e-121	7	WDR83OS
2.33e-125	0.478436	0.696	0.432	5.57e-121	7	HNRNPUL1
2.49e-125	0.499734	0.479	0.25	5.94e-121	7	FOSB
2.63e-125	0.387868	0.638	0.376	6.27e-121	7	DNAJB6
4.19e-125	0.529831	0.36	0.166	1e-120	7	LINC02384
6.53e-125	0.407371	0.461	0.233	1.56e-120	7	ODF2L
7.99e-125	0.514847	0.513	0.28	1.91e-120	7	CNPPD1
1.51e-124	0.523878	0.498	0.267	3.61e-120	7	NDUFS2
1.8e-124	0.481476	0.861	0.588	4.31e-120	7	ZFP36
2.27e-124	0.3634	0.367	0.169	5.42e-120	7	ANO10
3.17e-124	0.588575	0.518	0.285	7.57e-120	7	VDAC3
3.25e-124	0.446526	0.771	0.479	7.77e-120	7	CIB1
4.24e-124	0.326451	0.712	0.43	1.01e-119	7	DPP7
5.08e-124	0.657391	0.445	0.23	1.21e-119	7	C18orf32
6.95e-124	0.575333	0.461	0.242	1.66e-119	7	ARL8A
6.95e-124	0.843669	0.333	0.156	1.66e-119	7	SLC10A3
7.73e-124	0.649466	0.475	0.254	1.85e-119	7	TSR3
9.52e-124	0.821116	0.33	0.152	2.27e-119	7	MTX1
9.77e-124	0.589075	0.574	0.328	2.33e-119	7	CCT6A
1.68e-123	0.419354	0.785	0.474	4.01e-119	7	POLR2L
1.93e-123	0.42947	0.964	0.728	4.62e-119	7	HSPA8
2.49e-123	0.637048	0.34	0.157	5.95e-119	7	WSB2
2.54e-123	0.572373	0.49	0.264	6.07e-119	7	COPS6
2.9e-123	0.610679	0.438	0.226	6.93e-119	7	SPAG7
3.67e-123	0.565802	0.527	0.293	8.76e-119	7	DDRGK1
5.06e-123	0.38931	0.984	0.791	1.21e-118	7	CD3E
5.65e-123	0.659498	0.433	0.223	1.35e-118	7	ETHE1
6.09e-123	0.557125	0.518	0.283	1.45e-118	7	POLR3GL
8.34e-123	0.591516	0.556	0.314	1.99e-118	7	PSMA4
1.23e-122	0.39856	0.979	0.702	2.94e-118	7	ATP5F1E
1.36e-122	0.673207	0.462	0.245	3.25e-118	7	SF3B4
2.2e-122	0.566106	0.558	0.318	5.26e-118	7	MAT2B
2.41e-122	0.40047	0.864	0.551	5.75e-118	7	RPL31
3.24e-122	0.335679	0.544	0.292	7.75e-118	7	REV3L
3.78e-122	0.718873	0.451	0.238	9.02e-118	7	ORMDL2
3.99e-122	0.562556	0.426	0.218	9.53e-118	7	GPS1
4.63e-122	0.50891	0.576	0.323	1.11e-117	7	NDUFA3
6.09e-122	0.385242	0.611	0.353	1.45e-117	7	MKNK2
8.21e-122	0.69245	0.446	0.234	1.96e-117	7	PYURF
1.14e-121	0.430958	0.572	0.321	2.71e-117	7	FAM50A
1.49e-121	0.522839	0.547	0.31	3.57e-117	7	CALHM2
1.55e-121	0.701793	0.407	0.206	3.71e-117	7	SDHC
1.79e-121	0.379285	0.485	0.256	4.27e-117	7	NFKB2
2.4e-121	0.91516	0.403	0.207	5.74e-117	7	DDIT4
3.43e-121	0.705512	0.395	0.197	8.2e-117	7	MRPS24
3.56e-121	0.422767	0.686	0.412	8.51e-117	7	HMOX2
7.03e-121	0.67958	0.441	0.229	1.68e-116	7	PSENEN
1.19e-120	0.613201	0.475	0.253	2.85e-116	7	NENF
1.42e-120	0.773703	0.362	0.176	3.39e-116	7	NTAN1
1.45e-120	0.3556	0.981	0.709	3.47e-116	7	RPL12
1.74e-120	0.554939	0.512	0.284	4.17e-116	7	C1orf43
1.96e-120	0.613083	0.477	0.255	4.67e-116	7	GYPC
2.88e-120	0.576637	0.555	0.313	6.87e-116	7	ERH
3.27e-120	0.335045	0.762	0.467	7.81e-116	7	CDC25B
4.89e-120	0.389844	0.972	0.682	1.17e-115	7	RPS21
5.86e-120	0.455053	0.755	0.469	1.4e-115	7	RPS4Y1
9.85e-120	0.437461	0.657	0.378	2.35e-115	7	ATP5MPL
1.12e-119	0.553671	0.481	0.256	2.67e-115	7	MRPL33
1.37e-119	0.656869	0.402	0.203	3.28e-115	7	C14orf119
1.6e-119	0.833369	0.342	0.163	3.82e-115	7	YIF1A
1.78e-119	0.711919	0.341	0.16	4.25e-115	7	HCFC1R1
2.03e-119	0.542008	0.597	0.347	4.85e-115	7	PSMB2
2.28e-119	0.579786	0.451	0.236	5.44e-115	7	WASHC3
2.47e-119	0.514662	0.67	0.408	5.89e-115	7	LMAN2
2.62e-119	0.602725	0.487	0.26	6.26e-115	7	SNRPC
4.2e-119	0.594755	0.445	0.23	1e-114	7	SMIM26
5.32e-119	0.338293	0.998	0.864	1.27e-114	7	RPL41
5.58e-119	0.455469	0.543	0.302	1.33e-114	7	MED10
6.21e-119	0.722888	0.318	0.145	1.48e-114	7	RFXANK
7.53e-119	0.466871	0.689	0.422	1.8e-114	7	C11orf58
1.02e-118	0.690007	0.402	0.204	2.44e-114	7	ARL2BP
1.39e-118	0.615467	0.466	0.252	3.31e-114	7	ZDHHC24
1.76e-118	0.537987	0.466	0.251	4.21e-114	7	RBM38
2.35e-118	0.489096	0.642	0.389	5.61e-114	7	MTPN
2.42e-118	0.513894	0.51	0.284	5.78e-114	7	ETFA
2.83e-118	0.527365	0.622	0.365	6.76e-114	7	CUTA
5.85e-118	0.89188	0.303	0.138	1.4e-113	7	SNAPIN
1.06e-117	0.483149	0.663	0.402	2.53e-113	7	ANP32A
1.28e-117	0.539414	0.429	0.22	3.05e-113	7	SCNM1
2.13e-117	0.59824	0.432	0.223	5.1e-113	7	TMEM256
3.44e-117	0.445718	0.565	0.319	8.21e-113	7	COMT
5.03e-117	0.41572	0.729	0.425	1.2e-112	7	GNG5
1.05e-116	0.407464	0.68	0.415	2.52e-112	7	TUBA1A
1.11e-116	0.58454	0.488	0.268	2.65e-112	7	CYB561D2
1.12e-116	0.499616	0.54	0.295	2.68e-112	7	ANAPC11
1.18e-116	0.746361	0.343	0.164	2.81e-112	7	MPST
1.67e-116	0.616732	0.452	0.241	3.99e-112	7	RBM42
2.76e-116	0.377327	0.317	0.141	6.6e-112	7	FKBP5
3.27e-116	0.407249	0.69	0.401	7.8e-112	7	SNRPB
3.89e-116	0.598151	0.478	0.258	9.3e-112	7	NDUFB6
4.46e-116	0.407519	0.879	0.621	1.07e-111	7	HCLS1
5.92e-116	0.401627	0.812	0.522	1.41e-111	7	COTL1
1.49e-115	0.382493	0.687	0.416	3.55e-111	7	SH3BGRL
1.57e-115	0.634369	0.493	0.273	3.75e-111	7	EMC7
1.83e-115	0.539579	0.516	0.287	4.36e-111	7	MRPL20
2.19e-115	0.629766	0.409	0.21	5.24e-111	7	MRPL43
4.14e-115	0.384178	0.449	0.234	9.89e-111	7	CARS
4.23e-115	0.398747	0.911	0.658	1.01e-110	7	EFHD2
6.91e-115	0.40434	0.608	0.357	1.65e-110	7	CAPN1
9.62e-115	0.607465	0.478	0.261	2.3e-110	7	SCP2
1.13e-114	0.651179	0.457	0.248	2.69e-110	7	PPT1
3.54e-114	0.563922	0.44	0.231	8.46e-110	7	SS18L2
3.88e-114	0.719368	0.335	0.159	9.26e-110	7	CDC26
7.05e-114	0.371902	0.869	0.556	1.68e-109	7	TPI1
7.67e-114	0.451039	0.584	0.328	1.83e-109	7	PTMS
9.32e-114	0.415471	0.422	0.216	2.23e-109	7	TENT5C
2.78e-113	0.740375	0.365	0.182	6.63e-109	7	NAXE
2.91e-113	0.47496	0.668	0.407	6.96e-109	7	ATP5F1A
3.28e-113	0.394249	0.964	0.759	7.84e-109	7	TPM3
3.33e-113	0.31973	0.994	0.87	7.94e-109	7	FLNA
8.05e-113	0.623466	0.389	0.196	1.92e-108	7	MRPS18C
9.69e-113	0.555093	0.485	0.266	2.31e-108	7	PSMB4
9.92e-113	0.339514	0.457	0.238	2.37e-108	7	MXD1
1.4e-112	0.459791	0.587	0.341	3.34e-108	7	SERINC3
2.3e-112	0.455764	0.401	0.205	5.5e-108	7	MCRS1
2.72e-112	0.625041	0.406	0.208	6.49e-108	7	POLR2I
3.24e-112	0.399305	0.781	0.477	7.73e-108	7	SOD1
3.26e-112	0.488422	0.651	0.393	7.78e-108	7	PSMA5
3.32e-112	0.371328	0.894	0.575	7.94e-108	7	PFDN5
4.58e-112	0.663102	0.407	0.214	1.09e-107	7	CAT
7.09e-112	0.601608	0.424	0.224	1.69e-107	7	DNAJA2
2.03e-111	0.634321	0.428	0.227	4.86e-107	7	ACP1
2.17e-111	0.424308	0.666	0.408	5.18e-107	7	UBE2L3
3.1e-111	0.412004	0.404	0.202	7.39e-107	7	ZBTB44
4.52e-111	0.519196	0.42	0.217	1.08e-106	7	MMP24OS
6.14e-111	0.530655	0.509	0.287	1.47e-106	7	ERGIC3
6.47e-111	0.373445	0.682	0.403	1.54e-106	7	RPS17
9.45e-111	0.556338	0.523	0.299	2.26e-106	7	SNX17
1.4e-110	0.514954	0.529	0.3	3.33e-106	7	IMP3
1.51e-110	0.575691	0.444	0.238	3.6e-106	7	UQCRC2
2.05e-110	0.487865	0.553	0.312	4.91e-106	7	MRPL52
4.73e-110	0.411785	0.896	0.603	1.13e-105	7	TMBIM6
5.16e-110	0.547087	0.456	0.246	1.23e-105	7	MPG
9.35e-110	0.635042	0.472	0.263	2.23e-105	7	ATRAID
1.23e-109	0.69355	0.351	0.173	2.94e-105	7	CPNE3
1.41e-109	0.4746	0.313	0.143	3.37e-105	7	CYB561
1.43e-109	0.575241	0.494	0.277	3.4e-105	7	NUTF2
1.72e-109	0.364731	0.956	0.687	4.1e-105	7	RPL37A
2.29e-109	0.517492	0.614	0.365	5.48e-105	7	TMED9
2.94e-109	0.537164	0.358	0.177	7.02e-105	7	TSSC4
3.24e-109	0.480757	0.559	0.327	7.74e-105	7	PSMD4
5.01e-109	0.420825	0.384	0.191	1.2e-104	7	PRDM8
5.58e-109	0.542221	0.489	0.273	1.33e-104	7	PGLS
6.72e-109	0.347373	0.673	0.404	1.6e-104	7	COX17
1e-108	0.427218	0.491	0.272	2.4e-104	7	CLN3
2.33e-108	0.586671	0.492	0.277	5.56e-104	7	ELOVL1
2.64e-108	0.382284	0.399	0.2	6.31e-104	7	PKIA
2.69e-108	0.583661	0.442	0.237	6.43e-104	7	MRPS36
2.87e-108	0.339738	0.695	0.408	6.85e-104	7	SNRPG
4.11e-108	0.476009	0.481	0.267	9.83e-104	7	FAM104A
4.67e-108	0.587997	0.446	0.243	1.12e-103	7	SUCLG1
6.65e-108	0.381507	0.367	0.181	1.59e-103	7	MAP4K2
1.13e-107	0.720431	0.506	0.294	2.7e-103	7	IFNG
1.29e-107	0.551794	0.421	0.224	3.07e-103	7	PPP1R11
1.53e-107	0.461342	0.407	0.212	3.66e-103	7	PIM3
1.65e-107	0.622748	0.429	0.231	3.94e-103	7	PSMD6
1.91e-107	0.368653	0.687	0.422	4.56e-103	7	HMGN3
1.94e-107	0.470891	0.564	0.327	4.64e-103	7	AP2S1
4.97e-107	0.564416	0.316	0.148	1.19e-102	7	RNF19B
5.48e-107	0.454993	0.734	0.464	1.31e-102	7	BAX
7.84e-107	0.480379	0.507	0.289	1.87e-102	7	EIF4EBP2
9.41e-107	0.627634	0.475	0.266	2.25e-102	7	OSTC
1.16e-106	0.369939	0.758	0.484	2.76e-102	7	BIN1
1.9e-106	0.394208	0.664	0.403	4.53e-102	7	CLTA
2.55e-106	0.510449	0.498	0.279	6.09e-102	7	MRPL57
1.34e-105	0.480249	0.492	0.273	3.21e-101	7	RPS19BP1
1.97e-105	0.453826	0.562	0.323	4.72e-101	7	RGS10
2.05e-105	0.539273	0.425	0.228	4.9e-101	7	NSMCE1
3.76e-105	0.607178	0.445	0.243	8.97e-101	7	MAGOH
3.86e-105	0.519185	0.533	0.308	9.22e-101	7	TMEM179B
3.95e-105	0.309239	0.708	0.424	9.42e-101	7	H2AFV
4.31e-105	0.439683	0.439	0.235	1.03e-100	7	CFAP97
4.74e-105	0.755118	0.351	0.177	1.13e-100	7	LSM1
5.64e-105	0.379033	0.726	0.46	1.35e-100	7	ANXA11
9.84e-105	0.338317	0.772	0.483	2.35e-100	7	LAMTOR4
1.78e-104	0.686593	0.359	0.181	4.26e-100	7	NDUFA5
3.73e-104	0.536209	0.472	0.262	8.91e-100	7	ZMAT2
5.81e-104	0.724053	0.302	0.143	1.39e-99	7	ARL14EP
9.29e-104	0.511308	0.48	0.27	2.22e-99	7	PSMB7
1.36e-103	0.401254	0.389	0.2	3.24e-99	7	UXS1
1.5e-103	0.683178	0.364	0.187	3.58e-99	7	IFI35
2.73e-103	0.42889	0.385	0.198	6.53e-99	7	INPP5K
3.51e-103	0.411989	0.628	0.381	8.39e-99	7	AP2M1
3.77e-103	0.399879	0.648	0.395	9e-99	7	LRP10
3.94e-103	0.552912	0.469	0.262	9.4e-99	7	PPP1R7
5.42e-103	0.686218	0.372	0.193	1.29e-98	7	ESD
8.35e-103	0.486485	0.497	0.281	2e-98	7	COMMD7
9.55e-103	0.429446	0.608	0.362	2.28e-98	7	CTDNEP1
1.41e-102	0.422264	0.507	0.285	3.37e-98	7	GADD45GIP1
1.79e-102	0.666272	0.371	0.19	4.27e-98	7	ALKBH7
2.63e-102	0.426662	0.544	0.317	6.28e-98	7	NAPA
3.49e-102	0.530426	0.336	0.166	8.34e-98	7	PTOV1
5.81e-102	0.476509	0.595	0.358	1.39e-97	7	SRP9
1.33e-101	0.363883	0.968	0.745	3.19e-97	7	ARPC2
1.45e-101	0.468483	0.52	0.299	3.47e-97	7	PSMF1
1.92e-101	0.53664	0.448	0.247	4.58e-97	7	TKT
2.14e-101	0.623335	0.392	0.208	5.11e-97	7	TMEM208
2.15e-101	0.333631	0.641	0.39	5.15e-97	7	TSC22D4
2.52e-101	0.47526	0.366	0.186	6.03e-97	7	PEX16
4.23e-101	0.657406	0.365	0.19	1.01e-96	7	CSRP1
7.8e-101	0.354087	0.68	0.419	1.86e-96	7	UBE2I
8.47e-101	0.480056	0.487	0.273	2.02e-96	7	SARS
9.07e-101	0.454333	0.553	0.327	2.17e-96	7	DBNL
1.35e-100	0.335274	0.482	0.268	3.23e-96	7	MOB2
1.41e-100	0.369753	0.647	0.398	3.36e-96	7	PSMA1
1.49e-100	0.451787	0.592	0.361	3.55e-96	7	IK
2.08e-100	0.472246	0.304	0.144	4.98e-96	7	CMTM7
2.98e-100	0.439235	0.611	0.371	7.12e-96	7	SERP1
4.3e-100	0.716843	0.344	0.174	1.03e-95	7	SHMT2
7.44e-100	0.346477	0.363	0.181	1.78e-95	7	KLHL5
1.24e-99	0.424428	0.664	0.403	2.96e-95	7	SPCS1
1.91e-99	0.447155	0.637	0.392	4.55e-95	7	HSPA1A
1.94e-99	0.370206	0.328	0.16	4.63e-95	7	MED16
2.81e-99	0.467721	0.502	0.283	6.72e-95	7	TOMM5
3.02e-99	0.571955	0.397	0.212	7.22e-95	7	HIKESHI
3.79e-99	0.638874	0.34	0.171	9.05e-95	7	RRAGA
5.55e-99	0.334714	0.73	0.446	1.32e-94	7	TOMM7
7.82e-99	0.421608	0.49	0.275	1.87e-94	7	TMEM123
8.22e-99	0.439611	0.396	0.203	1.96e-94	7	MAL
8.31e-99	0.416703	0.474	0.267	1.99e-94	7	USP10
8.6e-99	0.44401	0.557	0.328	2.05e-94	7	EBP
1.24e-98	0.553087	0.728	0.488	2.95e-94	7	H1FX
1.28e-98	0.578904	0.366	0.192	3.06e-94	7	SLC25A39
1.65e-98	0.397534	0.844	0.596	3.94e-94	7	CD70
3.21e-98	0.368506	0.558	0.324	7.66e-94	7	SNHG6
4.72e-98	0.511717	0.576	0.348	1.13e-93	7	DDOST
5.1e-98	0.559914	0.347	0.176	1.22e-93	7	IDH3B
7.91e-98	0.562286	0.384	0.204	1.89e-93	7	KXD1
7.94e-98	0.40224	0.496	0.285	1.9e-93	7	AP1M1
1.41e-97	0.444785	0.548	0.323	3.36e-93	7	ZNF706
2.08e-97	0.670999	0.326	0.163	4.97e-93	7	ABT1
2.44e-97	0.644059	0.334	0.168	5.83e-93	7	ZCRB1
4.55e-97	0.31397	0.724	0.47	1.09e-92	7	DNAJA1
4.63e-97	0.467008	0.425	0.231	1.11e-92	7	WBP2
6.49e-97	0.460481	0.435	0.237	1.55e-92	7	SLIRP
7.2e-97	0.446679	0.712	0.466	1.72e-92	7	PIM1
8.3e-97	0.624535	0.355	0.184	1.98e-92	7	TRAPPC2L
1.2e-96	0.448008	0.407	0.217	2.88e-92	7	PWP1
1.32e-96	0.486378	0.428	0.234	3.15e-92	7	SNF8
1.73e-96	0.345961	0.974	0.737	4.14e-92	7	CD3D
1.85e-96	0.504803	0.466	0.266	4.41e-92	7	RNF187
2.09e-96	0.387598	0.72	0.46	4.99e-92	7	TUBA4A
2.22e-96	0.599243	0.371	0.194	5.31e-92	7	POLR2F
3.92e-96	0.396077	0.714	0.445	9.37e-92	7	HLA-DQA2
4.41e-96	0.343529	0.944	0.663	1.05e-91	7	RPS29
4.78e-96	0.410136	0.587	0.346	1.14e-91	7	MRPL51
4.88e-96	0.496484	0.506	0.299	1.17e-91	7	DCTN2
6.37e-96	0.460058	0.5	0.289	1.52e-91	7	NDUFC1
6.56e-96	0.463593	0.482	0.278	1.57e-91	7	GPR108
6.87e-96	0.684472	0.35	0.18	1.64e-91	7	C1QBP
9.02e-96	0.584189	0.332	0.166	2.15e-91	7	TCTEX1D2
1.02e-95	0.643038	0.337	0.173	2.44e-91	7	ADSL
1.69e-95	0.484166	0.425	0.236	4.04e-91	7	SRA1
1.75e-95	0.345619	0.506	0.289	4.18e-91	7	BIRC3
1.91e-95	0.489317	0.487	0.278	4.57e-91	7	MICOS13
1.98e-95	0.522935	0.382	0.203	4.72e-91	7	PQBP1
2.6e-95	0.506683	0.424	0.234	6.2e-91	7	ACAT1
2.71e-95	0.624609	0.364	0.189	6.47e-91	7	CHCHD1
6.59e-95	0.544559	0.334	0.168	1.57e-90	7	DEDD2
7.42e-95	0.341343	0.674	0.427	1.77e-90	7	RTN4
1.31e-94	0.614363	0.379	0.203	3.12e-90	7	TRAPPC4
1.52e-94	0.499735	0.526	0.313	3.62e-90	7	CMTM3
2.06e-94	0.48674	0.392	0.21	4.92e-90	7	SDHB
2.46e-94	0.520883	0.384	0.204	5.89e-90	7	MRFAP1
3.11e-94	0.422287	0.497	0.288	7.42e-90	7	ACTR1A
3.74e-94	0.569349	0.318	0.158	8.93e-90	7	GBA
1.05e-93	0.602651	0.334	0.17	2.52e-89	7	FAM32A
1.27e-93	0.462587	0.498	0.289	3.03e-89	7	CCT8
[truncated: 12,120 more rows]
